# Supplementary material for: Fetal growth delay caused by loss of non-canonical imprinting is resolved late in pregnancy and culminates in offspring overgrowth
Source: eLife journal article supplement (doi:10.7554/elife.81875), 2024-05-07
Supplement: supp [file elife-81875-supp-v1.zip]

**A** *Eed* Offspring: Proportion of surviving embryos per female

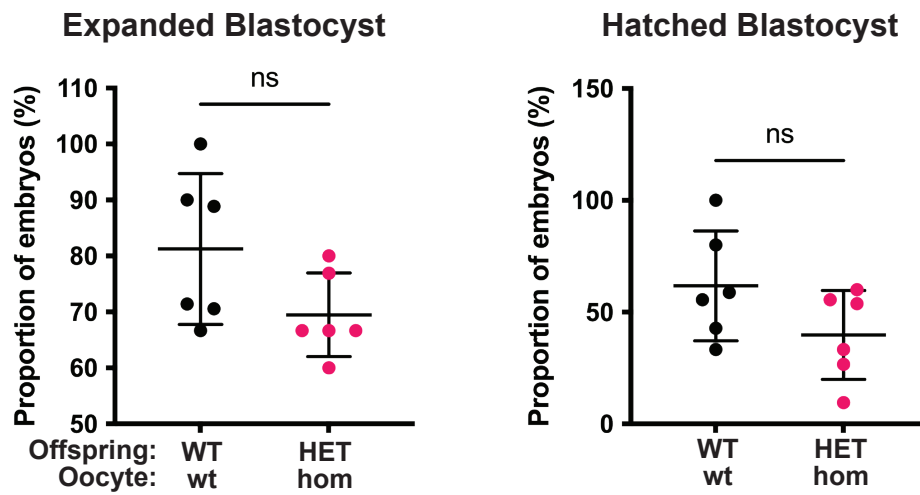

**B** Differential Stained Blastocyst

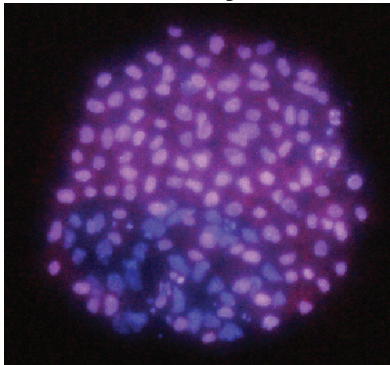

**C** Proportion of TE and ICM per embryo

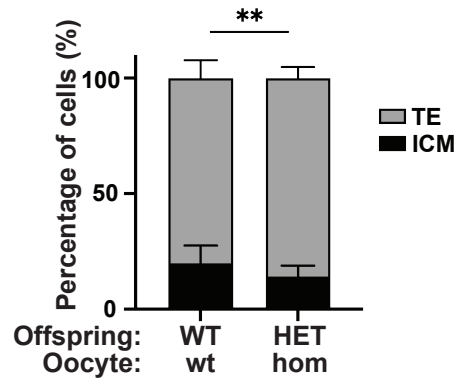

Figure 1 - figure supplement 1
