# Supplementary material for: Fetal growth delay caused by loss of non-canonical imprinting is resolved late in pregnancy and culminates in offspring overgrowth
Source: eLife journal article supplement (doi:10.7554/elife.81875), 2024-05-07
Supplement: supp [file elife-81875-supp-v1.zip]

### A E9.5 Embryo + Extraembryonic tissue weight

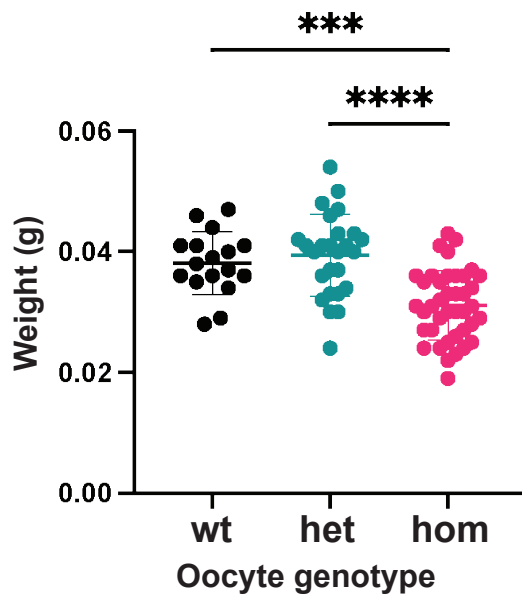

## B E14.5 Forelimb

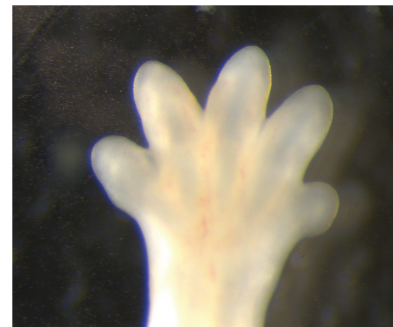

Offspring: WT  
Oocyte: wt

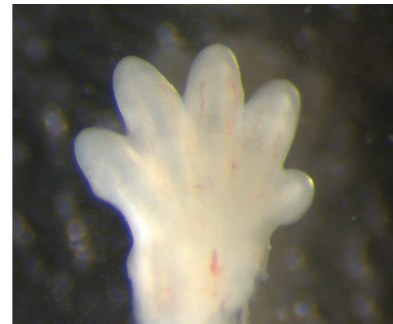

Offspring: HET  
Oocyte: het

### C Embryo resorptions or deaths at E17.5

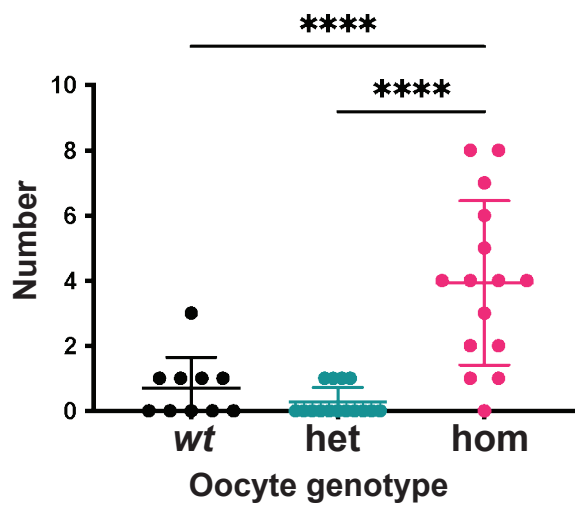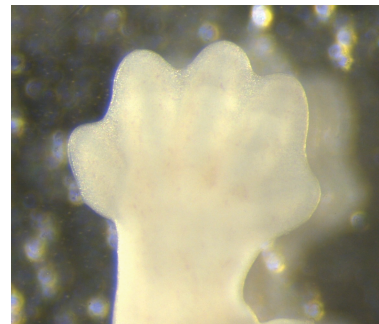

Offspring: HET  
Oocyte: hom

### Figure 2 - figure supplement 1
