# Supplementary material for: Fetal growth delay caused by loss of non-canonical imprinting is resolved late in pregnancy and culminates in offspring overgrowth
Source: eLife. 2024 May 30;13:e81875. doi: 10.7554/eLife.81875 (PMC11139480; doi:10.7554/eLife.81875)
Supplement: Supplementary file 1. — (A) Eed Placenta differentially expressed genes (DEGs) - List of significant Eed female Placenta DEGs (HET-hom vs HET-het; false discovery rate, FDR <0.05; 2083 DEGs) (B) Differential Gene Expression Analysis Male HET-hom Placenta vs HET-het Placenta (No FDR; p<0.05) (C) Differential Gene Expression Analysis Female HET-hom vs HET-het Placenta (No FDR; p<0.05) (D) Genes Commonly Differentially Expressed in Male and Female HET-hom vs HET-het Placenta (No FDR; P<0.05) (E) Eed Placenta DEGs vs E14.5 single-cell RNA-seq: Comparison of Eed Placenta DEGs list with published single-cell RNA-seq data from E14.5 C57BL/6 placentas (F) Eed Placenta DEGs vs Imprinted genes: Comparison of Eed Placenta DEGs vs Mouse Imprinted genes (G) Eed Placenta DEG relative enrichment per chromosome (H) Eed Placental DMRs HET-het vs HET-hom: List of significant Eed female placenta differentially methylated regions (FDR/q<0.05). (I) Eed Placental DMRs WT-wt vs HET-hom: List of significant Eed female placenta differentially methylated regions (FDR/q<0.05). (J) Eed Placental DMRs WT-wt vs HET-het: List of significant Eed female placenta differentially methylated regions (FDR/q<0.05). (K) Metabolites detected at significantly different levels between E17.5 female HET-hom and HET-het fetal blood samples (FDR <0.05) (L) Metabolites detected at significantly different levels between E17.5 female HET-hom and WT-wt fetal blood samples (FDR <0.05) (M) Metabolites detected at significantly different levels between E17.5 female HET-het and WT-wt fetal blood samples (FDR <0.05). [file elife-81875-supp1.xlsx]

## Sheet: Summary sheet
This sheet contains a summary of all sheets within this file
Supplementray File 1	Sheet Name - Description
Supplementary File 1A	1_Eed Placenta DEGs - List of significant Eed female Placenta DEGs (FDR < 0.05; 2083 DEGs)
Supplementary File 1B	2_Differential Gene Expression Analysis Male Eed Homozygous Placenta vs Eed Heterozygous Placenta (No FDR; P<0.05)
Supplementary File 1C	3_Differential Gene Expression Analysis Female Eed Homozygous Placenta vs Eed Heterozygous Placenta (No FDR; P<0.05)
Supplementary File 1D	4_Genes Commonly Differentially Expressed in Male and Female Eed Homozygous Placenta vs Eed Heterozygous Placenta (No FDR; P<0.05)
Supplementary File 1E	5_Eed Placenta DEGs vs E14.5 single cell RNA-seq - Comparison of Eed Placenta DEGs list with published single cell RNA-seq data from E14.5 C57BL/6 placentas
Supplementary File 1F	6_Eed Placenta DEGs vs Imprinted genes - Comparison of Eed Placenta DEGs vs Mouse Imprinted genes
Supplementary File 1G	7_Eed Placenta DEG enrichment per chromosome
Supplementary File 1H	8_Eed PlacDMRs HET-het vs HET-hom - List of significant Eed female placenta differentially methylated regions (FDR/q <0.05). HET-het vs HET-hom comparison.
Supplementary File 1I	9_Eed PlacDMRs WT-wt vs HET-hom - List of significant Eed female placenta differentially methylated regions (FDR/q <0.05). WT-wt vs HET-hom comparison.
Supplementary File 1J	10_Eed PlacDMRs WT-wt vs HET-het - List of significant Eed female placenta differentially methylated regions (FDR/q <0.05). WT-wt vs HET-het comparison.
Supplementary File 1K	11_Metabolites detected at differential levels between female HET-hom and HET-het fetal blood samples
Supplementary File 1L	12_Metabolites detected at differential levels between female HET-hom and WT-wt fetal blood samples
Supplementary File 1M	13_Metabolites detected at differential levels between male HET-hom and WT-wt fetal blood samples

## Sheet: 1_F_Eed_Plac DEGs FDR<0.05
Supplementary File 1A: Differential Gene Expression Analysis of Female Eed Homozygous Placenta vs Eed Heterozygous Placenta (FDR<0.05)
This sheet contains Female Eed Placenta DEGs (HOM vs HET; FDR < 0.05)
chr	start	end	width	strand	gene_id	gene_name	gene_biotype	description	entrezid	logFC	AveExpr	t	P.Value	adj.P.Val
X	36911326	36991794	80469	-	ENSMUSG00000050379	Septin6	protein_coding	septin 6 [Source:MGI Symbol;Acc:MGI:1888939]	56526	1.29323	4.91582	6.84089	4.05664e-07	0.000388322
X	12936872	12938128	1257	+	ENSMUSG00000083307	AA414768	processed_pseudogene	expressed sequence AA414768 [Source:MGI Symbol;Acc:MGI:3035137]	245350	1.00422	2.79298	5.98267	2.76673e-06	0.000706661
X	8081453	8090498	9046	-	ENSMUSG00000031165	Was	protein_coding	Wiskott-Aldrich syndrome [Source:MGI Symbol;Acc:MGI:105059]	22376	1.33126	3.20026	5.94751	3.09405e-06	0.000715585
X	53069995	53240111	170117	-	ENSMUSG00000061082	Plac1	protein_coding	placental specific protein 1 [Source:MGI Symbol;Acc:MGI:1926287]	56096	1.17264	5.05249	5.83207	3.98307e-06	0.000766029
X	37048845	37050418	1574	+	ENSMUSG00000044400	Sowahd	protein_coding	sosondowah ankyrin repeat domain family member D [Source:MGI Symbol;Acc:MGI:3045274]	245381	1.35931	1.89043	5.4855	9.21031e-06	0.00111956
X	6779306	6948363	169058	+	ENSMUSG00000062393	Dgkk	protein_coding	diacylglycerol kinase kappa [Source:MGI Symbol;Acc:MGI:3580254]	331374	-1.04151	4.77715	-5.34724	1.23572e-05	0.00134229
X	108737016	108834372	97357	-	ENSMUSG00000063663	Brwd3	protein_coding	bromodomain and WD repeat domain containing 3 [Source:MGI Symbol;Acc:MGI:3029414]	382236	0.783013	6.363	5.19771	1.73312e-05	0.00157061
X	159372178	159389928	17751	+	ENSMUSG00000067194	Eif1ax	protein_coding	eukaryotic translation initiation factor 1A, X-linked [Source:MGI Symbol;Acc:MGI:1913485]	66235	-0.856286	3.49825	-5.06661	2.38262e-05	0.00181622
X	7371274	7375830	4557	-	ENSMUSG00000046269	Usp27x	protein_coding	ubiquitin specific peptidase 27, X chromosome [Source:MGI Symbol;Acc:MGI:1859645]	54651	0.915255	4.09741	4.94531	3.20497e-05	0.0020766
X	75785654	75875182	89529	-	ENSMUSG00000016382	Pls3	protein_coding	plastin 3 (T-isoform) [Source:MGI Symbol;Acc:MGI:104807]	102866	-0.760196	5.86378	-4.93492	3.25185e-05	0.0020839
X	162961992	162964599	2608	-	ENSMUSG00000040808	S100g	protein_coding	S100 calcium binding protein G [Source:MGI Symbol;Acc:MGI:104528]	12309	-1.08233	6.45515	-4.8353	4.25525e-05	0.00244095
X	73033981	73037103	3123	-	ENSMUSG00000050424	Pnma5	protein_coding	paraneoplastic antigen family 5 [Source:MGI Symbol;Acc:MGI:2180566]	385377	-2.03627	0.435498	-4.82682	4.98055e-05	0.0026509
X	162901238	163032508	131271	+	ENSMUSG00000031360	Ctps2	protein_coding	cytidine 5'-triphosphate synthase 2 [Source:MGI Symbol;Acc:MGI:1933185]	55936	-0.621044	4.30557	-4.74903	5.06485e-05	0.00265662
X	60891366	60893430	2065	-	ENSMUSG00000045179	Sox3	protein_coding	SRY (sex determining region Y)-box 3 [Source:MGI Symbol;Acc:MGI:98365]	20675	-1.49001	0.272075	-4.72316	5.92599e-05	0.00288153
X	101264378	101268255	3878	-	ENSMUSG00000031304	Il2rg	protein_coding	interleukin 2 receptor, gamma chain [Source:MGI Symbol;Acc:MGI:96551]	16186	0.826562	5.58681	4.65915	6.35988e-05	0.00298797
X	73233688	73243130	9443	-	ENSMUSG00000031362	Xlr4c	protein_coding	X-linked lymphocyte-regulated 4C [Source:MGI Symbol;Acc:MGI:3574099]	72891	-1.33805	1.17533	-4.60707	7.69592e-05	0.00340667
X	93654863	93749951	95089	+	ENSMUSG00000035246	Pcyt1b	protein_coding	phosphate cytidylyltransferase 1, choline, beta isoform [Source:MGI Symbol;Acc:MGI:2147987]	236899	-1.67996	0.726007	-4.61781	7.90537e-05	0.00345939
X	53055046	53057190	2145	-	ENSMUSG00000087365	C430049B03Rik	processed_transcript	RIKEN cDNA C430049B03 gene [Source:MGI Symbol;Acc:MGI:1924903]	NA	0.577774	5.51407	4.43567	0.00010803	0.00416672
X	8193848	8206525	12678	-	ENSMUSG00000031169	Porcn	protein_coding	porcupine O-acyltransferase [Source:MGI Symbol;Acc:MGI:1890212]	53627	-1.56717	2.937	-4.34581	0.000151979	0.00501109
X	100767722	100818410	50689	+	ENSMUSG00000000881	Dlg3	protein_coding	discs large MAGUK scaffold protein 3 [Source:MGI Symbol;Acc:MGI:1888986]	53310	0.568525	6.84147	4.2026	0.00019011	0.00568695
X	150983141	151017322	34182	-	ENSMUSG00000025266	Gnl3l	protein_coding	guanine nucleotide binding protein-like 3 (nucleolar)-like [Source:MGI Symbol;Acc:MGI:2448557]	237107	0.555645	4.88987	4.15013	0.000215845	0.00614511
X	150645304	150657583	12280	-	ENSMUSG00000025272	Tro	protein_coding	trophinin [Source:MGI Symbol;Acc:MGI:1928994]	56191	-1.07324	3.46391	-4.10598	0.000252906	0.00659245
X	94188707	94212862	24156	-	ENSMUSG00000035150	Eif2s3x	protein_coding	eukaryotic translation initiation factor 2, subunit 3, structural gene X-linked [Source:MGI Symbol;Acc:MGI:1349431]	26905	0.423752	4.78007	4.06635	0.000264011	0.00671692
X	161717069	161779496	62428	+	ENSMUSG00000043518	Rai2	protein_coding	retinoic acid induced 2 [Source:MGI Symbol;Acc:MGI:1344378]	24004	-1.73377	0.685683	-4.12681	0.000268817	0.00678173
X	71420060	71492849	72790	-	ENSMUSG00000035776	Cd99l2	protein_coding	CD99 antigen-like 2 [Source:MGI Symbol;Acc:MGI:2177151]	171486	-0.674735	5.67621	-4.05917	0.000270512	0.00679206
X	61709497	61710955	1459	+	ENSMUSG00000057615	Ldoc1	protein_coding	regulator of NFKB signaling [Source:MGI Symbol;Acc:MGI:2685212]	434784	0.876806	4.54424	3.98361	0.000331622	0.00774256
X	7930120	7947889	17770	-	ENSMUSG00000031161	Hdac6	protein_coding	histone deacetylase 6 [Source:MGI Symbol;Acc:MGI:1333752]	15185	0.674812	5.65736	3.95849	0.000345412	0.00795539
X	60557728	60807993	250266	+	ENSMUSG00000067835	Gm14661	antisense	predicted gene 14661 [Source:MGI Symbol;Acc:MGI:3641636]	NA	-2.41757	-2.11732	-4.05678	0.000352707	0.00803039
X	74409483	74429194	19712	-	ENSMUSG00000031400	G6pdx	protein_coding	glucose-6-phosphate dehydrogenase X-linked [Source:MGI Symbol;Acc:MGI:105979]	14381	-0.406451	4.71891	-3.9124	0.000383123	0.00840854
X	10715013	10719690	4678	+	ENSMUSG00000008035	Mid1ip1	protein_coding	Mid1 interacting protein 1 (gastrulation specific G12-like (zebrafish)) [Source:MGI Symbol;Acc:MGI:1915291]	68041	-1.12298	2.08437	-3.9304	0.000392661	0.00855476
X	101640060	101684351	44292	+	ENSMUSG00000034160	Ogt	protein_coding	O-linked N-acetylglucosamine (GlcNAc) transferase (UDP-N-acetylglucosamine:polypeptide-N-acetylglucosaminyl transferase) [Source:MGI Symbol;Acc:MGI:1339639]	108155	0.55496	5.49501	3.77255	0.000538244	0.0102662
X	163909017	163933666	24650	+	ENSMUSG00000031367	Ap1s2	protein_coding	adaptor-related protein complex 1, sigma 2 subunit [Source:MGI Symbol;Acc:MGI:1889383]	108012	-0.828817	2.70253	-3.74682	0.000586764	0.0107886
X	150547375	150570638	23264	+	ENSMUSG00000025270	Alas2	protein_coding	aminolevulinic acid synthase 2, erythroid [Source:MGI Symbol;Acc:MGI:87990]	11656	-1.78881	7.50985	-3.79108	0.000624721	0.0111518
X	98148769	98323215	174447	+	ENSMUSG00000046532	Ar	protein_coding	androgen receptor [Source:MGI Symbol;Acc:MGI:88064]	11835	-1.75107	-0.0064206	-3.7671	0.000658898	0.0114939
X	35888832	36076562	187731	+	ENSMUSG00000031093	Dock11	protein_coding	dedicator of cytokinesis 11 [Source:MGI Symbol;Acc:MGI:1923224]	75974	-0.633742	4.43419	-3.63127	0.000759771	0.0124326
X	20425688	20519939	94252	+	ENSMUSG00000037315	Jade3	protein_coding	jade family PHD finger 3 [Source:MGI Symbol;Acc:MGI:2148019]	382207	0.563279	7.17983	3.61654	0.000783771	0.0125963
X	56731787	56793346	61560	+	ENSMUSG00000023092	Fhl1	protein_coding	four and a half LIM domains 1 [Source:MGI Symbol;Acc:MGI:1298387]	14199	-0.858619	4.45325	-3.60827	0.000825162	0.01295
X	53724826	53738441	13616	+	ENSMUSG00000055555	Ct55	protein_coding	cancer/testis antigen 55 [Source:MGI Symbol;Acc:MGI:1922263]	75013	-1.00516	3.52556	-3.58991	0.000885478	0.0133879
X	134756595	134761455	4861	+	ENSMUSG00000049047	Armcx3	protein_coding	armadillo repeat containing, X-linked 3 [Source:MGI Symbol;Acc:MGI:1918953]	71703	-0.977597	1.26203	-3.53153	0.00101553	0.0146873
X	102066544	102071304	4761	-	ENSMUSG00000049191	Rtl5	protein_coding	retrotransposon Gag like 5 [Source:MGI Symbol;Acc:MGI:3045324]	331474	-1.17059	-0.0145891	-3.52328	0.00107734	0.0151938
X	140456613	140476140	19528	+	ENSMUSG00000031432	Prps1	protein_coding	phosphoribosyl pyrophosphate synthetase 1 [Source:MGI Symbol;Acc:MGI:97775]	19139	-0.595998	1.79537	-3.46945	0.00111702	0.0155431
X	159627272	159978069	350798	+	ENSMUSG00000040990	Sh3kbp1	protein_coding	SH3-domain kinase binding protein 1 [Source:MGI Symbol;Acc:MGI:1889583]	58194	0.736185	6.08478	3.43474	0.00123185	0.0164915
X	51003912	51018018	14107	-	ENSMUSG00000050029	Rap2c	protein_coding	RAP2C, member of RAS oncogene family [Source:MGI Symbol;Acc:MGI:1919315]	72065	0.421905	5.80068	3.4116	0.00127365	0.0168271
X	134149043	134162076	13034	-	ENSMUSG00000031258	Xkrx	protein_coding	X-linked Kx blood group related, X-linked [Source:MGI Symbol;Acc:MGI:3584011]	331524	1.60308	-0.66914	3.48946	0.0012765	0.0168271
X	150588229	150643878	55650	+	ENSMUSG00000025271	Pfkfb1	protein_coding	6-phosphofructo-2-kinase/fructose-2,6-biphosphatase 1 [Source:MGI Symbol;Acc:MGI:107816]	18639	0.623528	1.95069	3.38516	0.00136899	0.0176421
X	73342621	73359080	16460	+	ENSMUSG00000031365	Zfp275	protein_coding	zinc finger protein 275 [Source:MGI Symbol;Acc:MGI:1350985]	27081	0.428893	3.48088	3.26495	0.00180173	0.0210385
X	160390690	160498070	107381	+	ENSMUSG00000031298	Adgrg2	protein_coding	adhesion G protein-coupled receptor G2 [Source:MGI Symbol;Acc:MGI:2446854]	237175	-1.10323	0.671648	-3.27838	0.00193004	0.0220572
X	94636069	94643244	7176	+	ENSMUSG00000071723	Gspt2	protein_coding	G1 to S phase transition 2 [Source:MGI Symbol;Acc:MGI:1316727]	14853	-0.879107	1.40639	-3.24735	0.00198045	0.0224276
X	153006469	153009416	2948	+	ENSMUSG00000067215	Usp51	protein_coding	ubiquitin specific protease 51 [Source:MGI Symbol;Acc:MGI:3588217]	635253	1.43079	0.343916	3.27687	0.00208107	0.0231216
X	96096042	96168552	72511	+	ENSMUSG00000031207	Msn	protein_coding	moesin [Source:MGI Symbol;Acc:MGI:97167]	17698	-0.520301	7.74435	-3.20124	0.00209948	0.023217
X	38533274	38576196	42923	-	ENSMUSG00000031095	Cul4b	protein_coding	cullin 4B [Source:MGI Symbol;Acc:MGI:1919834]	72584	0.433333	8.05562	3.18513	0.00217337	0.0236752
X	7878262	7883432	5171	+	ENSMUSG00000031155	Pim2	protein_coding	proviral integration site 2 [Source:MGI Symbol;Acc:MGI:97587]	18715	0.542519	2.81288	3.1726	0.00224874	0.0242206
X	13466110	13489313	23204	+	ENSMUSG00000051228	Nyx	protein_coding	nyctalopin [Source:MGI Symbol;Acc:MGI:2448607]	236690	-0.995132	1.02259	-3.19994	0.00227674	0.0244028
X	81070698	81097872	27175	+	ENSMUSG00000025666	Tmem47	protein_coding	transmembrane protein 47 [Source:MGI Symbol;Acc:MGI:2177570]	192216	-0.892378	0.544157	-3.15829	0.00245879	0.0256357
X	71555918	71560676	4759	+	ENSMUSG00000015217	Hmgb3	protein_coding	high mobility group box 3 [Source:MGI Symbol;Acc:MGI:1098219]	15354	-0.972238	1.08905	-3.12825	0.00269095	0.0270971
X	105120378	105123927	3550	+	ENSMUSG00000031227	Magee1	protein_coding	melanoma antigen, family E, 1 [Source:MGI Symbol;Acc:MGI:2148149]	107528	-0.689872	1.99511	-3.09925	0.00271855	0.0272257
X	53243415	53269805	26391	-	ENSMUSG00000036022	Fam122b	protein_coding	family with sequence similarity 122, member B [Source:MGI Symbol;Acc:MGI:1926005]	78755	0.512391	5.71598	3.06192	0.00290659	0.0286654
X	85701937	85776819	74883	-	ENSMUSG00000025059	Gk	protein_coding	glycerol kinase [Source:MGI Symbol;Acc:MGI:106594]	14933	-0.882957	0.965155	-3.08527	0.00292115	0.028735
X	139333683	139338169	4487	+	ENSMUSG00000051257	Trap1a	protein_coding	tumor rejection antigen P1A [Source:MGI Symbol;Acc:MGI:98818]	22037	0.401808	6.77403	3.02762	0.00313417	0.0301781
X	162566857	162567243	387	+	ENSMUSG00000059461	Gm7331	processed_pseudogene	predicted gene 7331 [Source:MGI Symbol;Acc:MGI:3644702]	NA	-0.753468	1.31738	-3.02483	0.00327757	0.0310831
X	49782536	49797749	15214	-	ENSMUSG00000031111	Igsf1	protein_coding	immunoglobulin superfamily, member 1 [Source:MGI Symbol;Acc:MGI:2147913]	209268	-0.633818	4.15827	-2.9972	0.00342323	0.0319501
X	103697414	103821983	124570	-	ENSMUSG00000033965	Slc16a2	protein_coding	solute carrier family 16 (monocarboxylic acid transporters), member 2 [Source:MGI Symbol;Acc:MGI:1203732]	20502	-1.34781	1.90267	-3.05741	0.00348761	0.0323131
X	70385877	70389417	3541	+	ENSMUSG00000045237	1110012L19Rik	protein_coding	RIKEN cDNA 1110012L19 gene [Source:MGI Symbol;Acc:MGI:1915868]	68618	-0.403011	3.62007	-2.9684	0.00359297	0.0330114
X	10037977	10117709	79733	-	ENSMUSG00000090084	Srpx	protein_coding	sushi-repeat-containing protein [Source:MGI Symbol;Acc:MGI:1858306]	51795	-1.50539	-0.965932	-3.05808	0.00360137	0.0330291
X	167346322	167382749	36428	-	ENSMUSG00000025742	Prps2	protein_coding	phosphoribosyl pyrophosphate synthetase 2 [Source:MGI Symbol;Acc:MGI:97776]	110639	-1.07121	2.30176	-3.00681	0.00368864	0.0334489
X	101768535	101769057	523	+	ENSMUSG00000084284	Tpt1-ps6	processed_pseudogene	tumor protein, translationally-controlled, pseudogene 6 [Source:MGI Symbol;Acc:MGI:2665000]	NA	-0.942673	0.435944	-2.96803	0.00391763	0.0347339
X	69360294	69868037	507744	+	ENSMUSG00000031189	Aff2	protein_coding	AF4/FMR2 family, member 2 [Source:MGI Symbol;Acc:MGI:1202294]	14266	-0.834432	2.1605	-2.95605	0.00392437	0.034741
X	139563316	139673145	109830	+	ENSMUSG00000031438	Rnf128	protein_coding	ring finger protein 128 [Source:MGI Symbol;Acc:MGI:1914139]	66889	0.452008	8.77951	2.92643	0.00396231	0.0349377
X	10485158	10596605	111448	+	ENSMUSG00000058254	Tspan7	protein_coding	tetraspanin 7 [Source:MGI Symbol;Acc:MGI:1298407]	21912	-0.896456	4.47109	-2.93356	0.00420211	0.0363862
X	37804842	37808876	4035	+	ENSMUSG00000095180	Rhox5	protein_coding	reproductive homeobox 5 [Source:MGI Symbol;Acc:MGI:97538]	18617	0.489147	5.08762	2.88503	0.00436555	0.0374639
X	38196573	38252439	55867	-	ENSMUSG00000036502	Tmem255a	protein_coding	transmembrane protein 255A [Source:MGI Symbol;Acc:MGI:3045722]	245386	-1.46894	-0.509659	-2.97463	0.00437354	0.0374639
X	36112110	36171259	59150	+	ENSMUSG00000017057	Il13ra1	protein_coding	interleukin 13 receptor, alpha 1 [Source:MGI Symbol;Acc:MGI:105052]	16164	-0.504758	4.49937	-2.87943	0.00442708	0.0377324
X	99465734	99471273	5540	-	ENSMUSG00000034403	Pja1	protein_coding	praja ring finger ubiquitin ligase 1 [Source:MGI Symbol;Acc:MGI:1101765]	18744	0.526197	4.71529	2.87205	0.0045112	0.0382154
X	7841364	7876626	35263	+	ENSMUSG00000031154	Otud5	protein_coding	OTU domain containing 5 [Source:MGI Symbol;Acc:MGI:1859615]	54644	0.344208	7.33717	2.85329	0.00467224	0.0391038
X	75382399	75396459	14061	+	ENSMUSG00000031198	Fundc2	protein_coding	FUN14 domain containing 2 [Source:MGI Symbol;Acc:MGI:1914641]	67391	-0.704593	2.82823	-2.86145	0.0047552	0.0396222
X	101254528	101260873	6346	+	ENSMUSG00000042903	Foxo4	protein_coding	forkhead box O4 [Source:MGI Symbol;Acc:MGI:1891915]	54601	0.448078	9.87958	2.83847	0.00484346	0.0399906
X	13517080	13851367	334288	-	ENSMUSG00000031012	Cask	protein_coding	calcium/calmodulin-dependent serine protein kinase (MAGUK family) [Source:MGI Symbol;Acc:MGI:1309489]	12361	-0.52119	2.88393	-2.83583	0.00489842	0.0402275
X	21028939	21062316	33378	-	ENSMUSG00000054737	Zfp182	protein_coding	zinc finger protein 182 [Source:MGI Symbol;Acc:MGI:2442220]	319535	-0.703472	1.27129	-2.77896	0.00575441	0.0449547
X	109004534	109013404	8871	-	ENSMUSG00000031245	Hmgn5	protein_coding	high-mobility group nucleosome binding domain 5 [Source:MGI Symbol;Acc:MGI:1355295]	50887	0.780284	3.74264	2.77402	0.00593049	0.0457358
X	101790053	101794423	4371	-	ENSMUSG00000045010	Gm4779	protein_coding	predicted gene 4779 [Source:MGI Symbol;Acc:MGI:3646776]	102634296	-1.54201	-0.850676	-2.81994	0.00643699	0.0481814
X	166499812	166518567	18756	-	ENSMUSG00000051224	Tceanc	protein_coding	transcription elongation factor A (SII) N-terminal and central domain containing [Source:MGI Symbol;Acc:MGI:2685236]	245695	-0.559883	4.08811	-2.7044	0.00663558	0.0490732
MT	8607	9390	784	+	ENSMUSG00000064358	mt-Co3	protein_coding	mitochondrially encoded cytochrome c oxidase III [Source:MGI Symbol;Acc:MGI:102502]	17710	-1.15265	2.56462	-5.84237	3.88092e-06	0.000766029
MT	9459	9806	348	+	ENSMUSG00000064360	mt-Nd3	protein_coding	mitochondrially encoded NADH dehydrogenase 3 [Source:MGI Symbol;Acc:MGI:102499]	17718	-1.47901	0.927547	-5.75678	4.91954e-06	0.000837197
MT	7927	8607	681	+	ENSMUSG00000064357	mt-Atp6	protein_coding	mitochondrially encoded ATP synthase 6 [Source:MGI Symbol;Acc:MGI:99927]	17705	-1.23098	3.07316	-5.3325	1.3062e-05	0.00138762
MT	7013	7696	684	+	ENSMUSG00000064354	mt-Co2	protein_coding	mitochondrially encoded cytochrome c oxidase II [Source:MGI Symbol;Acc:MGI:102503]	17709	-1.4045	2.70151	-5.0383	2.71377e-05	0.0019154
MT	9877	10173	297	+	ENSMUSG00000065947	mt-Nd4l	protein_coding	mitochondrially encoded NADH dehydrogenase 4L [Source:MGI Symbol;Acc:MGI:102497]	17720	-1.64126	-1.3255	-4.17631	0.000234142	0.00639879
MT	5328	6872	1545	+	ENSMUSG00000064351	mt-Co1	protein_coding	mitochondrially encoded cytochrome c oxidase I [Source:MGI Symbol;Acc:MGI:102504]	17708	-0.866872	13.0888	-3.31516	0.00167844	0.0200523
MT	10167	11544	1378	+	ENSMUSG00000064363	mt-Nd4	protein_coding	mitochondrially encoded NADH dehydrogenase 4 [Source:MGI Symbol;Acc:MGI:102498]	17719	-0.771628	10.8397	-2.71646	0.00676113	0.0497375
19	4855130	4860918	5789	+	ENSMUSG00000083282	Ctsf	protein_coding	cathepsin F [Source:MGI Symbol;Acc:MGI:1861434]	56464	-0.897553	4.67355	-7.82509	4.81251e-08	0.000174528
19	46501702	46516848	15147	+	ENSMUSG00000025034	Trim8	protein_coding	tripartite motif-containing 8 [Source:MGI Symbol;Acc:MGI:1933302]	93679	0.587997	6.24862	5.98139	2.73352e-06	0.000706661
19	28258851	28680077	421227	-	ENSMUSG00000052942	Glis3	protein_coding	GLIS family zinc finger 3 [Source:MGI Symbol;Acc:MGI:2444289]	226075	-0.909895	3.58631	-5.98504	2.73556e-06	0.000706661
19	47260174	47464401	204228	-	ENSMUSG00000053617	Sh3pxd2a	protein_coding	SH3 and PX domains 2A [Source:MGI Symbol;Acc:MGI:1298393]	14218	0.888836	6.85571	5.86727	3.5906e-06	0.000753338
19	38116629	38125281	8653	-	ENSMUSG00000024990	Rbp4	protein_coding	retinol binding protein 4, plasma [Source:MGI Symbol;Acc:MGI:97879]	19662	-1.74049	7.65127	-5.74486	5.23259e-06	0.000852578
19	53310518	53375810	65293	+	ENSMUSG00000025025	Mxi1	protein_coding	MAX interactor 1, dimerization protein [Source:MGI Symbol;Acc:MGI:97245]	17859	-0.595693	5.56759	-5.53976	7.65919e-06	0.00098612
19	41829970	41832583	2614	+	ENSMUSG00000067199	Frat1	protein_coding	frequently rearranged in advanced T cell lymphomas [Source:MGI Symbol;Acc:MGI:109450]	14296	-0.878262	2.12029	-5.48276	8.84502e-06	0.00108376
19	53140443	53247399	106957	+	ENSMUSG00000025026	Add3	protein_coding	adducin 3 (gamma) [Source:MGI Symbol;Acc:MGI:1351615]	27360	-0.742439	5.78667	-5.24204	1.55638e-05	0.00149811
19	23972750	24031019	58270	-	ENSMUSG00000071604	Fam189a2	protein_coding	family with sequence similarity 189, member A2 [Source:MGI Symbol;Acc:MGI:2685813]	381217	-1.14589	3.90216	-5.13396	2.08244e-05	0.00170642
19	5473954	5482517	8564	+	ENSMUSG00000024909	Efemp2	protein_coding	epidermal growth factor-containing fibulin-like extracellular matrix protein 2 [Source:MGI Symbol;Acc:MGI:1891209]	58859	-1.04	4.44681	-5.05899	2.46555e-05	0.00181622
19	38097071	38114263	17193	+	ENSMUSG00000054200	Ffar4	protein_coding	free fatty acid receptor 4 [Source:MGI Symbol;Acc:MGI:2147577]	107221	-1.203	0.0463596	-5.06407	2.4817e-05	0.00181622
19	23302609	23448442	145834	-	ENSMUSG00000033207	Mamdc2	protein_coding	MAM domain containing 2 [Source:MGI Symbol;Acc:MGI:1918988]	71738	-1.75592	3.86623	-5.03778	2.85821e-05	0.00198083
19	5070859	5085531	14673	-	ENSMUSG00000061451	Tmem151a	protein_coding	transmembrane protein 151A [Source:MGI Symbol;Acc:MGI:2147713]	381199	-1.50772	1.20964	-4.82711	4.60694e-05	0.00253812
19	45047503	45056383	8881	+	ENSMUSG00000025212	Sfxn3	protein_coding	sideroflexin 3 [Source:MGI Symbol;Acc:MGI:2137679]	94280	-1.00936	3.70964	-4.48273	9.95548e-05	0.00401258
19	28963953	28966811	2859	+	ENSMUSG00000040105	Plpp6	protein_coding	phospholipid phosphatase 6 [Source:MGI Symbol;Acc:MGI:1921661]	74411	-0.594042	4.25374	-4.42471	0.000110984	0.00418703
19	34550694	34576419	25726	+	ENSMUSG00000045932	Ifit2	protein_coding	interferon-induced protein with tetratricopeptide repeats 2 [Source:MGI Symbol;Acc:MGI:99449]	15958	-1.17038	3.02616	-4.43129	0.000115474	0.00426167
19	27216484	27254231	37748	+	ENSMUSG00000024924	Vldlr	protein_coding	very low density lipoprotein receptor [Source:MGI Symbol;Acc:MGI:98935]	22359	-1.06617	7.47765	-4.27435	0.000167107	0.0052447
19	46044886	46072915	28030	+	ENSMUSG00000055491	Pprc1	protein_coding	peroxisome proliferative activated receptor, gamma, coactivator-related 1 [Source:MGI Symbol;Acc:MGI:2385096]	226169	0.589124	5.50795	4.13576	0.000223716	0.00628194
19	53892231	53929860	37630	+	ENSMUSG00000024975	Pdcd4	protein_coding	programmed cell death 4 [Source:MGI Symbol;Acc:MGI:107490]	18569	0.799998	5.28305	4.13768	0.000225741	0.00628194
19	12466338	12501454	35117	-	ENSMUSG00000039982	Dtx4	protein_coding	deltex 4, E3 ubiquitin ligase [Source:MGI Symbol;Acc:MGI:2672905]	207521	-0.886853	2.47912	-4.08046	0.000262101	0.00669056
19	38481109	38785030	303922	+	ENSMUSG00000024998	Plce1	protein_coding	phospholipase C, epsilon 1 [Source:MGI Symbol;Acc:MGI:1921305]	74055	-1.07579	0.628893	-4.07143	0.000275421	0.00689272
19	9980598	9985098	4501	+	ENSMUSG00000024661	Fth1	protein_coding	ferritin heavy polypeptide 1 [Source:MGI Symbol;Acc:MGI:95588]	14319	-0.615592	10.4203	-3.89424	0.000402187	0.00865154
19	9109868	9135636	25769	-	ENSMUSG00000024654	Asrgl1	protein_coding	asparaginase like 1 [Source:MGI Symbol;Acc:MGI:1913764]	66514	-0.856605	2.1602	-3.89915	0.000406434	0.00867138
19	41482637	41586536	103900	+	ENSMUSG00000025019	Lcor	protein_coding	ligand dependent nuclear receptor corepressor [Source:MGI Symbol;Acc:MGI:2443930]	212391	0.62071	5.29356	3.79693	0.000509064	0.00994493
19	6046576	6053712	7137	+	ENSMUSG00000024807	Syvn1	protein_coding	synovial apoptosis inhibitor 1, synoviolin [Source:MGI Symbol;Acc:MGI:1921376]	74126	0.47707	7.78302	3.71906	0.000611026	0.0110594
19	43689672	43733697	44026	+	ENSMUSG00000025192	Entpd7	protein_coding	ectonucleoside triphosphate diphosphohydrolase 7 [Source:MGI Symbol;Acc:MGI:2135885]	93685	0.641019	3.62226	3.69969	0.00064463	0.0113615
19	3972328	3981646	9319	+	ENSMUSG00000075296	Aldh3b2	protein_coding	aldehyde dehydrogenase 3 family, member B2 [Source:MGI Symbol;Acc:MGI:2147613]	621603	0.567798	4.81992	3.67335	0.00068388	0.0117627
19	5988545	6015897	27353	-	ENSMUSG00000024942	Capn1	protein_coding	calpain 1 [Source:MGI Symbol;Acc:MGI:88263]	12333	0.529685	6.51473	3.6537	0.000715892	0.0120608
19	18631950	18652428	20479	+	ENSMUSG00000037847	Nmrk1	protein_coding	nicotinamide riboside kinase 1 [Source:MGI Symbol;Acc:MGI:2147434]	225994	0.593266	3.54389	3.60966	0.000798108	0.0127395
19	10668956	10678071	9116	-	ENSMUSG00000024738	Pga5	protein_coding	pepsinogen 5, group I [Source:MGI Symbol;Acc:MGI:1915935]	58803	-0.878481	4.84673	-3.62299	0.000798742	0.0127395
19	41845972	41848132	2161	-	ENSMUSG00000047604	Frat2	protein_coding	frequently rearranged in advanced T cell lymphomas 2 [Source:MGI Symbol;Acc:MGI:2673967]	212398	-0.754853	1.79794	-3.6056	0.000818243	0.0128932
19	17432319	17837632	405314	-	ENSMUSG00000024713	Pcsk5	protein_coding	proprotein convertase subtilisin/kexin type 5 [Source:MGI Symbol;Acc:MGI:97515]	18552	-1.25887	1.12665	-3.60435	0.000898929	0.0135035
19	61223957	61228429	4473	-	ENSMUSG00000059326	Csf2ra	protein_coding	colony stimulating factor 2 receptor, alpha, low-affinity (granulocyte-macrophage) [Source:MGI Symbol;Acc:MGI:1339754]	12982	0.467644	5.34358	3.5554	0.000904684	0.0135312
19	46329812	46338702	8891	-	ENSMUSG00000036748	Cuedc2	protein_coding	CUE domain containing 2 [Source:MGI Symbol;Acc:MGI:1914366]	67116	-0.56619	3.90626	-3.45793	0.00114595	0.0157978
19	30564489	31765033	1200545	-	ENSMUSG00000052920	Prkg1	protein_coding	protein kinase, cGMP-dependent, type I [Source:MGI Symbol;Acc:MGI:108174]	19091	-1.10624	1.64491	-3.38284	0.00149794	0.0188361
19	57032733	57314919	282187	-	ENSMUSG00000025085	Ablim1	protein_coding	actin-binding LIM protein 1 [Source:MGI Symbol;Acc:MGI:1194500]	226251	-0.921145	4.95411	-3.34521	0.00157807	0.019476
19	25505618	25604329	98712	+	ENSMUSG00000024837	Dmrt1	protein_coding	doublesex and mab-3 related transcription factor 1 [Source:MGI Symbol;Acc:MGI:1354733]	50796	-1.09651	0.866281	-3.35097	0.00161541	0.0196987
19	10605327	10629819	24493	+	ENSMUSG00000024740	Ddb1	protein_coding	damage specific DNA binding protein 1 [Source:MGI Symbol;Acc:MGI:1202384]	13194	0.4611	10.0159	3.20921	0.00205543	0.0229782
19	33555160	33761951	206792	-	ENSMUSG00000024766	Lipo3	protein_coding	lipase, member O3 [Source:MGI Symbol;Acc:MGI:2147592]	381236	-0.606642	2.61427	-3.1659	0.00229759	0.0245226
19	4040285	4046023	5739	-	ENSMUSG00000038155	Gstp2	protein_coding	glutathione S-transferase, pi 2 [Source:MGI Symbol;Acc:MGI:95864]	14869	-1.58872	-0.73515	-3.23026	0.00240716	0.0253041
19	42197971	42202252	4282	-	ENSMUSG00000018822	Sfrp5	protein_coding	secreted frizzled-related sequence protein 5 [Source:MGI Symbol;Acc:MGI:1860298]	54612	-1.01553	7.5032	-3.15871	0.00252646	0.0260574
19	8883732	8892627	8896	+	ENSMUSG00000096740	Lbhd1	protein_coding	LBH domain containing 1 [Source:MGI Symbol;Acc:MGI:5516029]	102308570	0.752553	0.99895	3.12005	0.00261677	0.0266554
19	16435762	16610820	175059	+	ENSMUSG00000024697	Gna14	protein_coding	guanine nucleotide binding protein, alpha 14 [Source:MGI Symbol;Acc:MGI:95769]	14675	0.927329	4.24267	3.08333	0.00296512	0.0290512
19	6227765	6235872	8108	-	ENSMUSG00000024777	Ppp2r5b	protein_coding	protein phosphatase 2, regulatory subunit B', beta [Source:MGI Symbol;Acc:MGI:2388480]	225849	-0.475735	3.46858	-3.03443	0.00309187	0.0299715
19	42593982	42612813	18832	-	ENSMUSG00000025185	Loxl4	protein_coding	lysyl oxidase-like 4 [Source:MGI Symbol;Acc:MGI:1914823]	67573	-1.68405	1.34221	-3.12251	0.00318762	0.0305135
19	37268743	37337852	69110	-	ENSMUSG00000056999	Ide	protein_coding	insulin degrading enzyme [Source:MGI Symbol;Acc:MGI:96412]	15925	0.551355	5.27408	3.0042	0.00333408	0.0313253
19	8837467	8848683	11217	+	ENSMUSG00000071657	Bscl2	protein_coding	Berardinelli-Seip congenital lipodystrophy 2 (seipin) [Source:MGI Symbol;Acc:MGI:1298392]	14705	-0.662152	4.46623	-2.9698	0.0036656	0.0333387
19	34290666	34327772	37107	+	ENSMUSG00000024778	Fas	protein_coding	Fas (TNF receptor superfamily member 6) [Source:MGI Symbol;Acc:MGI:95484]	14102	-0.996092	2.15544	-3.00056	0.00367449	0.0333997
19	30545863	30549665	3803	-	ENSMUSG00000024868	Dkk1	protein_coding	dickkopf WNT signaling pathway inhibitor 1 [Source:MGI Symbol;Acc:MGI:1329040]	13380	-1.08004	2.39356	-2.9984	0.0037721	0.0339245
19	4035407	4037985	2579	-	ENSMUSG00000060803	Gstp1	protein_coding	glutathione S-transferase, pi 1 [Source:MGI Symbol;Acc:MGI:95865]	14870	-0.543224	4.40726	-2.94984	0.0037782	0.0339595
19	9083636	9087958	4323	-	ENSMUSG00000024653	Scgb1a1	protein_coding	secretoglobin, family 1A, member 1 (uteroglobin) [Source:MGI Symbol;Acc:MGI:98919]	22287	-1.25709	2.25169	-2.98377	0.00407987	0.0356459
19	5877808	5885878	8071	+	ENSMUSG00000024818	Slc25a45	protein_coding	solute carrier family 25, member 45 [Source:MGI Symbol;Acc:MGI:2147731]	107375	-0.599074	1.30281	-2.87386	0.00453293	0.0383783
19	24674008	24682233	8226	+	ENSMUSG00000048572	Tmem252	protein_coding	transmembrane protein 252 [Source:MGI Symbol;Acc:MGI:3583948]	226040	-1.33658	1.9891	-2.92689	0.00476536	0.0396222
19	36917550	36919615	2066	-	ENSMUSG00000047632	Fgfbp3	protein_coding	fibroblast growth factor binding protein 3 [Source:MGI Symbol;Acc:MGI:1919764]	72514	-1.31873	1.94795	-2.91394	0.00489571	0.0402268
19	27322588	27337179	14592	+	ENSMUSG00000047298	Kcnv2	protein_coding	potassium channel, subfamily V, member 2 [Source:MGI Symbol;Acc:MGI:2670981]	240595	-0.686827	2.67588	-2.83061	0.00508851	0.041214
19	4261668	4269180	7513	-	ENSMUSG00000034616	Ssh3	protein_coding	slingshot protein phosphatase 3 [Source:MGI Symbol;Acc:MGI:2683546]	245857	-0.340733	4.41929	-2.76572	0.00569599	0.0446925
19	59458372	59465357	6986	+	ENSMUSG00000043969	Emx2	protein_coding	empty spiracles homeobox 2 [Source:MGI Symbol;Acc:MGI:95388]	13797	-1.20076	0.593838	-2.81532	0.00602179	0.0461841
19	56787481	56822190	34710	-	ENSMUSG00000035173	Ccdc186	protein_coding	coiled-coil domain containing 186 [Source:MGI Symbol;Acc:MGI:2445022]	213993	0.410771	5.34135	2.71497	0.0063919	0.0479659
19	6384399	6398459	14061	+	ENSMUSG00000032648	Pygm	protein_coding	muscle glycogen phosphorylase [Source:MGI Symbol;Acc:MGI:97830]	19309	-0.971072	-0.304452	-2.74303	0.00671749	0.0495593
18	13687013	13972787	285775	-	ENSMUSG00000024420	Zfp521	protein_coding	zinc finger protein 521 [Source:MGI Symbol;Acc:MGI:95459]	225207	-1.12006	0.306206	-5.54171	7.84455e-06	0.000992951
18	47235598	47368870	133273	-	ENSMUSG00000019647	Sema6a	protein_coding	sema domain, transmembrane domain (TM), and cytoplasmic domain, (semaphorin) 6A [Source:MGI Symbol;Acc:MGI:1203727]	20358	0.933536	5.0795	5.36484	1.17433e-05	0.00131285
18	38267089	38284402	17314	-	ENSMUSG00000024440	Pcdh12	protein_coding	protocadherin 12 [Source:MGI Symbol;Acc:MGI:1855700]	53601	1.10106	6.59566	4.92334	3.44484e-05	0.00216029
18	20030633	20059554	28922	-	ENSMUSG00000024331	Dsc2	protein_coding	desmocollin 2 [Source:MGI Symbol;Acc:MGI:103221]	13506	0.568185	7.40083	4.78389	4.65133e-05	0.00254066
18	31959234	32036961	77728	-	ENSMUSG00000024388	Myo7b	protein_coding	myosin VIIB [Source:MGI Symbol;Acc:MGI:107709]	17922	-1.26425	1.99456	-4.68313	6.31743e-05	0.00297716
18	80606205	80713071	106867	-	ENSMUSG00000033016	Nfatc1	protein_coding	nuclear factor of activated T cells, cytoplasmic, calcineurin dependent 1 [Source:MGI Symbol;Acc:MGI:102469]	18018	-0.799684	4.74035	-4.55957	8.0827e-05	0.00350693
18	4634878	4682869	47992	+	ENSMUSG00000033960	Jcad	protein_coding	junctional cadherin 5 associated [Source:MGI Symbol;Acc:MGI:2685174]	240185	-0.702178	7.2124	-4.29151	0.000154058	0.00506341
18	46713193	46728395	15203	-	ENSMUSG00000033022	Cdo1	protein_coding	cysteine dioxygenase 1, cytosolic [Source:MGI Symbol;Acc:MGI:105925]	12583	-1.43204	5.75583	-4.27748	0.00017595	0.00544146
18	80253292	80292725	39434	+	ENSMUSG00000034006	Slc66a2	protein_coding	solute carrier family 66 member 2 [Source:MGI Symbol;Acc:MGI:1914193]	66943	-0.629549	3.23719	-4.22142	0.000181988	0.00556962
18	36725067	36726798	1732	-	ENSMUSG00000051439	Cd14	protein_coding	CD14 antigen [Source:MGI Symbol;Acc:MGI:88318]	12475	-1.07472	2.6597	-4.13633	0.000234795	0.00639879
18	59175401	59535999	360599	+	ENSMUSG00000058152	Chsy3	protein_coding	chondroitin sulfate synthase 3 [Source:MGI Symbol;Acc:MGI:1926173]	78923	1.09433	3.46295	4.11205	0.000250005	0.00655175
18	32528322	32560034	31713	-	ENSMUSG00000090523	Gypc	protein_coding	glycophorin C [Source:MGI Symbol;Acc:MGI:1098566]	71683	-1.00685	2.03589	-4.04722	0.000289127	0.00706264
18	66045302	66302741	257440	-	ENSMUSG00000046318	Ccbe1	protein_coding	collagen and calcium binding EGF domains 1 [Source:MGI Symbol;Acc:MGI:2445053]	320924	-1.08501	4.68244	-3.91361	0.000406507	0.00867138
18	80046890	80119639	72750	+	ENSMUSG00000056214	Pard6g	protein_coding	par-6 family cell polarity regulator gamma [Source:MGI Symbol;Acc:MGI:2135606]	93737	0.827415	5.38016	3.83935	0.000468404	0.00943312
18	37694380	37841873	147494	+	ENSMUSG00000103567	Pcdhga5	protein_coding	protocadherin gamma subfamily A, 5 [Source:MGI Symbol;Acc:MGI:1935217]	93713	-1.11969	-0.155001	-3.78065	0.000567093	0.0106181
18	52516067	52529867	13801	-	ENSMUSG00000024529	Lox	protein_coding	lysyl oxidase [Source:MGI Symbol;Acc:MGI:96817]	16948	-1.48471	6.40924	-3.70918	0.000725334	0.0121203
18	82593593	82692883	99291	-	ENSMUSG00000041258	Zfp236	protein_coding	zinc finger protein 236 [Source:MGI Symbol;Acc:MGI:1926950]	329002	0.485587	4.75007	3.59161	0.000829875	0.0129626
18	22693181	23041653	348473	-	ENSMUSG00000041923	Nol4	protein_coding	nucleolar protein 4 [Source:MGI Symbol;Acc:MGI:2441684]	319211	3.39702	-2.60639	3.73023	0.000872357	0.0132824
18	46165300	46212607	47308	-	ENSMUSG00000033949	Trim36	protein_coding	tripartite motif-containing 36 [Source:MGI Symbol;Acc:MGI:106264]	28105	0.807517	1.62933	3.53412	0.00097967	0.0142901
18	78100091	78142119	42029	-	ENSMUSG00000059336	Slc14a1	protein_coding	solute carrier family 14 (urea transporter), member 1 [Source:MGI Symbol;Acc:MGI:1351654]	108052	-0.90406	1.85001	-3.42444	0.00129861	0.016963
18	37661793	37841873	180081	+	ENSMUSG00000103144	Pcdhga1	protein_coding	protocadherin gamma subfamily A, 1 [Source:MGI Symbol;Acc:MGI:1935212]	93709	-1.29237	-0.912499	-3.42183	0.00141727	0.0179991
18	67390717	67402749	12033	+	ENSMUSG00000001473	Tubb6	protein_coding	tubulin, beta 6 class V [Source:MGI Symbol;Acc:MGI:1915201]	67951	-0.597803	4.83741	-3.319	0.0015986	0.0195816
18	24653691	24701575	47885	+	ENSMUSG00000039616	Mocos	protein_coding	molybdenum cofactor sulfurase [Source:MGI Symbol;Acc:MGI:1915841]	68591	-0.760117	2.645	-3.32708	0.00160029	0.0195816
18	52767709	52915935	148227	+	ENSMUSG00000024534	Sncaip	protein_coding	synuclein, alpha interacting protein (synphilin) [Source:MGI Symbol;Acc:MGI:1915097]	67847	-0.902097	0.404092	-3.29963	0.00175469	0.0207047
18	35733679	35740554	6876	-	ENSMUSG00000024349	Sting1	protein_coding	stimulator of interferon response cGAMP interactor 1 [Source:MGI Symbol;Acc:MGI:1919762]	72512	-1.00679	2.53907	-3.17724	0.00241124	0.0253123
18	67933257	68268630	335374	+	ENSMUSG00000024544	Ldlrad4	protein_coding	low density lipoprotein receptor class A domain containing 4 [Source:MGI Symbol;Acc:MGI:1277150]	52662	-0.911901	0.948774	-3.1337	0.00261925	0.0266554
18	69979131	70141605	162475	-	ENSMUSG00000024511	Rab27b	protein_coding	RAB27B, member RAS oncogene family [Source:MGI Symbol;Acc:MGI:1931295]	80718	-0.956975	2.82367	-3.12326	0.00271366	0.0272257
18	70647149	70648037	889	-	ENSMUSG00000117810	Gm8934	processed_pseudogene	predicted gene 8934 [Source:MGI Symbol;Acc:MGI:3643402]	NA	-0.990427	-1.27435	-3.11616	0.00278209	0.0276692
18	58556257	58612773	56517	+	ENSMUSG00000024600	Slc27a6	protein_coding	solute carrier family 27 (fatty acid transporter), member 6 [Source:MGI Symbol;Acc:MGI:3036230]	225579	0.485407	5.83406	3.03242	0.00310781	0.030031
18	35713086	35722356	9271	-	ENSMUSG00000073599	Ecscr	protein_coding	endothelial cell surface expressed chemotaxis and apoptosis regulator [Source:MGI Symbol;Acc:MGI:1915795]	68545	-0.907777	2.45361	-3.01974	0.00343452	0.0319582
18	75514645	75522806	8162	+	ENSMUSG00000097712	Gm10532	antisense	predicted gene 10532 [Source:MGI Symbol;Acc:MGI:3641671]	NA	-0.909053	0.926011	-2.98654	0.00371774	0.0336133
18	37751600	37841873	90274	+	ENSMUSG00000104063	Pcdhgb7	protein_coding	protocadherin gamma subfamily B, 7 [Source:MGI Symbol;Acc:MGI:1935199]	93704	-0.775631	0.555055	-2.88438	0.00457998	0.0386485
18	37731009	37841873	110865	+	ENSMUSG00000103749	Pcdhgb5	protein_coding	protocadherin gamma subfamily B, 5 [Source:MGI Symbol;Acc:MGI:1935196]	93702	-0.739281	0.67965	-2.83708	0.00507106	0.0411161
18	4920540	5119299	198760	+	ENSMUSG00000024236	Svil	protein_coding	supervillin [Source:MGI Symbol;Acc:MGI:2147319]	225115	-0.494474	3.76591	-2.81737	0.00509669	0.0412584
18	23415135	23659715	244581	+	ENSMUSG00000024302	Dtna	protein_coding	dystrobrevin alpha [Source:MGI Symbol;Acc:MGI:106039]	13527	-1.01176	4.40538	-2.86281	0.00512041	0.041363
18	64452914	64490251	37338	-	ENSMUSG00000024588	Fech	protein_coding	ferrochelatase [Source:MGI Symbol;Acc:MGI:95513]	14151	-0.795746	6.73027	-2.8287	0.005242	0.0421009
18	37517871	37524479	6609	+	ENSMUSG00000073591	Pcdhb22	protein_coding	protocadherin beta 22 [Source:MGI Symbol;Acc:MGI:2136760]	93893	-1.10915	-1.10423	-2.82056	0.00580822	0.0452092
18	64693536	64700054	6519	-	ENSMUSG00000118356	Gm50353	lincRNA	predicted gene, 50353 [Source:MGI Symbol;Acc:MGI:6303236]	NA	-1.65939	0.987553	-2.86809	0.00586855	0.0454183
18	34859823	34864984	5162	+	ENSMUSG00000038418	Egr1	protein_coding	early growth response 1 [Source:MGI Symbol;Acc:MGI:95295]	13653	-0.741686	2.40309	-2.75729	0.00610505	0.0467058
18	60474191	60501987	27797	-	ENSMUSG00000038059	Smim3	protein_coding	small integral membrane protein 3 [Source:MGI Symbol;Acc:MGI:1917088]	106878	-0.731517	2.07162	-2.7535	0.00614342	0.0468122
18	44380502	44424969	44468	+	ENSMUSG00000024472	Dcp2	protein_coding	decapping mRNA 2 [Source:MGI Symbol;Acc:MGI:1917890]	70640	0.419142	5.04539	2.71353	0.00641464	0.0480894
18	34442351	34506831	64481	-	ENSMUSG00000036501	Fam13b	protein_coding	family with sequence similarity 13, member B [Source:MGI Symbol;Acc:MGI:2447834]	225358	0.564505	3.85755	2.70357	0.00665281	0.049139
17	15367354	15376872	9519	-	ENSMUSG00000014773	Dll1	protein_coding	delta like canonical Notch ligand 1 [Source:MGI Symbol;Acc:MGI:104659]	13388	-1.14914	3.41223	-5.39349	1.1188e-05	0.00127877
17	36029773	36032855	3083	-	ENSMUSG00000067212	H2-T23	protein_coding	histocompatibility 2, T region locus 23 [Source:MGI Symbol;Acc:MGI:95957]	15040	-1.24108	5.48832	-5.29187	1.44137e-05	0.00146199
17	35199381	35202007	2627	-	ENSMUSG00000024401	Tnf	protein_coding	tumor necrosis factor [Source:MGI Symbol;Acc:MGI:104798]	21926	-1.92792	0.25813	-5.24094	1.78862e-05	0.00160202
17	28896392	28915324	18933	-	ENSMUSG00000048905	Bnip5	protein_coding	BCL2 interacting protein 5 [Source:MGI Symbol;Acc:MGI:1925441]	207819	-1.00629	1.70947	-5.13177	2.06264e-05	0.00170642
17	57249455	57263665	14211	+	ENSMUSG00000019487	Trip10	protein_coding	thyroid hormone receptor interactor 10 [Source:MGI Symbol;Acc:MGI:2146901]	106628	-0.756914	3.28316	-4.88584	3.65946e-05	0.00221535
17	24937419	24960689	23271	-	ENSMUSG00000024165	Jpt2	protein_coding	Jupiter microtubule associated homolog 2 [Source:MGI Symbol;Acc:MGI:1196260]	52009	0.574996	6.65097	4.84261	4.03775e-05	0.00235612
17	3326573	3531344	204772	+	ENSMUSG00000023800	Tiam2	protein_coding	T cell lymphoma invasion and metastasis 2 [Source:MGI Symbol;Acc:MGI:1344338]	24001	2.09072	2.99507	4.86422	4.57771e-05	0.0025346
17	86963082	87000069	36988	+	ENSMUSG00000024143	Rhoq	protein_coding	ras homolog family member Q [Source:MGI Symbol;Acc:MGI:1931553]	104215	-0.895594	4.99306	-4.74304	5.21889e-05	0.0026823
17	56303321	56323486	20166	+	ENSMUSG00000001228	Uhrf1	protein_coding	ubiquitin-like, containing PHD and RING finger domains, 1 [Source:MGI Symbol;Acc:MGI:1338889]	18140	0.919486	2.46235	4.62342	6.99379e-05	0.00319752
17	45585200	45599606	14407	-	ENSMUSG00000023942	Slc29a1	protein_coding	solute carrier family 29 (nucleoside transporters), member 1 [Source:MGI Symbol;Acc:MGI:1927073]	63959	0.644286	6.34363	4.59358	7.38134e-05	0.00334784
17	8525372	8986648	461277	+	ENSMUSG00000023868	Pde10a	protein_coding	phosphodiesterase 10A [Source:MGI Symbol;Acc:MGI:1345143]	23984	0.556405	7.26215	4.49724	9.30141e-05	0.00388819
17	27057304	27122223	64920	+	ENSMUSG00000042644	Itpr3	protein_coding	inositol 1,4,5-triphosphate receptor 3 [Source:MGI Symbol;Acc:MGI:96624]	16440	-1.07694	4.34265	-4.51002	9.39556e-05	0.0038935
17	34950238	34952471	2234	-	ENSMUSG00000092203	1110038B12Rik	processed_transcript	RIKEN cDNA 1110038B12 gene [Source:MGI Symbol;Acc:MGI:1916013]	NA	-0.781077	1.70174	-4.44445	0.000106774	0.00416107
17	47726842	47734482	7641	+	ENSMUSG00000023987	Pgc	protein_coding	progastricsin (pepsinogen C) [Source:MGI Symbol;Acc:MGI:98909]	109820	-1.34336	5.66543	-4.4463	0.000114341	0.00424031
17	27143965	27167795	23831	-	ENSMUSG00000024210	Ip6k3	protein_coding	inositol hexaphosphate kinase 3 [Source:MGI Symbol;Acc:MGI:3045325]	271424	-1.29536	-0.335651	-4.18409	0.000216513	0.00614678
17	83350931	83480361	129431	+	ENSMUSG00000032624	Eml4	protein_coding	echinoderm microtubule associated protein like 4 [Source:MGI Symbol;Acc:MGI:1926048]	78798	0.465115	5.92091	4.14791	0.000216719	0.00614678
17	35379617	35385290	5674	+	ENSMUSG00000035929	H2-Q4	protein_coding	histocompatibility 2, Q region locus 4 [Source:MGI Symbol;Acc:MGI:95933]	15015	-1.54917	3.35571	-4.12251	0.000263432	0.00671336
17	75005568	75392512	386945	+	ENSMUSG00000001870	Ltbp1	protein_coding	latent transforming growth factor beta binding protein 1 [Source:MGI Symbol;Acc:MGI:109151]	268977	-0.719042	3.41395	-4.06278	0.000268978	0.00678173
17	71615895	71659031	43137	+	ENSMUSG00000041057	Wdr43	protein_coding	WD repeat domain 43 [Source:MGI Symbol;Acc:MGI:1919765]	72515	0.484287	4.68872	4.04246	0.000279855	0.00697639
17	79051906	79090378	38473	+	ENSMUSG00000024084	Qpct	protein_coding	glutaminyl-peptide cyclotransferase (glutaminyl cyclase) [Source:MGI Symbol;Acc:MGI:1917786]	70536	-1.41885	5.7269	-3.98562	0.000361427	0.00811673
17	46500572	46546388	45817	-	ENSMUSG00000040327	Cul9	protein_coding	cullin 9 [Source:MGI Symbol;Acc:MGI:1925559]	78309	-0.876022	1.96303	-3.94246	0.000366627	0.00818551
17	48346401	48354147	7747	+	ENSMUSG00000023992	Trem2	protein_coding	triggering receptor expressed on myeloid cells 2 [Source:MGI Symbol;Acc:MGI:1913150]	83433	-1.52251	4.2563	-3.97187	0.000380945	0.00839504
17	35821684	35822923	1240	+	ENSMUSG00000003541	Ier3	protein_coding	immediate early response 3 [Source:MGI Symbol;Acc:MGI:104814]	15937	-0.826926	5.66109	-3.77716	0.000544897	0.0103416
17	56551414	56554387	2974	-	ENSMUSG00000110218	Gm20219	protein_coding	predicted gene, 20219 [Source:MGI Symbol;Acc:MGI:5012404]	NA	1.77885	-0.678477	3.81673	0.0005852	0.0107857
17	24073680	24150924	77245	-	ENSMUSG00000024122	Pdpk1	protein_coding	3-phosphoinositide dependent protein kinase 1 [Source:MGI Symbol;Acc:MGI:1338068]	18607	0.559388	5.62329	3.70004	0.000641107	0.0113124
17	35865593	35875596	10004	+	ENSMUSG00000034595	Ppp1r18	protein_coding	protein phosphatase 1, regulatory subunit 18 [Source:MGI Symbol;Acc:MGI:1923698]	76448	0.512968	5.74831	3.69615	0.000646135	0.011375
17	80944632	81001816	57185	+	ENSMUSG00000024245	Tmem178	protein_coding	transmembrane protein 178 [Source:MGI Symbol;Acc:MGI:1915277]	68027	-1.34727	1.19037	-3.74137	0.000652519	0.0114087
17	24222198	24251484	29287	-	ENSMUSG00000072082	Ccnf	protein_coding	cyclin F [Source:MGI Symbol;Acc:MGI:102551]	12449	0.560731	4.14992	3.64769	0.000727173	0.0121203
17	49992257	50190674	198418	-	ENSMUSG00000039316	Rftn1	protein_coding	raftlin lipid raft linker 1 [Source:MGI Symbol;Acc:MGI:1923688]	76438	-0.91086	3.35699	-3.64438	0.000762323	0.0124475
17	25057702	25083591	25890	-	ENSMUSG00000024168	Tmem204	protein_coding	transmembrane protein 204 [Source:MGI Symbol;Acc:MGI:3039635]	407831	-1.05652	2.89719	-3.61451	0.000842085	0.0130938
17	68826623	68843139	16517	+	ENSMUSG00000095407	Tmem200c	protein_coding	transmembrane protein 200C [Source:MGI Symbol;Acc:MGI:3646281]	622645	-1.84588	-1.05581	-3.66182	0.000869154	0.0132721
17	48447907	48451522	3616	-	ENSMUSG00000023995	Tspo2	protein_coding	translocator protein 2 [Source:MGI Symbol;Acc:MGI:1917276]	70026	-1.76111	0.373683	-3.57576	0.00106067	0.0150401
17	84183931	84187947	4017	-	ENSMUSG00000045817	Zfp36l2	protein_coding	zinc finger protein 36, C3H type-like 2 [Source:MGI Symbol;Acc:MGI:107945]	12193	0.490234	6.09129	3.46718	0.00111732	0.0155431
17	73804134	73832094	27961	+	ENSMUSG00000024065	Ehd3	protein_coding	EH-domain containing 3 [Source:MGI Symbol;Acc:MGI:1928900]	57440	-0.632443	4.14909	-3.4565	0.00115552	0.0158893
17	29317680	29330593	12914	+	ENSMUSG00000024011	Pi16	protein_coding	peptidase inhibitor 16 [Source:MGI Symbol;Acc:MGI:1921366]	74116	1.18452	1.04748	3.49379	0.00116141	0.0159135
17	36037128	36042747	5620	-	ENSMUSG00000056116	H2-T22	protein_coding	histocompatibility 2, T region locus 22 [Source:MGI Symbol;Acc:MGI:95956]	c(15039, 15051)	-1.15295	4.57048	-3.45734	0.00126139	0.0167302
17	83501918	83517330	15413	-	ENSMUSG00000024248	Cox7a2l	protein_coding	cytochrome c oxidase subunit 7A2 like [Source:MGI Symbol;Acc:MGI:106015]	20463	-0.405533	7.03421	-3.3919	0.00133438	0.0173101
17	28801090	28839949	38860	+	ENSMUSG00000063952	Brpf3	protein_coding	bromodomain and PHD finger containing, 3 [Source:MGI Symbol;Acc:MGI:2146836]	268936	0.563019	6.00602	3.39018	0.00134642	0.017417
17	47599331	47611492	12162	-	ENSMUSG00000023988	Bysl	protein_coding	bystin-like [Source:MGI Symbol;Acc:MGI:1858419]	53414	0.431749	4.38481	3.37815	0.00137898	0.0177186
17	26414829	26446349	31521	+	ENSMUSG00000034413	Neurl1b	protein_coding	neuralized E3 ubiquitin protein ligase 1B [Source:MGI Symbol;Acc:MGI:3643092]	240055	1.81599	0.531746	3.46522	0.00140696	0.0179426
17	43568098	43612201	44104	+	ENSMUSG00000023913	Pla2g7	protein_coding	phospholipase A2, group VII (platelet-activating factor acetylhydrolase, plasma) [Source:MGI Symbol;Acc:MGI:1351327]	27226	-1.12314	8.59186	-3.39873	0.00144629	0.0182777
17	44134768	44280172	145405	+	ENSMUSG00000023959	Clic5	protein_coding	chloride intracellular channel 5 [Source:MGI Symbol;Acc:MGI:1917912]	224796	-0.575593	7.66076	-3.35742	0.00145668	0.0183929
17	34112023	34122634	10612	-	ENSMUSG00000024335	Brd2	protein_coding	bromodomain containing 2 [Source:MGI Symbol;Acc:MGI:99495]	14312	0.390211	7.42149	3.31968	0.00158294	0.0195047
17	31677807	31681733	3927	+	ENSMUSG00000024041	Cryaa	protein_coding	crystallin, alpha A [Source:MGI Symbol;Acc:MGI:88515]	12954	-1.21605	3.95168	-3.3551	0.00164165	0.0198445
17	25844771	25861501	16731	-	ENSMUSG00000073434	Wdr90	protein_coding	WD repeat domain 90 [Source:MGI Symbol;Acc:MGI:1921267]	106618	0.635075	1.2429	3.25406	0.00187162	0.0216182
17	7170115	7303315	133201	+	ENSMUSG00000023809	Rps6ka2	protein_coding	ribosomal protein S6 kinase, polypeptide 2 [Source:MGI Symbol;Acc:MGI:1342290]	20112	0.56178	5.73367	3.24157	0.0019145	0.0219809
17	14279506	14404790	125285	+	ENSMUSG00000023886	Smoc2	protein_coding	SPARC related modular calcium binding 2 [Source:MGI Symbol;Acc:MGI:1929881]	64074	-1.08949	5.4895	-3.27124	0.00195769	0.0222598
17	57021051	57031522	10472	-	ENSMUSG00000007670	Khsrp	protein_coding	KH-type splicing regulatory protein [Source:MGI Symbol;Acc:MGI:1336214]	16549	0.445039	5.69215	3.22752	0.00196813	0.02235
17	56775897	56831013	55117	-	ENSMUSG00000024206	Rfx2	protein_coding	regulatory factor X, 2 (influences HLA class II expression) [Source:MGI Symbol;Acc:MGI:106583]	19725	-0.987756	2.52734	-3.22132	0.00215874	0.0235932
17	71252172	71311978	59807	-	ENSMUSG00000024053	Emilin2	protein_coding	elastin microfibril interfacer 2 [Source:MGI Symbol;Acc:MGI:2389136]	246707	-1.1142	6.80027	-3.21481	0.00225742	0.0242799
17	86167785	86657919	490135	+	ENSMUSG00000045038	Prkce	protein_coding	protein kinase C, epsilon [Source:MGI Symbol;Acc:MGI:97599]	18754	0.409612	5.70471	3.15583	0.00232662	0.0247633
17	34564268	34588503	24236	+	ENSMUSG00000015468	Notch4	protein_coding	notch 4 [Source:MGI Symbol;Acc:MGI:107471]	18132	-0.881268	3.96482	-3.1414	0.0025539	0.026222
17	65651729	65772752	121024	-	ENSMUSG00000056515	Rab31	protein_coding	RAB31, member RAS oncogene family [Source:MGI Symbol;Acc:MGI:1914603]	106572	-0.690396	6.67792	-3.12362	0.00256697	0.0262982
17	35062693	35066184	3492	-	ENSMUSG00000073414	Mpig6b	protein_coding	megakaryocyte and platelet inhibitory receptor G6b [Source:MGI Symbol;Acc:MGI:2146995]	106722	-1.0012	-0.0322499	-3.12685	0.00271852	0.0272257
17	56162477	56173955	11479	+	ENSMUSG00000044469	Tnfaip8l1	protein_coding	tumor necrosis factor, alpha-induced protein 8-like 1 [Source:MGI Symbol;Acc:MGI:1913693]	66443	0.519776	3.07724	3.08265	0.002771	0.0275947
17	81373105	81738377	365273	-	ENSMUSG00000054640	Slc8a1	protein_coding	solute carrier family 8 (sodium/calcium exchanger), member 1 [Source:MGI Symbol;Acc:MGI:107956]	20541	-1.01571	1.34504	-3.06526	0.00316272	0.030332
17	34616662	34628510	11849	-	ENSMUSG00000015474	Ppt2	protein_coding	palmitoyl-protein thioesterase 2 [Source:MGI Symbol;Acc:MGI:1860075]	54397	-0.833317	3.31476	-3.03468	0.00325754	0.0309699
17	35065388	35070050	4663	+	ENSMUSG00000092586	Ly6g6c	protein_coding	lymphocyte antigen 6 complex, locus G6C [Source:MGI Symbol;Acc:MGI:2148930]	68468	-1.68205	3.7773	-3.07005	0.00361995	0.0331228
17	28558149	28560766	2618	-	ENSMUSG00000024225	Clps	protein_coding	colipase, pancreatic [Source:MGI Symbol;Acc:MGI:88421]	109791	1.02892	3.36673	2.93101	0.00437384	0.0374639
17	7362815	7385464	22650	-	ENSMUSG00000056133	Unc93a2	protein_coding	unc-93 homolog A2 [Source:MGI Symbol;Acc:MGI:3712668]	667055	-1.25398	1.86203	-2.90899	0.00487871	0.0401733
17	43016555	43089189	72635	+	ENSMUSG00000023915	Tnfrsf21	protein_coding	tumor necrosis factor receptor superfamily, member 21 [Source:MGI Symbol;Acc:MGI:2151075]	94185	-0.576078	5.70936	-2.81517	0.0051695	0.0416278
17	6042196	6079741	37546	-	ENSMUSG00000015659	Serac1	protein_coding	serine active site containing 1 [Source:MGI Symbol;Acc:MGI:2447813]	321007	0.665115	1.47363	2.81611	0.00523851	0.042095
17	44096308	44105809	9502	-	ENSMUSG00000023961	Enpp4	protein_coding	ectonucleotide pyrophosphatase/phosphodiesterase 4 [Source:MGI Symbol;Acc:MGI:2682634]	224794	-0.588581	1.72077	-2.79889	0.00537579	0.0428163
17	69383050	69391199	8150	+	ENSMUSG00000049672	Zbtb14	protein_coding	zinc finger and BTB domain containing 14 [Source:MGI Symbol;Acc:MGI:1195345]	22666	0.403199	3.9852	2.78096	0.00550876	0.0435886
17	7350885	7352696	1812	-	ENSMUSG00000079722	Ttll2	protein_coding	tubulin tyrosine ligase-like family, member 2 [Source:MGI Symbol;Acc:MGI:3644030]	100216474	-0.945016	-1.13785	-2.81899	0.00557813	0.0439027
17	37045966	37075067	29102	+	ENSMUSG00000024462	Gabbr1	protein_coding	gamma-aminobutyric acid (GABA) B receptor, 1 [Source:MGI Symbol;Acc:MGI:1860139]	54393	-1.03872	1.5293	-2.82303	0.00566713	0.0445573
17	39848103	39848827	725	-	ENSMUSG00000118642	CT010467.2	pseudogene	NULL	NA	-0.77049	3.48958	-2.7701	0.00596968	0.0458993
17	70844205	70853546	9342	-	ENSMUSG00000047407	Tgif1	protein_coding	TGFB-induced factor homeobox 1 [Source:MGI Symbol;Acc:MGI:1194497]	21815	-0.544117	5.3279	-2.74649	0.00601868	0.0461834
17	13482553	13668891	186339	-	ENSMUSG00000117042	2700054A10Rik	lincRNA	RIKEN cDNA 2700054A10 gene [Source:MGI Symbol;Acc:MGI:1919828]	NA	-0.881348	-1.12435	-2.76258	0.00625786	0.0473744
17	57105325	57107757	2433	+	ENSMUSG00000035678	Tnfsf9	protein_coding	tumor necrosis factor (ligand) superfamily, member 9 [Source:MGI Symbol;Acc:MGI:1101058]	21950	-1.03337	2.06143	-2.77037	0.00640875	0.0480688
17	24639286	24650327	11042	-	ENSMUSG00000002504	Slc9a3r2	protein_coding	solute carrier family 9 (sodium/hydrogen exchanger), member 3 regulator 2 [Source:MGI Symbol;Acc:MGI:1890662]	65962	-0.937918	4.32895	-2.75272	0.00650561	0.0485287
17	29687357	29717044	29688	-	ENSMUSG00000024018	Ccdc167	protein_coding	coiled-coil domain containing 167 [Source:MGI Symbol;Acc:MGI:1915847]	68597	0.750003	0.608979	2.72268	0.00662716	0.0490583
16	17233572	17263430	29859	+	ENSMUSG00000050240	Hic2	protein_coding	hypermethylated in cancer 2 [Source:MGI Symbol;Acc:MGI:1929869]	58180	0.695411	7.02381	6.28032	1.37961e-06	0.00051537
16	85793827	85803113	9287	-	ENSMUSG00000022893	Adamts1	protein_coding	a disintegrin-like and metallopeptidase (reprolysin type) with thrombospondin type 1 motif, 1 [Source:MGI Symbol;Acc:MGI:109249]	11504	-1.32819	5.31802	-5.8196	4.16923e-06	0.000778732
16	17489611	17507485	17875	+	ENSMUSG00000022763	Aifm3	protein_coding	apoptosis-inducing factor, mitochondrion-associated 3 [Source:MGI Symbol;Acc:MGI:1919418]	72168	-1.05086	2.61208	-5.60878	6.65216e-06	0.000943374
16	26356642	26371841	15200	-	ENSMUSG00000022512	Cldn1	protein_coding	claudin 1 [Source:MGI Symbol;Acc:MGI:1276109]	12737	-1.50241	5.72156	-5.5523	8.00259e-06	0.00100465
16	38558698	38592162	33465	+	ENSMUSG00000002845	Tmem39a	protein_coding	transmembrane protein 39a [Source:MGI Symbol;Acc:MGI:1915096]	67846	0.511131	5.88119	5.05918	2.39822e-05	0.00181622
16	23224740	23360350	135611	+	ENSMUSG00000022885	St6gal1	protein_coding	beta galactoside alpha 2,6 sialyltransferase 1 [Source:MGI Symbol;Acc:MGI:108470]	20440	0.688548	7.98375	5.04476	2.49005e-05	0.00181622
16	90386013	90499553	113541	+	ENSMUSG00000053414	Hunk	protein_coding	hormonally upregulated Neu-associated kinase [Source:MGI Symbol;Acc:MGI:1347352]	26559	0.92219	4.00444	4.94273	3.22689e-05	0.0020766
16	95702075	95721051	18977	+	ENSMUSG00000022895	Ets2	protein_coding	E26 avian leukemia oncogene 2, 3' domain [Source:MGI Symbol;Acc:MGI:95456]	23872	0.591202	8.72437	4.5759	7.69305e-05	0.00340667
16	4639989	4707695	67707	+	ENSMUSG00000004069	Dnaja3	protein_coding	DnaJ heat shock protein family (Hsp40) member A3 [Source:MGI Symbol;Acc:MGI:1933786]	83945	0.533233	5.0801	4.43768	0.000107419	0.00416182
16	90826719	90905109	78391	+	ENSMUSG00000039903	Eva1c	protein_coding	eva-1 homolog C (C. elegans) [Source:MGI Symbol;Acc:MGI:1918217]	70967	-1.47027	4.51494	-4.40367	0.000129655	0.00456506
16	11060945	11074985	14041	+	ENSMUSG00000037972	Snn	protein_coding	stannin [Source:MGI Symbol;Acc:MGI:1276549]	20621	-0.662401	3.20285	-4.32382	0.000142122	0.00479459
16	20733127	20742384	9258	+	ENSMUSG00000006958	Chrd	protein_coding	chordin [Source:MGI Symbol;Acc:MGI:1313268]	12667	-1.50909	2.56475	-4.16659	0.000234553	0.00639879
16	44485049	44558897	73849	-	ENSMUSG00000022687	Boc	protein_coding	biregional cell adhesion molecule-related/down-regulated by oncogenes (Cdon) binding protein [Source:MGI Symbol;Acc:MGI:2151153]	117606	-1.0612	2.2053	-4.10129	0.000255348	0.00661746
16	89787111	90143769	356659	-	ENSMUSG00000002489	Tiam1	protein_coding	T cell lymphoma invasion and metastasis 1 [Source:MGI Symbol;Acc:MGI:103306]	21844	1.02428	4.64749	4.07553	0.000270458	0.00679206
16	16365184	16366157	974	-	ENSMUSG00000098037	Gm7765	processed_pseudogene	predicted gene 7765 [Source:MGI Symbol;Acc:MGI:3645843]	NA	1.24759	-0.0702031	4.05972	0.00029186	0.00711557
16	15887286	15891031	3746	+	ENSMUSG00000071637	Cebpd	protein_coding	CCAAT/enhancer binding protein (C/EBP), delta [Source:MGI Symbol;Acc:MGI:103573]	12609	-1.21571	3.53766	-4.00865	0.000329187	0.00770921
16	16416917	16600549	183633	-	ENSMUSG00000022788	Fgd4	protein_coding	FYVE, RhoGEF and PH domain containing 4 [Source:MGI Symbol;Acc:MGI:2183747]	224014	0.622076	4.59436	3.97254	0.000332809	0.00775845
16	21649045	21694665	45621	-	ENSMUSG00000043391	2510009E07Rik	protein_coding	RIKEN cDNA 2510009E07 gene [Source:MGI Symbol;Acc:MGI:1919440]	72190	-0.737206	3.74469	-3.87586	0.000424288	0.00892636
16	85856173	85901828	45656	-	ENSMUSG00000022894	Adamts5	protein_coding	a disintegrin-like and metallopeptidase (reprolysin type) with thrombospondin type 1 motif, 5 (aggrecanase-2) [Source:MGI Symbol;Acc:MGI:1346321]	23794	-1.14719	5.71719	-3.89128	0.000434205	0.00902199
16	5211823	5222299	10477	-	ENSMUSG00000051669	AU021092	protein_coding	expressed sequence AU021092 [Source:MGI Symbol;Acc:MGI:2146559]	239691	-1.02868	3.45668	-3.84832	0.000472534	0.00947295
16	78540338	78576708	36371	-	ENSMUSG00000022864	D16Ertd472e	protein_coding	DNA segment, Chr 16, ERATO Doi 472, expressed [Source:MGI Symbol;Acc:MGI:1196400]	67102	0.667636	3.4854	3.81675	0.000486753	0.00965687
16	72308306	73046095	737790	+	ENSMUSG00000022883	Robo1	protein_coding	roundabout guidance receptor 1 [Source:MGI Symbol;Acc:MGI:1274781]	19876	-0.700661	3.41641	-3.78435	0.000527905	0.0101194
16	12704368	12706740	2373	+	ENSMUSG00000116197	Gm38619	lincRNA	predicted gene, 38619 [Source:MGI Symbol;Acc:MGI:5621504]	NA	3.18884	-1.7647	3.89751	0.000566768	0.0106181
16	16213318	16272712	59395	+	ENSMUSG00000041957	Pkp2	protein_coding	plakophilin 2 [Source:MGI Symbol;Acc:MGI:1914701]	67451	0.473078	6.9259	3.73305	0.00059076	0.0108342
16	17759618	17793382	33765	+	ENSMUSG00000022750	Klhl22	protein_coding	kelch-like 22 [Source:MGI Symbol;Acc:MGI:1337995]	224023	0.384425	6.2794	3.68034	0.000670101	0.0116496
16	38396117	38433145	37029	-	ENSMUSG00000002847	Pla1a	protein_coding	phospholipase A1 member A [Source:MGI Symbol;Acc:MGI:1934677]	85031	-1.40395	4.97902	-3.70693	0.000718272	0.0120626
16	17130138	17132383	2246	-	ENSMUSG00000022769	Sdf2l1	protein_coding	stromal cell-derived factor 2-like 1 [Source:MGI Symbol;Acc:MGI:2149842]	64136	0.604694	6.5501	3.64862	0.000727247	0.0121203
16	26581704	26730117	148414	+	ENSMUSG00000022514	Il1rap	protein_coding	interleukin 1 receptor accessory protein [Source:MGI Symbol;Acc:MGI:104975]	16180	-0.604457	3.11225	-3.50775	0.00101983	0.0147267
16	17139064	17147229	8166	-	ENSMUSG00000022768	Ccdc116	protein_coding	coiled-coil domain containing 116 [Source:MGI Symbol;Acc:MGI:1924122]	76872	1.87509	-1.218	3.56488	0.00111039	0.0154789
16	4726361	4766742	40382	+	ENSMUSG00000004070	Hmox2	protein_coding	heme oxygenase 2 [Source:MGI Symbol;Acc:MGI:109373]	15369	0.409897	4.88119	3.44036	0.00118939	0.0161639
16	92612814	92620105	7292	+	ENSMUSG00000097139	Gm26626	antisense	predicted gene, 26626 [Source:MGI Symbol;Acc:MGI:5477120]	NA	-1.44292	-0.925779	-3.50063	0.00120422	0.0162643
16	31948513	31961781	13269	+	ENSMUSG00000022774	Ncbp2	protein_coding	nuclear cap binding protein subunit 2 [Source:MGI Symbol;Acc:MGI:1915342]	68092	0.409327	4.70158	3.40721	0.00128683	0.0168886
16	91269772	91271933	2162	+	ENSMUSG00000046160	Olig1	protein_coding	oligodendrocyte transcription factor 1 [Source:MGI Symbol;Acc:MGI:1355334]	50914	-2.07237	-1.23568	-3.516	0.00129141	0.0169054
16	14194535	14291372	96838	-	ENSMUSG00000018830	Myh11	protein_coding	myosin, heavy polypeptide 11, smooth muscle [Source:MGI Symbol;Acc:MGI:102643]	17880	-1.11059	3.48182	-3.41217	0.00139587	0.0178457
16	35938470	35972605	34136	+	ENSMUSG00000022906	Parp9	protein_coding	poly (ADP-ribose) polymerase family, member 9 [Source:MGI Symbol;Acc:MGI:1933117]	80285	-0.490617	4.87351	-3.36912	0.00141067	0.0179749
16	38598340	38713274	114935	-	ENSMUSG00000022799	Arhgap31	protein_coding	Rho GTPase activating protein 31 [Source:MGI Symbol;Acc:MGI:1333857]	12549	0.465846	7.37708	3.33715	0.00152059	0.0190584
16	64751751	64771161	19411	-	ENSMUSG00000059920	4930453N24Rik	protein_coding	RIKEN cDNA 4930453N24 gene [Source:MGI Symbol;Acc:MGI:1914859]	67609	-0.373568	5.04784	-3.32333	0.00156925	0.0194297
16	35926511	35939151	12641	-	ENSMUSG00000049502	Dtx3l	protein_coding	deltex 3-like, E3 ubiquitin ligase [Source:MGI Symbol;Acc:MGI:2656973]	209200	-0.548918	4.39372	-3.30919	0.00163031	0.019807
16	36934983	36963212	28230	+	ENSMUSG00000022831	Hcls1	protein_coding	hematopoietic cell specific Lyn substrate 1 [Source:MGI Symbol;Acc:MGI:104568]	15163	0.954146	2.49156	3.3322	0.0016396	0.0198445
16	22381309	22439719	58411	-	ENSMUSG00000013089	Etv5	protein_coding	ets variant 5 [Source:MGI Symbol;Acc:MGI:1096867]	104156	-0.595633	3.23945	-3.29756	0.00168169	0.0200754
16	92601466	92826149	224684	-	ENSMUSG00000022952	Runx1	protein_coding	runt related transcription factor 1 [Source:MGI Symbol;Acc:MGI:99852]	12394	-1.07638	4.38857	-3.33116	0.00168767	0.0201311
16	10420557	10447362	26806	-	ENSMUSG00000050908	Tvp23a	protein_coding	trans-golgi network vesicle protein 23A [Source:MGI Symbol;Acc:MGI:3665441]	383103	1.00084	0.41298	3.2946	0.00181378	0.0211093
16	5050057	5086289	36233	+	ENSMUSG00000039473	Ubn1	protein_coding	ubinuclein 1 [Source:MGI Symbol;Acc:MGI:1891307]	170644	0.358942	6.48329	3.23812	0.00191795	0.022004
16	76287400	76373827	86428	-	ENSMUSG00000048490	Nrip1	protein_coding	nuclear receptor interacting protein 1 [Source:MGI Symbol;Acc:MGI:1315213]	268903	0.481799	6.0113	3.23427	0.0019392	0.0220988
16	50191844	50432390	240547	-	ENSMUSG00000022641	Bbx	protein_coding	bobby sox HMG box containing [Source:MGI Symbol;Acc:MGI:1917758]	70508	0.567913	6.62335	3.22997	0.00196854	0.02235
16	17144621	17160701	16081	+	ENSMUSG00000041774	Ydjc	protein_coding	YdjC homolog (bacterial) [Source:MGI Symbol;Acc:MGI:1916351]	69101	0.841872	1.01573	3.2365	0.00201736	0.0227358
16	95257558	95300260	42703	+	ENSMUSG00000062609	Kcnj15	protein_coding	potassium inwardly-rectifying channel, subfamily J, member 15 [Source:MGI Symbol;Acc:MGI:1310000]	16516	-0.944061	5.23478	-3.23642	0.0020615	0.0229899
16	20331303	20426394	95092	-	ENSMUSG00000022822	Abcc5	protein_coding	ATP-binding cassette, sub-family C (CFTR/MRP), member 5 [Source:MGI Symbol;Acc:MGI:1351644]	27416	-0.726101	4.99771	-3.21018	0.00210326	0.0232421
16	4639941	4650802	10862	+	ENSMUSG00000039646	Vasn	protein_coding	vasorin [Source:MGI Symbol;Acc:MGI:2177651]	246154	-0.72421	5.83875	-3.20342	0.00213668	0.0234432
16	31987178	31987460	283	-	ENSMUSG00000081404	Gm15694	processed_pseudogene	predicted gene 15694 [Source:MGI Symbol;Acc:MGI:3783135]	NA	1.52192	-1.59614	3.26083	0.00220471	0.0238808
16	35966752	35983230	16479	-	ENSMUSG00000086324	Gm15564	antisense	predicted gene 15564 [Source:MGI Symbol;Acc:MGI:3783013]	NA	-0.957181	1.16548	-3.17791	0.00238006	0.02514
16	91614254	91619026	4773	-	ENSMUSG00000039763	Dnajc28	protein_coding	DnaJ heat shock protein family (Hsp40) member C28 [Source:MGI Symbol;Acc:MGI:2181053]	246738	-0.637518	0.746989	-3.11823	0.00257979	0.0263942
16	22857845	22879634	21790	+	ENSMUSG00000004460	Dnajb11	protein_coding	DnaJ heat shock protein family (Hsp40) member B11 [Source:MGI Symbol;Acc:MGI:1915088]	67838	0.46919	8.11863	3.05746	0.00293017	0.0288052
16	94570010	94695517	125508	+	ENSMUSG00000022897	Dyrk1a	protein_coding	dual-specificity tyrosine-(Y)-phosphorylation regulated kinase 1a [Source:MGI Symbol;Acc:MGI:1330299]	13548	0.39312	6.27043	3.03668	0.00306883	0.0298591
16	59471775	59492461	20687	+	ENSMUSG00000022724	Riox2	protein_coding	ribosomal oxygenase 2 [Source:MGI Symbol;Acc:MGI:1914264]	67014	0.394853	3.44316	3.02386	0.00316123	0.030332
16	95359169	95586593	227425	-	ENSMUSG00000040732	Erg	protein_coding	ETS transcription factor [Source:MGI Symbol;Acc:MGI:95415]	13876	-0.971587	3.3494	-3.05005	0.0032449	0.0308689
16	23449417	23520815	71399	-	ENSMUSG00000022887	Masp1	protein_coding	mannan-binding lectin serine peptidase 1 [Source:MGI Symbol;Acc:MGI:88492]	17174	-1.21339	7.56614	-3.06604	0.00331149	0.0312641
16	11074911	11134650	59740	-	ENSMUSG00000022498	Txndc11	protein_coding	thioredoxin domain containing 11 [Source:MGI Symbol;Acc:MGI:1923620]	106200	0.32513	6.00854	3.00304	0.00331547	0.0312641
16	25959288	26105784	146497	-	ENSMUSG00000038168	P3h2	protein_coding	prolyl 3-hydroxylase 2 [Source:MGI Symbol;Acc:MGI:2146663]	210530	0.659044	4.46598	2.95043	0.00383281	0.0342114
16	37509790	37539789	30000	-	ENSMUSG00000022828	Gtf2e1	protein_coding	general transcription factor II E, polypeptide 1 (alpha subunit) [Source:MGI Symbol;Acc:MGI:1921447]	74197	0.435666	3.84396	2.93076	0.00392071	0.0347339
16	44139830	44163366	23537	+	ENSMUSG00000022698	Naa50	protein_coding	N(alpha)-acetyltransferase 50, NatE catalytic subunit [Source:MGI Symbol;Acc:MGI:1919367]	72117	0.443776	6.38595	2.87003	0.00450653	0.0382154
16	30064384	30067796	3413	+	ENSMUSG00000022528	Hes1	protein_coding	hes family bHLH transcription factor 1 [Source:MGI Symbol;Acc:MGI:104853]	15205	-0.521746	2.7168	-2.81766	0.00510604	0.0413003
16	32016290	32079342	63053	-	ENSMUSG00000022781	Pak2	protein_coding	p21 (RAC1) activated kinase 2 [Source:MGI Symbol;Acc:MGI:1339984]	224105	0.314295	7.49013	2.81148	0.00513649	0.0414273
16	18620502	18629954	9453	-	ENSMUSG00000072214	Septin5	protein_coding	septin 5 [Source:MGI Symbol;Acc:MGI:1195461]	18951	0.63003	5.47861	2.79891	0.0054134	0.0430486
16	17069696	17087045	17350	+	ENSMUSG00000022773	Ypel1	protein_coding	yippee like 1 [Source:MGI Symbol;Acc:MGI:1913303]	106369	-0.596718	2.68941	-2.7639	0.00583082	0.0452635
16	5244152	5255983	11832	-	ENSMUSG00000022544	Eef2kmt	protein_coding	eukaryotic elongation factor 2 lysine methyltransferase [Source:MGI Symbol;Acc:MGI:1917761]	70511	0.425629	3.72626	2.72261	0.00628703	0.0474367
16	20724454	20734511	10058	-	ENSMUSG00000022847	Thpo	protein_coding	thrombopoietin [Source:MGI Symbol;Acc:MGI:101875]	21832	-1.17182	-0.326907	-2.77521	0.00657465	0.0488585
15	25285802	25332659	46858	-	ENSMUSG00000115355	4930445E18Rik	lincRNA	RIKEN cDNA 4930445E18 gene [Source:MGI Symbol;Acc:MGI:1925365]	NA	1.42208	1.66667	7.21849	1.79791e-07	0.000282757
15	76723985	76818170	94186	-	ENSMUSG00000033697	Arhgap39	protein_coding	Rho GTPase activating protein 39 [Source:MGI Symbol;Acc:MGI:107858]	223666	0.913433	5.47706	6.71492	5.22642e-07	0.000400239
15	100641077	100669553	28477	-	ENSMUSG00000098112	Bin2	protein_coding	bridging integrator 2 [Source:MGI Symbol;Acc:MGI:3611448]	668218	0.925077	4.86971	6.49075	8.63295e-07	0.000500826
15	102144362	102149511	5150	+	ENSMUSG00000023046	Igfbp6	protein_coding	insulin-like growth factor binding protein 6 [Source:MGI Symbol;Acc:MGI:96441]	16012	-2.09768	4.56368	-6.35876	1.31373e-06	0.00051537
15	25843180	25973687	130508	+	ENSMUSG00000022270	Retreg1	protein_coding	reticulophagy regulator 1 [Source:MGI Symbol;Acc:MGI:1913520]	66270	-0.990574	6.03163	-5.87901	3.51585e-06	0.000747899
15	57694665	57839832	145168	+	ENSMUSG00000071757	Zhx2	protein_coding	zinc fingers and homeoboxes 2 [Source:MGI Symbol;Acc:MGI:2683087]	387609	-1.02348	2.42814	-5.50672	8.44639e-06	0.00104327
15	101347444	101370162	22719	-	ENSMUSG00000037185	Krt80	protein_coding	keratin 80 [Source:MGI Symbol;Acc:MGI:1921377]	74127	-1.27048	5.7734	-5.34986	1.25906e-05	0.00135801
15	25363277	25413764	50488	-	ENSMUSG00000045763	Basp1	protein_coding	brain abundant, membrane attached signal protein 1 [Source:MGI Symbol;Acc:MGI:1917600]	70350	0.809482	7.71731	5.19583	1.7433e-05	0.00157061
15	78244801	78262580	17780	+	ENSMUSG00000071715	Ncf4	protein_coding	neutrophil cytosolic factor 4 [Source:MGI Symbol;Acc:MGI:109186]	17972	-1.45345	-0.225803	-4.94815	3.40187e-05	0.00215377
15	78842624	78850897	8274	+	ENSMUSG00000049521	Cdc42ep1	protein_coding	CDC42 effector protein (Rho GTPase binding) 1 [Source:MGI Symbol;Acc:MGI:1929763]	104445	-1.0142	4.44452	-4.89158	3.68407e-05	0.00222147
15	100575318	100599984	24667	-	ENSMUSG00000009739	Pou6f1	protein_coding	POU domain, class 6, transcription factor 1 [Source:MGI Symbol;Acc:MGI:102935]	19009	-1.06987	2.28336	-4.84766	4.12335e-05	0.00239217
15	34238028	34284302	46275	+	ENSMUSG00000022257	Laptm4b	protein_coding	lysosomal-associated protein transmembrane 4B [Source:MGI Symbol;Acc:MGI:1890494]	114128	-0.733027	6.33863	-4.70697	5.63035e-05	0.00283666
15	89142486	89149628	7143	-	ENSMUSG00000053137	Mapk11	protein_coding	mitogen-activated protein kinase 11 [Source:MGI Symbol;Acc:MGI:1338024]	19094	1.42467	0.302658	4.66946	6.69249e-05	0.00310447
15	88955884	88979007	23124	-	ENSMUSG00000035805	Mlc1	protein_coding	megalencephalic leukoencephalopathy with subcortical cysts 1 homolog (human) [Source:MGI Symbol;Acc:MGI:2157910]	170790	1.76151	0.0422845	4.62883	7.7902e-05	0.00342858
15	79724070	79742536	18467	-	ENSMUSG00000042524	Sun2	protein_coding	Sad1 and UNC84 domain containing 2 [Source:MGI Symbol;Acc:MGI:2443011]	223697	-0.710236	5.98391	-4.56683	7.89748e-05	0.00345939
15	11839896	11907287	67392	-	ENSMUSG00000022206	Npr3	protein_coding	natriuretic peptide receptor 3 [Source:MGI Symbol;Acc:MGI:97373]	18162	-1.34612	3.50352	-4.51167	9.73998e-05	0.00395697
15	75596628	75599481	2854	+	ENSMUSG00000022579	Gpihbp1	protein_coding	GPI-anchored HDL-binding protein 1 [Source:MGI Symbol;Acc:MGI:1915703]	68453	-1.44162	2.09605	-4.4577	0.00011295	0.00419889
15	63929097	64060478	131382	-	ENSMUSG00000022378	Fam49b	protein_coding	family with sequence similarity 49, member B [Source:MGI Symbol;Acc:MGI:1923520]	223601	0.598061	5.38809	4.39811	0.000118394	0.00431743
15	79108898	79136900	28003	+	ENSMUSG00000033039	Micall1	protein_coding	microtubule associated monooxygenase, calponin and LIM domain containing -like 1 [Source:MGI Symbol;Acc:MGI:105870]	27008	0.550887	5.59079	4.39392	0.000119475	0.00431928
15	74669083	74672570	3488	-	ENSMUSG00000022602	Arc	protein_coding	activity regulated cytoskeletal-associated protein [Source:MGI Symbol;Acc:MGI:88067]	11838	-2.69742	-0.998263	-4.46476	0.000132088	0.00460832
15	80173721	80215519	41799	+	ENSMUSG00000042428	Mgat3	protein_coding	mannoside acetylglucosaminyltransferase 3 [Source:MGI Symbol;Acc:MGI:104532]	17309	-1.13053	3.94995	-4.36258	0.000135868	0.00468682
15	32920723	33034935	114213	+	ENSMUSG00000022261	Sdc2	protein_coding	syndecan 2 [Source:MGI Symbol;Acc:MGI:1349165]	15529	-0.996516	4.18065	-4.29399	0.000157698	0.00512805
15	101322888	101405834	82947	+	ENSMUSG00000116114	Gm35853	antisense	predicted gene, 35853 [Source:MGI Symbol;Acc:MGI:5595012]	NA	-1.02821	0.522345	-4.2842	0.000162233	0.00516732
15	81235499	81238964	3466	+	ENSMUSG00000050164	Mchr1	protein_coding	melanin-concentrating hormone receptor 1 [Source:MGI Symbol;Acc:MGI:2180756]	207911	-2.93799	-0.547551	-4.36022	0.000175455	0.00543983
15	102326116	102331873	5758	+	ENSMUSG00000001289	Pfdn5	protein_coding	prefoldin 5 [Source:MGI Symbol;Acc:MGI:1928753]	56612	-0.463355	5.43099	-4.20225	0.000189968	0.00568695
15	78523346	78531416	8071	-	ENSMUSG00000022440	C1qtnf6	protein_coding	C1q and tumor necrosis factor related protein 6 [Source:MGI Symbol;Acc:MGI:1919959]	72709	0.666452	7.20616	4.19631	0.000193771	0.00575155
15	83563592	83574203	10612	+	ENSMUSG00000041736	Tspo	protein_coding	translocator protein [Source:MGI Symbol;Acc:MGI:88222]	12257	-0.899346	3.57715	-4.20164	0.000195227	0.0057724
15	82370527	82380260	9734	-	ENSMUSG00000061740	Cyp2d22	protein_coding	cytochrome P450, family 2, subfamily d, polypeptide 22 [Source:MGI Symbol;Acc:MGI:1929474]	56448	-0.980053	2.39941	-4.19426	0.000200868	0.00584884
15	39076932	39087121	10190	+	ENSMUSG00000054196	Cthrc1	protein_coding	collagen triple helix repeat containing 1 [Source:MGI Symbol;Acc:MGI:1915838]	68588	1.29291	1.86669	4.16733	0.000225561	0.00628194
15	88819646	88826683	7038	+	ENSMUSG00000023272	Creld2	protein_coding	cysteine-rich with EGF-like domains 2 [Source:MGI Symbol;Acc:MGI:1923987]	76737	0.757991	7.52083	4.11162	0.000239605	0.00646089
15	79823896	79834688	10793	-	ENSMUSG00000089715	Cbx6	protein_coding	chromobox 6 [Source:MGI Symbol;Acc:MGI:3512628]	494448	-0.75368	3.33368	-4.10151	0.000245487	0.00651626
15	78479256	78495271	16016	-	ENSMUSG00000068227	Il2rb	protein_coding	interleukin 2 receptor, beta chain [Source:MGI Symbol;Acc:MGI:96550]	16185	0.59736	6.76915	4.08976	0.000250199	0.00655175
15	32244810	32696341	451532	+	ENSMUSG00000022231	Sema5a	protein_coding	sema domain, seven thrombospondin repeats (type 1 and type 1-like), transmembrane domain (TM) and short cytoplasmic domain, (semaphorin) 5A [Source:MGI Symbol;Acc:MGI:107556]	20356	-0.808427	3.16857	-4.09575	0.000250246	0.00655175
15	39091231	39112716	21486	-	ENSMUSG00000022299	Slc25a32	protein_coding	solute carrier family 25, member 32 [Source:MGI Symbol;Acc:MGI:1917156]	69906	0.589041	2.17882	4.02124	0.000295333	0.00716849
15	73095844	73184935	89092	-	ENSMUSG00000036698	Ago2	protein_coding	argonaute RISC catalytic subunit 2 [Source:MGI Symbol;Acc:MGI:2446632]	239528	0.514479	7.50615	3.99305	0.000315559	0.00750408
15	68928420	69101211	172792	+	ENSMUSG00000022332	Khdrbs3	protein_coding	KH domain containing, RNA binding, signal transduction associated 3 [Source:MGI Symbol;Acc:MGI:1313312]	13992	-1.11801	2.2893	-4.00595	0.00032579	0.00766482
15	75862327	75867408	5082	+	ENSMUSG00000022575	Gsdmd	protein_coding	gasdermin D [Source:MGI Symbol;Acc:MGI:1916396]	69146	-0.878137	3.27639	-3.97117	0.000341909	0.0079104
15	3280070	3303526	23457	-	ENSMUSG00000091119	Ccdc152	protein_coding	coiled-coil domain containing 152 [Source:MGI Symbol;Acc:MGI:3641617]	100039139	-1.41723	-1.20493	-3.98642	0.000360601	0.00811673
15	99029891	99038110	8220	+	ENSMUSG00000043091	Tuba1c	protein_coding	tubulin, alpha 1C [Source:MGI Symbol;Acc:MGI:1095409]	22146	0.46835	6.56774	3.93354	0.000364182	0.00815469
15	97157029	97167244	10216	-	ENSMUSG00000116295	Gm32885	lincRNA	predicted gene, 32885 [Source:MGI Symbol;Acc:MGI:5592044]	NA	1.1937	2.26877	3.9497	0.000379178	0.00837768
15	96994820	97055956	61137	-	ENSMUSG00000022464	Slc38a4	protein_coding	solute carrier family 38, member 4 [Source:MGI Symbol;Acc:MGI:1916604]	69354	0.536036	10.4419	3.89676	0.000398522	0.00861934
15	10952332	10980150	27819	+	ENSMUSG00000058914	C1qtnf3	protein_coding	C1q and tumor necrosis factor related protein 3 [Source:MGI Symbol;Acc:MGI:1932136]	81799	-2.43409	1.21834	-4.00515	0.000401886	0.00865154
15	66891320	66923201	31882	+	ENSMUSG00000005124	Ccn4	protein_coding	cellular communication network factor 4 [Source:MGI Symbol;Acc:MGI:1197008]	22402	-1.34088	2.12819	-3.93528	0.0004036	0.00865761
15	97778520	97792692	14173	+	ENSMUSG00000081534	Slc48a1	protein_coding	solute carrier family 48 (heme transporter), member 1 [Source:MGI Symbol;Acc:MGI:1914989]	67739	-0.858306	5.16985	-3.84098	0.000468461	0.00943312
15	99422035	99457748	35714	-	ENSMUSG00000023009	Nckap5l	protein_coding	NCK-associated protein 5-like [Source:MGI Symbol;Acc:MGI:3609653]	380969	1.1891	5.11774	3.82065	0.000520659	0.0101065
15	58415468	58457740	42273	+	ENSMUSG00000037119	Fam91a1	protein_coding	family with sequence similarity 91, member A1 [Source:MGI Symbol;Acc:MGI:1277178]	210998	0.421032	5.7127	3.76845	0.000542235	0.0103166
15	78428564	78439303	10740	+	ENSMUSG00000033287	Kctd17	protein_coding	potassium channel tetramerisation domain containing 17 [Source:MGI Symbol;Acc:MGI:1920094]	72844	0.6407	6.33495	3.75921	0.000558341	0.0105056
15	101946001	101954287	8287	-	ENSMUSG00000050463	Krt78	protein_coding	keratin 78 [Source:MGI Symbol;Acc:MGI:1917529]	332131	-2.39761	-0.722696	-3.86194	0.000571434	0.0106215
15	102234938	102257517	22580	-	ENSMUSG00000001288	Rarg	protein_coding	retinoic acid receptor, gamma [Source:MGI Symbol;Acc:MGI:97858]	19411	-0.820146	4.57048	-3.74017	0.000595621	0.0108687
15	78325752	78353847	28096	+	ENSMUSG00000071713	Csf2rb	protein_coding	colony stimulating factor 2 receptor, beta, low-affinity (granulocyte-macrophage) [Source:MGI Symbol;Acc:MGI:1339759]	12983	-1.0455	4.40826	-3.7349	0.000625831	0.0111586
15	102215995	102231944	15950	-	ENSMUSG00000001281	Itgb7	protein_coding	integrin beta 7 [Source:MGI Symbol;Acc:MGI:96616]	16421	-1.16239	2.69646	-3.67333	0.000744242	0.0123191
15	58941234	59082005	140772	-	ENSMUSG00000022353	Mtss1	protein_coding	MTSS I-BAR domain containing 1 [Source:MGI Symbol;Acc:MGI:2384818]	211401	0.474423	6.72706	3.61767	0.000779463	0.0125534
15	76296601	76328015	31415	-	ENSMUSG00000022562	Oplah	protein_coding	5-oxoprolinase (ATP-hydrolysing) [Source:MGI Symbol;Acc:MGI:1922725]	75475	-0.615946	3.12559	-3.5816	0.000855027	0.0131798
15	78913919	78919517	5599	+	ENSMUSG00000116165	Pdxp	protein_coding	pyridoxal (pyridoxine, vitamin B6) phosphatase [Source:MGI Symbol;Acc:MGI:1919282]	57028	0.931116	0.783844	3.59821	0.000855992	0.0131798
15	74813452	74818815	5364	-	ENSMUSG00000068349	Gml	protein_coding	glycosylphosphatidylinositol anchored molecule like [Source:MGI Symbol;Acc:MGI:3644767]	625599	-1.52979	0.164857	-3.6456	0.000856093	0.0131798
15	74762056	74763620	1565	-	ENSMUSG00000034634	Ly6d	protein_coding	lymphocyte antigen 6 complex, locus D [Source:MGI Symbol;Acc:MGI:96881]	17068	-1.91902	-1.53716	-3.63923	0.000930002	0.013829
15	100869858	101045938	176081	+	ENSMUSG00000023033	Scn8a	protein_coding	sodium channel, voltage-gated, type VIII, alpha [Source:MGI Symbol;Acc:MGI:103169]	20273	-1.10613	0.548479	-3.54329	0.00101231	0.0146546
15	99317225	99370482	53258	-	ENSMUSG00000023008	Fmnl3	protein_coding	formin-like 3 [Source:MGI Symbol;Acc:MGI:109569]	22379	-0.459366	6.11677	-3.49934	0.00103414	0.0148208
15	42424723	42676977	252255	-	ENSMUSG00000022309	Angpt1	protein_coding	angiopoietin 1 [Source:MGI Symbol;Acc:MGI:108448]	11600	-1.15333	0.287952	-3.45887	0.00125678	0.0166946
15	98663421	98677461	14041	-	ENSMUSG00000054855	Rnd1	protein_coding	Rho family GTPase 1 [Source:MGI Symbol;Acc:MGI:2444878]	223881	-0.7827	0.893073	-3.42373	0.00127355	0.0168271
15	77403789	77411135	7347	-	ENSMUSG00000057346	Apol9a	protein_coding	apolipoprotein L 9a [Source:MGI Symbol;Acc:MGI:3606001]	223672	-1.34774	1.20515	-3.46959	0.00127507	0.0168271
15	72805600	72810324	4725	-	ENSMUSG00000106847	Peg13	sense_intronic	paternally expressed 13 [Source:MGI Symbol;Acc:MGI:2663476]	NA	-0.757296	4.82619	-3.41999	0.0012801	0.0168436
15	10177238	10349180	171943	+	ENSMUSG00000005268	Prlr	protein_coding	prolactin receptor [Source:MGI Symbol;Acc:MGI:97763]	19116	-0.714751	2.7156	-3.39972	0.00133589	0.0173101
15	73723145	73758766	35622	+	ENSMUSG00000059895	Ptp4a3	protein_coding	protein tyrosine phosphatase 4a3 [Source:MGI Symbol;Acc:MGI:1277098]	19245	0.639215	6.41573	3.39301	0.00134563	0.017417
15	75890956	75894481	3526	-	ENSMUSG00000022574	Naprt	protein_coding	nicotinate phosphoribosyltransferase [Source:MGI Symbol;Acc:MGI:2442664]	223646	-1.00445	-0.513152	-3.41281	0.00136279	0.0175843
15	71431609	71727838	296230	-	ENSMUSG00000036800	Fam135b	protein_coding	family with sequence similarity 135, member B [Source:MGI Symbol;Acc:MGI:1917613]	70363	-1.17707	3.16699	-3.41258	0.00141453	0.0179991
15	68083764	68258856	175093	-	ENSMUSG00000022335	Zfat	protein_coding	zinc finger and AT hook domain containing [Source:MGI Symbol;Acc:MGI:2681865]	380993	0.418887	4.12073	3.33028	0.00154419	0.0192283
15	95790843	95974751	183909	+	ENSMUSG00000064210	Ano6	protein_coding	anoctamin 6 [Source:MGI Symbol;Acc:MGI:2145890]	105722	0.422523	6.92655	3.30623	0.00163454	0.0198372
15	74747852	74753046	5195	-	ENSMUSG00000022594	Lynx1	protein_coding	Ly6/neurotoxin 1 [Source:MGI Symbol;Acc:MGI:1345180]	23936	-1.15589	2.8775	-3.27046	0.00199102	0.0225051
15	90487482	90679432	191951	-	ENSMUSG00000052560	Cpne8	protein_coding	copine VIII [Source:MGI Symbol;Acc:MGI:1914121]	66871	-0.674689	2.46105	-3.22294	0.00202488	0.0228038
15	54250619	54278484	27866	-	ENSMUSG00000063727	Tnfrsf11b	protein_coding	tumor necrosis factor receptor superfamily, member 11b (osteoprotegerin) [Source:MGI Symbol;Acc:MGI:109587]	18383	-1.58787	7.76087	-3.28749	0.002092	0.0231683
15	34306677	34436273	129597	+	ENSMUSG00000022324	Matn2	protein_coding	matrilin 2 [Source:MGI Symbol;Acc:MGI:109613]	17181	-1.34834	4.62608	-3.25015	0.00218318	0.0237652
15	93499114	93595891	96778	-	ENSMUSG00000036158	Prickle1	protein_coding	prickle planar cell polarity protein 1 [Source:MGI Symbol;Acc:MGI:1916034]	106042	-0.47465	4.14257	-3.16541	0.0022787	0.0244059
15	32240565	32244662	4098	-	ENSMUSG00000096956	Snhg18	lincRNA	small nucleolar RNA host gene 18 [Source:MGI Symbol;Acc:MGI:1914085]	NA	-0.656433	3.14641	-3.16622	0.00230989	0.0246366
15	75704280	75715485	11206	+	ENSMUSG00000022580	Rhpn1	protein_coding	rhophilin, Rho GTPase binding protein 1 [Source:MGI Symbol;Acc:MGI:1098783]	14787	-0.769511	0.659884	-3.14129	0.00249618	0.0258915
15	25101020	25128404	27385	-	ENSMUSG00000115174	Gm35996	lincRNA	predicted gene, 35996 [Source:MGI Symbol;Acc:MGI:5595155]	NA	1.44084	-0.711495	3.18356	0.0026192	0.0266554
15	102296266	102324357	28092	+	ENSMUSG00000058290	Espl1	protein_coding	extra spindle pole bodies 1, separase [Source:MGI Symbol;Acc:MGI:2146156]	105988	0.779559	0.611366	3.11665	0.00265165	0.0268885
15	74819071	74834871	15801	+	ENSMUSG00000068600	Gml2	protein_coding	glycosylphosphatidylinositol anchored molecule like 2 [Source:MGI Symbol;Acc:MGI:1341831]	15202	-1.72682	-0.761599	-3.1793	0.00279679	0.0277613
15	27730651	28025848	295198	-	ENSMUSG00000022263	Trio	protein_coding	triple functional domain (PTPRF interacting) [Source:MGI Symbol;Acc:MGI:1927230]	223435	0.544366	5.17623	3.07178	0.00284732	0.0281736
15	96571418	96642913	71496	-	ENSMUSG00000023169	Slc38a1	protein_coding	solute carrier family 38, member 1 [Source:MGI Symbol;Acc:MGI:2145895]	105727	0.457903	9.02018	3.03309	0.00309917	0.0299902
15	81663889	81688315	24427	+	ENSMUSG00000022394	L3mbtl2	protein_coding	L3MBTL2 polycomb repressive complex 1 subunit [Source:MGI Symbol;Acc:MGI:2443584]	214669	0.449713	3.78633	3.01775	0.00321025	0.0306535
15	76001093	76014336	13244	-	ENSMUSG00000046761	Fam83h	protein_coding	family with sequence similarity 83, member H [Source:MGI Symbol;Acc:MGI:2145900]	105732	0.476484	5.56243	3.00164	0.00333583	0.0313253
15	76851609	76871435	19827	-	ENSMUSG00000022526	Zfp251	protein_coding	zinc finger protein 251 [Source:MGI Symbol;Acc:MGI:1918841]	71591	0.427548	3.31619	2.99091	0.00341322	0.0318956
15	76721465	76723845	2381	-	ENSMUSG00000116138	C030006K11Rik	protein_coding	RIKEN cDNA C030006K11 gene [Source:MGI Symbol;Acc:MGI:1925941]	223665	-0.695693	1.64561	-2.97378	0.00365352	0.0333219
15	76101481	76120195	18715	-	ENSMUSG00000115388	Eppk1	protein_coding	epiplakin 1 [Source:MGI Symbol;Acc:MGI:2386306]	223650	1.02784	1.98387	3.00018	0.00370717	0.033542
15	74994877	74998031	3155	-	ENSMUSG00000075602	Ly6a	protein_coding	lymphocyte antigen 6 complex, locus A [Source:MGI Symbol;Acc:MGI:107527]	110454	-0.980281	7.73818	-2.99068	0.0037472	0.0338198
15	97244125	97247287	3163	-	ENSMUSG00000048218	Amigo2	protein_coding	adhesion molecule with Ig like domain 2 [Source:MGI Symbol;Acc:MGI:2145995]	105827	-0.851137	2.76288	-2.96771	0.00383303	0.0342114
15	75044018	75048830	4813	-	ENSMUSG00000079018	Ly6c1	protein_coding	lymphocyte antigen 6 complex, locus C1 [Source:MGI Symbol;Acc:MGI:96882]	17067	-1.1474	7.84492	-2.97431	0.00406399	0.0355555
15	76703553	76710548	6996	-	ENSMUSG00000033762	Recql4	protein_coding	RecQ protein-like 4 [Source:MGI Symbol;Acc:MGI:1931028]	79456	2.05701	-2.10763	3.03191	0.00421944	0.0364907
15	101050194	101078567	28374	-	ENSMUSG00000095440	Fignl2	protein_coding	fidgetin-like 2 [Source:MGI Symbol;Acc:MGI:3646919]	668225	0.334139	5.32103	2.86499	0.00454932	0.0384746
15	74770908	74778859	7952	-	ENSMUSG00000101026	Ly6g6g	protein_coding	lymphocyte antigen 6 complex, locus G6G [Source:MGI Symbol;Acc:MGI:1925975]	NA	-1.47618	-1.27937	-2.94922	0.00465687	0.0390179
15	77633946	77643286	9341	-	ENSMUSG00000091694	Apol11b	protein_coding	apolipoprotein L 11b [Source:MGI Symbol;Acc:MGI:3036248]	328563	-1.8785	-2.06262	-2.95172	0.00498484	0.0406972
15	101128522	101145336	16815	+	ENSMUSG00000000530	Acvrl1	protein_coding	activin A receptor, type II-like 1 [Source:MGI Symbol;Acc:MGI:1338946]	11482	-0.456553	7.64992	-2.79718	0.00532185	0.0425193
15	13028701	13173675	144975	-	ENSMUSG00000039385	Cdh6	protein_coding	cadherin 6 [Source:MGI Symbol;Acc:MGI:107435]	12563	-0.932947	1.14711	-2.80242	0.005781	0.0450737
15	79360684	79403569	42886	-	ENSMUSG00000009035	Tmem184b	protein_coding	transmembrane protein 184b [Source:MGI Symbol;Acc:MGI:2445179]	223693	-0.404802	6.72283	-2.74619	0.00595803	0.0458559
15	99125916	99213215	87300	+	ENSMUSG00000051934	Spats2	protein_coding	spermatogenesis associated, serine-rich 2 [Source:MGI Symbol;Acc:MGI:1919822]	72572	0.437288	6.63533	2.72284	0.00628731	0.0474367
15	73512560	73572242	59683	+	ENSMUSG00000036661	Dennd3	protein_coding	DENN/MADD domain containing 3 [Source:MGI Symbol;Acc:MGI:2146009]	105841	-0.590952	2.32725	-2.72517	0.00636241	0.0477938
14	30009023	30040527	31505	+	ENSMUSG00000015970	Chdh	protein_coding	choline dehydrogenase [Source:MGI Symbol;Acc:MGI:1860776]	218865	0.893581	6.12726	6.47999	8.83216e-07	0.000500826
14	51984719	52006251	21533	+	ENSMUSG00000004562	Arhgef40	protein_coding	Rho guanine nucleotide exchange factor (GEF) 40 [Source:MGI Symbol;Acc:MGI:2685515]	268739	-1.12627	2.95871	-6.45145	9.55365e-07	0.000500826
14	32028989	32062197	33209	+	ENSMUSG00000021903	Galnt15	protein_coding	polypeptide N-acetylgalactosaminyltransferase 15 [Source:MGI Symbol;Acc:MGI:1926004]	78754	-1.98659	3.00721	-5.70801	5.89456e-06	0.000885109
14	66135039	66152948	17910	+	ENSMUSG00000022041	Chrna2	protein_coding	cholinergic receptor, nicotinic, alpha polypeptide 2 (neuronal) [Source:MGI Symbol;Acc:MGI:87886]	110902	3.002	1.14347	5.33271	1.6237e-05	0.00149811
14	29996135	30008896	12762	-	ENSMUSG00000015966	Il17rb	protein_coding	interleukin 17 receptor B [Source:MGI Symbol;Acc:MGI:1355292]	50905	0.779571	4.22987	4.95137	3.12874e-05	0.00206881
14	8165996	8173025	7030	-	ENSMUSG00000021748	Pdhb	protein_coding	pyruvate dehydrogenase (lipoamide) beta [Source:MGI Symbol;Acc:MGI:1915513]	68263	0.456524	5.7231	4.85686	3.89791e-05	0.00229617
14	7964533	7994573	30041	-	ENSMUSG00000025279	Dnase1l3	protein_coding	deoxyribonuclease 1-like 3 [Source:MGI Symbol;Acc:MGI:1314633]	13421	0.779005	7.07788	4.79822	4.52693e-05	0.0025346
14	51091077	51106151	15075	+	ENSMUSG00000021876	Rnase4	protein_coding	ribonuclease, RNase A family 4 [Source:MGI Symbol;Acc:MGI:1926217]	58809	-1.06294	5.1198	-4.7416	5.33088e-05	0.00270357
14	27038941	27107286	68346	+	ENSMUSG00000040717	Il17rd	protein_coding	interleukin 17 receptor D [Source:MGI Symbol;Acc:MGI:2159727]	171463	-0.925486	3.02203	-4.69797	5.83825e-05	0.00287841
14	32856756	32939491	82736	+	ENSMUSG00000050666	Vstm4	protein_coding	V-set and transmembrane domain containing 4 [Source:MGI Symbol;Acc:MGI:2444633]	320736	0.636234	6.14637	4.52834	8.64321e-05	0.00367721
14	79288756	79301645	12890	-	ENSMUSG00000022018	Rgcc	protein_coding	regulator of cell cycle [Source:MGI Symbol;Acc:MGI:1913464]	66214	-0.562619	5.25802	-4.35002	0.000132928	0.00461827
14	28504750	28527448	22699	+	ENSMUSG00000021994	Wnt5a	protein_coding	wingless-type MMTV integration site family, member 5A [Source:MGI Symbol;Acc:MGI:98958]	22418	-1.28291	1.86154	-4.32634	0.000152139	0.00501109
14	118787908	118875489	87582	+	ENSMUSG00000022132	Cldn10	protein_coding	claudin 10 [Source:MGI Symbol;Acc:MGI:1913101]	58187	-1.96619	-0.813091	-4.3439	0.000162537	0.00516732
14	30879200	30881610	2411	+	ENSMUSG00000042485	Mustn1	protein_coding	musculoskeletal, embryonic nuclear protein 1 [Source:MGI Symbol;Acc:MGI:1913425]	66175	-1.42782	5.81566	-4.22939	0.000198018	0.0058324
14	55769057	55784095	15039	-	ENSMUSG00000022220	Adcy4	protein_coding	adenylate cyclase 4 [Source:MGI Symbol;Acc:MGI:99674]	104110	-1.15661	3.23691	-4.1759	0.000215844	0.00614511
14	56402581	56525032	122452	+	ENSMUSG00000000365	Rnf17	protein_coding	ring finger protein 17 [Source:MGI Symbol;Acc:MGI:1353419]	30054	0.903693	2.27943	4.12913	0.000233201	0.00639879
14	34085981	34100571	14591	+	ENSMUSG00000021950	Anxa8	protein_coding	annexin A8 [Source:MGI Symbol;Acc:MGI:1201374]	11752	-1.25717	4.9139	-4.12499	0.000248869	0.00654984
14	43818765	43875517	56753	-	ENSMUSG00000072601	Ear1	protein_coding	eosinophil-associated, ribonuclease A family, member 1 [Source:MGI Symbol;Acc:MGI:108021]	13586	-1.97977	3.03111	-4.0789	0.000314665	0.00750408
14	31217860	31230352	12493	+	ENSMUSG00000021904	Sema3g	protein_coding	sema domain, immunoglobulin domain (Ig), short basic domain, secreted, (semaphorin) 3G [Source:MGI Symbol;Acc:MGI:3041242]	218877	-1.28649	5.13436	-4.02166	0.000322831	0.0076072
14	3884172	3921640	37469	+	ENSMUSG00000096218	Gm2916	protein_coding	predicted gene 2916 [Source:MGI Symbol;Acc:MGI:3781094]	NA	1.38714	-0.967895	4.00247	0.00034469	0.00795072
14	51091150	51102009	10860	+	ENSMUSG00000072115	Ang	protein_coding	angiogenin, ribonuclease, RNase A family, 5 [Source:MGI Symbol;Acc:MGI:88022]	11727	-1.015	1.61337	-3.94064	0.00037596	0.0083211
14	118137158	118163261	26104	+	ENSMUSG00000022131	Gpr180	protein_coding	G protein-coupled receptor 180 [Source:MGI Symbol;Acc:MGI:1930949]	58245	0.476412	4.96744	3.84533	0.00045072	0.00927852
14	20836660	20843385	6726	+	ENSMUSG00000021822	Plau	protein_coding	plasminogen activator, urokinase [Source:MGI Symbol;Acc:MGI:97611]	18792	0.786051	5.99598	3.84234	0.000462667	0.00942316
14	32159865	32179855	19991	+	ENSMUSG00000056234	Ncoa4	protein_coding	nuclear receptor coactivator 4 [Source:MGI Symbol;Acc:MGI:1350932]	27057	-0.484052	5.83288	-3.76047	0.00055312	0.0104459
14	25711642	25769039	57398	-	ENSMUSG00000055538	Zcchc24	protein_coding	zinc finger, CCHC domain containing 24 [Source:MGI Symbol;Acc:MGI:1919168]	71918	-0.971434	4.68991	-3.68709	0.000694152	0.0118789
14	54631231	54641364	10134	-	ENSMUSG00000059674	Cdh24	protein_coding	cadherin-like 24 [Source:MGI Symbol;Acc:MGI:1928330]	239096	0.608108	3.7987	3.6665	0.000696757	0.0118838
14	54431612	54445364	13753	+	ENSMUSG00000000957	Mmp14	protein_coding	matrix metallopeptidase 14 (membrane-inserted) [Source:MGI Symbol;Acc:MGI:101900]	17387	-0.812166	7.34431	-3.63283	0.000771999	0.0125144
14	63436394	63465498	29105	+	ENSMUSG00000035095	Fam167a	protein_coding	family with sequence similarity 167, member A [Source:MGI Symbol;Acc:MGI:3606565]	219148	-0.434489	4.63875	-3.62106	0.000772737	0.0125144
14	59625308	59631660	6353	+	ENSMUSG00000044461	Shisa2	protein_coding	shisa family member 2 [Source:MGI Symbol;Acc:MGI:2444716]	219134	0.582996	2.17148	3.60688	0.000802978	0.012776
14	50931082	50965237	34156	+	ENSMUSG00000115338	Pnp	protein_coding	purine-nucleoside phosphorylase [Source:MGI Symbol;Acc:MGI:97365]	18950	-0.441095	4.21689	-3.59866	0.0008154	0.0128856
14	44102654	44103534	881	+	ENSMUSG00000072596	Ear2	protein_coding	eosinophil-associated, ribonuclease A family, member 2 [Source:MGI Symbol;Acc:MGI:108020]	13587	-1.88885	3.28472	-3.66217	0.000874401	0.0132992
14	122456795	122465677	8883	-	ENSMUSG00000041703	Zic5	protein_coding	zinc finger protein of the cerebellum 5 [Source:MGI Symbol;Acc:MGI:1929518]	65100	1.66914	-0.356938	3.62123	0.000932711	0.0138559
14	33923587	33937983	14397	+	ENSMUSG00000021943	Gdf10	protein_coding	growth differentiation factor 10 [Source:MGI Symbol;Acc:MGI:95684]	14560	-1.86646	0.461647	-3.5927	0.00103502	0.0148208
14	74640840	74709494	68655	+	ENSMUSG00000034997	Htr2a	protein_coding	5-hydroxytryptamine (serotonin) receptor 2A [Source:MGI Symbol;Acc:MGI:109521]	15558	-1.75845	-0.358943	-3.56964	0.00107636	0.0151938
14	54142851	54148868	6018	+	ENSMUSG00000104876	Trdc	TR_C_gene	T cell receptor delta, constant region [Source:MGI Symbol;Acc:MGI:98612]	NA	2.33449	-0.926365	3.60037	0.00108564	0.0152828
14	73237895	73243294	5400	+	ENSMUSG00000033446	Lpar6	protein_coding	lysophosphatidic acid receptor 6 [Source:MGI Symbol;Acc:MGI:1914418]	67168	-0.743876	1.77708	-3.44319	0.00120839	0.0162733
14	50955992	50964749	8758	+	ENSMUSG00000068417	Pnp2	protein_coding	purine-nucleoside phosphorylase 2 [Source:MGI Symbol;Acc:MGI:3712328]	667034	-0.808621	0.921478	-3.43515	0.00124419	0.0165704
14	60963875	61046490	82616	-	ENSMUSG00000060548	Tnfrsf19	protein_coding	tumor necrosis factor receptor superfamily, member 19 [Source:MGI Symbol;Acc:MGI:1352474]	29820	-1.14487	0.333244	-3.4094	0.00141574	0.0179991
14	66802864	66868688	65825	-	ENSMUSG00000022048	Dpysl2	protein_coding	dihydropyrimidinase-like 2 [Source:MGI Symbol;Acc:MGI:1349763]	12934	-0.918216	3.69241	-3.35867	0.0015267	0.0190888
14	57689662	57758388	68727	-	ENSMUSG00000021959	Lats2	protein_coding	large tumor suppressor 2 [Source:MGI Symbol;Acc:MGI:1354386]	50523	-0.359887	4.69762	-3.26427	0.00180357	0.0210385
14	31359880	31436078	76199	-	ENSMUSG00000021892	Sh3bp5	protein_coding	SH3-domain binding protein 5 (BTK-associated) [Source:MGI Symbol;Acc:MGI:1344391]	24056	-0.882143	3.58838	-3.23746	0.00202928	0.0228197
14	21983959	21989601	5643	-	ENSMUSG00000039081	Zfp503	protein_coding	zinc finger protein 503 [Source:MGI Symbol;Acc:MGI:1353644]	218820	-0.866063	2.19091	-3.21542	0.0021323	0.0234432
14	121286343	121380011	93669	-	ENSMUSG00000063410	Stk24	protein_coding	serine/threonine kinase 24 [Source:MGI Symbol;Acc:MGI:2385007]	223255	0.322039	7.22684	3.15358	0.00233773	0.0248471
14	8431192	8666240	235049	-	ENSMUSG00000021747	4930452B06Rik	protein_coding	RIKEN cDNA 4930452B06 gene [Source:MGI Symbol;Acc:MGI:1926154]	74430	-0.835597	-0.347422	-3.15769	0.00243252	0.0254832
14	61602839	61682373	79535	-	ENSMUSG00000097589	Dleu2	processed_transcript	deleted in lymphocytic leukemia, 2 [Source:MGI Symbol;Acc:MGI:1934030]	NA	-0.888104	0.877723	-3.1309	0.00262275	0.0266559
14	43275036	43306011	30976	+	ENSMUSG00000115483	Gm9732	protein_coding	predicted gene 9732 [Source:MGI Symbol;Acc:MGI:3796514]	NA	1.12753	-0.470862	3.14044	0.00271102	0.0272257
14	73025603	73049114	23512	-	ENSMUSG00000033470	Cysltr2	protein_coding	cysteinyl leukotriene receptor 2 [Source:MGI Symbol;Acc:MGI:1917336]	70086	-1.28607	4.26275	-3.09862	0.00311274	0.0300478
14	27428834	27483555	54722	+	ENSMUSG00000040651	Tasor	protein_coding	transcription activation suppressor [Source:MGI Symbol;Acc:MGI:1921694]	218850	0.614973	3.22989	3.02681	0.00318633	0.0305135
14	54621433	54629556	8124	+	ENSMUSG00000072423	Psmb11	protein_coding	proteasome (prosome, macropain) subunit, beta type, 11 [Source:MGI Symbol;Acc:MGI:1921152]	73902	1.63836	-0.550298	3.11622	0.00320955	0.0306535
14	122181704	122402234	220531	+	ENSMUSG00000025545	Clybl	protein_coding	citrate lyase beta like [Source:MGI Symbol;Acc:MGI:1916884]	69634	0.435471	4.11916	3.01549	0.00322559	0.0307234
14	60373259	60388197	14939	+	ENSMUSG00000021986	Amer2	protein_coding	APC membrane recruitment 2 [Source:MGI Symbol;Acc:MGI:1919375]	72125	-1.36241	0.357857	-3.0795	0.00331666	0.0312641
14	18204054	18239127	35074	-	ENSMUSG00000021775	Nr1d2	protein_coding	nuclear receptor subfamily 1, group D, member 2 [Source:MGI Symbol;Acc:MGI:2449205]	353187	-0.450616	3.31862	-2.97277	0.00356163	0.0327627
14	55784995	55788865	3871	-	ENSMUSG00000022221	Ripk3	protein_coding	receptor-interacting serine-threonine kinase 3 [Source:MGI Symbol;Acc:MGI:2154952]	56532	-0.776262	1.11097	-2.97234	0.00372658	0.0336734
14	40993740	41013788	20049	-	ENSMUSG00000021792	Prxl2a	protein_coding	peroxiredoxin like 2A [Source:MGI Symbol;Acc:MGI:1917814]	70564	-0.7067	4.14255	-2.95981	0.00378273	0.0339603
14	55823144	55833943	10800	+	ENSMUSG00000023411	Nfatc4	protein_coding	nuclear factor of activated T cells, cytoplasmic, calcineurin dependent 4 [Source:MGI Symbol;Acc:MGI:1920431]	73181	-0.815203	2.17162	-2.9425	0.00403334	0.0353604
14	77024200	77036904	12705	-	ENSMUSG00000044350	Lacc1	protein_coding	laccase domain containing 1 [Source:MGI Symbol;Acc:MGI:2445077]	210808	-0.821813	1.27765	-2.92238	0.00423563	0.0365721
14	25694154	25700468	6315	+	ENSMUSG00000021868	Ppif	protein_coding	peptidylprolyl isomerase F (cyclophilin F) [Source:MGI Symbol;Acc:MGI:2145814]	105675	0.457391	3.93838	2.89513	0.00425799	0.0367204
14	70474558	70520234	45677	-	ENSMUSG00000022098	Bmp1	protein_coding	bone morphogenetic protein 1 [Source:MGI Symbol;Acc:MGI:88176]	12153	-0.42235	7.95207	-2.87016	0.00450175	0.0382154
14	70164218	70177681	13464	-	ENSMUSG00000022090	Pdlim2	protein_coding	PDZ and LIM domain 2 [Source:MGI Symbol;Acc:MGI:2384850]	213019	0.393873	5.95396	2.84462	0.00476781	0.0396222
14	3262340	3305832	43493	+	ENSMUSG00000079407	1700110I01Rik	lincRNA	RIKEN cDNA 1700110I01 gene [Source:MGI Symbol;Acc:MGI:1920799]	NA	1.22617	-0.480891	2.89948	0.00495758	0.0405177
14	75845093	75848525	3433	+	ENSMUSG00000060126	Tpt1	protein_coding	tumor protein, translationally-controlled 1 [Source:MGI Symbol;Acc:MGI:104890]	22070	-0.382293	10.0112	-2.81787	0.00506521	0.0410905
14	45283087	45318771	35685	-	ENSMUSG00000021831	Ero1l	protein_coding	ERO1-like (S. cerevisiae) [Source:MGI Symbol;Acc:MGI:1354385]	50527	0.409523	7.78136	2.80556	0.00521153	0.0419001
14	65598546	65648531	49986	+	ENSMUSG00000061356	Nuggc	protein_coding	nuclear GTPase, germinal center associated [Source:MGI Symbol;Acc:MGI:2685446]	100503545	0.695417	1.43312	2.73482	0.00635839	0.0477938
14	47298266	47323204	24939	+	ENSMUSG00000021840	Mapk1ip1l	protein_coding	mitogen-activated protein kinase 1 interacting protein 1-like [Source:MGI Symbol;Acc:MGI:2444022]	218975	0.36369	5.80426	2.70365	0.00654875	0.048737
13	56438355	56474239	35885	+	ENSMUSG00000021509	Slc25a48	protein_coding	solute carrier family 25, member 48 [Source:MGI Symbol;Acc:MGI:2145373]	328258	1.28359	5.35139	7.00272	2.83906e-07	0.000290823
13	33149275	33159742	10468	-	ENSMUSG00000021404	Serpinb9c	protein_coding	serine (or cysteine) peptidase inhibitor, clade B, member 9c [Source:MGI Symbol;Acc:MGI:894669]	20707	0.927925	6.26678	6.66672	5.82184e-07	0.000424607
13	27633366	27642493	9128	-	ENSMUSG00000006488	Prl7a1	protein_coding	prolactin family 7, subfamily a, member 1 [Source:MGI Symbol;Acc:MGI:1206572]	19113	1.87685	6.98609	6.66608	6.3788e-07	0.000444081
13	13182715	13191923	9209	+	ENSMUSG00000055360	Prl2c5	protein_coding	prolactin family 2, subfamily c, member 5 [Source:MGI Symbol;Acc:MGI:1858413]	107849	0.954983	9.59457	6.35333	1.1795e-06	0.00051537
13	31625816	31631403	5588	+	ENSMUSG00000038402	Foxf2	protein_coding	forkhead box F2 [Source:MGI Symbol;Acc:MGI:1347479]	14238	-1.51604	1.3785	-6.34231	1.27199e-06	0.00051537
13	52583173	52648792	65620	+	ENSMUSG00000021457	Syk	protein_coding	spleen tyrosine kinase [Source:MGI Symbol;Acc:MGI:99515]	20963	-0.871048	4.00259	-6.28496	1.37215e-06	0.00051537
13	27658584	27668036	9453	-	ENSMUSG00000046899	Prl7a2	protein_coding	prolactin family 7, subfamily a, member 2 [Source:MGI Symbol;Acc:MGI:1206571]	19114	1.59941	10.4285	6.20369	1.76457e-06	0.000587525
13	33324077	33335370	11294	+	ENSMUSG00000038327	Serpinb9f	protein_coding	serine (or cysteine) peptidase inhibitor, clade B, member 9f [Source:MGI Symbol;Acc:MGI:894671]	20709	0.746384	5.8581	6.06303	2.2704e-06	0.000690277
13	93771630	93943016	171387	+	ENSMUSG00000042082	Arsb	protein_coding	arylsulfatase B [Source:MGI Symbol;Acc:MGI:88075]	11881	0.903116	5.6249	5.97058	2.82757e-06	0.000706661
13	28142484	28151611	9128	+	ENSMUSG00000017064	Prl5a1	protein_coding	prolactin family 5, subfamily a, member 1 [Source:MGI Symbol;Acc:MGI:106332]	28078	-2.35376	6.35256	-5.97667	3.27701e-06	0.000722552
13	6548149	6580515	32367	+	ENSMUSG00000021193	Pitrm1	protein_coding	pitrilysin metallepetidase 1 [Source:MGI Symbol;Acc:MGI:1916867]	69617	1.06779	7.12382	5.8651	3.65297e-06	0.000756066
13	33192959	33203129	10171	+	ENSMUSG00000054266	Serpinb9d	protein_coding	serine (or cysteine) peptidase inhibitor, clade B, member 9d [Source:MGI Symbol;Acc:MGI:894667]	20726	1.49136	5.58108	5.73654	5.16762e-06	0.000851047
13	33249612	33260850	11239	+	ENSMUSG00000062342	Serpinb9e	protein_coding	serine (or cysteine) peptidase inhibitor, clade B, member 9e [Source:MGI Symbol;Acc:MGI:894672]	20710	1.00398	7.7541	5.68088	5.59249e-06	0.000856545
13	27196659	27203749	7091	+	ENSMUSG00000017922	Prl3c1	protein_coding	prolactin family 3, subfamily c, member 1 [Source:MGI Symbol;Acc:MGI:1351649]	27372	1.61314	4.64911	5.68256	5.96206e-06	0.000886553
13	27706337	27716736	10400	-	ENSMUSG00000021348	Prl7d1	protein_coding	prolactin family 7, subfamily d, member 1 [Source:MGI Symbol;Acc:MGI:97619]	18814	0.732806	10.0595	5.59037	6.81759e-06	0.000946664
13	42680623	43138526	457904	+	ENSMUSG00000054728	Phactr1	protein_coding	phosphatase and actin regulator 1 [Source:MGI Symbol;Acc:MGI:2659021]	218194	0.959674	7.17419	5.5458	7.66181e-06	0.00098612
13	12790816	12800079	9264	-	ENSMUSG00000056457	Prl2c3	protein_coding	prolactin family 2, subfamily c, member 3 [Source:MGI Symbol;Acc:MGI:1341833]	c(18812, 26421)	1.05372	9.38022	5.13993	2.03212e-05	0.00170077
13	60955219	60959948	4730	+	ENSMUSG00000114502	Gm40975	lincRNA	predicted gene, 40975 [Source:MGI Symbol;Acc:MGI:5623860]	NA	1.6081	1.83905	5.16407	2.05985e-05	0.00170642
13	24501525	24733816	232292	+	ENSMUSG00000036006	Ripor2	protein_coding	RHO family interacting cell polarization regulator 2 [Source:MGI Symbol;Acc:MGI:2444879]	193385	-1.13594	3.52031	-5.07632	2.38988e-05	0.00181622
13	51685529	51793747	108219	-	ENSMUSG00000021451	Sema4d	protein_coding	sema domain, immunoglobulin domain (Ig), transmembrane domain (TM) and short cytoplasmic domain, (semaphorin) 4D [Source:MGI Symbol;Acc:MGI:109244]	c(20354, 115488166)	0.808952	5.67378	4.94046	3.21749e-05	0.0020766
13	44185760	44216487	30728	-	ENSMUSG00000113186	A330076C08Rik	lincRNA	RIKEN cDNA A330076C08 gene [Source:MGI Symbol;Acc:MGI:2443693]	NA	1.22396	1.49063	4.70798	5.91089e-05	0.00288153
13	91460283	91703429	243147	+	ENSMUSG00000003992	Ssbp2	protein_coding	single-stranded DNA binding protein 2 [Source:MGI Symbol;Acc:MGI:1914220]	66970	-1.01968	2.17932	-4.69306	5.9684e-05	0.00289278
13	59634626	59675811	41186	-	ENSMUSG00000021556	Golm1	protein_coding	golgi membrane protein 1 [Source:MGI Symbol;Acc:MGI:1917329]	105348	0.519523	7.09566	4.57957	7.61637e-05	0.00339106
13	27849342	27857788	8447	+	ENSMUSG00000062551	Prl2c1	protein_coding	Prolactin family 2, subfamily c, member 1 [Source:MGI Symbol;Acc:MGI:3649927]	666317	1.39023	4.26883	4.59047	8.08093e-05	0.00350693
13	54789377	54796776	7400	+	ENSMUSG00000025875	Tspan17	protein_coding	tetraspanin 17 [Source:MGI Symbol;Acc:MGI:1921507]	74257	-1.01285	1.60711	-4.56085	8.23042e-05	0.00355091
13	23456992	23465901	8910	-	ENSMUSG00000000706	Btn1a1	protein_coding	butyrophilin, subfamily 1, member A1 [Source:MGI Symbol;Acc:MGI:103118]	12231	-0.856402	1.89729	-4.48897	9.64204e-05	0.00395615
13	43195245	43304172	108928	-	ENSMUSG00000051335	Gfod1	protein_coding	glucose-fructose oxidoreductase domain containing 1 [Source:MGI Symbol;Acc:MGI:2145304]	328232	0.626683	4.43799	4.4737	9.86436e-05	0.00398635
13	108449948	109953461	1503514	+	ENSMUSG00000021699	Pde4d	protein_coding	phosphodiesterase 4D, cAMP specific [Source:MGI Symbol;Acc:MGI:99555]	238871	-0.769423	3.2737	-4.43351	0.000109562	0.00418703
13	33917918	34002794	84877	-	ENSMUSG00000060147	Serpinb6a	protein_coding	serine (or cysteine) peptidase inhibitor, clade B, member 6a [Source:MGI Symbol;Acc:MGI:103123]	20719	-0.691073	6.35077	-4.42659	0.000110884	0.00418703
13	58233346	58275699	42354	-	ENSMUSG00000021552	Gkap1	protein_coding	G kinase anchoring protein 1 [Source:MGI Symbol;Acc:MGI:1891694]	56278	0.601348	4.24484	4.42471	0.000111004	0.00418703
13	44249460	44280449	30990	-	ENSMUSG00000113689	Gm29676	lincRNA	predicted gene, 29676 [Source:MGI Symbol;Acc:MGI:5588835]	NA	1.03505	1.6142	4.40967	0.000119424	0.00431928
13	49421249	49464573	43325	+	ENSMUSG00000021385	Ippk	protein_coding	inositol 1,3,4,5,6-pentakisphosphate 2-kinase [Source:MGI Symbol;Acc:MGI:1922928]	75678	0.636929	4.87306	4.26245	0.000164782	0.00520151
13	41865915	41913092	47178	+	ENSMUSG00000113856	Gm10790	processed_transcript	predicted gene 10790 [Source:MGI Symbol;Acc:MGI:3641845]	NA	1.86457	0.619886	4.22864	0.000213107	0.00611511
13	75869537	75943925	74389	-	ENSMUSG00000021589	Rhobtb3	protein_coding	Rho-related BTB domain containing 3 [Source:MGI Symbol;Acc:MGI:1920546]	73296	-0.755665	0.617823	-4.09923	0.000246892	0.0065309
13	93674433	93752833	78401	+	ENSMUSG00000042102	Dmgdh	protein_coding	dimethylglycine dehydrogenase precursor [Source:MGI Symbol;Acc:MGI:1921379]	74129	-0.830848	2.56108	-4.00104	0.000316018	0.00750408
13	54371349	54383917	12569	+	ENSMUSG00000025867	Cplx2	protein_coding	complexin 2 [Source:MGI Symbol;Acc:MGI:104726]	12890	-1.06841	2.17755	-3.97595	0.000347805	0.00798648
13	96924689	96950906	26218	+	ENSMUSG00000091387	Gcnt4	protein_coding	glucosaminyl (N-acetyl) transferase 4, core 2 (beta-1,6-N-acetylglucosaminyltransferase) [Source:MGI Symbol;Acc:MGI:2684919]	218476	1.12588	2.71438	3.92562	0.000397505	0.00861934
13	12996125	13005383	9259	-	ENSMUSG00000079092	Prl2c2	protein_coding	prolactin family 2, subfamily c, member 2 [Source:MGI Symbol;Acc:MGI:97618]	18811	0.846584	6.67897	3.89027	0.000414789	0.00879904
13	52835119	52929681	94563	-	ENSMUSG00000021460	Auh	protein_coding	AU RNA binding protein/enoyl-coenzyme A hydratase [Source:MGI Symbol;Acc:MGI:1338011]	11992	-0.570863	3.65566	-3.87274	0.000422816	0.00890763
13	3837757	3838673	917	+	ENSMUSG00000033765	Calm4	protein_coding	calmodulin 4 [Source:MGI Symbol;Acc:MGI:1931464]	80796	-1.30467	1.54273	-3.90252	0.000434724	0.00902199
13	54949411	55006018	56608	+	ENSMUSG00000025876	Unc5a	protein_coding	unc-5 netrin receptor A [Source:MGI Symbol;Acc:MGI:894682]	107448	1.0355	3.46673	3.85895	0.000460915	0.00940093
13	33027416	33041884	14469	+	ENSMUSG00000021403	Serpinb9b	protein_coding	serine (or cysteine) peptidase inhibitor, clade B, member 9b [Source:MGI Symbol;Acc:MGI:894668]	20706	0.486866	7.23959	3.78395	0.000522725	0.0101087
13	51408639	51422797	14159	+	ENSMUSG00000067586	S1pr3	protein_coding	sphingosine-1-phosphate receptor 3 [Source:MGI Symbol;Acc:MGI:1339365]	13610	-1.24624	2.17053	-3.82057	0.000526396	0.0101194
13	97899469	98206439	306971	-	ENSMUSG00000021662	Arhgef28	protein_coding	Rho guanine nucleotide exchange factor (GEF) 28 [Source:MGI Symbol;Acc:MGI:1346016]	110596	-0.667472	2.37483	-3.73991	0.000586171	0.0107886
13	41182381	41220405	38025	-	ENSMUSG00000021364	Elovl2	protein_coding	elongation of very long chain fatty acids (FEN1/Elo2, SUR4/Elo3, yeast)-like 2 [Source:MGI Symbol;Acc:MGI:1858960]	54326	-1.45714	0.700611	-3.78346	0.000600411	0.0109215
13	48801750	48871119	69370	-	ENSMUSG00000038025	Phf2	protein_coding	PHD finger protein 2 [Source:MGI Symbol;Acc:MGI:1338034]	18676	0.3954	6.43522	3.69047	0.00065402	0.0114219
13	43784775	43803132	18358	+	ENSMUSG00000015396	Cd83	protein_coding	CD83 antigen [Source:MGI Symbol;Acc:MGI:1328316]	12522	0.764699	5.32719	3.68084	0.000682917	0.0117627
13	19591706	19619927	28222	-	ENSMUSG00000002808	Epdr1	protein_coding	ependymin related protein 1 (zebrafish) [Source:MGI Symbol;Acc:MGI:2145369]	105298	-1.37474	3.56116	-3.6854	0.000753237	0.0123724
13	16011851	16031621	19771	+	ENSMUSG00000041324	Inhba	protein_coding	inhibin beta-A [Source:MGI Symbol;Acc:MGI:96570]	16323	-1.28184	8.15001	-3.66661	0.000774719	0.0125297
13	27506968	27513217	6250	-	ENSMUSG00000021346	Prl8a8	protein_coding	prolactin family 8, subfamily a, member 81 [Source:MGI Symbol;Acc:MGI:1921438]	74188	0.724034	11.9732	3.5898	0.000846876	0.0131283
13	30336441	30382867	46427	+	ENSMUSG00000049115	Agtr1a	protein_coding	angiotensin II receptor, type 1a [Source:MGI Symbol;Acc:MGI:87964]	11607	-1.37937	2.83588	-3.63186	0.000860443	0.0131948
13	114833081	114932100	99020	-	ENSMUSG00000015533	Itga2	protein_coding	integrin alpha 2 [Source:MGI Symbol;Acc:MGI:96600]	16398	-0.925389	5.5349	-3.55845	0.000941957	0.0139391
13	28016212	28023559	7348	+	ENSMUSG00000005891	Prl4a1	protein_coding	prolactin family 4, subfamily a, member 1 [Source:MGI Symbol;Acc:MGI:1206587]	19110	1.1189	5.00624	3.55713	0.000981135	0.0142979
13	56609523	56639562	30040	+	ENSMUSG00000035493	Tgfbi	protein_coding	transforming growth factor, beta induced [Source:MGI Symbol;Acc:MGI:99959]	21810	-1.1088	4.87476	-3.5343	0.00103541	0.0148208
13	23738808	23740367	1560	+	ENSMUSG00000036181	H1f2	protein_coding	H1.2 linker histone, cluster member [Source:MGI Symbol;Acc:MGI:1931526]	50708	-0.553855	5.4901	-3.49658	0.0010442	0.0149049
13	43615710	43670945	55236	+	ENSMUSG00000044164	Rnf182	protein_coding	ring finger protein 182 [Source:MGI Symbol;Acc:MGI:3045355]	328234	-1.80768	0.124013	-3.57546	0.0010698	0.0151293
13	41025008	41079706	54699	-	ENSMUSG00000021363	Mak	protein_coding	male germ cell-associated kinase [Source:MGI Symbol;Acc:MGI:96913]	17152	0.834931	0.923209	3.48561	0.00110633	0.0154462
13	100017994	100104070	86077	-	ENSMUSG00000049658	Bdp1	protein_coding	B double prime 1, subunit of RNA polymerase III transcription initiation factor IIIB [Source:MGI Symbol;Acc:MGI:1347077]	544971	0.667766	3.82383	3.3318	0.00156193	0.0194018
13	69702832	69739889	37058	-	ENSMUSG00000052981	Ube2ql1	protein_coding	ubiquitin-conjugating enzyme E2Q family-like 1 [Source:MGI Symbol;Acc:MGI:1924230]	76980	-1.34197	2.88165	-3.32784	0.00180312	0.0210385
13	35958839	35970388	11550	+	ENSMUSG00000050423	Ppp1r3g	protein_coding	protein phosphatase 1, regulatory subunit 3G [Source:MGI Symbol;Acc:MGI:1923737]	76487	0.627212	3.02378	3.24667	0.00190302	0.0218983
13	97067286	97131013	63728	+	ENSMUSG00000041817	Fam169a	protein_coding	family with sequence similarity 169, member A [Source:MGI Symbol;Acc:MGI:2444268]	320557	0.856739	2.27106	3.23863	0.00201307	0.0227041
13	42301476	42307990	6515	+	ENSMUSG00000021367	Edn1	protein_coding	endothelin 1 [Source:MGI Symbol;Acc:MGI:95283]	13614	-0.882476	1.88013	-3.2157	0.00213821	0.0234432
13	27292616	27306032	13417	+	ENSMUSG00000086698	4930511O05Rik	lincRNA	RIKEN cDNA 4930511O05 gene [Source:MGI Symbol;Acc:MGI:1922371]	NA	-1.31187	-0.390483	-3.24629	0.00218649	0.0237843
13	74350309	74365783	15475	+	ENSMUSG00000021578	Ccdc127	protein_coding	coiled-coil domain containing 127 [Source:MGI Symbol;Acc:MGI:1914683]	67433	0.405996	5.2741	3.1757	0.00222092	0.0239547
13	95323612	95337841	14230	+	ENSMUSG00000041995	Zbed3	protein_coding	zinc finger, BED type containing 3 [Source:MGI Symbol;Acc:MGI:1919364]	72114	-0.714547	2.83195	-3.16261	0.00235008	0.0249438
13	13034858	13038936	4079	+	ENSMUSG00000113049	Gm48544	lincRNA	predicted gene, 48544 [Source:MGI Symbol;Acc:MGI:6098092]	NA	1.46301	0.0832309	3.21224	0.00245346	0.025615
13	38006052	38037069	31018	-	ENSMUSG00000044566	Cage1	protein_coding	cancer antigen 1 [Source:MGI Symbol;Acc:MGI:1918463]	71213	-0.672262	-0.17303	-3.11195	0.00263117	0.0267235
13	95024454	95250336	225883	-	ENSMUSG00000021684	Pde8b	protein_coding	phosphodiesterase 8B [Source:MGI Symbol;Acc:MGI:2443999]	218461	-0.958691	0.109035	-3.12754	0.00268702	0.027087
13	51645232	51650660	5429	+	ENSMUSG00000062248	Cks2	protein_coding	CDC28 protein kinase regulatory subunit 2 [Source:MGI Symbol;Acc:MGI:1913447]	66197	-0.642858	1.32646	-3.10109	0.00268778	0.027087
13	66281136	66284067	2932	-	ENSMUSG00000114550	Gm46426	processed_pseudogene	predicted gene, 46426 [Source:MGI Symbol;Acc:MGI:5826063]	NA	1.2798	-1.52315	3.15849	0.00268819	0.027087
13	18121098	18397686	276589	-	ENSMUSG00000009734	Pou6f2	protein_coding	POU domain, class 6, transcription factor 2 [Source:MGI Symbol;Acc:MGI:2443631]	218030	1.32984	-0.639435	3.12252	0.00296658	0.0290512
13	111580261	111644830	64570	+	ENSMUSG00000086649	Gm15286	processed_transcript	predicted gene 15286 [Source:MGI Symbol;Acc:MGI:3705204]	NA	1.01819	-0.526496	3.06023	0.00320306	0.0306421
13	100144063	100202092	58030	-	ENSMUSG00000078945	Naip2	protein_coding	NLR family, apoptosis inhibitory protein 2 [Source:MGI Symbol;Acc:MGI:1298226]	17948	-0.892007	0.307564	-2.99462	0.00363195	0.0331985
13	27345673	27354216	8544	+	ENSMUSG00000018259	Prl8a2	protein_coding	prolactin family 8, subfamily a, member 2 [Source:MGI Symbol;Acc:MGI:894281]	13529	-1.07685	9.5979	-3.01122	0.00365505	0.0333219
13	19623104	19632994	9891	+	ENSMUSG00000021319	Sfrp4	protein_coding	secreted frizzled-related protein 4 [Source:MGI Symbol;Acc:MGI:892010]	20379	-1.52802	6.17919	-3.05348	0.00365856	0.033331
13	35990861	35991520	660	-	ENSMUSG00000114251	Tmed10-ps	processed_pseudogene	transmembrane p24 trafficking protein 10, pseudogene [Source:MGI Symbol;Acc:MGI:3782198]	NA	-0.621117	1.85305	-2.96459	0.00368631	0.0334476
13	108214404	108285683	71280	+	ENSMUSG00000021696	Elovl7	protein_coding	ELOVL family member 7, elongation of long chain fatty acids (yeast) [Source:MGI Symbol;Acc:MGI:1921809]	74559	-0.980698	0.344787	-2.98701	0.00378052	0.0339603
13	24012344	24280795	268452	-	ENSMUSG00000021338	Carmil1	protein_coding	capping protein regulator and myosin 1 linker 1 [Source:MGI Symbol;Acc:MGI:1915982]	68732	0.64588	5.32954	2.95202	0.0038103	0.034108
13	28948919	28953713	4795	-	ENSMUSG00000076431	Sox4	protein_coding	SRY (sex determining region Y)-box 4 [Source:MGI Symbol;Acc:MGI:98366]	20677	-0.612688	5.50699	-2.94853	0.00382171	0.0341701
13	62964893	63326096	361204	+	ENSMUSG00000021458	Aopep	protein_coding	aminopeptidase O [Source:MGI Symbol;Acc:MGI:1919311]	72061	-0.465255	3.95371	-2.90077	0.00420498	0.0363862
13	58545399	58610877	65479	-	ENSMUSG00000021553	Slc28a3	protein_coding	solute carrier family 28 (sodium-coupled nucleoside transporter), member 3 [Source:MGI Symbol;Acc:MGI:2137361]	114304	1.79465	1.02588	2.99274	0.00445306	0.0378906
13	15813548	16023423	209876	-	ENSMUSG00000113701	B230303A05Rik	transcribed_processed_pseudogene	RIKEN cDNA B230303A05 gene [Source:MGI Symbol;Acc:MGI:3646895]	NA	-2.07477	-2.11059	-3.00812	0.00448063	0.0380829
13	27773495	27780804	7310	-	ENSMUSG00000060738	Prl7c1	protein_coding	prolactin family 7, subfamily c, member 1 [Source:MGI Symbol;Acc:MGI:1914755]	67505	1.46679	4.14012	2.95689	0.0045626	0.0385548
13	66163779	66165062	1284	+	ENSMUSG00000113477	Gm45965	processed_pseudogene	predicted gene, 45965 [Source:MGI Symbol;Acc:MGI:5825602]	NA	0.989992	-0.718007	2.90888	0.00456385	0.0385548
13	61195132	61203410	8279	-	ENSMUSG00000021441	Cts6	protein_coding	cathepsin 6 [Source:MGI Symbol;Acc:MGI:1889619]	58518	-0.598772	11.262	-2.85033	0.00478495	0.0396809
13	55209782	55318325	108544	+	ENSMUSG00000021488	Nsd1	protein_coding	nuclear receptor-binding SET-domain protein 1 [Source:MGI Symbol;Acc:MGI:1276545]	18193	0.430131	6.99397	2.83824	0.00484237	0.0399906
13	41016292	41022586	6295	+	ENSMUSG00000021361	Tmem14c	protein_coding	transmembrane protein 14C [Source:MGI Symbol;Acc:MGI:1913404]	66154	0.379954	6.22059	2.81949	0.00504648	0.0410273
13	60934155	60936625	2471	-	ENSMUSG00000044258	Ctla2a	protein_coding	cytotoxic T lymphocyte-associated protein 2 alpha [Source:MGI Symbol;Acc:MGI:88554]	13024	-1.117	8.56224	-2.8601	0.00529812	0.0424182
13	24596347	24604925	8579	-	ENSMUSG00000085603	Gm11346	transcribed_processed_pseudogene	predicted gene 11346 [Source:MGI Symbol;Acc:MGI:1923274]	NA	-0.986436	-0.415924	-2.8146	0.00570005	0.0446979
13	13437551	13512269	74719	+	ENSMUSG00000005397	Nid1	protein_coding	nidogen 1 [Source:MGI Symbol;Acc:MGI:97342]	18073	0.446114	9.93922	2.75675	0.00582793	0.0452635
13	58402248	58411148	8901	+	ENSMUSG00000035367	Rmi1	protein_coding	RecQ mediated genome instability 1 [Source:MGI Symbol;Acc:MGI:1921636]	74386	0.5825	3.08963	2.76295	0.00582999	0.0452635
13	9834469	9834525	57	-	ENSMUSG00000088609	Gm24187	miRNA	predicted gene, 24187 [Source:MGI Symbol;Acc:MGI:5453964]	NA	-0.967609	0.411659	-2.78614	0.00606425	0.0464633
13	41309581	41487362	177782	-	ENSMUSG00000021365	Nedd9	protein_coding	neural precursor cell expressed, developmentally down-regulated gene 9 [Source:MGI Symbol;Acc:MGI:97302]	18003	-0.437162	5.3176	-2.72601	0.00624254	0.047332
13	34627834	34653486	25653	-	ENSMUSG00000021411	Pxdc1	protein_coding	PX domain containing 1 [Source:MGI Symbol;Acc:MGI:1914145]	66895	0.362059	5.17164	2.70868	0.00647538	0.0484262
13	41001023	41013015	11993	+	ENSMUSG00000038683	Pak1ip1	protein_coding	PAK1 interacting protein 1 [Source:MGI Symbol;Acc:MGI:1915333]	68083	0.380135	5.48357	2.70766	0.00649212	0.0484804
13	45549755	45965008	415254	-	ENSMUSG00000046876	Atxn1	protein_coding	ataxin 1 [Source:MGI Symbol;Acc:MGI:104783]	20238	-0.489263	2.90597	-2.70489	0.00657062	0.0488522
12	16535669	16646966	111298	-	ENSMUSG00000020593	Lpin1	protein_coding	lipin 1 [Source:MGI Symbol;Acc:MGI:1891340]	14245	-1.26715	4.04981	-8.25585	2.0314e-08	0.000174528
12	111039351	111115901	76551	+	ENSMUSG00000037896	Rcor1	protein_coding	REST corepressor 1 [Source:MGI Symbol;Acc:MGI:106340]	217864	0.655478	6.81996	6.31584	1.27191e-06	0.00051537
12	90724552	90738438	13887	-	ENSMUSG00000007682	Dio2	protein_coding	deiodinase, iodothyronine, type II [Source:MGI Symbol;Acc:MGI:1338833]	13371	-2.61238	2.50119	-5.81924	4.88358e-06	0.000837197
12	113254830	113260236	5407	-	ENSMUSG00000095079	Igha	IG_C_gene	immunoglobulin heavy constant alpha [Source:MGI Symbol;Acc:MGI:96444]	NA	-1.68491	0.85711	-5.41035	1.15072e-05	0.0013009
12	86056745	86079041	22297	-	ENSMUSG00000021253	Tgfb3	protein_coding	transforming growth factor, beta 3 [Source:MGI Symbol;Acc:MGI:98727]	21809	0.697219	6.31925	5.01071	2.70285e-05	0.0019154
12	70912259	70914485	2227	+	ENSMUSG00000113707	Gm10457	lincRNA	predicted gene 10457 [Source:MGI Symbol;Acc:MGI:3642070]	NA	2.33899	-1.38437	5.0307	3.14499e-05	0.00206881
12	112106679	112127559	20881	+	ENSMUSG00000037686	Aspg	protein_coding	asparaginase [Source:MGI Symbol;Acc:MGI:2144822]	104816	-1.07131	2.86714	-4.48155	0.000100654	0.00404625
12	3806007	3914443	108437	+	ENSMUSG00000020661	Dnmt3a	protein_coding	DNA methyltransferase 3A [Source:MGI Symbol;Acc:MGI:1261827]	13435	0.415145	7.65123	4.30805	0.00014696	0.00491451
12	117804289	117878706	74418	+	ENSMUSG00000021175	Cdca7l	protein_coding	cell division cycle associated 7 like [Source:MGI Symbol;Acc:MGI:2384982]	217946	1.76825	-1.0891	4.29231	0.000179243	0.0055237
12	80107754	80113013	5260	-	ENSMUSG00000021127	Zfp36l1	protein_coding	zinc finger protein 36, C3H type-like 1 [Source:MGI Symbol;Acc:MGI:107946]	12192	-0.956067	5.64025	-4.16593	0.000214594	0.00614342
12	105616136	105685211	69076	-	ENSMUSG00000041341	Atg2b	protein_coding	autophagy related 2B [Source:MGI Symbol;Acc:MGI:1923809]	76559	0.675709	6.11466	4.14233	0.000221042	0.00624626
12	75308322	75401456	93135	+	ENSMUSG00000046768	Rhoj	protein_coding	ras homolog family member J [Source:MGI Symbol;Acc:MGI:1931551]	80837	-1.03224	4.57832	-4.14857	0.000226368	0.00628194
12	50341231	50649098	307868	-	ENSMUSG00000002688	Prkd1	protein_coding	protein kinase D1 [Source:MGI Symbol;Acc:MGI:99879]	18760	-0.934251	1.10612	-4.11202	0.000244137	0.0065143
12	73901375	73947530	46156	+	ENSMUSG00000021109	Hif1a	protein_coding	hypoxia inducible factor 1, alpha subunit [Source:MGI Symbol;Acc:MGI:106918]	15251	0.440465	6.85032	3.96014	0.000341421	0.0079104
12	58264720	58269290	4571	-	ENSMUSG00000045930	Clec14a	protein_coding	C-type lectin domain family 14, member a [Source:MGI Symbol;Acc:MGI:1914114]	66864	-1.10165	5.00632	-3.97236	0.000352863	0.00803039
12	24708241	24714146	5906	+	ENSMUSG00000020649	Rrm2	protein_coding	ribonucleotide reductase M2 [Source:MGI Symbol;Acc:MGI:98181]	20135	-0.855322	6.25643	-3.91931	0.000386878	0.00847359
12	87425840	87444017	18178	-	ENSMUSG00000079036	Alkbh1	protein_coding	alkB homolog 1, histone H2A dioxygenase [Source:MGI Symbol;Acc:MGI:2384034]	c(211064, 654309)	0.697607	2.05229	3.893	0.000405579	0.00867138
12	112808937	112816252	7316	+	ENSMUSG00000037594	Clba1	protein_coding	clathrin binding box of aftiphilin containing 1 [Source:MGI Symbol;Acc:MGI:2443738]	217887	-0.875908	1.10593	-3.86546	0.000442394	0.00915636
12	90998492	91384409	385918	-	ENSMUSG00000061533	Cep128	protein_coding	centrosomal protein 128 [Source:MGI Symbol;Acc:MGI:1922466]	75216	-1.00413	3.05769	-3.82461	0.000498716	0.00984322
12	108370957	108539617	168661	+	ENSMUSG00000058070	Eml1	protein_coding	echinoderm microtubule associated protein like 1 [Source:MGI Symbol;Acc:MGI:1915769]	68519	-0.835394	2.93625	-3.80581	0.000508778	0.00994493
12	32173473	32208659	35187	-	ENSMUSG00000020573	Pik3cg	protein_coding	phosphatidylinositol-4,5-bisphosphate 3-kinase catalytic subunit gamma [Source:MGI Symbol;Acc:MGI:1353576]	30955	-0.851158	0.807882	-3.77336	0.000551788	0.0104336
12	70522598	70544587	21990	+	ENSMUSG00000113302	Gm32219	lincRNA	predicted gene, 32219 [Source:MGI Symbol;Acc:MGI:5591378]	NA	-1.35652	0.0944456	-3.79044	0.000579043	0.0107109
12	110994398	111013869	19472	+	ENSMUSG00000113056	6030440G07Rik	lincRNA	RIKEN cDNA 6030440G07 gene [Source:MGI Symbol;Acc:MGI:1925128]	NA	1.97873	-0.724655	3.80048	0.000628894	0.0111872
12	25093799	25097140	3342	-	ENSMUSG00000020644	Id2	protein_coding	inhibitor of DNA binding 2 [Source:MGI Symbol;Acc:MGI:96397]	15902	0.558813	5.98323	3.67294	0.000684287	0.0117627
12	119158022	119238802	80781	-	ENSMUSG00000025321	Itgb8	protein_coding	integrin beta 8 [Source:MGI Symbol;Acc:MGI:1338035]	320910	-1.45484	4.56511	-3.71242	0.000715489	0.0120608
12	88175589	88182108	6520	-	ENSMUSG00000066027	Gm10436	protein_coding	predicted gene 10436 [Source:MGI Symbol;Acc:MGI:3704393]	100039315	1.33738	-1.31212	3.67504	0.000767138	0.0124813
12	70909474	70912151	2678	-	ENSMUSG00000113584	Gm46355	lincRNA	predicted gene, 46355 [Source:MGI Symbol;Acc:MGI:5825992]	NA	1.7454	-1.24213	3.61369	0.000962997	0.0141548
12	108678711	108702315	23605	-	ENSMUSG00000021263	Degs2	protein_coding	delta(4)-desaturase, sphingolipid 2 [Source:MGI Symbol;Acc:MGI:1917309]	70059	-0.897435	4.69436	-3.51822	0.00103343	0.0148208
12	4247362	4477182	229821	-	ENSMUSG00000020647	Ncoa1	protein_coding	nuclear receptor coactivator 1 [Source:MGI Symbol;Acc:MGI:1276523]	17977	-0.578338	2.85788	-3.49855	0.00104073	0.0148692
12	112976482	112978945	2464	+	ENSMUSG00000002803	Btbd6	protein_coding	BTB (POZ) domain containing 6 [Source:MGI Symbol;Acc:MGI:3026623]	399566	-0.663654	1.75665	-3.48035	0.00109464	0.015353
12	19434529	19435161	633	+	ENSMUSG00000116775	Gm49769	lincRNA	predicted gene, 49769 [Source:MGI Symbol;Acc:MGI:6215281]	NA	-1.45784	-0.746542	-3.51699	0.00116005	0.0159135
12	78888691	78906964	18274	-	ENSMUSG00000021118	Plek2	protein_coding	pleckstrin 2 [Source:MGI Symbol;Acc:MGI:1351466]	27260	-0.84134	0.606454	-3.44086	0.00123396	0.0164915
12	112653821	112674884	21064	-	ENSMUSG00000001729	Akt1	protein_coding	thymoma viral proto-oncogene 1 [Source:MGI Symbol;Acc:MGI:87986]	11651	0.438883	8.56886	3.37479	0.00139016	0.0178024
12	98202294	98259459	57166	-	ENSMUSG00000021003	Galc	protein_coding	galactosylceramidase [Source:MGI Symbol;Acc:MGI:95636]	14420	-0.735896	4.7221	-3.37646	0.00141656	0.0179991
12	24665833	24681813	15981	-	ENSMUSG00000062563	Cys1	protein_coding	cystin 1 [Source:MGI Symbol;Acc:MGI:2177632]	12879	-0.987347	2.6518	-3.37101	0.00150294	0.0188836
12	8771323	8793715	22393	+	ENSMUSG00000020592	Sdc1	protein_coding	syndecan 1 [Source:MGI Symbol;Acc:MGI:1349162]	20969	0.50148	6.64436	3.3298	0.001549	0.0192726
12	54645392	54656573	11182	-	ENSMUSG00000044408	Sptssa	protein_coding	serine palmitoyltransferase, small subunit A [Source:MGI Symbol;Acc:MGI:1913399]	104725	-0.933113	4.29348	-3.33314	0.00162875	0.019807
12	76324891	76334153	9263	+	ENSMUSG00000021057	Akap5	protein_coding	A kinase (PRKA) anchor protein 5 [Source:MGI Symbol;Acc:MGI:2685104]	238276	1.96764	-1.17853	3.41058	0.00164955	0.019862
12	36091835	36158080	66246	-	ENSMUSG00000020547	Bzw2	protein_coding	basic leucine zipper and W2 domains 2 [Source:MGI Symbol;Acc:MGI:1914162]	66912	-0.410015	4.13626	-3.20716	0.00206324	0.0229899
12	84100654	84111349	10696	+	ENSMUSG00000043487	Acot6	protein_coding	acyl-CoA thioesterase 6 [Source:MGI Symbol;Acc:MGI:1921287]	217700	-0.920054	0.306418	-3.22958	0.00208479	0.0231374
12	81026808	81186414	159607	+	ENSMUSG00000021136	Smoc1	protein_coding	SPARC related modular calcium binding 1 [Source:MGI Symbol;Acc:MGI:1929878]	64075	0.71768	6.48905	3.1753	0.00228164	0.0244204
12	100300770	100520826	220057	-	ENSMUSG00000033530	Ttc7b	protein_coding	tetratricopeptide repeat domain 7B [Source:MGI Symbol;Acc:MGI:2144724]	104718	0.471617	5.78425	3.1412	0.00241115	0.0253123
12	86700502	86726460	25959	-	ENSMUSG00000021257	Angel1	protein_coding	angel homolog 1 [Source:MGI Symbol;Acc:MGI:1915987]	68737	-0.555303	2.21292	-3.11953	0.00254914	0.0262207
12	80634022	80644341	10320	-	ENSMUSG00000021131	Erh	protein_coding	ERH mRNA splicing and mitosis factor [Source:MGI Symbol;Acc:MGI:108089]	13877	0.421911	3.52241	3.09603	0.00267524	0.0270455
12	37241641	37582202	340562	+	ENSMUSG00000050103	Agmo	protein_coding	alkylglycerol monooxygenase [Source:MGI Symbol;Acc:MGI:2442495]	319660	-1.11586	-0.105431	-3.13053	0.00276903	0.027593
12	40005447	40038025	32579	-	ENSMUSG00000047446	Arl4a	protein_coding	ADP-ribosylation factor-like 4A [Source:MGI Symbol;Acc:MGI:99437]	11861	-0.773	4.33684	-3.09669	0.00277658	0.0276323
12	31590967	31634658	43692	-	ENSMUSG00000020650	Bcap29	protein_coding	B cell receptor associated protein 29 [Source:MGI Symbol;Acc:MGI:101917]	12033	-0.499299	3.75505	-3.07857	0.00279395	0.0277613
12	111442469	111455018	12550	+	ENSMUSG00000021281	Tnfaip2	protein_coding	tumor necrosis factor, alpha-induced protein 2 [Source:MGI Symbol;Acc:MGI:104960]	21928	-0.466095	6.67957	-3.07756	0.00279612	0.0277613
12	27334264	27342574	8311	-	ENSMUSG00000063632	Sox11	protein_coding	SRY (sex determining region Y)-box 11 [Source:MGI Symbol;Acc:MGI:98359]	20666	-1.6685	3.86117	-3.15894	0.00290853	0.028666
12	105563226	105595237	32012	+	ENSMUSG00000021070	Bdkrb2	protein_coding	bradykinin receptor, beta 2 [Source:MGI Symbol;Acc:MGI:102845]	12062	0.686035	5.83755	3.00383	0.00339947	0.0318059
12	59066884	59073998	7115	+	ENSMUSG00000020994	Pnn	protein_coding	pinin [Source:MGI Symbol;Acc:MGI:1100514]	18949	0.34532	3.94445	2.98032	0.00349382	0.0323131
12	118231595	118234564	2970	-	ENSMUSG00000113831	Gm49602	lincRNA	predicted gene, 49602 [Source:MGI Symbol;Acc:MGI:6215013]	NA	-1.19467	-1.50207	-3.01447	0.00373317	0.033713
12	71831078	71992333	161256	+	ENSMUSG00000034574	Daam1	protein_coding	dishevelled associated activator of morphogenesis 1 [Source:MGI Symbol;Acc:MGI:1914596]	208846	0.388923	6.29136	2.94181	0.00381851	0.0341614
12	95692226	95785215	92990	+	ENSMUSG00000047414	Flrt2	protein_coding	fibronectin leucine rich transmembrane protein 2 [Source:MGI Symbol;Acc:MGI:3603594]	399558	-0.767761	3.9432	-2.95062	0.00391441	0.0347339
12	24830879	24964397	133519	+	ENSMUSG00000020646	Mboat2	protein_coding	membrane bound O-acyltransferase domain containing 2 [Source:MGI Symbol;Acc:MGI:1914466]	67216	0.8106	3.5568	2.95403	0.00392106	0.0347339
12	4862440	4874359	11920	-	ENSMUSG00000037336	Mfsd2b	protein_coding	major facilitator superfamily domain containing 2B [Source:MGI Symbol;Acc:MGI:3583946]	432628	-0.834422	0.763693	-2.95062	0.00397492	0.0350085
12	113325240	113330523	5284	-	ENSMUSG00000076614	Ighg1	IG_C_gene	immunoglobulin heavy constant gamma 1 (G1m marker) [Source:MGI Symbol;Acc:MGI:96446]	NA	0.96556	0.152896	2.95742	0.00404105	0.0354077
12	88722876	90334935	1612060	+	ENSMUSG00000066392	Nrxn3	protein_coding	neurexin III [Source:MGI Symbol;Acc:MGI:1096389]	18191	1.0528	0.359776	2.92873	0.00442487	0.0377324
12	113146316	113153879	7564	+	ENSMUSG00000006360	Crip1	protein_coding	cysteine-rich protein 1 (intestinal) [Source:MGI Symbol;Acc:MGI:88501]	12925	-0.515675	5.61252	-2.83739	0.00487846	0.0401733
12	113156421	113166048	9628	+	ENSMUSG00000037466	Tedc1	protein_coding	tubulin epsilon and delta complex 1 [Source:MGI Symbol;Acc:MGI:2144738]	104732	0.601757	1.27574	2.81029	0.00524822	0.0421288
12	91384563	91549808	165246	+	ENSMUSG00000020963	Tshr	protein_coding	thyroid stimulating hormone receptor [Source:MGI Symbol;Acc:MGI:98849]	22095	-1.63618	-1.59591	-2.87716	0.00571736	0.0447914
12	84149176	84218881	69706	-	ENSMUSG00000042507	Elmsan1	protein_coding	ELM2 and Myb/SANT-like domain containing 1 [Source:MGI Symbol;Acc:MGI:2685106]	238317	0.361256	6.07278	2.75282	0.00586481	0.0454183
12	58958383	59012017	53635	-	ENSMUSG00000020986	Sec23a	protein_coding	SEC23 homolog A, COPII coat complex component [Source:MGI Symbol;Acc:MGI:1349635]	20334	0.373794	6.19129	2.74479	0.00597266	0.0458993
12	54178981	54203860	24880	-	ENSMUSG00000035105	Egln3	protein_coding	egl-9 family hypoxia-inducible factor 3 [Source:MGI Symbol;Acc:MGI:1932288]	112407	-0.954973	6.24767	-2.76714	0.00631924	0.0476541
11	116530925	116536675	5751	+	ENSMUSG00000061878	Sphk1	protein_coding	sphingosine kinase 1 [Source:MGI Symbol;Acc:MGI:1316649]	20698	-1.28753	4.19003	-7.09294	2.33229e-07	0.000282757
11	76998603	77032340	33738	+	ENSMUSG00000020838	Slc6a4	protein_coding	solute carrier family 6 (neurotransmitter transporter, serotonin), member 4 [Source:MGI Symbol;Acc:MGI:96285]	15567	-1.6557	3.38347	-6.80267	4.58326e-07	0.000400183
11	78301529	78322457	20929	+	ENSMUSG00000002055	Spag5	protein_coding	sperm associated antigen 5 [Source:MGI Symbol;Acc:MGI:1927470]	54141	1.6108	2.37881	6.40644	1.11125e-06	0.000500826
11	75164565	75169519	4955	-	ENSMUSG00000043099	Hic1	protein_coding	hypermethylated in cancer 1 [Source:MGI Symbol;Acc:MGI:1338010]	15248	1.61006	5.21529	6.29673	1.42718e-06	0.000520445
11	79781979	79872394	90416	-	ENSMUSG00000086474	9130204K15Rik	lincRNA	RIKEN cDNA 9130204K15 gene [Source:MGI Symbol;Acc:MGI:2441733]	NA	1.32529	2.22524	6.08443	2.25105e-06	0.000690277
11	97598511	97622893	24383	+	ENSMUSG00000085860	2410003L11Rik	processed_transcript	RIKEN cDNA 2410003L11 gene [Source:MGI Symbol;Acc:MGI:1916979]	NA	1.38666	2.02051	5.95357	3.06985e-06	0.000715585
11	74898071	74909342	11272	+	ENSMUSG00000038335	Tsr1	protein_coding	TSR1 20S rRNA accumulation [Source:MGI Symbol;Acc:MGI:2144566]	104662	0.675504	3.91589	5.81218	4.05121e-06	0.000766029
11	106502147	106613423	111277	-	ENSMUSG00000040548	Tex2	protein_coding	testis expressed gene 2 [Source:MGI Symbol;Acc:MGI:102465]	21763	0.50444	7.07932	5.71355	5.09103e-06	0.000847545
11	3330401	3342971	12571	+	ENSMUSG00000034614	Pik3ip1	protein_coding	phosphoinositide-3-kinase interacting protein 1 [Source:MGI Symbol;Acc:MGI:1917016]	216505	-0.981787	4.43569	-5.6669	5.76953e-06	0.000874913
11	62574486	62600515	26030	+	ENSMUSG00000018507	Trpv2	protein_coding	transient receptor potential cation channel, subfamily V, member 2 [Source:MGI Symbol;Acc:MGI:1341836]	22368	1.12367	6.49216	5.5696	7.34624e-06	0.000983463
11	49015874	49051242	35369	-	ENSMUSG00000069892	9930111J21Rik2	protein_coding	RIKEN cDNA 9930111J21 gene 2 [Source:MGI Symbol;Acc:MGI:3711310]	245240	-1.15974	3.15806	-5.28005	1.46872e-05	0.00146617
11	53770014	53778374	8361	+	ENSMUSG00000018899	Irf1	protein_coding	interferon regulatory factor 1 [Source:MGI Symbol;Acc:MGI:96590]	16362	-1.09182	3.25683	-5.24764	1.57558e-05	0.00149811
11	7206086	7213923	7838	-	ENSMUSG00000020427	Igfbp3	protein_coding	insulin-like growth factor binding protein 3 [Source:MGI Symbol;Acc:MGI:96438]	16009	-1.44827	5.60835	-5.25389	1.62199e-05	0.00149811
11	107732357	107794557	62201	-	ENSMUSG00000020723	Cacng4	protein_coding	calcium channel, voltage-dependent, gamma subunit 4 [Source:MGI Symbol;Acc:MGI:1859167]	54377	1.89734	0.949371	5.25587	1.71808e-05	0.00156632
11	85832551	85841948	9398	+	ENSMUSG00000000093	Tbx2	protein_coding	T-box 2 [Source:MGI Symbol;Acc:MGI:98494]	21385	-1.02402	4.0759	-5.13996	2.02592e-05	0.00170077
11	32300069	32300873	805	+	ENSMUSG00000020295	Hbq1a	protein_coding	hemoglobin, theta 1A [Source:MGI Symbol;Acc:MGI:2685722]	216635	-3.18683	-2.10452	-5.23359	2.09923e-05	0.00171021
11	100462614	100472741	10128	-	ENSMUSG00000048732	Klhl11	protein_coding	kelch-like 11 [Source:MGI Symbol;Acc:MGI:2388648]	217194	0.777891	2.2352	5.11331	2.1204e-05	0.00171117
11	78962974	78984946	21973	-	ENSMUSG00000001123	Lgals9	protein_coding	lectin, galactose binding, soluble 9 [Source:MGI Symbol;Acc:MGI:109496]	16859	0.866143	8.85356	5.10848	2.15627e-05	0.00171117
11	119077573	119086221	8649	-	ENSMUSG00000039989	Cbx4	protein_coding	chromobox 4 [Source:MGI Symbol;Acc:MGI:1195985]	12418	0.736037	6.10385	5.00027	2.77573e-05	0.00194713
11	106318592	106353288	34697	-	ENSMUSG00000001027	Scn4a	protein_coding	sodium channel, voltage-gated, type IV, alpha [Source:MGI Symbol;Acc:MGI:98250]	110880	-1.49235	-1.21095	-5.03103	2.79687e-05	0.00194713
11	94343295	94392997	49703	-	ENSMUSG00000020865	Abcc3	protein_coding	ATP-binding cassette, sub-family C (CFTR/MRP), member 3 [Source:MGI Symbol;Acc:MGI:1923658]	76408	-1.19805	2.60104	-4.98831	2.97879e-05	0.00200983
11	3917192	3932159	14968	-	ENSMUSG00000020432	Tcn2	protein_coding	transcobalamin 2 [Source:MGI Symbol;Acc:MGI:98534]	21452	-0.519956	8.26095	-4.89894	3.52351e-05	0.00217605
11	4736892	4746778	9887	-	ENSMUSG00000009075	Cabp7	protein_coding	calcium binding protein 7 [Source:MGI Symbol;Acc:MGI:2183437]	192650	3.81236	-0.331556	4.88657	5.14041e-05	0.00266883
11	121146143	121148319	2177	+	ENSMUSG00000039329	Tex19.1	protein_coding	testis expressed gene 19.1 [Source:MGI Symbol;Acc:MGI:1920929]	73679	0.612913	4.67983	4.70007	5.69961e-05	0.00286214
11	102268743	102279462	10720	+	ENSMUSG00000034768	Asb16	protein_coding	ankyrin repeat and SOCS box-containing 16 [Source:MGI Symbol;Acc:MGI:2654437]	217217	2.05058	-0.926981	4.75086	6.01479e-05	0.00289694
11	118301069	118355740	54672	-	ENSMUSG00000017466	Timp2	protein_coding	tissue inhibitor of metalloproteinase 2 [Source:MGI Symbol;Acc:MGI:98753]	21858	-1.14572	8.66244	-4.68739	6.14844e-05	0.00293041
11	50025346	50125719	100374	+	ENSMUSG00000020376	Rnf130	protein_coding	ring finger protein 130 [Source:MGI Symbol;Acc:MGI:1891717]	59044	-1.05345	4.78621	-4.67638	6.24095e-05	0.00295302
11	69765912	69784023	18112	+	ENSMUSG00000018750	Zbtb4	protein_coding	zinc finger and BTB domain containing 4 [Source:MGI Symbol;Acc:MGI:1922830]	75580	-1.0248	4.38704	-4.52583	8.97812e-05	0.00379859
11	97799000	97838764	39765	+	ENSMUSG00000038366	Lasp1	protein_coding	LIM and SH3 protein 1 [Source:MGI Symbol;Acc:MGI:109656]	16796	0.552622	9.38308	4.49513	9.34858e-05	0.00389084
11	46325150	46389515	64366	-	ENSMUSG00000020395	Itk	protein_coding	IL2 inducible T cell kinase [Source:MGI Symbol;Acc:MGI:96621]	16428	2.60818	-0.794909	4.53105	0.000110987	0.00418703
11	46235531	46239872	4342	+	ENSMUSG00000048721	Fndc9	protein_coding	fibronectin type III domain containing 9 [Source:MGI Symbol;Acc:MGI:2443410]	320116	2.07212	-1.05909	4.47382	0.000119573	0.00431928
11	48978889	49135387	156499	+	ENSMUSG00000040328	Olfr56	protein_coding	olfactory receptor 56 [Source:MGI Symbol;Acc:MGI:1333785]	18356	-1.46815	-0.727919	-4.42521	0.000122902	0.00440834
11	3907021	3914664	7644	-	ENSMUSG00000048807	Slc35e4	protein_coding	solute carrier family 35, member E4 [Source:MGI Symbol;Acc:MGI:2144150]	103710	-0.897836	4.19858	-4.36455	0.000131123	0.00459562
11	97627389	97629702	2314	-	ENSMUSG00000043439	Epop	protein_coding	elongin BC and polycomb repressive complex 2 associated protein [Source:MGI Symbol;Acc:MGI:2143991]	103551	0.65084	6.25124	4.3469	0.000134307	0.00465395
11	96849870	96861203	11334	+	ENSMUSG00000018672	Copz2	protein_coding	coatomer protein complex, subunit zeta 2 [Source:MGI Symbol;Acc:MGI:1929008]	56358	0.642902	5.72761	4.32395	0.000141959	0.00479459
11	109669749	109722279	52531	-	ENSMUSG00000020614	Fam20a	protein_coding	family with sequence similarity 20, member A [Source:MGI Symbol;Acc:MGI:2388266]	208659	-1.15474	2.92141	-4.34016	0.000144085	0.00485013
11	9191942	9684259	492318	+	ENSMUSG00000004668	Abca13	protein_coding	ATP-binding cassette, sub-family A (ABC1), member 13 [Source:MGI Symbol;Acc:MGI:2388707]	268379	-1.96588	1.55453	-4.38082	0.000148304	0.0049376
11	117765988	117782198	16211	-	ENSMUSG00000025572	Tmc6	protein_coding	transmembrane channel-like gene family 6 [Source:MGI Symbol;Acc:MGI:1098686]	217353	-0.755674	3.63254	-4.30598	0.000149263	0.0049376
11	119913441	119919548	6108	+	ENSMUSG00000025371	Chmp6	protein_coding	charged multivesicular body protein 6 [Source:MGI Symbol;Acc:MGI:3583942]	208092	0.417138	5.52952	4.28355	0.000155952	0.00509289
11	103649570	103650579	1010	+	ENSMUSG00000046215	Rprml	protein_coding	reprimo-like [Source:MGI Symbol;Acc:MGI:2144486]	104582	2.48122	0.028097	4.37398	0.000161474	0.00516732
11	95957163	96005940	48778	-	ENSMUSG00000013415	Igf2bp1	protein_coding	insulin-like growth factor 2 mRNA binding protein 1 [Source:MGI Symbol;Acc:MGI:1890357]	140486	0.601397	5.54527	4.25871	0.000166069	0.00522281
11	117115168	117159268	44101	+	ENSMUSG00000020823	Sec14l1	protein_coding	SEC14-like lipid binding 1 [Source:MGI Symbol;Acc:MGI:1921386]	74136	0.464365	7.4691	4.23324	0.000176219	0.00544146
11	106156256	106160860	4605	-	ENSMUSG00000040699	Limd2	protein_coding	LIM domain containing 2 [Source:MGI Symbol;Acc:MGI:1915053]	67803	0.471613	5.79122	4.21987	0.000182036	0.00556962
11	54717456	54787675	70220	-	ENSMUSG00000052298	Cdc42se2	protein_coding	CDC42 small effector 2 [Source:MGI Symbol;Acc:MGI:1919979]	72729	0.557246	7.38255	4.19678	0.000192762	0.00574385
11	54054928	54069014	14087	-	ENSMUSG00000020388	Pdlim4	protein_coding	PDZ and LIM domain 4 [Source:MGI Symbol;Acc:MGI:1353470]	30794	0.80606	4.85809	4.18978	0.00019894	0.00583711
11	95337018	95381872	44855	+	ENSMUSG00000038893	Fam117a	protein_coding	family with sequence similarity 117, member A [Source:MGI Symbol;Acc:MGI:2144564]	215512	0.547364	5.53893	4.18124	0.000200123	0.00584884
11	106377656	106388075	10420	-	ENSMUSG00000001029	Icam2	protein_coding	intercellular adhesion molecule 2 [Source:MGI Symbol;Acc:MGI:96394]	15896	-0.956065	2.8774	-4.1939	0.000200394	0.00584884
11	102835849	102838040	2192	+	ENSMUSG00000020928	Higd1b	protein_coding	HIG1 domain family, member 1B [Source:MGI Symbol;Acc:MGI:1922939]	75689	-1.23654	0.41658	-4.1968	0.000207748	0.00599739
11	77686155	77741921	55767	+	ENSMUSG00000037857	Nufip2	protein_coding	nuclear fragile X mental retardation protein interacting protein 2 [Source:MGI Symbol;Acc:MGI:1915814]	68564	0.66054	4.9215	4.16716	0.000207927	0.00599739
11	58565856	58570553	4698	-	ENSMUSG00000059279	Olfr224	protein_coding	olfactory receptor 224 [Source:MGI Symbol;Acc:MGI:3030058]	258198	3.85465	-2.63027	4.30618	0.000215857	0.00614511
11	50210890	50235103	24214	+	ENSMUSG00000036620	Mgat4b	protein_coding	mannoside acetylglucosaminyltransferase 4, isoenzyme B [Source:MGI Symbol;Acc:MGI:2143974]	103534	0.415938	7.88406	4.14369	0.000218892	0.00619696
11	101325063	101329702	4640	+	ENSMUSG00000078651	Aoc2	protein_coding	amine oxidase, copper containing 2 (retina-specific) [Source:MGI Symbol;Acc:MGI:2668431]	237940	2.00846	0.323616	4.2166	0.000224367	0.00628194
11	87979525	87987533	8009	-	ENSMUSG00000020483	Dynll2	protein_coding	dynein light chain LC8-type 2 [Source:MGI Symbol;Acc:MGI:1915347]	68097	0.477721	6.54063	4.10556	0.000240168	0.0064647
11	46193850	46312859	119010	-	ENSMUSG00000020340	Cyfip2	protein_coding	cytoplasmic FMR1 interacting protein 2 [Source:MGI Symbol;Acc:MGI:1924134]	76884	1.29303	5.61918	4.111	0.000259219	0.00665491
11	6597823	6606053	8231	-	ENSMUSG00000041073	Nacad	protein_coding	NAC alpha domain containing [Source:MGI Symbol;Acc:MGI:3603030]	192950	1.75575	1.70913	4.123	0.000272344	0.00682686
11	102604396	102608058	3663	+	ENSMUSG00000050288	Fzd2	protein_coding	frizzled class receptor 2 [Source:MGI Symbol;Acc:MGI:1888513]	57265	-1.29118	2.73011	-4.03183	0.000315086	0.00750408
11	80810175	80822033	11859	+	ENSMUSG00000035413	Tmem98	protein_coding	transmembrane protein 98 [Source:MGI Symbol;Acc:MGI:1923457]	103743	-1.00646	2.30008	-3.94469	0.000371735	0.00827542
11	84048041	84069261	21221	-	ENSMUSG00000018648	Dusp14	protein_coding	dual specificity phosphatase 14 [Source:MGI Symbol;Acc:MGI:1927168]	56405	-0.69377	3.55262	-3.92712	0.000373247	0.00827795
11	62602877	62604807	1931	+	ENSMUSG00000086841	2410006H16Rik	processed_transcript	RIKEN cDNA 2410006H16 gene [Source:MGI Symbol;Acc:MGI:1916471]	NA	-0.548363	3.65089	-3.89583	0.000399565	0.00861934
11	88047373	88053755	6383	+	ENSMUSG00000018379	Srsf1	protein_coding	serine and arginine-rich splicing factor 1 [Source:MGI Symbol;Acc:MGI:98283]	110809	0.640137	2.05484	3.79748	0.000509	0.00994493
11	69088490	69092384	3895	+	ENSMUSG00000020894	Vamp2	protein_coding	vesicle-associated membrane protein 2 [Source:MGI Symbol;Acc:MGI:1313277]	22318	0.427259	6.03054	3.78555	0.000520365	0.0101065
11	28385685	28584324	198640	-	ENSMUSG00000032878	Ccdc85a	protein_coding	coiled-coil domain containing 85A [Source:MGI Symbol;Acc:MGI:2445069]	216613	-1.70767	-0.0523186	-3.82494	0.000566578	0.0106181
11	32283511	32284465	955	+	ENSMUSG00000069919	Hba-a1	protein_coding	hemoglobin alpha, adult chain 1 [Source:MGI Symbol;Acc:MGI:96015]	15122	-1.85978	11.92	-3.8104	0.000602347	0.0109437
11	48946150	48979398	33249	-	ENSMUSG00000069893	9930111J21Rik1	protein_coding	RIKEN cDNA 9930111J21 gene 1 [Source:MGI Symbol;Acc:MGI:3041173]	667214	-1.651	-1.07189	-3.79374	0.000606229	0.0109962
11	98767932	98775333	7402	-	ENSMUSG00000020889	Nr1d1	protein_coding	nuclear receptor subfamily 1, group D, member 1 [Source:MGI Symbol;Acc:MGI:2444210]	217166	-0.93305	3.54863	-3.73094	0.000619619	0.0110948
11	97923238	97986444	63207	-	ENSMUSG00000017417	Plxdc1	protein_coding	plexin domain containing 1 [Source:MGI Symbol;Acc:MGI:1919574]	72324	-1.59952	1.06273	-3.77377	0.000631246	0.011216
11	54902453	54910377	7925	+	ENSMUSG00000018339	Gpx3	protein_coding	glutathione peroxidase 3 [Source:MGI Symbol;Acc:MGI:105102]	14778	-1.34673	11.8327	-3.72799	0.000674373	0.0116973
11	77470485	77489678	19194	-	ENSMUSG00000037907	Ankrd13b	protein_coding	ankyrin repeat domain 13b [Source:MGI Symbol;Acc:MGI:2144501]	268445	-1.23454	0.945636	-3.70651	0.000695694	0.0118838
11	32533305	32624587	91283	+	ENSMUSG00000020272	Stk10	protein_coding	serine/threonine kinase 10 [Source:MGI Symbol;Acc:MGI:1099439]	20868	0.591573	4.6841	3.63267	0.000755105	0.0123824
11	32296489	32297298	810	+	ENSMUSG00000069917	Hba-a2	protein_coding	hemoglobin alpha, adult chain 2 [Source:MGI Symbol;Acc:MGI:96016]	110257	-1.73905	10.1021	-3.69926	0.000778106	0.0125447
11	101070012	101077672	7661	+	ENSMUSG00000001751	Naglu	protein_coding	alpha-N-acetylglucosaminidase (Sanfilippo disease IIIB) [Source:MGI Symbol;Acc:MGI:1351641]	27419	-0.848366	6.60198	-3.62618	0.000788787	0.0126371
11	17051586	17079371	27786	+	ENSMUSG00000044629	Cnrip1	protein_coding	cannabinoid receptor interacting protein 1 [Source:MGI Symbol;Acc:MGI:1917505]	380686	-1.65745	0.864874	-3.68269	0.000799338	0.0127395
11	102162497	102185296	22800	-	ENSMUSG00000020922	Lsm12	protein_coding	LSM12 homolog [Source:MGI Symbol;Acc:MGI:1919592]	268490	0.48673	5.05844	3.59909	0.000815155	0.0128856
11	69655314	69656727	1414	+	ENSMUSG00000041287	Sox15	protein_coding	SRY (sex determining region Y)-box 15 [Source:MGI Symbol;Acc:MGI:98363]	20670	1.21517	0.835085	3.63556	0.000825228	0.01295
11	101665541	101667832	2292	+	ENSMUSG00000034936	Arl4d	protein_coding	ADP-ribosylation factor-like 4D [Source:MGI Symbol;Acc:MGI:1933155]	80981	-1.01494	4.41729	-3.61844	0.000827427	0.0129626
11	98740638	98769006	28369	+	ENSMUSG00000058756	Thra	protein_coding	thyroid hormone receptor alpha [Source:MGI Symbol;Acc:MGI:98742]	21833	-0.952009	3.68877	-3.61301	0.000828766	0.0129626
11	101191115	101226463	35349	-	ENSMUSG00000006920	Ezh1	protein_coding	enhancer of zeste 1 polycomb repressive complex 2 subunit [Source:MGI Symbol;Acc:MGI:1097695]	14055	-0.363984	5.78177	-3.58424	0.000843685	0.013099
11	117199661	117362325	162665	+	ENSMUSG00000059248	Septin9	protein_coding	septin 9 [Source:MGI Symbol;Acc:MGI:1858222]	53860	0.420582	8.9441	3.57033	0.00087243	0.0132824
11	68209364	68400823	191460	-	ENSMUSG00000020902	Ntn1	protein_coding	netrin 1 [Source:MGI Symbol;Acc:MGI:105088]	18208	0.695772	5.22886	3.56552	0.000895085	0.01348
11	50602084	50807573	205490	+	ENSMUSG00000036545	Adamts2	protein_coding	a disintegrin-like and metallopeptidase (reprolysin type) with thrombospondin type 1 motif, 2 [Source:MGI Symbol;Acc:MGI:1347356]	216725	-1.45071	6.45068	-3.61912	0.00090037	0.0135035
11	98412470	98437716	25247	+	ENSMUSG00000062312	Erbb2	protein_coding	erb-b2 receptor tyrosine kinase 2 [Source:MGI Symbol;Acc:MGI:95410]	13866	-0.8354	2.91251	-3.55921	0.000925957	0.0137957
11	48861968	48871683	9716	-	ENSMUSG00000046879	Irgm1	protein_coding	immunity-related GTPase family M member 1 [Source:MGI Symbol;Acc:MGI:107567]	15944	-0.763008	2.89571	-3.54321	0.000952285	0.0140377
11	78188430	78192193	3764	+	ENSMUSG00000002059	Rab34	protein_coding	RAB34, member RAS oncogene family [Source:MGI Symbol;Acc:MGI:104606]	19376	-0.960934	2.0535	-3.54767	0.000973331	0.0142519
11	73160421	73172685	12265	+	ENSMUSG00000005950	P2rx5	protein_coding	purinergic receptor P2X, ligand-gated ion channel, 5 [Source:MGI Symbol;Acc:MGI:2137026]	94045	-1.33521	1.20742	-3.57742	0.000975432	0.014256
11	87033867	87074062	40196	-	ENSMUSG00000061666	Gdpd1	protein_coding	glycerophosphodiester phosphodiesterase domain containing 1 [Source:MGI Symbol;Acc:MGI:1913819]	66569	-1.03163	1.48977	-3.52636	0.00103934	0.0148633
11	104502745	104550620	47876	-	ENSMUSG00000020687	Cdc27	protein_coding	cell division cycle 27 [Source:MGI Symbol;Acc:MGI:102685]	217232	0.482928	5.90973	3.49114	0.0010551	0.0150186
11	3488284	3499350	11067	+	ENSMUSG00000034579	Pla2g3	protein_coding	phospholipase A2, group III [Source:MGI Symbol;Acc:MGI:2444945]	237625	2.07141	-1.56176	3.59601	0.00105922	0.0150401
11	5069689	5099266	29578	-	ENSMUSG00000009079	Ewsr1	protein_coding	Ewing sarcoma breakpoint region 1 [Source:MGI Symbol;Acc:MGI:99960]	14030	0.37749	5.79995	3.47999	0.00108215	0.0152477
11	75732869	75765845	32977	+	ENSMUSG00000020849	Ywhae	protein_coding	tyrosine 3-monooxygenase/tryptophan 5-monooxygenase activation protein, epsilon polypeptide [Source:MGI Symbol;Acc:MGI:894689]	22627	0.353294	8.35594	3.47533	0.00109416	0.015353
11	118332360	118342500	10141	-	ENSMUSG00000076433	Cep295nl	protein_coding	CEP295 N-terminal like [Source:MGI Symbol;Acc:MGI:1929713]	58251	-1.08409	-1.23039	-3.50651	0.00110259	0.0154222
11	69846376	69852058	5683	+	ENSMUSG00000019461	Plscr3	protein_coding	phospholipid scramblase 3 [Source:MGI Symbol;Acc:MGI:1917560]	70310	-0.713792	3.79185	-3.47664	0.00111069	0.0154789
11	67455091	67688990	233900	+	ENSMUSG00000033066	Gas7	protein_coding	growth arrest specific 7 [Source:MGI Symbol;Acc:MGI:1202388]	14457	-0.898903	4.99798	-3.4725	0.00115487	0.0158893
11	90030348	90036508	6161	+	ENSMUSG00000069763	Tmem100	protein_coding	transmembrane protein 100 [Source:MGI Symbol;Acc:MGI:1915138]	67888	-1.05575	5.1019	-3.48486	0.0011557	0.0158893
11	103727364	103749821	22458	-	ENSMUSG00000018486	Wnt9b	protein_coding	wingless-type MMTV integration site family, member 9B [Source:MGI Symbol;Acc:MGI:1197020]	22412	-1.14021	2.34484	-3.48912	0.00116393	0.0159255
11	105967945	105989964	22020	+	ENSMUSG00000020681	Ace	protein_coding	angiotensin I converting enzyme (peptidyl-dipeptidase A) 1 [Source:MGI Symbol;Acc:MGI:87874]	11421	-1.19256	5.66455	-3.45547	0.00127786	0.0168286
11	89035179	89066850	31672	-	ENSMUSG00000000276	Dgke	protein_coding	diacylglycerol kinase, epsilon [Source:MGI Symbol;Acc:MGI:1889276]	56077	0.47151	3.7496	3.40141	0.00130593	0.0170227
11	53864542	53891660	27119	-	ENSMUSG00000018900	Slc22a5	protein_coding	solute carrier family 22 (organic cation transporter), member 5 [Source:MGI Symbol;Acc:MGI:1329012]	20520	0.444897	6.65711	3.39516	0.00132473	0.0172238
11	97136171	97151495	15325	-	ENSMUSG00000038517	Tbkbp1	protein_coding	TBK1 binding protein 1 [Source:MGI Symbol;Acc:MGI:1920424]	73174	0.57628	4.1961	3.38338	0.00136958	0.0176421
11	86210681	86257575	46895	-	ENSMUSG00000018068	Ints2	protein_coding	integrator complex subunit 2 [Source:MGI Symbol;Acc:MGI:1917672]	70422	0.531139	3.9363	3.38091	0.00137397	0.017669
11	84984442	85140161	155720	-	ENSMUSG00000000804	Usp32	protein_coding	ubiquitin specific peptidase 32 [Source:MGI Symbol;Acc:MGI:2144475]	237898	0.436738	5.97358	3.34069	0.001507	0.0189131
11	98036623	98053462	16840	-	ENSMUSG00000017400	Stac2	protein_coding	SH3 and cysteine rich domain 2 [Source:MGI Symbol;Acc:MGI:2144518]	217154	-1.08808	4.39455	-3.37307	0.001528	0.0190888
11	70540064	70558110	18047	+	ENSMUSG00000020828	Pld2	protein_coding	phospholipase D2 [Source:MGI Symbol;Acc:MGI:892877]	18806	-0.397112	4.76326	-3.31726	0.00159209	0.0195435
11	116062095	116077961	15867	-	ENSMUSG00000057948	Unc13d	protein_coding	unc-13 homolog D [Source:MGI Symbol;Acc:MGI:1917700]	70450	1.24474	3.69184	3.3635	0.00161834	0.0197188
11	20062304	20112913	50610	-	ENSMUSG00000020152	Actr2	protein_coding	ARP2 actin-related protein 2 [Source:MGI Symbol;Acc:MGI:1913963]	66713	0.641457	7.26441	3.30929	0.00164291	0.0198445
11	69881567	69895539	13973	-	ENSMUSG00000001588	Acap1	protein_coding	ArfGAP with coiled-coil, ankyrin repeat and PH domains 1 [Source:MGI Symbol;Acc:MGI:2388270]	216859	-1.00103	0.0775185	-3.33332	0.00165149	0.0198698
11	64079484	64083259	3776	+	ENSMUSG00000087497	2810001G20Rik	antisense	RIKEN cDNA 2810001G20 gene [Source:MGI Symbol;Acc:MGI:1913706]	NA	-0.648317	0.777827	-3.27682	0.00177599	0.0208437
11	99477974	99493137	15164	-	ENSMUSG00000006777	Krt23	protein_coding	keratin 23 [Source:MGI Symbol;Acc:MGI:2148866]	94179	-1.05943	0.951316	-3.30561	0.00178897	0.0209639
11	115497353	115514387	17035	-	ENSMUSG00000020737	Jpt1	protein_coding	Jupiter microtubule associated homolog 1 [Source:MGI Symbol;Acc:MGI:1096361]	15374	-0.440621	4.78603	-3.23722	0.00192362	0.022036
11	51692264	51763634	71371	-	ENSMUSG00000036391	Sec24a	protein_coding	Sec24 related gene family, member A (S. cerevisiae) [Source:MGI Symbol;Acc:MGI:1924621]	77371	0.448217	5.07673	3.20371	0.00208145	0.0231216
11	109573331	109611967	38637	-	ENSMUSG00000041895	Wipi1	protein_coding	WD repeat domain, phosphoinositide interacting 1 [Source:MGI Symbol;Acc:MGI:1261864]	52639	-0.573224	5.9937	-3.20001	0.00211349	0.0233215
11	75768966	75796049	27084	-	ENSMUSG00000020848	Doc2b	protein_coding	double C2, beta [Source:MGI Symbol;Acc:MGI:1100497]	13447	-1.15962	2.45389	-3.2402	0.0021448	0.0234809
11	115347707	115367756	20050	-	ENSMUSG00000034586	Hid1	protein_coding	HID1 domain containing [Source:MGI Symbol;Acc:MGI:2445087]	217310	-0.766683	2.25789	-3.19232	0.0022099	0.0239128
11	108425192	108860615	435424	+	ENSMUSG00000020728	Cep112	protein_coding	centrosomal protein 112 [Source:MGI Symbol;Acc:MGI:1923673]	76380	-0.589223	0.711792	-3.169	0.00227681	0.0244028
11	69682577	69696098	13522	-	ENSMUSG00000018752	Tnfsfm13	protein_coding	tumor necrosis factor (ligand) superfamily, membrane-bound member 13 [Source:MGI Symbol;Acc:MGI:3845075]	619441	-1.42986	-1.79091	-3.21178	0.00243936	0.0255335
11	107207892	107470699	262808	-	ENSMUSG00000040430	Pitpnc1	protein_coding	phosphatidylinositol transfer protein, cytoplasmic 1 [Source:MGI Symbol;Acc:MGI:1919045]	71795	-0.856812	2.25982	-3.15552	0.00245608	0.0256249
11	32286965	32287784	820	+	ENSMUSG00000073063	Hbq1b	protein_coding	hemoglobin, theta 1B [Source:MGI Symbol;Acc:MGI:3613460]	544763	-1.52676	-0.97567	-3.21572	0.00246424	0.0256576
11	106654217	106750628	96412	-	ENSMUSG00000020717	Pecam1	protein_coding	platelet/endothelial cell adhesion molecule 1 [Source:MGI Symbol;Acc:MGI:97537]	18613	-0.686978	7.27545	-3.13959	0.00247067	0.0257071
11	119036305	119040969	4665	-	ENSMUSG00000025578	Cbx8	protein_coding	chromobox 8 [Source:MGI Symbol;Acc:MGI:1353589]	30951	0.499687	3.36856	3.12286	0.00251985	0.0260164
11	77982754	78030539	47786	+	ENSMUSG00000037791	Phf12	protein_coding	PHD finger protein 12 [Source:MGI Symbol;Acc:MGI:1924057]	268448	0.335443	5.77919	3.09394	0.00268623	0.027087
11	48985327	48994172	8846	-	ENSMUSG00000078922	Tgtp1	protein_coding	T cell specific GTPase 1 [Source:MGI Symbol;Acc:MGI:98734]	21822	-1.10254	-0.0334944	-3.13934	0.00270218	0.0271744
11	43474276	43491525	17250	+	ENSMUSG00000046491	C1qtnf2	protein_coding	C1q and tumor necrosis factor related protein 2 [Source:MGI Symbol;Acc:MGI:1916433]	69183	-1.0803	-0.188273	-3.13447	0.00271972	0.0272257
11	95026258	95041354	15097	-	ENSMUSG00000038967	Pdk2	protein_coding	pyruvate dehydrogenase kinase, isoenzyme 2 [Source:MGI Symbol;Acc:MGI:1343087]	18604	-0.518107	5.0732	-3.08564	0.00275146	0.0275018
11	69398508	69413675	15168	-	ENSMUSG00000018476	Kdm6b	protein_coding	KDM1 lysine (K)-specific demethylase 6B [Source:MGI Symbol;Acc:MGI:2448492]	216850	0.42277	6.66951	3.07581	0.002804	0.0278119
11	105292643	105351139	58497	+	ENSMUSG00000020695	Mrc2	protein_coding	mannose receptor, C type 2 [Source:MGI Symbol;Acc:MGI:107818]	17534	-0.944051	4.81746	-3.1019	0.00284753	0.0281736
11	119022962	119031270	8309	+	ENSMUSG00000025577	Cbx2	protein_coding	chromobox 2 [Source:MGI Symbol;Acc:MGI:88289]	12416	0.972317	4.15042	3.07157	0.00308265	0.0299201
11	110100749	110168196	67448	-	ENSMUSG00000041797	Abca9	protein_coding	ATP-binding cassette, sub-family A (ABC1), member 9 [Source:MGI Symbol;Acc:MGI:2386796]	217262	-1.11106	0.85769	-3.08253	0.00310533	0.030026
11	112782224	112787760	5537	+	ENSMUSG00000000567	Sox9	protein_coding	SRY (sex determining region Y)-box 9 [Source:MGI Symbol;Acc:MGI:98371]	20682	-0.707379	3.66908	-3.03019	0.00320784	0.0306535
11	69396519	69398234	1716	-	ENSMUSG00000045377	Tmem88	protein_coding	transmembrane protein 88 [Source:MGI Symbol;Acc:MGI:1914270]	67020	-0.839533	2.80741	-3.02604	0.00332966	0.0313201
11	117867952	117873481	5530	-	ENSMUSG00000017713	Tha1	protein_coding	threonine aldolase 1 [Source:MGI Symbol;Acc:MGI:1919026]	71776	-1.37473	-2.11039	-3.06327	0.00345903	0.0321277
11	6658521	6677475	18955	+	ENSMUSG00000041046	Ramp3	protein_coding	receptor (calcitonin) activity modifying protein 3 [Source:MGI Symbol;Acc:MGI:1860292]	56089	-0.781473	4.55228	-3.00086	0.00348843	0.0323131
11	82910550	82943403	32854	+	ENSMUSG00000018845	Unc45b	protein_coding	unc-45 myosin chaperone B [Source:MGI Symbol;Acc:MGI:2443377]	217012	-1.32088	-1.67058	-3.036	0.00365069	0.0333218
11	16752203	16918158	165956	+	ENSMUSG00000020122	Egfr	protein_coding	epidermal growth factor receptor [Source:MGI Symbol;Acc:MGI:95294]	13649	-0.801634	7.07659	-2.97807	0.00369747	0.0334893
11	6427229	6444443	17215	-	ENSMUSG00000041126	H2az2	protein_coding	H2A.Z histone variant 2 [Source:MGI Symbol;Acc:MGI:1924855]	77605	-0.466013	3.66831	-2.94999	0.00375592	0.0338785
11	3344256	3409189	64934	-	ENSMUSG00000020451	Limk2	protein_coding	LIM motif-containing protein kinase 2 [Source:MGI Symbol;Acc:MGI:1197517]	16886	0.37425	8.51967	2.93719	0.00385854	0.0343923
11	33211795	33513746	301952	-	ENSMUSG00000040594	Ranbp17	protein_coding	RAN binding protein 17 [Source:MGI Symbol;Acc:MGI:1929706]	66011	0.650553	2.14489	2.94121	0.00391032	0.0347339
11	60353329	60394341	41013	+	ENSMUSG00000056598	Drc3	protein_coding	dynein regulatory complex subunit 3 [Source:MGI Symbol;Acc:MGI:1921915]	74665	-1.07543	-1.54371	-2.98033	0.00393433	0.0347911
11	51813455	51857653	44199	-	ENSMUSG00000020387	Jade2	protein_coding	jade family PHD finger 2 [Source:MGI Symbol;Acc:MGI:1924151]	76901	-0.844062	1.22419	-2.95336	0.00395846	0.0349238
11	50293961	50325673	31713	-	ENSMUSG00000020368	Canx	protein_coding	calnexin [Source:MGI Symbol;Acc:MGI:88261]	12330	0.456761	9.01881	2.92299	0.0039945	0.0351002
11	116105752	116127210	21459	-	ENSMUSG00000020773	Trim47	protein_coding	tripartite motif-containing 47 [Source:MGI Symbol;Acc:MGI:1917374]	217333	-1.09353	2.83718	-2.96965	0.00405462	0.0355064
11	46735080	46779578	44499	+	ENSMUSG00000040405	Havcr1	protein_coding	hepatitis A virus cellular receptor 1 [Source:MGI Symbol;Acc:MGI:2159680]	171283	-0.767351	2.48311	-2.92046	0.00420103	0.0363862
11	23007531	23030788	23258	+	ENSMUSG00000049811	Fam161a	protein_coding	family with sequence similarity 161, member A [Source:MGI Symbol;Acc:MGI:1921123]	73873	-0.740888	0.540049	-2.91536	0.00422667	0.0365326
11	100956733	100970887	14155	-	ENSMUSG00000004044	Cavin1	protein_coding	caveolae associated 1 [Source:MGI Symbol;Acc:MGI:1277968]	19285	-0.627831	6.25295	-2.89212	0.0043653	0.0374639
11	69942539	69948188	5650	-	ENSMUSG00000018566	Slc2a4	protein_coding	solute carrier family 2 (facilitated glucose transporter), member 4 [Source:MGI Symbol;Acc:MGI:95758]	20528	-1.33419	-1.81488	-2.96155	0.00438199	0.0374639
11	71749920	71789647	39728	+	ENSMUSG00000020811	Wscd1	protein_coding	WSC domain containing 1 [Source:MGI Symbol;Acc:MGI:2448493]	216881	-0.776887	1.62123	-2.8941	0.00447837	0.0380829
11	46055992	46147343	91352	+	ENSMUSG00000011256	Adam19	protein_coding	a disintegrin and metallopeptidase domain 19 (meltrin beta) [Source:MGI Symbol;Acc:MGI:105377]	11492	0.495768	7.89058	2.86088	0.00461575	0.038822
11	58954685	58956830	2146	+	ENSMUSG00000078851	H2aw	protein_coding	H2A.W histone [Source:MGI Symbol;Acc:MGI:2448458]	319162	-0.626029	0.91805	-2.86442	0.00465239	0.0390016
11	70651850	70654644	2795	-	ENSMUSG00000018293	Pfn1	protein_coding	profilin 1 [Source:MGI Symbol;Acc:MGI:97549]	18643	0.41284	7.99377	2.85185	0.00469215	0.0392491
11	23564961	23633639	68679	-	ENSMUSG00000042208	0610010F05Rik	protein_coding	RIKEN cDNA 0610010F05 gene [Source:MGI Symbol;Acc:MGI:1918925]	71675	0.395857	4.63307	2.84886	0.00472226	0.0394793
11	103774150	103817957	43808	+	ENSMUSG00000000125	Wnt3	protein_coding	wingless-type MMTV integration site family, member 3 [Source:MGI Symbol;Acc:MGI:98955]	22415	-1.07099	-0.910744	-2.90231	0.00473462	0.0395611
11	97688823	97700497	11675	-	ENSMUSG00000018537	Pcgf2	protein_coding	polycomb group ring finger 2 [Source:MGI Symbol;Acc:MGI:99161]	22658	-0.507294	4.51189	-2.84721	0.00476668	0.0396222
11	35121224	35708507	587284	+	ENSMUSG00000056427	Slit3	protein_coding	slit guidance ligand 3 [Source:MGI Symbol;Acc:MGI:1315202]	20564	-0.972727	5.24301	-2.88596	0.00479717	0.0397154
11	108920349	108950783	30435	+	ENSMUSG00000000142	Axin2	protein_coding	axin 2 [Source:MGI Symbol;Acc:MGI:1270862]	12006	-0.843185	2.97047	-2.86782	0.00484082	0.0399906
11	31872211	31935634	63424	+	ENSMUSG00000020300	Cpeb4	protein_coding	cytoplasmic polyadenylation element binding protein 4 [Source:MGI Symbol;Acc:MGI:1914829]	67579	0.506654	5.43079	2.84023	0.004843	0.0399906
11	95509845	95514570	4726	-	ENSMUSG00000046719	Nxph3	protein_coding	neurexophilin 3 [Source:MGI Symbol;Acc:MGI:1336188]	104079	-0.843283	1.37748	-2.8466	0.00508807	0.041214
11	94629767	94645216	15450	+	ENSMUSG00000020869	Lrrc59	protein_coding	leucine rich repeat containing 59 [Source:MGI Symbol;Acc:MGI:2138133]	98238	0.301842	7.71101	2.81182	0.00513241	0.0414162
11	102041509	102055620	14112	+	ENSMUSG00000017309	Cd300lg	protein_coding	CD300 molecule like family member G [Source:MGI Symbol;Acc:MGI:1289168]	52685	-1.12978	1.88678	-2.85994	0.00531775	0.0425087
11	119143045	119228499	85455	-	ENSMUSG00000039976	Tbc1d16	protein_coding	TBC1 domain family, member 16 [Source:MGI Symbol;Acc:MGI:2652878]	207592	0.484738	5.0227	2.78952	0.00542531	0.043121
11	116803062	116828046	24985	-	ENSMUSG00000020814	Mxra7	protein_coding	matrix-remodelling associated 7 [Source:MGI Symbol;Acc:MGI:1914872]	67622	-0.596954	3.4594	-2.74342	0.00610989	0.0467194
11	86936425	86993707	57283	-	ENSMUSG00000018427	Ypel2	protein_coding	yippee like 2 [Source:MGI Symbol;Acc:MGI:1925114]	77864	0.62714	4.91617	2.74111	0.0061763	0.0469745
11	29130744	29161828	31085	+	ENSMUSG00000020464	Pnpt1	protein_coding	polyribonucleotide nucleotidyltransferase 1 [Source:MGI Symbol;Acc:MGI:1918951]	71701	0.373767	3.81848	2.72416	0.00625571	0.0473744
11	6546887	6596744	49858	+	ENSMUSG00000000378	Ccm2	protein_coding	cerebral cavernous malformation 2 [Source:MGI Symbol;Acc:MGI:2384924]	216527	0.346767	5.53608	2.71925	0.00632289	0.0476582
11	115607918	115612969	5052	-	ENSMUSG00000020743	Mif4gd	protein_coding	MIF4G domain containing [Source:MGI Symbol;Acc:MGI:1916924]	69674	-0.462887	3.00454	-2.70679	0.00652827	0.048644
11	87226906	87359023	132118	-	ENSMUSG00000046442	Ppm1e	protein_coding	protein phosphatase 1E (PP2C domain containing) [Source:MGI Symbol;Acc:MGI:2444096]	320472	-1.12317	2.50865	-2.77198	0.00654118	0.0487043
11	82802449	82871210	68762	-	ENSMUSG00000020696	Rffl	protein_coding	ring finger and FYVE like domain containing protein [Source:MGI Symbol;Acc:MGI:1914588]	67338	0.38317	5.76936	2.69979	0.00660773	0.0489855
11	73267388	73300363	32976	+	ENSMUSG00000043029	Trpv3	protein_coding	transient receptor potential cation channel, subfamily V, member 3 [Source:MGI Symbol;Acc:MGI:2181407]	246788	1.66475	-2.07552	2.81425	0.00668195	0.0493208
10	61098642	61147703	49062	-	ENSMUSG00000020097	Sgpl1	protein_coding	sphingosine phosphate lyase 1 [Source:MGI Symbol;Acc:MGI:1261415]	20397	-0.795771	6.4061	-6.58082	7.0189e-07	0.000467397
10	86779005	86838389	59385	+	ENSMUSG00000054027	Nt5dc3	protein_coding	5'-nucleotidase domain containing 3 [Source:MGI Symbol;Acc:MGI:3513266]	103466	1.11473	4.60179	6.22877	1.58357e-06	0.000551225
10	57794335	57811830	17496	+	ENSMUSG00000019872	Smpdl3a	protein_coding	sphingomyelin phosphodiesterase, acid-like 3A [Source:MGI Symbol;Acc:MGI:1931437]	57319	-0.878041	3.87094	-5.84475	3.7816e-06	0.000766029
10	75561604	75586200	24597	+	ENSMUSG00000006345	Ggt1	protein_coding	gamma-glutamyltransferase 1 [Source:MGI Symbol;Acc:MGI:95706]	14598	-1.32341	6.85925	-5.84573	3.91976e-06	0.000766029
10	120361275	120476469	115195	-	ENSMUSG00000056758	Hmga2	protein_coding	high mobility group AT-hook 2 [Source:MGI Symbol;Acc:MGI:101761]	15364	-1.90669	1.00461	-5.74691	5.32132e-06	0.000856545
10	59446984	59616692	169709	-	ENSMUSG00000009647	Mcu	protein_coding	mitochondrial calcium uniporter [Source:MGI Symbol;Acc:MGI:3026965]	215999	0.590965	5.30728	5.54102	7.63614e-06	0.00098612
10	9622936	9675208	52273	-	ENSMUSG00000060487	Samd5	protein_coding	sterile alpha motif domain containing 5 [Source:MGI Symbol;Acc:MGI:2444815]	320825	-1.59821	2.08478	-5.07474	2.55398e-05	0.00185387
10	23102963	23350786	247824	-	ENSMUSG00000010461	Eya4	protein_coding	EYA transcriptional coactivator and phosphatase 4 [Source:MGI Symbol;Acc:MGI:1337104]	14051	-1.52746	1.56819	-4.95245	3.40306e-05	0.00215377
10	80016653	80031472	14820	+	ENSMUSG00000035697	Arhgap45	protein_coding	Rho GTPase activating protein 45 [Source:MGI Symbol;Acc:MGI:1917969]	70719	-0.984441	1.58447	-4.87907	3.78561e-05	0.00225605
10	77986947	78010083	23137	-	ENSMUSG00000020277	Pfkl	protein_coding	phosphofructokinase, liver, B-type [Source:MGI Symbol;Acc:MGI:97547]	18641	-0.560318	6.03143	-4.83052	4.15622e-05	0.00239908
10	76032650	76043234	10585	+	ENSMUSG00000049764	Zfp280b	protein_coding	zinc finger protein 280B [Source:MGI Symbol;Acc:MGI:1927865]	64453	0.568397	4.94501	4.74633	5.09267e-05	0.00265984
10	79793572	79820896	27325	+	ENSMUSG00000035863	Palm	protein_coding	paralemmin [Source:MGI Symbol;Acc:MGI:1261814]	18483	0.942334	5.6393	4.68682	6.00866e-05	0.00289694
10	121263820	121351278	87459	-	ENSMUSG00000052302	Tbc1d30	protein_coding	TBC1 domain family, member 30 [Source:MGI Symbol;Acc:MGI:1921944]	74694	0.78881	3.78817	4.6346	6.73172e-05	0.00310447
10	93640681	93747207	106527	+	ENSMUSG00000020019	Ntn4	protein_coding	netrin 4 [Source:MGI Symbol;Acc:MGI:1888978]	57764	-0.799392	4.9547	-4.55247	8.22309e-05	0.00355091
10	75923222	75936496	13275	-	ENSMUSG00000000901	Mmp11	protein_coding	matrix metallopeptidase 11 [Source:MGI Symbol;Acc:MGI:97008]	17385	-0.879076	5.41897	-4.51652	9.03572e-05	0.00381243
10	22158569	22374139	215571	+	ENSMUSG00000053219	Raet1e	protein_coding	retinoic acid early transcript 1E [Source:MGI Symbol;Acc:MGI:2675273]	379043	1.53759	-0.115744	4.50645	0.000101718	0.00406765
10	21882184	21999903	117720	+	ENSMUSG00000019970	Sgk1	protein_coding	serum/glucocorticoid regulated kinase 1 [Source:MGI Symbol;Acc:MGI:1340062]	20393	-0.660819	6.88143	-4.44374	0.000106215	0.00416107
10	99263231	99267489	4259	+	ENSMUSG00000019960	Dusp6	protein_coding	dual specificity phosphatase 6 [Source:MGI Symbol;Acc:MGI:1914853]	67603	-0.733027	3.65132	-4.4282	0.000110714	0.00418703
10	75589340	75617200	27861	+	ENSMUSG00000006344	Ggt5	protein_coding	gamma-glutamyltransferase 5 [Source:MGI Symbol;Acc:MGI:1346063]	23887	-1.54445	0.669366	-4.32577	0.000159108	0.00514658
10	79927043	79955018	27976	+	ENSMUSG00000019564	Arid3a	protein_coding	AT rich interactive domain 3A (BRIGHT-like) [Source:MGI Symbol;Acc:MGI:1328360]	13496	0.688659	6.44378	4.27481	0.000160313	0.00516732
10	59799199	59800254	1056	-	ENSMUSG00000091184	Gm17059	antisense	predicted gene 17059 [Source:MGI Symbol;Acc:MGI:4937886]	NA	0.890354	1.64819	4.27603	0.000162617	0.00516732
10	17723218	17725674	2457	+	ENSMUSG00000039910	Cited2	protein_coding	Cbp/p300-interacting transactivator, with Glu/Asp-rich carboxy-terminal domain, 2 [Source:MGI Symbol;Acc:MGI:1306784]	17684	0.643659	10.0372	4.17822	0.000202246	0.00587781
10	75831114	75837424	6311	-	ENSMUSG00000033318	Gstt2	protein_coding	glutathione S-transferase, theta 2 [Source:MGI Symbol;Acc:MGI:106188]	14872	-0.979903	2.06427	-4.1512	0.000223207	0.00628194
10	70440481	70558736	118256	+	ENSMUSG00000043259	Fam13c	protein_coding	family with sequence similarity 13, member C [Source:MGI Symbol;Acc:MGI:1918971]	71721	-1.38821	0.379138	-4.17688	0.000223946	0.00628194
10	75937723	75940672	2950	-	ENSMUSG00000050157	Gm867	protein_coding	predicted gene 867 [Source:MGI Symbol;Acc:MGI:2685713]	333670	-1.5527	0.97385	-4.1834	0.000226667	0.00628194
10	120141648	120202130	60483	-	ENSMUSG00000020227	Irak3	protein_coding	interleukin-1 receptor-associated kinase 3 [Source:MGI Symbol;Acc:MGI:1921164]	73914	-1.09079	2.23622	-4.11942	0.00024538	0.00651626
10	22360552	22374139	13588	+	ENSMUSG00000078452	Raet1d	protein_coding	retinoic acid early transcript delta [Source:MGI Symbol;Acc:MGI:1861032]	c(19368, 19369, 19370, 56554)	1.52278	0.329517	4.09013	0.000284152	0.00700817
10	10545002	10558265	13264	-	ENSMUSG00000019832	Rab32	protein_coding	RAB32, member RAS oncogene family [Source:MGI Symbol;Acc:MGI:1915094]	67844	-0.622803	3.32358	-3.98509	0.000322844	0.0076072
10	13499540	13519035	19496	+	ENSMUSG00000019810	Fuca2	protein_coding	fucosidase, alpha-L- 2, plasma [Source:MGI Symbol;Acc:MGI:1914098]	66848	-0.495802	6.91412	-3.95201	0.000348399	0.00798815
10	116275523	116389535	114013	+	ENSMUSG00000020154	Ptprb	protein_coding	protein tyrosine phosphatase, receptor type, B [Source:MGI Symbol;Acc:MGI:97809]	19263	-0.885045	5.48115	-3.90442	0.000402793	0.00865243
10	83722865	83762762	39898	+	ENSMUSG00000087651	1500009L16Rik	protein_coding	RIKEN cDNA 1500009L16 gene [Source:MGI Symbol;Acc:MGI:1917034]	69784	1.61987	2.0172	3.94551	0.000413703	0.00878817
10	121641588	121693915	52328	+	ENSMUSG00000047642	D930020B18Rik	protein_coding	RIKEN cDNA D930020B18 gene [Source:MGI Symbol;Acc:MGI:2442001]	216393	0.973194	1.33059	3.89401	0.000418645	0.00884408
10	56106917	56116880	9964	+	ENSMUSG00000047669	Msl3l2	protein_coding	MSL3 like 2 [Source:MGI Symbol;Acc:MGI:1920640]	73390	-0.664163	1.58281	-3.87054	0.000427204	0.00896763
10	84370905	84440597	69693	-	ENSMUSG00000020032	Nuak1	protein_coding	NUAK family, SNF1-like kinase, 1 [Source:MGI Symbol;Acc:MGI:1925226]	77976	1.12458	5.11078	3.88916	0.000434701	0.00902199
10	123196695	123199418	2724	+	ENSMUSG00000112294	Gm4129	bidirectional_promoter_lncRNA	predicted gene 4129 [Source:MGI Symbol;Acc:MGI:3782305]	NA	0.985013	0.596251	3.87294	0.000441647	0.00915327
10	80339110	80348412	9303	-	ENSMUSG00000043822	Adamtsl5	protein_coding	ADAMTS-like 5 [Source:MGI Symbol;Acc:MGI:1913798]	66548	-1.1569	4.35279	-3.76344	0.000595753	0.0108687
10	24149302	24190222	40921	+	ENSMUSG00000019998	Stx7	protein_coding	syntaxin 7 [Source:MGI Symbol;Acc:MGI:1858210]	53331	-0.483356	5.57562	-3.72208	0.00060667	0.0109962
10	57631981	57741112	109132	+	ENSMUSG00000019876	Pkib	protein_coding	protein kinase inhibitor beta, cAMP dependent, testis specific [Source:MGI Symbol;Acc:MGI:101937]	18768	2.06669	0.0980142	3.76305	0.000699251	0.0119129
10	110919789	110939622	19834	+	ENSMUSG00000020186	Csrp2	protein_coding	cysteine and glycine-rich protein 2 [Source:MGI Symbol;Acc:MGI:1202907]	13008	-0.597189	4.42475	-3.65272	0.00071979	0.0120664
10	59422958	59441778	18821	-	ENSMUSG00000009654	Oit3	protein_coding	oncoprotein induced transcript 3 [Source:MGI Symbol;Acc:MGI:1201782]	18302	-0.995388	4.03533	-3.66001	0.000744808	0.0123191
10	4611593	5005614	394022	+	ENSMUSG00000019768	Esr1	protein_coding	estrogen receptor 1 (alpha) [Source:MGI Symbol;Acc:MGI:1352467]	13982	-1.35085	3.76915	-3.65104	0.000816079	0.0128856
10	105187663	105574451	386789	-	ENSMUSG00000036019	Tmtc2	protein_coding	transmembrane and tetratricopeptide repeat containing 2 [Source:MGI Symbol;Acc:MGI:1914057]	278279	-0.807542	0.973347	-3.58631	0.000863495	0.0132253
10	83360221	83488505	128285	+	ENSMUSG00000020255	D10Wsu102e	protein_coding	DNA segment, Chr 10, Wayne State University 102, expressed [Source:MGI Symbol;Acc:MGI:106381]	28109	0.480937	5.15194	3.57182	0.000870056	0.0132727
10	93453411	93484875	31465	+	ENSMUSG00000015889	Lta4h	protein_coding	leukotriene A4 hydrolase [Source:MGI Symbol;Acc:MGI:96836]	16993	-0.346063	5.34008	-3.56008	0.000893838	0.0134744
10	120201590	120224917	23328	+	ENSMUSG00000020225	Tmbim4	protein_coding	transmembrane BAX inhibitor motif containing 4 [Source:MGI Symbol;Acc:MGI:1915462]	68212	-0.397115	5.48848	-3.46193	0.00112981	0.0156457
10	43578284	43584265	5982	+	ENSMUSG00000047139	Cd24a	protein_coding	CD24a antigen [Source:MGI Symbol;Acc:MGI:88323]	12484	-0.740488	6.1296	-3.45942	0.00116162	0.0159135
10	81335265	81343266	8002	-	ENSMUSG00000034872	Gipc3	protein_coding	GIPC PDZ domain containing family, member 3 [Source:MGI Symbol;Acc:MGI:2387006]	209047	-1.22702	-0.460663	-3.48284	0.00120369	0.0162643
10	45178098	45318452	140355	+	ENSMUSG00000019848	Popdc3	protein_coding	popeye domain containing 3 [Source:MGI Symbol;Acc:MGI:1930153]	78977	-1.25581	3.19916	-3.48291	0.00121074	0.0162806
10	127321964	127329943	7980	+	ENSMUSG00000040345	Arhgap9	protein_coding	Rho GTPase activating protein 9 [Source:MGI Symbol;Acc:MGI:2143764]	216445	0.493957	3.44931	3.42357	0.00123969	0.0165248
10	123105006	123196995	91990	-	ENSMUSG00000020124	Usp15	protein_coding	ubiquitin specific peptidase 15 [Source:MGI Symbol;Acc:MGI:101857]	14479	0.445152	6.27097	3.41102	0.00127578	0.0168271
10	18581839	18743949	162111	-	ENSMUSG00000019852	Arfgef3	protein_coding	ARFGEF family member 3 [Source:MGI Symbol;Acc:MGI:106387]	215821	0.780114	4.53538	3.4182	0.00129009	0.0169025
10	24595442	24598683	3242	+	ENSMUSG00000019997	Ccn2	protein_coding	cellular communication network factor 2 [Source:MGI Symbol;Acc:MGI:95537]	14219	-1.08443	7.27465	-3.40121	0.00142567	0.0180908
10	78069302	78083913	14612	+	ENSMUSG00000000732	Icosl	protein_coding	icos ligand [Source:MGI Symbol;Acc:MGI:1354701]	50723	-0.769338	1.7035	-3.37433	0.00143105	0.0181155
10	75646112	75764341	118230	-	ENSMUSG00000020196	Cabin1	protein_coding	calcineurin binding protein 1 [Source:MGI Symbol;Acc:MGI:1298375]	104248	0.506159	5.8232	3.35439	0.00146164	0.018425
10	117688875	117710758	21884	-	ENSMUSG00000020184	Mdm2	protein_coding	transformed mouse 3T3 cell double minute 2 [Source:MGI Symbol;Acc:MGI:96952]	17246	0.458065	5.6822	3.34911	0.00147787	0.0186144
10	62659043	62726128	67086	-	ENSMUSG00000036923	Stox1	protein_coding	storkhead box 1 [Source:MGI Symbol;Acc:MGI:2684909]	216021	-0.876642	2.39119	-3.35345	0.00153348	0.019126
10	116018213	116274932	256720	+	ENSMUSG00000020151	Ptprr	protein_coding	protein tyrosine phosphatase, receptor type, R [Source:MGI Symbol;Acc:MGI:109559]	19279	-1.18089	1.56169	-3.36768	0.00157983	0.019482
10	79637856	79639520	1665	+	ENSMUSG00000111977	Gm47163	bidirectional_promoter_lncRNA	predicted gene, 47163 [Source:MGI Symbol;Acc:MGI:6095939]	NA	-1.43311	0.326088	-3.38786	0.00158612	0.0195124
10	121739937	121752878	12942	+	ENSMUSG00000053684	BC048403	protein_coding	cDNA sequence BC048403 [Source:MGI Symbol;Acc:MGI:2670984]	270802	0.434661	3.03387	3.30342	0.0016457	0.019862
10	70922832	71159700	236869	-	ENSMUSG00000014329	Bicc1	protein_coding	BicC family RNA binding protein 1 [Source:MGI Symbol;Acc:MGI:1933388]	83675	-0.582619	3.28195	-3.30085	0.00166679	0.0199737
10	79618051	79637918	19868	-	ENSMUSG00000020312	Shc2	protein_coding	SHC (Src homology 2 domain containing) transforming protein 2 [Source:MGI Symbol;Acc:MGI:106180]	216148	-0.949745	3.6314	-3.31591	0.00170385	0.0202768
10	75636706	75644008	7303	-	ENSMUSG00000006342	Susd2	protein_coding	sushi domain containing 2 [Source:MGI Symbol;Acc:MGI:1918983]	71733	-1.05819	4.78323	-3.31379	0.00175334	0.0207047
10	117629500	117687352	57853	+	ENSMUSG00000020183	Cpm	protein_coding	carboxypeptidase M [Source:MGI Symbol;Acc:MGI:1917824]	70574	-0.71506	5.04621	-3.2464	0.00192638	0.0220445
10	93488768	93519304	30537	+	ENSMUSG00000020017	Hal	protein_coding	histidine ammonia lyase [Source:MGI Symbol;Acc:MGI:96010]	15109	-1.3593	0.99924	-3.28039	0.00203249	0.0228223
10	58813359	59138916	325558	+	ENSMUSG00000037990	Sh3rf3	protein_coding	SH3 domain containing ring finger 3 [Source:MGI Symbol;Acc:MGI:2444637]	237353	-0.86532	0.338254	-3.23076	0.00205504	0.0229782
10	4482502	4562231	79730	+	ENSMUSG00000019767	Ccdc170	protein_coding	coiled-coil domain containing 170 [Source:MGI Symbol;Acc:MGI:2685067]	100504234	0.839548	1.44666	3.21815	0.00210699	0.0232665
10	115339674	115362501	22828	-	ENSMUSG00000069520	Tmem19	protein_coding	transmembrane protein 19 [Source:MGI Symbol;Acc:MGI:1914476]	67226	-0.34371	5.40264	-3.16889	0.00225568	0.0242783
10	76207222	76237865	30644	-	ENSMUSG00000020230	Prmt2	protein_coding	protein arginine N-methyltransferase 2 [Source:MGI Symbol;Acc:MGI:1316652]	15468	0.333036	5.57275	3.16199	0.00229233	0.0245177
10	31493193	31609184	115992	-	ENSMUSG00000063760	Rnf217	protein_coding	ring finger protein 217 [Source:MGI Symbol;Acc:MGI:3610311]	268291	-0.576305	3.35812	-3.1616	0.00231392	0.0246625
10	91147571	91181315	33745	-	ENSMUSG00000019961	Tmpo	protein_coding	thymopoietin [Source:MGI Symbol;Acc:MGI:106920]	21917	-0.441414	4.49638	-3.14311	0.00239823	0.0252276
10	42583822	42702459	118638	+	ENSMUSG00000038280	Ostm1	protein_coding	osteopetrosis associated transmembrane protein 1 [Source:MGI Symbol;Acc:MGI:2655574]	14628	0.535813	5.28429	3.11761	0.00255673	0.026222
10	81559488	81566362	6875	+	ENSMUSG00000054452	Tle5	protein_coding	TLE family member 5, transcriptional modulator [Source:MGI Symbol;Acc:MGI:95806]	14797	-0.806447	5.96343	-3.12943	0.00258628	0.0264252
10	12938209	12964298	26090	-	ENSMUSG00000039232	Stx11	protein_coding	syntaxin 11 [Source:MGI Symbol;Acc:MGI:1921982]	74732	-0.513167	3.83465	-3.10683	0.00261796	0.0266554
10	62493833	62527451	33619	-	ENSMUSG00000020077	Srgn	protein_coding	serglycin [Source:MGI Symbol;Acc:MGI:97756]	19073	-1.37183	9.13706	-3.1493	0.00280552	0.0278119
10	116986314	117025040	38727	+	ENSMUSG00000020169	Best3	protein_coding	bestrophin 3 [Source:MGI Symbol;Acc:MGI:3580298]	382427	0.69167	0.363498	3.06401	0.00295458	0.029001
10	74967177	75016907	49731	+	ENSMUSG00000040009	Gnaz	protein_coding	guanine nucleotide binding protein, alpha z subunit [Source:MGI Symbol;Acc:MGI:95780]	14687	1.10146	1.51602	3.08293	0.00309513	0.0299842
10	99108159	99113247	5089	+	ENSMUSG00000090035	Galnt4	protein_coding	polypeptide N-acetylgalactosaminyltransferase 4 [Source:MGI Symbol;Acc:MGI:894692]	14426	-0.47896	3.07526	-3.02871	0.00313363	0.0301781
10	127095650	127121131	25482	-	ENSMUSG00000040462	Os9	protein_coding	amplified in osteosarcoma [Source:MGI Symbol;Acc:MGI:1924301]	216440	-0.465293	8.12881	-3.02606	0.003151	0.0302765
10	127197067	127211585	14519	-	ENSMUSG00000025417	Pip4k2c	protein_coding	phosphatidylinositol-5-phosphate 4-kinase, type II, gamma [Source:MGI Symbol;Acc:MGI:2152214]	117150	0.301868	7.04667	3.00494	0.0033009	0.0312641
10	120083608	120112987	29380	-	ENSMUSG00000020228	Helb	protein_coding	helicase (DNA) B [Source:MGI Symbol;Acc:MGI:2152895]	117599	-0.538195	1.9227	-3.00721	0.00330693	0.0312641
10	80567124	80577321	10198	-	ENSMUSG00000035397	Klf16	protein_coding	Kruppel-like factor 16 [Source:MGI Symbol;Acc:MGI:2153049]	118445	0.510522	4.50369	3.00141	0.0033444	0.0313865
10	86300372	86349506	49135	+	ENSMUSG00000020044	Timp3	protein_coding	tissue inhibitor of metalloproteinase 3 [Source:MGI Symbol;Acc:MGI:98754]	21859	-0.668886	6.72649	-2.99822	0.00343421	0.0319582
10	72654845	72674964	20120	+	ENSMUSG00000019923	Zwint	protein_coding	ZW10 interactor [Source:MGI Symbol;Acc:MGI:1289227]	52696	0.325819	7.59492	2.97952	0.00350009	0.0323131
10	41485642	41490369	4728	-	ENSMUSG00000019822	Smpd2	protein_coding	sphingomyelin phosphodiesterase 2, neutral [Source:MGI Symbol;Acc:MGI:1278330]	20598	-0.528789	3.72653	-2.98207	0.00350234	0.0323144
10	42181841	42276755	94915	-	ENSMUSG00000048756	Foxo3	protein_coding	forkhead box O3 [Source:MGI Symbol;Acc:MGI:1890081]	56484	-0.425011	6.33367	-2.94454	0.00379742	0.0340523
10	17790522	17799921	9400	-	ENSMUSG00000093672	Gm20655	antisense	predicted gene 20655 [Source:MGI Symbol;Acc:MGI:5313102]	NA	-1.19503	-1.77794	-2.97711	0.00408436	0.0356648
10	53904785	54076609	171825	-	ENSMUSG00000003746	Man1a	protein_coding	mannosidase 1, alpha [Source:MGI Symbol;Acc:MGI:104677]	17155	0.484756	8.09836	2.89611	0.00425497	0.036715
10	80148272	80158368	10097	+	ENSMUSG00000035621	Midn	protein_coding	midnolin [Source:MGI Symbol;Acc:MGI:1890222]	59090	0.381867	7.29182	2.88183	0.00437968	0.0374639
10	118855603	118870209	14607	-	ENSMUSG00000028630	Dyrk2	protein_coding	dual-specificity tyrosine-(Y)-phosphorylation regulated kinase 2 [Source:MGI Symbol;Acc:MGI:1330301]	69181	0.455201	5.40048	2.85916	0.00462211	0.0388329
10	23785183	23787275	2093	-	ENSMUSG00000061983	Rps12	protein_coding	ribosomal protein S12 [Source:MGI Symbol;Acc:MGI:98105]	20042	-0.415321	7.05332	-2.85585	0.00464991	0.0390016
10	128669894	128674073	4180	-	ENSMUSG00000049858	Suox	protein_coding	sulfite oxidase [Source:MGI Symbol;Acc:MGI:2446117]	211389	-0.454303	4.75418	-2.84779	0.00474317	0.0395949
10	97479609	97518143	38535	+	ENSMUSG00000019929	Dcn	protein_coding	decorin [Source:MGI Symbol;Acc:MGI:94872]	13179	-1.45073	9.05205	-2.93467	0.00479691	0.0397154
10	127525473	127534559	9087	-	ENSMUSG00000040258	Nxph4	protein_coding	neurexophilin 4 [Source:MGI Symbol;Acc:MGI:1336197]	104080	0.783139	3.04333	2.85704	0.00489101	0.0402097
10	81396186	81455635	59450	-	ENSMUSG00000055053	Nfic	protein_coding	nuclear factor I/C [Source:MGI Symbol;Acc:MGI:109591]	18029	-0.662545	5.4037	-2.81418	0.00525924	0.0421951
10	80056992	80105571	48580	-	ENSMUSG00000035673	Sbno2	protein_coding	strawberry notch 2 [Source:MGI Symbol;Acc:MGI:2448490]	216161	-0.495374	5.7644	-2.80222	0.0052757	0.0422608
10	121780991	122047315	266325	-	ENSMUSG00000020121	Srgap1	protein_coding	SLIT-ROBO Rho GTPase activating protein 1 [Source:MGI Symbol;Acc:MGI:2152936]	117600	0.492187	6.54571	2.78673	0.0054631	0.0433313
10	5825663	5922400	96738	-	ENSMUSG00000019775	Rgs17	protein_coding	regulator of G-protein signaling 17 [Source:MGI Symbol;Acc:MGI:1927469]	56533	0.507613	5.70223	2.7835	0.00551095	0.0435886
10	26980036	27619758	639723	-	ENSMUSG00000019899	Lama2	protein_coding	laminin, alpha 2 [Source:MGI Symbol;Acc:MGI:99912]	16773	-1.04189	1.91194	-2.83484	0.00551546	0.0435886
10	79064374	79097600	33227	-	ENSMUSG00000060301	2610008E11Rik	protein_coding	RIKEN cDNA 2610008E11 gene [Source:MGI Symbol;Acc:MGI:1919378]	72128	-0.794078	2.49616	-2.80393	0.00555133	0.0437817
10	89408823	89443967	35145	-	ENSMUSG00000074802	Gas2l3	protein_coding	growth arrest-specific 2 like 3 [Source:MGI Symbol;Acc:MGI:1918780]	237436	0.581266	1.96099	2.77498	0.00567117	0.0445662
10	85102627	85120618	17992	+	ENSMUSG00000060935	Tmem263	protein_coding	transmembrane protein 263 [Source:MGI Symbol;Acc:MGI:2143652]	103266	0.576066	5.80981	2.75315	0.00595554	0.0458559
10	85386814	85660292	273479	+	ENSMUSG00000020042	Btbd11	protein_coding	BTB (POZ) domain containing 11 [Source:MGI Symbol;Acc:MGI:1921257]	74007	0.921492	2.39418	2.77243	0.00618345	0.0470004
10	21410263	21410573	311	-	ENSMUSG00000112405	Fkbp1a-ps2	processed_pseudogene	FK506 binding protein 1a, pseudogene 2 [Source:MGI Symbol;Acc:MGI:107772]	NA	-1.59642	-0.937056	-2.83629	0.00625748	0.0473744
10	84576626	84614359	37734	+	ENSMUSG00000020034	Tcp11l2	protein_coding	t-complex 11 (mouse) like 2 [Source:MGI Symbol;Acc:MGI:2444679]	216198	-0.516893	4.28572	-2.71225	0.00648142	0.0484478
10	127290774	127296288	5515	+	ENSMUSG00000025408	Ddit3	protein_coding	DNA-damage inducible transcript 3 [Source:MGI Symbol;Acc:MGI:109247]	13198	0.504755	4.2729	2.70983	0.00650809	0.0485287
10	62804570	62908996	104427	-	ENSMUSG00000047146	Tet1	protein_coding	tet methylcytosine dioxygenase 1 [Source:MGI Symbol;Acc:MGI:1098693]	52463	1.21768	-0.478704	2.77631	0.0066349	0.0490732
9	7464141	7476869	12729	+	ENSMUSG00000043089	Mmp1a	polymorphic_pseudogene	matrix metallopeptidase 1a (interstitial collagenase) [Source:MGI Symbol;Acc:MGI:1933846]	83995	2.3564	1.90876	7.92199	4.47454e-08	0.000174528
9	111054486	111057519	3034	-	ENSMUSG00000043953	Ccrl2	protein_coding	chemokine (C-C motif) receptor-like 2 [Source:MGI Symbol;Acc:MGI:1920904]	54199	1.0779	4.61913	7.5714	8.24315e-08	0.00021042
9	59680144	59718874	38731	+	ENSMUSG00000074259	Gramd2	protein_coding	GRAM domain containing 2 [Source:MGI Symbol;Acc:MGI:3528937]	546134	1.16661	4.04205	7.27381	1.56228e-07	0.000282757
9	77754535	77794485	39951	+	ENSMUSG00000032350	Gclc	protein_coding	glutamate-cysteine ligase, catalytic subunit [Source:MGI Symbol;Acc:MGI:104990]	14629	-1.25791	5.51038	-7.08314	2.37668e-07	0.000282757
9	103482947	103761837	278891	-	ENSMUSG00000042757	Tmem108	protein_coding	transmembrane protein 108 [Source:MGI Symbol;Acc:MGI:1932411]	81907	0.815141	7.8361	6.37673	1.11178e-06	0.000500826
9	66814994	66834726	19733	-	ENSMUSG00000053040	Aph1c	protein_coding	aph1 homolog C, gamma secretase subunit [Source:MGI Symbol;Acc:MGI:1915568]	68318	-1.09283	3.03417	-6.14393	1.92017e-06	0.000625731
9	123977243	123978408	1166	-	ENSMUSG00000064039	Ccr1l1	protein_coding	chemokine (C-C motif) receptor 1-like 1 [Source:MGI Symbol;Acc:MGI:104617]	12770	1.16175	6.39267	6.09356	2.16873e-06	0.000690277
9	118478212	118486132	7921	+	ENSMUSG00000032446	Eomes	protein_coding	eomesodermin [Source:MGI Symbol;Acc:MGI:1201683]	13813	1.56654	0.445324	5.91977	3.3941e-06	0.000732169
9	108053159	108055701	2543	+	ENSMUSG00000032593	Amigo3	protein_coding	adhesion molecule with Ig like domain 3 [Source:MGI Symbol;Acc:MGI:2444854]	320844	1.12848	1.49127	5.73065	5.02937e-06	0.000846482
9	15239045	15259416	20372	+	ENSMUSG00000031937	Vstm5	protein_coding	V-set and transmembrane domain containing 5 [Source:MGI Symbol;Acc:MGI:1916387]	69137	1.91165	2.61193	5.58737	7.773e-06	0.000992093
9	107296026	107302784	6759	+	ENSMUSG00000032578	Cish	protein_coding	cytokine inducible SH2-containing protein [Source:MGI Symbol;Acc:MGI:103159]	12700	-1.2293	1.2284	-5.32716	1.32275e-05	0.00138762
9	56089962	56128888	38927	+	ENSMUSG00000032322	Pstpip1	protein_coding	proline-serine-threonine phosphatase-interacting protein 1 [Source:MGI Symbol;Acc:MGI:1321396]	19200	0.583696	4.95736	5.30366	1.33896e-05	0.00139507
9	121489824	121495694	5871	-	ENSMUSG00000032532	Cck	protein_coding	cholecystokinin [Source:MGI Symbol;Acc:MGI:88297]	12424	-1.95273	0.415221	-5.19528	2.00437e-05	0.00170077
9	45055186	45077436	22251	+	ENSMUSG00000070305	Mpzl3	protein_coding	myelin protein zero-like 3 [Source:MGI Symbol;Acc:MGI:2442647]	319742	0.560694	5.45203	5.04432	2.48612e-05	0.00181622
9	49502136	49798925	296790	-	ENSMUSG00000039542	Ncam1	protein_coding	neural cell adhesion molecule 1 [Source:MGI Symbol;Acc:MGI:97281]	17967	1.71571	4.49614	5.04593	2.78595e-05	0.00194713
9	119102478	119148246	45769	+	ENSMUSG00000038060	Dlec1	protein_coding	deleted in lung and esophageal cancer 1 [Source:MGI Symbol;Acc:MGI:2443671]	320256	-1.24437	0.2034	-4.83451	4.3541e-05	0.0024699
9	108049242	108052801	3560	+	ENSMUSG00000070284	Gmppb	protein_coding	GDP-mannose pyrophosphorylase B [Source:MGI Symbol;Acc:MGI:2660880]	331026	0.682345	4.55386	4.72985	5.31517e-05	0.00270357
9	37539255	37544205	4951	+	ENSMUSG00000001943	Vsig2	protein_coding	V-set and immunoglobulin domain containing 2 [Source:MGI Symbol;Acc:MGI:1928009]	57276	-1.13205	2.2036	-4.71129	5.78981e-05	0.00287841
9	108051534	108083346	31813	-	ENSMUSG00000041528	Rnf123	protein_coding	ring finger protein 123 [Source:MGI Symbol;Acc:MGI:2148796]	84585	-0.615018	3.08276	-4.63017	6.74974e-05	0.00310447
9	87144306	87184045	39740	+	ENSMUSG00000042761	Mrap2	protein_coding	melanocortin 2 receptor accessory protein 2 [Source:MGI Symbol;Acc:MGI:3609239]	244958	-3.30651	-2.54876	-4.70195	7.78562e-05	0.00342858
9	45039799	45054015	14217	+	ENSMUSG00000032092	Mpzl2	protein_coding	myelin protein zero-like 2 [Source:MGI Symbol;Acc:MGI:1289160]	14012	1.38143	1.92553	4.49772	0.000101364	0.00406412
9	119052778	119071525	18748	+	ENSMUSG00000038775	Vill	protein_coding	villin-like [Source:MGI Symbol;Acc:MGI:1201781]	22351	-0.983804	4.41439	-4.44536	0.000108727	0.00417359
9	8971791	8975773	3983	+	ENSMUSG00000078117	Gm16485	TEC	predicted gene 16485 [Source:MGI Symbol;Acc:MGI:3642771]	NA	-1.69958	0.907573	-4.41278	0.000131556	0.00460026
9	21265293	21277772	12480	+	ENSMUSG00000002820	Atg4d	protein_coding	autophagy related 4D, cysteine peptidase [Source:MGI Symbol;Acc:MGI:2444308]	235040	0.449098	4.82868	4.30202	0.000149141	0.0049376
9	6168584	6378850	210267	+	ENSMUSG00000032006	Pdgfd	protein_coding	platelet-derived growth factor, D polypeptide [Source:MGI Symbol;Acc:MGI:1919035]	71785	-1.18523	1.31736	-4.26571	0.000173857	0.00540121
9	107597674	107609229	11556	-	ENSMUSG00000057969	Sema3b	protein_coding	sema domain, immunoglobulin domain (Ig), short basic domain, secreted, (semaphorin) 3B [Source:MGI Symbol;Acc:MGI:107561]	20347	-1.09714	5.24306	-4.22995	0.000187216	0.0056445
9	58006411	58027023	20613	+	ENSMUSG00000032323	Cyp11a1	protein_coding	cytochrome P450, family 11, subfamily a, polypeptide 1 [Source:MGI Symbol;Acc:MGI:88582]	13070	-0.962335	6.86279	-4.14317	0.000227082	0.00628194
9	71110659	71168682	58024	-	ENSMUSG00000032204	Aqp9	protein_coding	aquaporin 9 [Source:MGI Symbol;Acc:MGI:1891066]	64008	-1.4888	-0.387581	-4.09479	0.000279234	0.00697639
9	43221235	43239911	18677	-	ENSMUSG00000032014	Oaf	protein_coding	out at first homolog [Source:MGI Symbol;Acc:MGI:94852]	102644	0.488519	6.58031	3.96711	0.000335867	0.00781784
9	108133718	108138567	4850	+	ENSMUSG00000102224	4930447F24Rik	processed_transcript	RIKEN cDNA 4930447F24 gene [Source:MGI Symbol;Acc:MGI:1924123]	NA	-1.46206	3.43827	-4.01277	0.000340546	0.00790273
9	110621135	110624452	3318	-	ENSMUSG00000032491	Nradd	protein_coding	neurotrophin receptor associated death domain [Source:MGI Symbol;Acc:MGI:1914419]	67169	-0.982389	1.6022	-3.94223	0.000372558	0.00827795
9	8899833	8968611	68779	+	ENSMUSG00000031870	Pgr	protein_coding	progesterone receptor [Source:MGI Symbol;Acc:MGI:97567]	18667	-1.48158	4.05154	-3.96655	0.000383205	0.00840854
9	60712989	60738801	25813	+	ENSMUSG00000034839	Larp6	protein_coding	La ribonucleoprotein domain family, member 6 [Source:MGI Symbol;Acc:MGI:1914807]	67557	-1.38877	1.58842	-3.93277	0.000409694	0.00872723
9	54698873	54716315	17443	+	ENSMUSG00000032285	Dnaja4	protein_coding	DnaJ heat shock protein family (Hsp40) member A4 [Source:MGI Symbol;Acc:MGI:1927638]	58233	-0.572948	2.21062	-3.86155	0.00043445	0.00902199
9	62419492	62537044	117553	-	ENSMUSG00000041729	Coro2b	protein_coding	coronin, actin binding protein, 2B [Source:MGI Symbol;Acc:MGI:2444283]	235431	-1.13117	3.54715	-3.85968	0.000467943	0.00943312
9	37648763	37657312	8550	-	ENSMUSG00000011114	Tbrg1	protein_coding	transforming growth factor beta regulated gene 1 [Source:MGI Symbol;Acc:MGI:1100877]	21376	0.379338	7.84628	3.81744	0.000481791	0.00960822
9	35184551	35200291	15741	-	ENSMUSG00000032041	Tirap	protein_coding	toll-interleukin 1 receptor (TIR) domain-containing adaptor protein [Source:MGI Symbol;Acc:MGI:2152213]	117149	-0.579902	3.39145	-3.79664	0.000508362	0.00994493
9	21766784	21798744	31961	-	ENSMUSG00000032194	Kank2	protein_coding	KN motif and ankyrin repeat domains 2 [Source:MGI Symbol;Acc:MGI:2384568]	235041	-0.645723	5.10923	-3.75471	0.000564645	0.0106112
9	74952884	75032468	79585	+	ENSMUSG00000034858	Fam214a	protein_coding	family with sequence similarity 214, member A [Source:MGI Symbol;Acc:MGI:2387648]	235493	-0.412643	5.20295	-3.74873	0.000568574	0.0106215
9	5345430	5373032	27603	+	ENSMUSG00000025887	Casp12	protein_coding	caspase 12 [Source:MGI Symbol;Acc:MGI:1312922]	12364	-1.35511	1.30365	-3.79508	0.000572294	0.0106246
9	44379490	44392369	12880	+	ENSMUSG00000032115	Hyou1	protein_coding	hypoxia up-regulated 1 [Source:MGI Symbol;Acc:MGI:108030]	12282	0.569201	9.44677	3.73373	0.000591382	0.0108342
9	107906873	107920383	13511	+	ENSMUSG00000032584	Mst1r	protein_coding	macrophage stimulating 1 receptor (c-met-related tyrosine kinase) [Source:MGI Symbol;Acc:MGI:99614]	19882	-1.09073	0.651455	-3.74616	0.000613887	0.0110715
9	36890982	37147407	256426	-	ENSMUSG00000035934	Pknox2	protein_coding	Pbx/knotted 1 homeobox 2 [Source:MGI Symbol;Acc:MGI:2445415]	208076	-1.10057	4.2624	-3.7449	0.000616918	0.0110715
9	75369062	75410005	40944	-	ENSMUSG00000042688	Mapk6	protein_coding	mitogen-activated protein kinase 6 [Source:MGI Symbol;Acc:MGI:1354946]	50772	0.410673	6.75647	3.63878	0.000740461	0.0122813
9	40685962	40785319	99358	+	ENSMUSG00000032024	Clmp	protein_coding	CXADR-like membrane protein [Source:MGI Symbol;Acc:MGI:1918816]	71566	-1.06787	5.21665	-3.65421	0.000765785	0.0124813
9	71215789	71296243	80455	+	ENSMUSG00000013584	Aldh1a2	protein_coding	aldehyde dehydrogenase family 1, subfamily A2 [Source:MGI Symbol;Acc:MGI:107928]	19378	-2.13217	1.09273	-3.72433	0.000777071	0.0125412
9	59518685	59539847	21163	-	ENSMUSG00000049526	Tmem202	protein_coding	transmembrane protein 202 [Source:MGI Symbol;Acc:MGI:1921143]	73893	-1.20054	-0.398312	-3.65144	0.000791329	0.0126513
9	95399292	95406722	7431	-	ENSMUSG00000033350	Chst2	protein_coding	carbohydrate sulfotransferase 2 [Source:MGI Symbol;Acc:MGI:1891160]	54371	-0.631536	4.4437	-3.6027	0.000813689	0.0128856
9	48318006	48353454	35449	-	ENSMUSG00000032028	Nxpe2	protein_coding	neurexophilin and PC-esterase domain family, member 2 [Source:MGI Symbol;Acc:MGI:1925502]	78252	-1.36057	0.657968	-3.63948	0.000841298	0.0130938
9	44336339	44344228	7890	-	ENSMUSG00000032126	Hmbs	protein_coding	hydroxymethylbilane synthase [Source:MGI Symbol;Acc:MGI:96112]	15288	0.478073	5.04743	3.57429	0.000864884	0.0132333
9	61953481	62026856	73376	-	ENSMUSG00000032278	Paqr5	protein_coding	progestin and adipoQ receptor family member V [Source:MGI Symbol;Acc:MGI:1921340]	74090	-1.23294	-0.0506188	-3.5703	0.000972317	0.0142507
9	116084293	116175360	91068	-	ENSMUSG00000032440	Tgfbr2	protein_coding	transforming growth factor, beta receptor II [Source:MGI Symbol;Acc:MGI:98729]	21813	-0.662942	7.14792	-3.5093	0.00102114	0.0147267
9	56865033	56899870	34838	+	ENSMUSG00000032911	Cspg4	protein_coding	chondroitin sulfate proteoglycan 4 [Source:MGI Symbol;Acc:MGI:2153093]	121021	-1.05695	2.07613	-3.50386	0.00110362	0.0154225
9	62341293	62378812	37520	+	ENSMUSG00000032249	Anp32a	protein_coding	acidic (leucine-rich) nuclear phosphoprotein 32 family, member A [Source:MGI Symbol;Acc:MGI:108447]	11737	-0.579005	4.43021	-3.46434	0.00112944	0.0156457
9	106470322	106476949	6628	-	ENSMUSG00000023249	Parp3	protein_coding	poly (ADP-ribose) polymerase family, member 3 [Source:MGI Symbol;Acc:MGI:1891258]	235587	-1.23699	2.49893	-3.48384	0.00120325	0.0162643
9	108296853	108302302	5450	+	ENSMUSG00000032607	Amt	protein_coding	aminomethyltransferase [Source:MGI Symbol;Acc:MGI:3646700]	434437	0.609071	3.75835	3.43305	0.00121968	0.0163865
9	62858080	62875921	17842	+	ENSMUSG00000032246	Calml4	protein_coding	calmodulin-like 4 [Source:MGI Symbol;Acc:MGI:1922850]	75600	0.822888	2.23669	3.43956	0.00123395	0.0164915
9	35421128	35507652	86525	+	ENSMUSG00000038119	Cdon	protein_coding	cell adhesion molecule-related/down-regulated by oncogenes [Source:MGI Symbol;Acc:MGI:1926387]	57810	0.68948	3.90515	3.39449	0.00134837	0.0174276
9	57687928	57703824	15897	+	ENSMUSG00000032315	Cyp1a1	protein_coding	cytochrome P450, family 1, subfamily a, polypeptide 1 [Source:MGI Symbol;Acc:MGI:88588]	13076	2.49298	-1.15623	3.50948	0.00138541	0.0177636
9	7502352	7510240	7889	+	ENSMUSG00000047562	Mmp10	protein_coding	matrix metallopeptidase 10 [Source:MGI Symbol;Acc:MGI:97007]	17384	-1.18765	2.25064	-3.40441	0.00144637	0.0182777
9	120301513	120474841	173329	+	ENSMUSG00000041794	Myrip	protein_coding	myosin VIIA and Rab interacting protein [Source:MGI Symbol;Acc:MGI:2384407]	245049	1.17956	0.952042	3.39959	0.00146096	0.018425
9	58488603	58499780	11178	+	ENSMUSG00000066607	Insyn1	protein_coding	inhibitory synaptic factor 1 [Source:MGI Symbol;Acc:MGI:2442108]	319477	1.49057	2.78214	3.39482	0.00157727	0.019476
9	122380575	122398801	18227	-	ENSMUSG00000093598	A730085K08Rik	antisense	RIKEN cDNA A730085K08 gene [Source:MGI Symbol;Acc:MGI:3605633]	NA	1.19296	0.106373	3.3483	0.00166073	0.0199496
9	78615546	78716253	100708	+	ENSMUSG00000046186	Cd109	protein_coding	CD109 antigen [Source:MGI Symbol;Acc:MGI:2445221]	235505	-1.22977	6.68629	-3.31678	0.00180808	0.0210701
9	20667690	20746349	78660	-	ENSMUSG00000032172	Olfm2	protein_coding	olfactomedin 2 [Source:MGI Symbol;Acc:MGI:3045350]	244723	-1.09662	0.663709	-3.29998	0.00182866	0.021221
9	37544492	37552904	8413	-	ENSMUSG00000053310	Nrgn	protein_coding	neurogranin [Source:MGI Symbol;Acc:MGI:1927184]	64011	-1.07871	5.82939	-3.2892	0.00186965	0.0216117
9	114401076	114474898	73823	+	ENSMUSG00000045594	Glb1	protein_coding	galactosidase, beta 1 [Source:MGI Symbol;Acc:MGI:88151]	12091	-0.357969	6.29385	-3.22587	0.0019739	0.0223942
9	98955288	98958543	3256	+	ENSMUSG00000050397	Foxl2	protein_coding	forkhead box L2 [Source:MGI Symbol;Acc:MGI:1349428]	26927	-1.23425	1.08599	-3.28036	0.00197804	0.0224246
9	22099216	22109630	10415	+	ENSMUSG00000001349	Cnn1	protein_coding	calponin 1 [Source:MGI Symbol;Acc:MGI:104979]	12797	-2.03853	-0.819305	-3.29871	0.00219536	0.0238442
9	110243783	110262576	18794	+	ENSMUSG00000032482	Cspg5	protein_coding	chondroitin sulfate proteoglycan 5 [Source:MGI Symbol;Acc:MGI:1352747]	29873	0.87841	2.39821	3.20142	0.0022108	0.0239128
9	119357381	119393797	36417	+	ENSMUSG00000035769	Xylb	protein_coding	xylulokinase homolog (H. influenzae) [Source:MGI Symbol;Acc:MGI:2142985]	102448	0.423921	6.1837	3.1662	0.00227141	0.0243791
9	44793769	44799307	5539	-	ENSMUSG00000002032	Tmem25	protein_coding	transmembrane protein 25 [Source:MGI Symbol;Acc:MGI:1918937]	71687	0.891015	0.415582	3.18055	0.00233044	0.0247868
9	90202027	90270804	68778	-	ENSMUSG00000037410	Tbc1d2b	protein_coding	TBC1 domain family, member 2B [Source:MGI Symbol;Acc:MGI:1914266]	67016	-0.829595	3.55142	-3.17007	0.00235879	0.0250015
9	79805094	80012851	207758	-	ENSMUSG00000034898	Filip1	protein_coding	filamin A interacting protein 1 [Source:MGI Symbol;Acc:MGI:1917848]	70598	-0.818672	1.93466	-3.1671	0.00237029	0.0250714
9	70599014	70657174	58161	-	ENSMUSG00000042444	Mindy2	protein_coding	MINDY lysine 48 deubiquitinase 2 [Source:MGI Symbol;Acc:MGI:2443086]	235461	-0.568758	3.4653	-3.14236	0.0024192	0.0253784
9	44334694	44336077	1384	+	ENSMUSG00000049932	H2ax	protein_coding	H2A.X variant histone [Source:MGI Symbol;Acc:MGI:102688]	15270	0.497405	5.29219	3.10043	0.0026549	0.0268932
9	100597798	100959375	361578	+	ENSMUSG00000037286	Stag1	protein_coding	stromal antigen 1 [Source:MGI Symbol;Acc:MGI:1098658]	20842	0.421677	6.48403	3.09618	0.00267428	0.0270455
9	13297957	13709388	411432	+	ENSMUSG00000031925	Maml2	protein_coding	mastermind like transcriptional coactivator 2 [Source:MGI Symbol;Acc:MGI:2389460]	270118	-0.460737	3.45125	-3.09577	0.00267963	0.0270721
9	36821864	36878924	57061	+	ENSMUSG00000032118	Fez1	protein_coding	fasciculation and elongation protein zeta 1 (zygin I) [Source:MGI Symbol;Acc:MGI:2670976]	235180	-1.11213	2.06495	-3.11655	0.00286152	0.0282573
9	72128587	72129391	805	+	ENSMUSG00000099253	Gm7863	processed_pseudogene	predicted gene 7863 [Source:MGI Symbol;Acc:MGI:3647996]	NA	1.28922	0.347984	3.10629	0.00305763	0.0297905
9	55326913	55438345	111433	+	ENSMUSG00000032313	Tmem266	protein_coding	transmembrane protein 266 [Source:MGI Symbol;Acc:MGI:2142980]	244886	-0.919334	0.543064	-3.05464	0.00316935	0.0303766
9	103353094	103365840	12747	-	ENSMUSG00000032803	Cdv3	protein_coding	carnitine deficiency-associated gene expressed in ventricle 3 [Source:MGI Symbol;Acc:MGI:2448759]	321022	0.354749	7.1879	3.00938	0.00326759	0.0310462
9	20907209	20959888	52680	-	ENSMUSG00000004099	Dnmt1	protein_coding	DNA methyltransferase (cytosine-5) 1 [Source:MGI Symbol;Acc:MGI:94912]	13433	0.489195	6.12441	2.99804	0.00336599	0.0315312
9	76490054	76567116	77063	-	ENSMUSG00000032358	Fam83b	protein_coding	family with sequence similarity 83, member B [Source:MGI Symbol;Acc:MGI:2685362]	208994	0.764203	3.38503	2.99853	0.00349471	0.0323131
9	80165031	80311729	146699	+	ENSMUSG00000033577	Myo6	protein_coding	myosin VI [Source:MGI Symbol;Acc:MGI:104785]	17920	-0.620554	4.95171	-2.98707	0.00349821	0.0323131
9	21958897	21963506	4610	-	ENSMUSG00000006235	Epor	protein_coding	erythropoietin receptor [Source:MGI Symbol;Acc:MGI:95408]	13857	1.47474	1.64265	3.05578	0.0035987	0.0330243
9	99036654	99140621	103968	-	ENSMUSG00000032462	Pik3cb	protein_coding	phosphatidylinositol-4,5-bisphosphate 3-kinase catalytic subunit beta [Source:MGI Symbol;Acc:MGI:1922019]	74769	0.417074	7.57621	2.94784	0.00376793	0.0339174
9	92538801	92542869	4069	-	ENSMUSG00000103622	Gm38391	TEC	predicted gene, 38391 [Source:MGI Symbol;Acc:MGI:5613630]	NA	-1.05214	-0.857221	-2.98041	0.00391051	0.0347339
9	122117266	122169702	52437	+	ENSMUSG00000038145	Snrk	protein_coding	SNF related kinase [Source:MGI Symbol;Acc:MGI:108104]	20623	-0.566351	5.18064	-2.91806	0.00407597	0.0356322
9	65398506	65414853	16348	+	ENSMUSG00000041696	Rasl12	protein_coding	RAS-like, family 12 [Source:MGI Symbol;Acc:MGI:1918034]	70784	-1.22296	0.958122	-2.97831	0.00410028	0.035763
9	59966931	60522046	555116	-	ENSMUSG00000032289	Thsd4	protein_coding	thrombospondin, type I, domain containing 4 [Source:MGI Symbol;Acc:MGI:2672033]	207596	-0.921829	3.04894	-2.94589	0.00410736	0.0358044
9	21592722	21595970	3249	+	ENSMUSG00000048429	Timm29	protein_coding	translocase of inner mitochondrial membrane 29 [Source:MGI Symbol;Acc:MGI:1917023]	69773	0.35387	5.21529	2.90851	0.00411968	0.0358709
9	119444943	119465517	20575	+	ENSMUSG00000042787	Exog	protein_coding	endo/exonuclease (5'-3'), endonuclease G-like [Source:MGI Symbol;Acc:MGI:2143333]	208194	0.410431	3.04351	2.90065	0.00419764	0.0363862
9	111052781	111053193	413	-	ENSMUSG00000104654	Gm43814	TEC	predicted gene 43814 [Source:MGI Symbol;Acc:MGI:5663951]	NA	1.07399	-1.40225	2.95299	0.00419866	0.0363862
9	50739691	50746536	6846	-	ENSMUSG00000032062	2310030G06Rik	protein_coding	RIKEN cDNA 2310030G06 gene [Source:MGI Symbol;Acc:MGI:1914202]	66952	0.385717	5.77214	2.89647	0.00423602	0.0365721
9	119402118	119434995	32878	+	ENSMUSG00000061393	Acvr2b	protein_coding	activin receptor IIB [Source:MGI Symbol;Acc:MGI:87912]	11481	0.612138	5.10339	2.90078	0.00426818	0.0367875
9	101074101	101104800	30700	+	ENSMUSG00000066415	Msl2	protein_coding	MSL complex subunit 2 [Source:MGI Symbol;Acc:MGI:1925103]	77853	0.360322	5.58307	2.8766	0.00443116	0.0377462
9	62791821	62811934	20114	-	ENSMUSG00000032244	Fem1b	protein_coding	fem 1 homolog b [Source:MGI Symbol;Acc:MGI:1335087]	14155	0.501546	7.10204	2.83634	0.00488398	0.0401741
9	48591877	48605153	13277	-	ENSMUSG00000032271	Nnmt	protein_coding	nicotinamide N-methyltransferase [Source:MGI Symbol;Acc:MGI:1099443]	18113	-1.00344	0.200126	-2.87415	0.00497351	0.0406263
9	92457373	92492456	35084	+	ENSMUSG00000032377	Plscr4	protein_coding	phospholipid scramblase 4 [Source:MGI Symbol;Acc:MGI:2143267]	235527	-1.28011	-1.37775	-2.90211	0.00499098	0.0407256
9	96765562	96782477	16916	+	ENSMUSG00000101581	C430002N11Rik	processed_transcript	RIKEN cDNA C430002N11 gene [Source:MGI Symbol;Acc:MGI:2442576]	NA	-1.12548	1.70316	-2.88143	0.00504672	0.0410273
9	22188090	22202123	14034	+	ENSMUSG00000074472	Zfp872	protein_coding	zinc finger protein 872 [Source:MGI Symbol;Acc:MGI:3588272]	619310	0.890925	-0.512329	2.83216	0.00532971	0.0425599
9	94669909	95230445	560537	+	ENSMUSG00000031129	Slc9a9	protein_coding	solute carrier family 9 (sodium/hydrogen exchanger), member 9 [Source:MGI Symbol;Acc:MGI:2679732]	331004	-0.859406	0.264668	-2.82818	0.00533504	0.0425765
9	69453620	69491795	38176	+	ENSMUSG00000032231	Anxa2	protein_coding	annexin A2 [Source:MGI Symbol;Acc:MGI:88246]	12306	0.407653	9.36581	2.77387	0.00559832	0.0440389
9	51054640	51077094	22455	-	ENSMUSG00000060594	Layn	protein_coding	layilin [Source:MGI Symbol;Acc:MGI:2685357]	244864	-0.907587	1.06467	-2.80614	0.00569128	0.0446784
9	18321951	18402995	81045	-	ENSMUSG00000043943	Naalad2	protein_coding	N-acetylated alpha-linked acidic dipeptidase 2 [Source:MGI Symbol;Acc:MGI:1919810]	72560	-1.15254	1.4458	-2.83034	0.00573936	0.0448912
9	43310848	43336115	25268	+	ENSMUSG00000032013	Trim29	protein_coding	tripartite motif-containing 29 [Source:MGI Symbol;Acc:MGI:1919419]	72169	-0.799237	2.69825	-2.76237	0.00612323	0.0467348
9	43123939	43210369	86431	-	ENSMUSG00000032015	Pou2f3	protein_coding	POU domain, class 2, transcription factor 3 [Source:MGI Symbol;Acc:MGI:102565]	18988	0.506234	4.43872	2.73454	0.00615622	0.0468632
9	120013755	120023598	9844	-	ENSMUSG00000079243	Xirp1	protein_coding	xin actin-binding repeat containing 1 [Source:MGI Symbol;Acc:MGI:1333878]	22437	-0.672726	1.6264	-2.73759	0.00628548	0.0474367
9	106453291	106464012	10722	+	ENSMUSG00000023495	Pcbp4	protein_coding	poly(rC) binding protein 4 [Source:MGI Symbol;Acc:MGI:1890471]	59092	-0.466606	3.42448	-2.71893	0.0063544	0.0477938
9	31426196	31464462	38267	-	ENSMUSG00000041737	Tmem45b	protein_coding	transmembrane protein 45b [Source:MGI Symbol;Acc:MGI:2384574]	235135	-0.99694	1.92664	-2.76928	0.00636105	0.0477938
9	44134469	44142727	8259	+	ENSMUSG00000032135	Mcam	protein_coding	melanoma cell adhesion molecule [Source:MGI Symbol;Acc:MGI:1933966]	84004	-0.764878	4.40736	-2.72714	0.00658461	0.0488997
9	66088133	66126587	38455	-	ENSMUSG00000032382	Snx1	protein_coding	sorting nexin 1 [Source:MGI Symbol;Acc:MGI:1928395]	56440	-0.292431	6.87433	-2.7009	0.00658658	0.0488997
9	95752642	95845311	92670	-	ENSMUSG00000049493	Pls1	protein_coding	plastin 1 (I-isoform) [Source:MGI Symbol;Acc:MGI:104809]	102502	-1.02853	3.98471	-2.75696	0.00660576	0.0489855
8	80764438	80880519	116082	-	ENSMUSG00000031714	Gab1	protein_coding	growth factor receptor bound protein 2-associated protein 1 [Source:MGI Symbol;Acc:MGI:108088]	14388	1.12304	7.12565	6.99556	2.84823e-07	0.000290823
8	88272403	88329962	57560	+	ENSMUSG00000031659	Adcy7	protein_coding	adenylate cyclase 7 [Source:MGI Symbol;Acc:MGI:102891]	11513	0.803205	7.38069	6.407	1.03784e-06	0.000500826
8	47180048	47446362	266315	-	ENSMUSG00000038143	Stox2	protein_coding	storkhead box 2 [Source:MGI Symbol;Acc:MGI:1918319]	71069	1.10275	3.71738	6.06615	2.29852e-06	0.000690277
8	111889136	111910447	21312	-	ENSMUSG00000031952	Chst5	protein_coding	carbohydrate (N-acetylglucosamine 6-O) sulfotransferase 5 [Source:MGI Symbol;Acc:MGI:1931825]	56773	-2.70806	0.494006	-6.12732	2.39944e-06	0.000706661
8	105252638	105255153	2516	-	ENSMUSG00000069920	B3gnt9	protein_coding	UDP-GlcNAc:betaGal beta-1,3-N-acetylglucosaminyltransferase 9 [Source:MGI Symbol;Acc:MGI:2142841]	97440	-1.10135	0.982006	-5.91512	3.26069e-06	0.000722552
8	34807297	34819894	12598	+	ENSMUSG00000031530	Dusp4	protein_coding	dual specificity phosphatase 4 [Source:MGI Symbol;Acc:MGI:2442191]	319520	-0.942465	4.61729	-5.77131	4.50497e-06	0.000811874
8	40551095	40634797	83703	-	ENSMUSG00000039431	Mtmr7	protein_coding	myotubularin related protein 7 [Source:MGI Symbol;Acc:MGI:1891693]	54384	0.674916	4.49321	5.68219	5.48804e-06	0.000856545
8	95352268	95375080	22813	+	ENSMUSG00000031790	Mmp15	protein_coding	matrix metallopeptidase 15 [Source:MGI Symbol;Acc:MGI:109320]	17388	1.31147	8.36484	5.63219	6.46672e-06	0.00093991
8	84976910	84978718	1809	-	ENSMUSG00000052837	Junb	protein_coding	jun B proto-oncogene [Source:MGI Symbol;Acc:MGI:96647]	16477	-0.699116	5.31853	-5.43453	9.83799e-06	0.00116805
8	95017692	95045250	27559	+	ENSMUSG00000060470	Adgrg3	protein_coding	adhesion G protein-coupled receptor G3 [Source:MGI Symbol;Acc:MGI:1859670]	54672	0.845506	5.82745	5.36936	1.15515e-05	0.0013009
8	36094828	36147787	52960	+	ENSMUSG00000050271	Prag1	protein_coding	PEAK1 related kinase activating pseudokinase 1 [Source:MGI Symbol;Acc:MGI:1196223]	244418	-0.946638	4.29497	-5.36027	1.18834e-05	0.00131864
8	15011025	15033333	22309	+	ENSMUSG00000055675	Kbtbd11	protein_coding	kelch repeat and BTB (POZ) domain containing 11 [Source:MGI Symbol;Acc:MGI:1922151]	74901	1.14756	2.30302	5.24558	1.59295e-05	0.00149811
8	94772009	94782427	10419	+	ENSMUSG00000031778	Cx3cl1	protein_coding	chemokine (C-X3-C motif) ligand 1 [Source:MGI Symbol;Acc:MGI:1097153]	20312	-1.02489	3.98775	-5.23722	1.60464e-05	0.00149811
8	70083457	70090862	7406	+	ENSMUSG00000007594	Hapln4	protein_coding	hyaluronan and proteoglycan link protein 4 [Source:MGI Symbol;Acc:MGI:2679531]	330790	0.795976	3.73657	5.21948	1.64637e-05	0.00150993
8	25806555	25815982	9428	+	ENSMUSG00000031574	Star	protein_coding	steroidogenic acute regulatory protein [Source:MGI Symbol;Acc:MGI:102760]	20845	0.891061	5.78859	5.07673	2.33118e-05	0.00180325
8	120736358	120756694	20337	+	ENSMUSG00000041515	Irf8	protein_coding	interferon regulatory factor 8 [Source:MGI Symbol;Acc:MGI:96395]	15900	1.13323	4.07325	4.95748	3.18382e-05	0.00207504
8	125910450	125947440	36991	+	ENSMUSG00000031853	Map3k21	protein_coding	mitogen-activated protein kinase kinase kinase 21 [Source:MGI Symbol;Acc:MGI:2385307]	234878	1.12862	5.08281	4.92551	3.43815e-05	0.00216029
8	4493026	4531680	38655	+	ENSMUSG00000008206	Cers4	protein_coding	ceramide synthase 4 [Source:MGI Symbol;Acc:MGI:1914510]	67260	-0.978238	1.57551	-4.90286	3.57166e-05	0.00218814
8	72814599	73353540	538942	-	ENSMUSG00000004383	Large1	protein_coding	LARGE xylosyl- and glucuronyltransferase 1 [Source:MGI Symbol;Acc:MGI:1342270]	16795	-0.830114	5.24419	-4.88923	3.64552e-05	0.00221535
8	119666365	119688222	21858	+	ENSMUSG00000023336	Wfdc1	protein_coding	WAP four-disulfide core domain 1 [Source:MGI Symbol;Acc:MGI:1915116]	67866	-1.02057	4.1544	-4.84105	4.1666e-05	0.00239908
8	106510891	106557297	46407	+	ENSMUSG00000061048	Cdh3	protein_coding	cadherin 3 [Source:MGI Symbol;Acc:MGI:88356]	12560	0.628877	8.46998	4.79961	4.48357e-05	0.00253396
8	92855339	92919279	63941	+	ENSMUSG00000033192	Lpcat2	protein_coding	lysophosphatidylcholine acyltransferase 2 [Source:MGI Symbol;Acc:MGI:3606214]	270084	-1.04226	1.71913	-4.64442	6.73715e-05	0.00310447
8	92827291	92853420	26130	+	ENSMUSG00000031740	Mmp2	protein_coding	matrix metallopeptidase 2 [Source:MGI Symbol;Acc:MGI:97009]	17390	-1.67854	5.15556	-4.6156	7.94676e-05	0.0034676
8	36457548	36516570	59023	+	ENSMUSG00000039620	Trmt9b	protein_coding	tRNA methyltransferase 9B [Source:MGI Symbol;Acc:MGI:2442328]	319582	1.16454	2.14623	4.52732	9.11727e-05	0.00383627
8	57488054	57508877	20824	+	ENSMUSG00000096917	2500002B13Rik	processed_transcript	RIKEN cDNA 2500002B13 gene [Source:MGI Symbol;Acc:MGI:1925603]	NA	-1.12361	0.556691	-4.51906	9.24939e-05	0.0038812
8	71690756	71701789	11034	-	ENSMUSG00000031803	B3gnt3	protein_coding	UDP-GlcNAc:betaGal beta-1,3-N-acetylglucosaminyltransferase 3 [Source:MGI Symbol;Acc:MGI:2152535]	72297	-0.681355	5.31828	-4.48136	9.7035e-05	0.00395697
8	83900105	83941954	41850	+	ENSMUSG00000013033	Adgrl1	protein_coding	adhesion G protein-coupled receptor L1 [Source:MGI Symbol;Acc:MGI:1929461]	330814	1.30602	3.41422	4.48075	0.00010443	0.00411947
8	68880491	68907448	26958	+	ENSMUSG00000015568	Lpl	protein_coding	lipoprotein lipase [Source:MGI Symbol;Acc:MGI:96820]	16956	-1.25569	4.96554	-4.45012	0.000111708	0.00418703
8	45885461	45919548	34088	+	ENSMUSG00000031636	Pdlim3	protein_coding	PDZ and LIM domain 3 [Source:MGI Symbol;Acc:MGI:1859274]	53318	-1.92769	0.773123	-4.4418	0.000126786	0.00449503
8	119700009	119757717	57709	+	ENSMUSG00000034112	Atp2c2	protein_coding	ATPase, Ca++ transporting, type 2C, member 2 [Source:MGI Symbol;Acc:MGI:1916297]	69047	1.21824	1.91399	4.35815	0.000139227	0.00474923
8	69907076	69996384	89309	-	ENSMUSG00000036180	Gatad2a	protein_coding	GATA zinc finger domain containing 2A [Source:MGI Symbol;Acc:MGI:2384585]	234366	0.453893	6.76628	4.32931	0.000139594	0.00475115
8	75093621	75100589	6969	+	ENSMUSG00000005413	Hmox1	protein_coding	heme oxygenase 1 [Source:MGI Symbol;Acc:MGI:96163]	15368	0.603719	7.21442	4.31262	0.00014571	0.00488337
8	91070057	91123844	53788	+	ENSMUSG00000031666	Rbl2	protein_coding	RB transcriptional corepressor like 2 [Source:MGI Symbol;Acc:MGI:105085]	19651	-0.541404	3.64144	-4.28755	0.000154613	0.00507077
8	84841850	84846934	5085	-	ENSMUSG00000003814	Calr	protein_coding	calreticulin [Source:MGI Symbol;Acc:MGI:88252]	12317	0.643656	12.18	4.25177	0.000169161	0.0052875
8	71366848	71369732	2885	+	ENSMUSG00000002395	Use1	protein_coding	unconventional SNARE in the ER 1 homolog (S. cerevisiae) [Source:MGI Symbol;Acc:MGI:1914273]	67023	-0.549792	4.48006	-4.2128	0.000185383	0.00561133
8	84872111	84888221	16111	+	ENSMUSG00000003824	Syce2	protein_coding	synaptonemal complex central element protein 2 [Source:MGI Symbol;Acc:MGI:1919096]	71846	0.712187	4.19257	4.19113	0.000196766	0.00580668
8	31814551	32884797	1070247	-	ENSMUSG00000062991	Nrg1	protein_coding	neuregulin 1 [Source:MGI Symbol;Acc:MGI:96083]	211323	-1.97881	0.565147	-4.21162	0.000226176	0.00628194
8	123140192	123158315	18124	-	ENSMUSG00000000739	Sult5a1	protein_coding	sulfotransferase family 5A, member 1 [Source:MGI Symbol;Acc:MGI:1931463]	57429	-1.77793	-1.47126	-4.15078	0.000255091	0.00661746
8	69880369	69887687	7319	-	ENSMUSG00000044006	Cilp2	protein_coding	cartilage intermediate layer protein 2 [Source:MGI Symbol;Acc:MGI:1915959]	68709	1.2331	1.71663	4.10655	0.000259371	0.00665491
8	85036915	85057583	20669	+	ENSMUSG00000031691	Tnpo2	protein_coding	transportin 2 (importin 3, karyopherin beta 2b) [Source:MGI Symbol;Acc:MGI:2384849]	212999	0.516371	5.4308	4.07324	0.000259863	0.00665491
8	3493138	3497208	4071	+	ENSMUSG00000047264	Zfp358	protein_coding	zinc finger protein 358 [Source:MGI Symbol;Acc:MGI:2153740]	140482	-0.743866	3.72988	-4.0149	0.000302812	0.00730285
8	120228456	120581390	352935	+	ENSMUSG00000031822	Gse1	protein_coding	genetic suppressor element 1, coiled-coil protein [Source:MGI Symbol;Acc:MGI:1098275]	382034	0.591916	5.61537	3.93509	0.000363915	0.00815469
8	57320983	57324633	3651	+	ENSMUSG00000038193	Hand2	protein_coding	heart and neural crest derivatives expressed 2 [Source:MGI Symbol;Acc:MGI:103580]	15111	-1.27503	3.8216	-3.95521	0.00037961	0.00837768
8	72161200	72183904	22705	+	ENSMUSG00000003037	Rab8a	protein_coding	RAB8A, member RAS oncogene family [Source:MGI Symbol;Acc:MGI:96960]	17274	0.395008	6.64691	3.90784	0.000387352	0.00847359
8	72319033	72321656	2624	+	ENSMUSG00000055148	Klf2	protein_coding	Kruppel-like factor 2 (lung) [Source:MGI Symbol;Acc:MGI:1342772]	16598	-0.730781	5.46918	-3.90488	0.000395184	0.0085853
8	56294585	56321043	26459	+	ENSMUSG00000031613	Hpgd	protein_coding	hydroxyprostaglandin dehydrogenase 15 (NAD) [Source:MGI Symbol;Acc:MGI:108085]	15446	-1.17949	5.6874	-3.92871	0.000398292	0.00861934
8	95332284	95347507	15224	+	ENSMUSG00000031792	Usb1	protein_coding	U6 snRNA biogenesis 1 [Source:MGI Symbol;Acc:MGI:2142454]	101985	0.49542	5.29509	3.89023	0.000404518	0.00866518
8	84856989	84869257	12269	+	ENSMUSG00000003808	Farsa	protein_coding	phenylalanyl-tRNA synthetase, alpha subunit [Source:MGI Symbol;Acc:MGI:1913840]	66590	0.44939	5.69399	3.86197	0.000432846	0.00902199
8	45304944	45333216	28273	-	ENSMUSG00000079057	Cyp4v3	protein_coding	cytochrome P450, family 4, subfamily v, polypeptide 3 [Source:MGI Symbol;Acc:MGI:2142763]	102294	-0.91373	4.18029	-3.85087	0.000460962	0.00940093
8	22974844	23150497	175654	+	ENSMUSG00000031543	Ank1	protein_coding	ankyrin 1, erythroid [Source:MGI Symbol;Acc:MGI:88024]	11733	-1.08147	1.32766	-3.85609	0.0004679	0.00943312
8	70184340	70212305	27966	-	ENSMUSG00000002346	Slc25a42	protein_coding	solute carrier family 25, member 42 [Source:MGI Symbol;Acc:MGI:1920345]	73095	-1.14288	1.99966	-3.78892	0.000558092	0.0105056
8	70373558	70382066	8509	+	ENSMUSG00000031849	Comp	protein_coding	cartilage oligomeric matrix protein [Source:MGI Symbol;Acc:MGI:88469]	12845	1.19849	-0.305402	3.78487	0.000569631	0.0106215
8	35375739	35388139	12401	+	ENSMUSG00000046794	Ppp1r3b	protein_coding	protein phosphatase 1, regulatory subunit 3B [Source:MGI Symbol;Acc:MGI:2177268]	244416	0.622436	5.68519	3.74541	0.000576575	0.0106781
8	71988482	72009626	21145	-	ENSMUSG00000003484	Cyp4f18	protein_coding	cytochrome P450, family 4, subfamily f, polypeptide 18 [Source:MGI Symbol;Acc:MGI:1919304]	72054	1.05559	1.20253	3.74262	0.000615233	0.0110715
8	121590361	121598760	8400	+	ENSMUSG00000031812	Map1lc3b	protein_coding	microtubule-associated protein 1 light chain 3 beta [Source:MGI Symbol;Acc:MGI:1914693]	67443	-0.494948	6.90181	-3.70722	0.00062889	0.0111872
8	89027235	89044162	16928	-	ENSMUSG00000031665	Sall1	protein_coding	spalt like transcription factor 1 [Source:MGI Symbol;Acc:MGI:1889585]	58198	0.586078	4.69893	3.69353	0.000652041	0.0114087
8	47667178	47675556	8379	-	ENSMUSG00000063049	Ing2	protein_coding	inhibitor of growth family, member 2 [Source:MGI Symbol;Acc:MGI:1916510]	69260	0.543793	4.52801	3.675	0.000680509	0.0117505
8	46471037	46536051	65015	+	ENSMUSG00000018796	Acsl1	protein_coding	acyl-CoA synthetase long-chain family member 1 [Source:MGI Symbol;Acc:MGI:102797]	14081	-0.882975	4.80967	-3.68111	0.00069397	0.0118789
8	115682942	115707794	24853	-	ENSMUSG00000055435	Maf	protein_coding	avian musculoaponeurotic fibrosarcoma oncogene homolog [Source:MGI Symbol;Acc:MGI:96909]	17132	-1.20523	3.99734	-3.69533	0.000711006	0.0120595
8	11453518	11478710	25193	-	ENSMUSG00000031504	Rab20	protein_coding	RAB20, member RAS oncogene family [Source:MGI Symbol;Acc:MGI:102789]	19332	-0.498644	3.10825	-3.63614	0.000746066	0.0123266
8	48099092	48153233	54142	+	ENSMUSG00000031562	Dctd	protein_coding	dCMP deaminase [Source:MGI Symbol;Acc:MGI:2444529]	320685	1.14891	-0.12438	3.66966	0.000749	0.0123484
8	87468405	87472609	4205	-	ENSMUSG00000031654	Cbln1	protein_coding	cerebellin 1 precursor protein [Source:MGI Symbol;Acc:MGI:88281]	12404	2.3202	-1.41099	3.72734	0.00079085	0.0126513
8	118283733	119324921	1041189	+	ENSMUSG00000031841	Cdh13	protein_coding	cadherin 13 [Source:MGI Symbol;Acc:MGI:99551]	12554	-1.33078	5.86967	-3.633	0.000849827	0.0131607
8	92960079	93001667	41589	+	ENSMUSG00000055368	Slc6a2	protein_coding	solute carrier family 6 (neurotransmitter transporter, noradrenalin), member 2 [Source:MGI Symbol;Acc:MGI:1270850]	20538	0.487831	7.69911	3.56625	0.000881872	0.0133656
8	78509346	78734003	224658	+	ENSMUSG00000031684	Slc10a7	protein_coding	solute carrier family 10 (sodium/bile acid cotransporter family), member 7 [Source:MGI Symbol;Acc:MGI:1924025]	76775	0.440857	4.55981	3.56573	0.000882254	0.0133656
8	83723251	83741326	18076	-	ENSMUSG00000002885	Adgre5	protein_coding	adhesion G protein-coupled receptor E5 [Source:MGI Symbol;Acc:MGI:1347095]	26364	-0.82556	3.66998	-3.56095	0.000920647	0.0137299
8	72646711	72717876	71166	+	ENSMUSG00000048148	Nwd1	protein_coding	NACHT and WD repeat domain containing 1 [Source:MGI Symbol;Acc:MGI:2442268]	319555	1.13692	2.31545	3.57316	0.000946805	0.0139839
8	85083270	85098282	15013	+	ENSMUSG00000005142	Man2b1	protein_coding	mannosidase 2, alpha B1 [Source:MGI Symbol;Acc:MGI:107286]	17159	-0.456038	6.32586	-3.46476	0.00112292	0.0156067
8	22659212	22706589	47378	-	ENSMUSG00000031537	Ikbkb	protein_coding	inhibitor of kappaB kinase beta [Source:MGI Symbol;Acc:MGI:1338071]	16150	-0.447875	3.92909	-3.45632	0.00114558	0.0157978
8	95420249	95434869	14621	-	ENSMUSG00000031796	Cfap20	protein_coding	cilia and flagella associated protein 20 [Source:MGI Symbol;Acc:MGI:107428]	14894	0.425114	5.06092	3.42618	0.00123034	0.0164863
8	77250366	77517953	267588	-	ENSMUSG00000037148	Arhgap10	protein_coding	Rho GTPase activating protein 10 [Source:MGI Symbol;Acc:MGI:1925764]	78514	0.43796	7.54783	3.40364	0.00129821	0.016963
8	77663031	77724464	61434	-	ENSMUSG00000031616	Ednra	protein_coding	endothelin receptor type A [Source:MGI Symbol;Acc:MGI:105923]	13617	-1.26096	3.00181	-3.42599	0.00139361	0.0178317
8	4226827	4237470	10644	+	ENSMUSG00000046589	Lrrc8e	protein_coding	leucine rich repeat containing 8 family, member E [Source:MGI Symbol;Acc:MGI:1919517]	72267	-1.08587	0.77631	-3.35797	0.00158443	0.0195073
8	94067954	94098928	30975	-	ENSMUSG00000031755	Bbs2	protein_coding	Bardet-Biedl syndrome 2 (human) [Source:MGI Symbol;Acc:MGI:2135267]	67378	-0.497757	2.359	-3.28984	0.00170219	0.0202728
8	23636019	24156585	520567	+	ENSMUSG00000037492	Zmat4	protein_coding	zinc finger, matrin type 4 [Source:MGI Symbol;Acc:MGI:2443497]	320158	1.0042	2.82717	3.31986	0.00170741	0.0203033
8	25601601	25719667	118067	+	ENSMUSG00000054823	Nsd3	protein_coding	nuclear receptor binding SET domain protein 3 [Source:MGI Symbol;Acc:MGI:2142581]	234135	0.482983	7.76283	3.28423	0.00172398	0.0204685
8	70762774	70766663	3890	-	ENSMUSG00000031838	Ifi30	processed_transcript	interferon gamma inducible protein 30 [Source:MGI Symbol;Acc:MGI:2137648]	65972	-0.890246	5.40972	-3.28596	0.00180904	0.0210701
8	72480641	72492614	11974	-	ENSMUSG00000019731	Slc35e1	protein_coding	solute carrier family 35, member E1 [Source:MGI Symbol;Acc:MGI:2142403]	270066	0.422892	6.20486	3.20911	0.0020542	0.0229782
8	84249906	84257326	7421	-	ENSMUSG00000004996	Mri1	protein_coding	methylthioribose-1-phosphate isomerase 1 [Source:MGI Symbol;Acc:MGI:1915123]	67873	-0.529292	3.34097	-3.1961	0.00212615	0.0233937
8	79683462	79711740	28279	-	ENSMUSG00000058355	Abce1	protein_coding	ATP-binding cassette, sub-family E (OABP), member 1 [Source:MGI Symbol;Acc:MGI:1195458]	24015	0.358881	6.22539	3.18025	0.00219667	0.0238442
8	88521354	88594884	73531	+	ENSMUSG00000031661	Nkd1	protein_coding	naked cuticle 1 [Source:MGI Symbol;Acc:MGI:2135954]	93960	-0.830317	2.53959	-3.152	0.00246305	0.0256576
8	64592542	64693054	100513	-	ENSMUSG00000037852	Cpe	protein_coding	carboxypeptidase E [Source:MGI Symbol;Acc:MGI:101932]	12876	-1.31623	7.31021	-3.16731	0.00265269	0.0268885
8	45507788	45827906	320119	+	ENSMUSG00000031626	Sorbs2	protein_coding	sorbin and SH3 domain containing 2 [Source:MGI Symbol;Acc:MGI:1924574]	234214	-0.961565	5.95896	-3.1229	0.00271893	0.0272257
8	84969587	84974834	5248	+	ENSMUSG00000005161	Prdx2	protein_coding	peroxiredoxin 2 [Source:MGI Symbol;Acc:MGI:109486]	21672	-0.565453	6.14958	-3.05797	0.00294613	0.0289435
8	71497765	71511752	13988	-	ENSMUSG00000034845	Plvap	protein_coding	plasmalemma vesicle associated protein [Source:MGI Symbol;Acc:MGI:1890497]	84094	-1.11347	7.24255	-3.0905	0.00304801	0.0297157
8	121084386	121088144	3759	+	ENSMUSG00000042812	Foxf1	protein_coding	forkhead box F1 [Source:MGI Symbol;Acc:MGI:1347470]	15227	-0.871847	2.40863	-3.04327	0.00322012	0.0306903
8	119344488	119348922	4435	+	ENSMUSG00000031839	Hsbp1	protein_coding	heat shock factor binding protein 1 [Source:MGI Symbol;Acc:MGI:1915446]	68196	-0.451101	7.14553	-3.0092	0.00327448	0.0310731
8	78505269	78508898	3630	-	ENSMUSG00000037070	Rbmxl1	protein_coding	RNA binding motif protein, X-linked like-1 [Source:MGI Symbol;Acc:MGI:1343045]	19656	0.355449	3.31544	2.98925	0.00342285	0.0319501
8	94434356	94527272	92917	+	ENSMUSG00000074151	Nlrc5	protein_coding	NLR family, CARD domain containing 5 [Source:MGI Symbol;Acc:MGI:3612191]	434341	0.967302	1.73361	2.98273	0.00380642	0.034108
8	27085583	27123436	37854	+	ENSMUSG00000031486	Adgra2	protein_coding	adhesion G protein-coupled receptor A2 [Source:MGI Symbol;Acc:MGI:1925810]	78560	-0.925305	4.78706	-2.96525	0.0039264	0.034741
8	47632329	47632764	436	-	ENSMUSG00000062458	Gm8623	processed_pseudogene	predicted gene 8623 [Source:MGI Symbol;Acc:MGI:3644689]	NA	-1.0337	-0.905014	-2.96676	0.00402135	0.0352957
8	41191434	41215156	23723	-	ENSMUSG00000031594	Fgl1	protein_coding	fibrinogen-like protein 1 [Source:MGI Symbol;Acc:MGI:102795]	234199	0.999721	-0.309262	2.95861	0.00406488	0.0355555
8	122454208	122460733	6526	-	ENSMUSG00000006587	Snai3	protein_coding	snail family zinc finger 3 [Source:MGI Symbol;Acc:MGI:1353563]	30927	1.20056	-0.617573	2.96672	0.00419319	0.0363862
8	24437180	24438984	1805	-	ENSMUSG00000056313	Tcim	protein_coding	transcriptional and immune response regulator [Source:MGI Symbol;Acc:MGI:1916318]	69068	-0.920776	2.19121	-2.9288	0.00427602	0.0368343
8	13757676	13781938	24263	+	ENSMUSG00000038416	Cdc16	protein_coding	CDC16 cell division cycle 16 [Source:MGI Symbol;Acc:MGI:1917207]	69957	0.381535	5.71125	2.89164	0.0042827	0.0368712
8	69088646	69113711	25066	+	ENSMUSG00000006273	Atp6v1b2	protein_coding	ATPase, H+ transporting, lysosomal V1 subunit B2 [Source:MGI Symbol;Acc:MGI:109618]	11966	-0.39162	6.91054	-2.8885	0.00431421	0.0371008
8	13465374	13494490	29117	-	ENSMUSG00000031451	Gas6	protein_coding	growth arrest specific 6 [Source:MGI Symbol;Acc:MGI:95660]	14456	-0.88871	3.62281	-2.9143	0.00438926	0.0374935
8	105276140	105281939	5800	+	ENSMUSG00000014776	Nol3	protein_coding	nucleolar protein 3 (apoptosis repressor with CARD domain) [Source:MGI Symbol;Acc:MGI:1925938]	78688	-1.35751	-0.81742	-2.9525	0.00450226	0.0382154
8	125751508	125898317	146810	-	ENSMUSG00000060212	Pcnx2	protein_coding	pecanex homolog 2 [Source:MGI Symbol;Acc:MGI:2445010]	270109	1.54503	-0.522247	2.95437	0.00466493	0.039064
8	123186242	123201812	15571	+	ENSMUSG00000019278	Dpep1	protein_coding	dipeptidase 1 [Source:MGI Symbol;Acc:MGI:94917]	13479	-0.874292	2.55225	-2.87631	0.00478302	0.0396809
8	69887788	69902712	14925	-	ENSMUSG00000048967	Yjefn3	protein_coding	YjeF N-terminal domain containing 3 [Source:MGI Symbol;Acc:MGI:2681845]	234365	0.911704	-0.409885	2.86843	0.00492047	0.0403005
8	69741639	69749970	8332	-	ENSMUSG00000092260	Zfp963	protein_coding	zinc finger protein 963 [Source:MGI Symbol;Acc:MGI:4867078]	620419	0.69417	0.661505	2.84501	0.00492928	0.0403511
8	61223872	61396071	172200	+	ENSMUSG00000031642	Sh3rf1	protein_coding	SH3 domain containing ring finger 1 [Source:MGI Symbol;Acc:MGI:1913066]	59009	-0.449484	3.29034	-2.82353	0.00501108	0.040846
8	45336717	45382291	45575	-	ENSMUSG00000070044	Fam149a	protein_coding	family with sequence similarity 149, member A [Source:MGI Symbol;Acc:MGI:2387177]	212326	-0.64389	2.97955	-2.82957	0.00505763	0.0410725
8	11477929	11480241	2313	+	ENSMUSG00000096957	E230013L22Rik	bidirectional_promoter_lncRNA	RIKEN cDNA E230013L22 gene [Source:MGI Symbol;Acc:MGI:2142601]	NA	-1.02717	-0.484527	-2.86561	0.00510726	0.0413003
8	105935735	105938444	2710	-	ENSMUSG00000031897	Psmb10	protein_coding	proteasome (prosome, macropain) subunit, beta type 10 [Source:MGI Symbol;Acc:MGI:1096380]	19171	-0.55104	2.32231	-2.81839	0.00511443	0.0413364
8	105518755	105523988	5234	+	ENSMUSG00000031891	Hsd11b2	protein_coding	hydroxysteroid 11-beta dehydrogenase 2 [Source:MGI Symbol;Acc:MGI:104720]	15484	1.15203	1.29602	2.85286	0.00543911	0.0432082
8	123229801	123236233	6433	-	ENSMUSG00000033594	Spata2l	protein_coding	spermatogenesis associated 2-like [Source:MGI Symbol;Acc:MGI:1926029]	78779	0.867224	3.45842	2.80065	0.00570251	0.0446979
8	87460469	87525554	65086	+	ENSMUSG00000097248	Gm2694	lincRNA	predicted gene 2694 [Source:MGI Symbol;Acc:MGI:3780864]	NA	1.26294	-1.11353	2.83057	0.00589731	0.0455265
8	122424776	122432930	8155	-	ENSMUSG00000006519	Cyba	protein_coding	cytochrome b-245, alpha polypeptide [Source:MGI Symbol;Acc:MGI:1316658]	13057	-1.02663	4.24463	-2.77871	0.00627236	0.047428
8	71554238	71558871	4634	-	ENSMUSG00000043664	Tmem221	protein_coding	transmembrane protein 221 [Source:MGI Symbol;Acc:MGI:3525074]	434325	-1.56032	-1.44919	-2.83202	0.00627687	0.047428
7	28692849	28699338	6490	+	ENSMUSG00000037463	Fbxo27	protein_coding	F-box protein 27 [Source:MGI Symbol;Acc:MGI:2685007]	233040	1.0331	4.89736	7.95726	3.68207e-08	0.000174528
7	118972047	118995211	23165	-	ENSMUSG00000008734	Gprc5b	protein_coding	G protein-coupled receptor, family C, group 5, member B [Source:MGI Symbol;Acc:MGI:1927596]	64297	-1.60594	3.64845	-6.57382	7.60417e-07	0.000485273
7	125552120	125579474	27355	+	ENSMUSG00000030748	Il4ra	protein_coding	interleukin 4 receptor, alpha [Source:MGI Symbol;Acc:MGI:105367]	16190	-1.47207	4.93992	-6.48103	9.23619e-07	0.000500826
7	65861734	66050386	188653	+	ENSMUSG00000030513	Pcsk6	protein_coding	proprotein convertase subtilisin/kexin type 6 [Source:MGI Symbol;Acc:MGI:102897]	18553	1.78007	4.4211	6.45934	1.00541e-06	0.000500826
7	118597297	118675086	77790	+	ENSMUSG00000030650	Tmc5	protein_coding	transmembrane channel-like gene family 5 [Source:MGI Symbol;Acc:MGI:1921674]	74424	1.18339	5.00001	5.97689	2.84605e-06	0.000706661
7	4940512	4964406	23895	-	ENSMUSG00000030433	Sbk2	protein_coding	SH3-binding domain kinase family, member 2 [Source:MGI Symbol;Acc:MGI:2685925]	381836	-1.25102	0.54338	-5.97749	2.86121e-06	0.000706661
7	25379527	25398710	19184	-	ENSMUSG00000003123	Lipe	protein_coding	lipase, hormone sensitive [Source:MGI Symbol;Acc:MGI:96790]	16890	-1.71856	2.48742	-5.79125	4.67728e-06	0.000824241
7	100706635	100841656	135022	+	ENSMUSG00000029461	Fam168a	protein_coding	family with sequence similarity 168, member A [Source:MGI Symbol;Acc:MGI:2442372]	319604	0.692179	6.07137	5.60879	6.52159e-06	0.00093991
7	100869752	100932107	62356	-	ENSMUSG00000032875	Arhgef17	protein_coding	Rho guanine nucleotide exchange factor (GEF) 17 [Source:MGI Symbol;Acc:MGI:2673002]	207212	-0.684378	5.83203	-5.58715	6.86078e-06	0.000946664
7	127132232	127137823	5592	-	ENSMUSG00000051457	Spn	protein_coding	sialophorin [Source:MGI Symbol;Acc:MGI:98384]	20737	1.01855	4.29261	5.56337	7.38432e-06	0.000983463
7	66390890	66427517	36628	-	ENSMUSG00000015134	Aldh1a3	protein_coding	aldehyde dehydrogenase family 1, subfamily A3 [Source:MGI Symbol;Acc:MGI:1861722]	56847	2.83752	5.95752	5.64237	7.60422e-06	0.00098612
7	141455198	141460743	5546	+	ENSMUSG00000025509	Pnpla2	protein_coding	patatin-like phospholipase domain containing 2 [Source:MGI Symbol;Acc:MGI:1914103]	66853	-0.67867	5.6439	-5.35165	1.19673e-05	0.00131864
7	79821803	79861059	39257	-	ENSMUSG00000039062	Anpep	protein_coding	alanyl (membrane) aminopeptidase [Source:MGI Symbol;Acc:MGI:5000466]	16790	-1.37478	6.92977	-5.31515	1.38637e-05	0.00143471
7	16721929	16726132	4204	+	ENSMUSG00000007209	Ceacam9	protein_coding	carcinoembryonic antigen-related cell adhesion molecule 9 [Source:MGI Symbol;Acc:MGI:1347247]	26368	2.31065	1.24402	5.36372	1.39745e-05	0.00143647
7	127607031	127615797	8767	-	ENSMUSG00000045639	Zfp629	protein_coding	zinc finger protein 629 [Source:MGI Symbol;Acc:MGI:2444524]	320683	-0.983836	1.83273	-5.26551	1.49413e-05	0.00146693
7	99267447	99337137	69691	+	ENSMUSG00000055407	Map6	protein_coding	microtubule-associated protein 6 [Source:MGI Symbol;Acc:MGI:1201690]	17760	-0.870285	4.94334	-5.2365	1.5876e-05	0.00149811
7	130936111	130985660	49550	+	ENSMUSG00000006205	Htra1	protein_coding	HtrA serine peptidase 1 [Source:MGI Symbol;Acc:MGI:1929076]	56213	-1.05342	8.3844	-5.15797	1.94586e-05	0.00168377
7	46033698	46084212	50515	+	ENSMUSG00000030835	Nomo1	protein_coding	nodal modulator 1 [Source:MGI Symbol;Acc:MGI:2385850]	211548	0.616311	7.57578	5.10554	2.14881e-05	0.00171117
7	48866429	48881596	15168	-	ENSMUSG00000046179	E2f8	protein_coding	E2F transcription factor 8 [Source:MGI Symbol;Acc:MGI:1922038]	108961	1.01462	5.15657	5.06668	2.41409e-05	0.00181622
7	19716644	19750483	33840	-	ENSMUSG00000062300	Nectin2	protein_coding	nectin cell adhesion molecule 2 [Source:MGI Symbol;Acc:MGI:97822]	19294	0.675695	8.10185	5.04457	2.49024e-05	0.00181622
7	142966829	142969264	2436	-	ENSMUSG00000009248	Ascl2	protein_coding	achaete-scute family bHLH transcription factor 2 [Source:MGI Symbol;Acc:MGI:96920]	17173	2.46023	1.76669	5.05984	2.9722e-05	0.00200983
7	100006172	100034728	28557	+	ENSMUSG00000030732	Chrdl2	protein_coding	chordin-like 2 [Source:MGI Symbol;Acc:MGI:1916371]	69121	2.9426	1.89429	5.0623	3.11176e-05	0.00206881
7	123462291	123468004	5714	+	ENSMUSG00000030762	Aqp8	protein_coding	aquaporin 8 [Source:MGI Symbol;Acc:MGI:1195271]	11833	-1.37823	5.8941	-4.92385	3.57003e-05	0.00218814
7	141475240	141493427	18188	+	ENSMUSG00000025511	Tspan4	protein_coding	tetraspanin 4 [Source:MGI Symbol;Acc:MGI:1928097]	64540	-1.11051	4.07656	-4.88704	3.76595e-05	0.0022531
7	89507783	89527187	19405	-	ENSMUSG00000039405	Prss23	protein_coding	protease, serine 23 [Source:MGI Symbol;Acc:MGI:1923703]	76453	-1.49728	3.54661	-4.82167	4.6613e-05	0.00254066
7	143052739	143067934	15196	+	ENSMUSG00000037706	Cd81	protein_coding	CD81 antigen [Source:MGI Symbol;Acc:MGI:1096398]	12520	-1.05801	5.63818	-4.78036	4.84863e-05	0.00261485
7	16648949	16657476	8528	-	ENSMUSG00000108307	Ceacam-ps1	transcribed_unprocessed_pseudogene	carcinoembryonic antigen-related cell adhesion molecule pseudogene 1 [Source:MGI Symbol;Acc:MGI:3610557]	NA	-3.76074	4.53185	-4.88785	5.10573e-05	0.00265984
7	45302632	45333780	31149	-	ENSMUSG00000038260	Trpm4	protein_coding	transient receptor potential cation channel, subfamily M, member 4 [Source:MGI Symbol;Acc:MGI:1915917]	68667	-0.726296	2.67821	-4.66964	6.16083e-05	0.00293041
7	98489283	98502181	12899	+	ENSMUSG00000090958	Lrrc32	protein_coding	leucine rich repeat containing 32 [Source:MGI Symbol;Acc:MGI:93882]	434215	-0.952601	4.56894	-4.65173	6.55079e-05	0.0030496
7	126584942	126589112	4171	+	ENSMUSG00000042759	Apobr	protein_coding	apolipoprotein B receptor [Source:MGI Symbol;Acc:MGI:2176230]	171504	0.621398	6.07703	4.58735	7.48826e-05	0.00336335
7	139894696	139941537	46842	+	ENSMUSG00000066129	Kndc1	protein_coding	kinase non-catalytic C-lobe domain (KIND) containing 1 [Source:MGI Symbol;Acc:MGI:1923734]	76484	1.04852	0.420183	4.55911	8.30233e-05	0.00357187
7	16647383	16647789	407	-	ENSMUSG00000108610	Gm29725	processed_pseudogene	predicted gene, 29725 [Source:MGI Symbol;Acc:MGI:5588884]	NA	-3.33507	-0.2379	-4.61548	9.66048e-05	0.00395615
7	126623249	126630861	7613	-	ENSMUSG00000030717	Nupr1	protein_coding	nuclear protein transcription regulator 1 [Source:MGI Symbol;Acc:MGI:1891834]	56312	-0.808273	3.49466	-4.48333	9.73466e-05	0.00395697
7	126759601	126765819	6219	+	ENSMUSG00000063065	Mapk3	protein_coding	mitogen-activated protein kinase 3 [Source:MGI Symbol;Acc:MGI:1346859]	26417	-0.817963	6.12649	-4.44463	0.000107042	0.00416107
7	17150282	17164253	13972	+	ENSMUSG00000053228	Ceacam3	protein_coding	carcinoembryonic antigen-related cell adhesion molecule 3 [Source:MGI Symbol;Acc:MGI:3646296]	384557	0.782027	10.6439	4.33598	0.000139036	0.00474923
7	29320372	29518641	198270	-	ENSMUSG00000030583	Sipa1l3	protein_coding	signal-induced proliferation-associated 1 like 3 [Source:MGI Symbol;Acc:MGI:1921456]	74206	0.778372	6.16847	4.32882	0.000141439	0.00479266
7	143688762	143756985	68224	-	ENSMUSG00000037606	Osbpl5	protein_coding	oxysterol binding protein-like 5 [Source:MGI Symbol;Acc:MGI:1930265]	79196	-1.02257	5.60701	-4.29138	0.000159277	0.00514658
7	18718090	18727248	9159	+	ENSMUSG00000044903	Psg22	protein_coding	pregnancy-specific glycoprotein 22 [Source:MGI Symbol;Acc:MGI:1891354]	243862	-1.09493	8.08557	-4.28267	0.000164429	0.00520151
7	4784557	4789656	5100	-	ENSMUSG00000030431	Tmem238	protein_coding	transmembrane protein 238 [Source:MGI Symbol;Acc:MGI:1922935]	664968	-1.64256	-0.496692	-4.26467	0.000188111	0.00565475
7	117380979	117673580	292602	+	ENSMUSG00000030657	Xylt1	protein_coding	xylosyltransferase 1 [Source:MGI Symbol;Acc:MGI:2451073]	233781	0.781535	7.35456	4.19746	0.000194812	0.00577125
7	24969752	24972754	3003	-	ENSMUSG00000003380	Rabac1	protein_coding	Rab acceptor 1 (prenylated) [Source:MGI Symbol;Acc:MGI:1201692]	14470	-0.500681	6.7638	-4.1687	0.000206137	0.00597953
7	29134851	29153961	19111	+	ENSMUSG00000030589	Rasgrp4	protein_coding	RAS guanyl releasing protein 4 [Source:MGI Symbol;Acc:MGI:2386851]	233046	1.23342	1.29669	4.12799	0.000246023	0.00651919
7	101263034	101302251	39218	-	ENSMUSG00000047767	Atg16l2	protein_coding	autophagy related 16-like 2 (S. cerevisiae) [Source:MGI Symbol;Acc:MGI:1920933]	73683	-0.522878	3.05123	-4.08277	0.00025396	0.00660383
7	68273839	68363092	89254	+	ENSMUSG00000074071	Fam169b	protein_coding	family with sequence similarity 169, member B [Source:MGI Symbol;Acc:MGI:3644026]	434197	-1.01608	2.23383	-4.09596	0.000256922	0.00664698
7	55931287	55962476	31190	-	ENSMUSG00000030452	Nipa2	protein_coding	non imprinted in Prader-Willi/Angelman syndrome 2 homolog (human) [Source:MGI Symbol;Acc:MGI:1913918]	93790	0.413788	4.67406	4.07516	0.000258423	0.00665491
7	45918023	45921404	3382	-	ENSMUSG00000040212	Emp3	protein_coding	epithelial membrane protein 3 [Source:MGI Symbol;Acc:MGI:1098729]	13732	-1.30644	3.90333	-4.09691	0.000269026	0.00678173
7	81881251	81934473	53223	-	ENSMUSG00000025104	Hdgfl3	protein_coding	HDGF like 3 [Source:MGI Symbol;Acc:MGI:1352760]	29877	-1.13346	1.64957	-4.06774	0.000280586	0.00697639
7	80377756	80387946	10191	-	ENSMUSG00000053158	Fes	protein_coding	feline sarcoma oncogene [Source:MGI Symbol;Acc:MGI:95514]	14159	-0.821491	2.09241	-4.03983	0.000287194	0.00704274
7	28267881	28269272	1392	+	ENSMUSG00000046058	Eid2	protein_coding	EP300 interacting inhibitor of differentiation 2 [Source:MGI Symbol;Acc:MGI:2681174]	386655	-0.825955	1.80577	-4.02293	0.000299423	0.00724481
7	139389109	139579652	190544	+	ENSMUSG00000025477	Inpp5a	protein_coding	inositol polyphosphate-5-phosphatase A [Source:MGI Symbol;Acc:MGI:2686961]	212111	-0.652742	5.17549	-4.01156	0.000303252	0.00730285
7	103826534	103828096	1563	-	ENSMUSG00000052305	Hbb-bs	protein_coding	hemoglobin, beta adult s chain [Source:MGI Symbol;Acc:MGI:5474852]	c(15129, 100503605)	-1.91388	12.8248	-4.05413	0.000331355	0.00774256
7	133686243	133710072	23830	-	ENSMUSG00000030979	Uros	protein_coding	uroporphyrinogen III synthase [Source:MGI Symbol;Acc:MGI:98917]	22276	0.56454	3.43993	3.95731	0.000344507	0.00795072
7	16234585	16244154	9570	-	ENSMUSG00000074361	C5ar2	protein_coding	complement component 5a receptor 2 [Source:MGI Symbol;Acc:MGI:2442013]	319430	1.76663	2.69125	4.01956	0.000352788	0.00803039
7	79660196	79698148	37953	+	ENSMUSG00000046591	Ticrr	protein_coding	TOPBP1-interacting checkpoint and replication regulator [Source:MGI Symbol;Acc:MGI:1924261]	77011	-0.908615	4.44108	-3.95598	0.000356301	0.00806071
7	66226912	66388350	161439	-	ENSMUSG00000015133	Lrrk1	protein_coding	leucine-rich repeat kinase 1 [Source:MGI Symbol;Acc:MGI:2142227]	233328	-0.737671	3.46934	-3.90075	0.000399419	0.00861934
7	114415281	114539251	123971	+	ENSMUSG00000030671	Pde3b	protein_coding	phosphodiesterase 3B, cGMP-inhibited [Source:MGI Symbol;Acc:MGI:1333863]	18576	-1.00006	0.857514	-3.89452	0.000419931	0.00885905
7	140941391	140947664	6274	+	ENSMUSG00000062031	Pgghg	protein_coding	protein glucosylgalactosylhydroxylysine glucosidase [Source:MGI Symbol;Acc:MGI:2444047]	212974	-1.04422	1.89271	-3.88629	0.000431665	0.00902199
7	125878420	126082411	203992	-	ENSMUSG00000046182	Gsg1l	protein_coding	GSG1-like [Source:MGI Symbol;Acc:MGI:2685483]	269994	2.00536	2.77947	3.93714	0.000449457	0.00926498
7	30291728	30308367	16640	+	ENSMUSG00000013921	Clip3	protein_coding	CAP-GLY domain containing linker protein 3 [Source:MGI Symbol;Acc:MGI:1923936]	76686	-1.08025	2.94427	-3.86504	0.000457633	0.00939559
7	79115102	79131018	15917	-	ENSMUSG00000030606	Hapln3	protein_coding	hyaluronan and proteoglycan link protein 3 [Source:MGI Symbol;Acc:MGI:1914916]	67666	0.96734	2.66981	3.84469	0.000471903	0.0094727
7	103812524	103813996	1473	-	ENSMUSG00000073940	Hbb-bt	protein_coding	hemoglobin, beta adult t chain [Source:MGI Symbol;Acc:MGI:5474850]	101488143	-1.76163	8.06252	-3.89166	0.000484407	0.00964782
7	110768206	110812405	44200	+	ENSMUSG00000005686	Ampd3	protein_coding	adenosine monophosphate deaminase 3 [Source:MGI Symbol;Acc:MGI:1096344]	11717	-1.31602	5.75958	-3.85844	0.000485759	0.00965538
7	144588549	144751974	163426	-	ENSMUSG00000031075	Ano1	protein_coding	anoctamin 1, calcium activated chloride channel [Source:MGI Symbol;Acc:MGI:2142149]	101772	-1.08714	5.22503	-3.83849	0.000489057	0.00967751
7	18345422	18355009	9588	-	ENSMUSG00000003505	Psg18	protein_coding	pregnancy specific glycoprotein 18 [Source:MGI Symbol;Acc:MGI:1347251]	26438	0.730302	11.7354	3.79637	0.000514193	0.0100323
7	98051060	98119524	68465	-	ENSMUSG00000030761	Myo7a	protein_coding	myosin VIIA [Source:MGI Symbol;Acc:MGI:104510]	17921	-0.683865	4.51957	-3.7886	0.000521745	0.0101065
7	128246812	128255699	8888	+	ENSMUSG00000030782	Tgfb1i1	protein_coding	transforming growth factor beta 1 induced transcript 1 [Source:MGI Symbol;Acc:MGI:102784]	21804	-1.03698	4.31125	-3.79862	0.000534528	0.0102208
7	101092863	101284405	191543	+	ENSMUSG00000030691	Fchsd2	protein_coding	FCH and double SH3 domains 2 [Source:MGI Symbol;Acc:MGI:2448475]	207278	0.45631	5.18335	3.71282	0.000620081	0.0110948
7	46711998	46715700	3703	-	ENSMUSG00000040026	Saa3	protein_coding	serum amyloid A 3 [Source:MGI Symbol;Acc:MGI:98223]	20210	-2.89191	-1.69607	-3.83729	0.000640979	0.0113124
7	143763710	143766993	3284	-	ENSMUSG00000050276	Mrgprg	protein_coding	MAS-related GPR, member G [Source:MGI Symbol;Acc:MGI:3033145]	381974	-1.70492	5.29384	-3.77076	0.000647838	0.0113788
7	67730160	67759742	29583	-	ENSMUSG00000030554	Synm	protein_coding	synemin, intermediate filament protein [Source:MGI Symbol;Acc:MGI:2661187]	233335	1.24746	0.508749	3.7207	0.000673495	0.0116953
7	18519702	18532269	12568	-	ENSMUSG00000070798	Psg25	protein_coding	pregnancy-specific glycoprotein 25 [Source:MGI Symbol;Acc:MGI:1891357]	114868	0.655581	11.3169	3.66791	0.000696764	0.0118838
7	74275419	74554780	279362	-	ENSMUSG00000025790	Slco3a1	protein_coding	solute carrier organic anion transporter family, member 3a1 [Source:MGI Symbol;Acc:MGI:1351867]	108116	0.685436	4.73077	3.6648	0.000703849	0.0119779
7	62346569	62350262	3694	+	ENSMUSG00000033585	Ndn	protein_coding	necdin [Source:MGI Symbol;Acc:MGI:97290]	17984	-0.809346	3.8386	-3.66294	0.000717378	0.0120608
7	102441695	102469771	28077	+	ENSMUSG00000030978	Rrm1	protein_coding	ribonucleotide reductase M1 [Source:MGI Symbol;Acc:MGI:98180]	20133	-0.676852	6.04027	-3.64847	0.000731541	0.0121786
7	105744811	105752235	7425	-	ENSMUSG00000030894	Tpp1	protein_coding	tripeptidyl peptidase I [Source:MGI Symbol;Acc:MGI:1336194]	12751	-0.532127	7.90564	-3.62516	0.000766738	0.0124813
7	68236610	68264233	27624	-	ENSMUSG00000030553	Pgpep1l	protein_coding	pyroglutamyl-peptidase I-like [Source:MGI Symbol;Acc:MGI:1925694]	78444	-1.14601	-0.00328268	-3.6355	0.000814061	0.0128856
7	29174188	29180701	6514	-	ENSMUSG00000030591	Psmd8	protein_coding	proteasome (prosome, macropain) 26S subunit, non-ATPase, 8 [Source:MGI Symbol;Acc:MGI:1888669]	57296	-0.441651	7.74978	-3.55694	0.000901004	0.0135035
7	143513579	143549106	35528	-	ENSMUSG00000059119	Nap1l4	protein_coding	nucleosome assembly protein 1-like 4 [Source:MGI Symbol;Acc:MGI:1316687]	17955	0.349806	6.22333	3.53519	0.000948617	0.0139971
7	141493136	141539857	46722	-	ENSMUSG00000025512	Chid1	protein_coding	chitinase domain containing 1 [Source:MGI Symbol;Acc:MGI:1915288]	68038	0.39838	6.21848	3.53133	0.000957524	0.0141014
7	30751471	30756134	4664	+	ENSMUSG00000046056	Sbsn	protein_coding	suprabasin [Source:MGI Symbol;Acc:MGI:2446326]	282619	0.739141	7.78092	3.53591	0.000966147	0.0141874
7	18549085	18549191	107	+	ENSMUSG00000065313	Gm26062	snRNA	predicted gene, 26062 [Source:MGI Symbol;Acc:MGI:5455839]	NA	1.10228	0.549697	3.56127	0.000967994	0.014201
7	143634806	143649661	14856	-	ENSMUSG00000010751	Tnfrsf22	protein_coding	tumor necrosis factor receptor superfamily, member 22 [Source:MGI Symbol;Acc:MGI:1930270]	79202	-1.03536	3.22429	-3.55107	0.000979256	0.0142901
7	25757273	25788705	31433	-	ENSMUSG00000002602	Axl	protein_coding	AXL receptor tyrosine kinase [Source:MGI Symbol;Acc:MGI:1347244]	26362	-0.85718	5.92342	-3.52393	0.00101213	0.0146546
7	16671331	16675705	4375	-	ENSMUSG00000078795	Ceacam15	protein_coding	carcinoembryonic antigen-related cell adhesion molecule 15 [Source:MGI Symbol;Acc:MGI:2141810]	101434	-1.13569	6.79998	-3.52679	0.00106044	0.0150401
7	4424770	4445649	20880	-	ENSMUSG00000008435	Rdh13	protein_coding	retinol dehydrogenase 13 (all-trans and 9-cis) [Source:MGI Symbol;Acc:MGI:1918732]	108841	0.681732	3.72057	3.46611	0.00113482	0.0156867
7	27532000	27553218	21219	-	ENSMUSG00000003363	Pld3	protein_coding	phospholipase D family, member 3 [Source:MGI Symbol;Acc:MGI:1333782]	18807	-0.380671	7.8466	-3.4428	0.00118232	0.0161106
7	80349097	80371375	22279	-	ENSMUSG00000038886	Man2a2	protein_coding	mannosidase 2, alpha 2 [Source:MGI Symbol;Acc:MGI:2150656]	140481	-0.683001	4.09381	-3.44061	0.00120651	0.0162667
7	127382260	127387166	4907	-	ENSMUSG00000030823	9130019O22Rik	protein_coding	RIKEN cDNA 9130019O22 gene [Source:MGI Symbol;Acc:MGI:1926171]	78921	-0.828375	0.48668	-3.44248	0.0012264	0.016448
7	113765998	114043370	277373	+	ENSMUSG00000038156	Spon1	protein_coding	spondin 1, (f-spondin) extracellular matrix protein [Source:MGI Symbol;Acc:MGI:2385287]	233744	-1.55987	5.16946	-3.48223	0.001289	0.0169025
7	89404355	89413134	8780	+	ENSMUSG00000049791	Fzd4	protein_coding	frizzled class receptor 4 [Source:MGI Symbol;Acc:MGI:108520]	14366	-0.936859	3.20776	-3.39512	0.00140308	0.0179229
7	127214447	127233130	18684	-	ENSMUSG00000000486	Septin1	protein_coding	septin 1 [Source:MGI Symbol;Acc:MGI:1858916]	54204	-0.847205	0.55727	-3.37981	0.00143117	0.0181155
7	112116017	112159057	43041	-	ENSMUSG00000030772	Dkk3	protein_coding	dickkopf WNT signaling pathway inhibitor 3 [Source:MGI Symbol;Acc:MGI:1354952]	50781	-0.752246	3.87374	-3.345	0.00153117	0.0191128
7	19176421	19206482	30062	+	ENSMUSG00000040811	Eml2	protein_coding	echinoderm microtubule associated protein like 2 [Source:MGI Symbol;Acc:MGI:1919455]	72205	0.490988	5.04236	3.32408	0.00156951	0.0194297
7	133883199	134232146	348948	-	ENSMUSG00000054555	Adam12	protein_coding	a disintegrin and metallopeptidase domain 12 (meltrin alpha) [Source:MGI Symbol;Acc:MGI:105378]	11489	-0.96494	4.00157	-3.34594	0.00158958	0.0195394
7	34639014	34656732	17719	-	ENSMUSG00000030499	Kctd15	protein_coding	potassium channel tetramerisation domain containing 15 [Source:MGI Symbol;Acc:MGI:2385276]	233107	0.540208	4.94117	3.3041	0.0016492	0.019862
7	139834174	139878088	43915	+	ENSMUSG00000025475	Adgra1	protein_coding	adhesion G protein-coupled receptor A1 [Source:MGI Symbol;Acc:MGI:1277167]	52389	-1.77518	-1.20093	-3.37547	0.00174336	0.0206188
7	5051538	5053723	2186	+	ENSMUSG00000055633	Zfp580	protein_coding	zinc finger protein 580 [Source:MGI Symbol;Acc:MGI:1916242]	68992	-0.895523	1.04498	-3.29535	0.0017705	0.0208112
7	44302687	44306902	4216	-	ENSMUSG00000004473	Clec11a	protein_coding	C-type lectin domain family 11, member a [Source:MGI Symbol;Acc:MGI:1298219]	20256	-1.16304	-0.698476	-3.30839	0.00181838	0.0211468
7	45705088	45710203	5116	+	ENSMUSG00000059824	Dbp	protein_coding	D site albumin promoter binding protein [Source:MGI Symbol;Acc:MGI:94866]	13170	-0.965311	0.576837	-3.27888	0.0018695	0.0216117
7	43408204	43418358	10155	+	ENSMUSG00000030468	Siglecg	protein_coding	sialic acid binding Ig-like lectin G [Source:MGI Symbol;Acc:MGI:2443630]	243958	-1.08901	1.37684	-3.28674	0.0018852	0.0217273
7	139978932	139992562	13631	-	ENSMUSG00000025473	Adam8	protein_coding	a disintegrin and metallopeptidase domain 8 [Source:MGI Symbol;Acc:MGI:107825]	11501	1.22781	3.00273	3.29946	0.00188532	0.0217273
7	45627488	45639093	11606	+	ENSMUSG00000044562	Rasip1	protein_coding	Ras interacting protein 1 [Source:MGI Symbol;Acc:MGI:1917153]	69903	-0.976545	2.02662	-3.2632	0.00194641	0.0221644
7	89632392	89854359	221968	+	ENSMUSG00000030621	Me3	protein_coding	malic enzyme 3, NADP(+)-dependent, mitochondrial [Source:MGI Symbol;Acc:MGI:1916679]	109264	-1.35321	-1.05559	-3.27702	0.00204662	0.0229642
7	84109356	84151893	42538	-	ENSMUSG00000038459	Abhd17c	protein_coding	abhydrolase domain containing 17C [Source:MGI Symbol;Acc:MGI:1917428]	70178	-0.653472	5.07899	-3.20787	0.00209253	0.0231683
7	140967221	140969825	2605	+	ENSMUSG00000025491	Ifitm1	protein_coding	interferon induced transmembrane protein 1 [Source:MGI Symbol;Acc:MGI:1915963]	68713	-1.31037	1.03555	-3.25529	0.0021383	0.0234432
7	143665809	143685872	20064	-	ENSMUSG00000037613	Tnfrsf23	protein_coding	tumor necrosis factor receptor superfamily, member 23 [Source:MGI Symbol;Acc:MGI:1930269]	79201	-0.784911	8.28842	-3.19701	0.00219272	0.0238351
7	110868266	110982461	114196	-	ENSMUSG00000005611	Mrvi1	protein_coding	MRV integration site 1 [Source:MGI Symbol;Acc:MGI:1338023]	17540	-0.933786	2.1013	-3.19642	0.00226458	0.0243228
7	126248862	126295016	46155	+	ENSMUSG00000042978	Sbk1	protein_coding	SH3-binding kinase 1 [Source:MGI Symbol;Acc:MGI:2135937]	104175	-1.03566	2.58495	-3.19102	0.00234808	0.0249398
7	25687002	25705077	18076	+	ENSMUSG00000002603	Tgfb1	protein_coding	transforming growth factor, beta 1 [Source:MGI Symbol;Acc:MGI:98725]	21803	-0.704109	6.44389	-3.15964	0.00236268	0.0250082
7	121879363	121981711	102349	-	ENSMUSG00000034951	Cog7	protein_coding	component of oligomeric golgi complex 7 [Source:MGI Symbol;Acc:MGI:2685013]	233824	-0.339608	4.77726	-3.14426	0.00238922	0.0251846
7	141278330	141279133	804	-	ENSMUSG00000038580	Sct	protein_coding	secretin [Source:MGI Symbol;Acc:MGI:99466]	20287	0.462583	9.10968	3.14363	0.00239673	0.0252276
7	42705469	42727017	21549	-	ENSMUSG00000091594	Gm17067	protein_coding	predicted gene 17067 [Source:MGI Symbol;Acc:MGI:4937894]	NA	0.690494	2.15186	3.13536	0.00249685	0.0258915
7	19875742	19887965	12224	-	ENSMUSG00000049848	Ceacam19	protein_coding	carcinoembryonic antigen-related cell adhesion molecule 19 [Source:MGI Symbol;Acc:MGI:2443001]	319930	0.842699	1.82726	3.14575	0.00250654	0.0259393
7	110850607	110863239	12633	-	ENSMUSG00000030787	Lyve1	protein_coding	lymphatic vessel endothelial hyaluronan receptor 1 [Source:MGI Symbol;Acc:MGI:2136348]	114332	-1.05692	5.16944	-3.16459	0.00251515	0.0259933
7	42816829	42867234	50406	-	ENSMUSG00000092225	Gm2381	protein_coding	predicted gene 2381 [Source:MGI Symbol;Acc:MGI:3780549]	NA	1.32199	-0.0257621	3.17835	0.00258571	0.0264252
7	15936183	15946074	9892	-	ENSMUSG00000041560	Nop53	protein_coding	NOP53 ribosome biogenesis factor [Source:MGI Symbol;Acc:MGI:2154441]	68077	-0.375481	6.62144	-3.09259	0.00269516	0.0271216
7	58656166	58829420	173255	+	ENSMUSG00000025324	Atp10a	protein_coding	ATPase, class V, type 10A [Source:MGI Symbol;Acc:MGI:1330809]	11982	0.672381	4.34059	3.08427	0.00280832	0.0278217
7	30121942	30134950	13009	+	ENSMUSG00000074220	Zfp382	protein_coding	zinc finger protein 382 [Source:MGI Symbol;Acc:MGI:3588204]	233060	0.984317	-0.529438	3.08243	0.00301215	0.0294185
7	18786332	18789099	2768	+	ENSMUSG00000109116	Sycp1-ps1	processed_pseudogene	synaptonemal complex protein 1, pseudogene 1 [Source:MGI Symbol;Acc:MGI:1098279]	NA	0.751661	6.10375	3.04834	0.00309967	0.0299902
7	4751792	4753094	1303	-	ENSMUSG00000051811	Cox6b2	protein_coding	cytochrome c oxidase subunit 6B2 [Source:MGI Symbol;Acc:MGI:3044182]	333182	-1.12787	0.385338	-3.0692	0.00321971	0.0306903
7	36698118	36773553	75436	+	ENSMUSG00000021217	Tshz3	protein_coding	teashirt zinc finger family member 3 [Source:MGI Symbol;Acc:MGI:2442819]	243931	-1.03786	2.04996	-3.03259	0.00343901	0.0319805
7	6730578	6967219	236642	+	ENSMUSG00000051527	Usp29	protein_coding	ubiquitin specific peptidase 29 [Source:MGI Symbol;Acc:MGI:1888998]	57775	0.539858	5.25184	2.98107	0.00351391	0.0324016
7	19463331	19496762	33432	+	ENSMUSG00000011263	Exoc3l2	protein_coding	exocyst complex component 3-like 2 [Source:MGI Symbol;Acc:MGI:1921713]	74463	-0.864299	3.17557	-2.99397	0.00361341	0.0330999
7	105604463	105633571	29109	-	ENSMUSG00000036989	Trim3	protein_coding	tripartite motif-containing 3 [Source:MGI Symbol;Acc:MGI:1860040]	55992	-0.476557	4.16264	-2.96334	0.00364416	0.033282
7	17812633	17815663	3031	+	ENSMUSG00000023185	Ceacam14	protein_coding	carcinoembryonic antigen-related cell adhesion molecule 14 [Source:MGI Symbol;Acc:MGI:1914334]	67084	0.762036	12.2587	2.97643	0.00367954	0.0334258
7	66109515	66173798	64284	+	ENSMUSG00000032640	Chsy1	protein_coding	chondroitin sulfate synthase 1 [Source:MGI Symbol;Acc:MGI:2681120]	269941	0.624125	4.28511	2.96396	0.00369337	0.033472
7	65644898	65692091	47194	+	ENSMUSG00000030515	Tarsl2	protein_coding	threonyl-tRNA synthetase-like 2 [Source:MGI Symbol;Acc:MGI:2444486]	272396	-0.899763	-0.567206	-2.98673	0.00370766	0.033542
7	110627661	110629820	2160	+	ENSMUSG00000030790	Adm	protein_coding	adrenomedullin [Source:MGI Symbol;Acc:MGI:108058]	11535	-0.82862	6.4639	-2.97257	0.0037691	0.0339174
7	4925785	4944826	19042	+	ENSMUSG00000035279	Ssc5d	protein_coding	scavenger receptor cysteine rich family, 5 domains [Source:MGI Symbol;Acc:MGI:3606211]	269855	-1.11776	2.94891	-2.99301	0.00385724	0.0343923
7	31051678	31057199	5522	-	ENSMUSG00000036570	Fxyd1	protein_coding	FXYD domain-containing ion transport regulator 1 [Source:MGI Symbol;Acc:MGI:1889273]	56188	-1.1493	0.72454	-2.98663	0.00394748	0.0348671
7	126776955	126780514	3560	+	ENSMUSG00000042675	Ypel3	protein_coding	yippee like 3 [Source:MGI Symbol;Acc:MGI:1913340]	66090	-0.462184	5.74082	-2.90902	0.00412557	0.0358815
7	113513834	113571511	57678	+	ENSMUSG00000030759	Far1	protein_coding	fatty acyl CoA reductase 1 [Source:MGI Symbol;Acc:MGI:1914670]	67420	0.524385	4.7358	2.90263	0.00420478	0.0363862
7	139943789	139945112	1324	+	ENSMUSG00000047751	Utf1	protein_coding	undifferentiated embryonic cell transcription factor 1 [Source:MGI Symbol;Acc:MGI:1276125]	22286	1.45147	-0.223161	2.96956	0.00441097	0.037637
7	105752990	105787654	34665	-	ENSMUSG00000036862	Dchs1	protein_coding	dachsous cadherin related 1 [Source:MGI Symbol;Acc:MGI:2685011]	233651	-0.839351	2.45432	-2.89791	0.00450595	0.0382154
7	18017252	18017352	101	-	ENSMUSG00000093207	Gm22414	miRNA	predicted gene, 22414 [Source:MGI Symbol;Acc:MGI:5452191]	NA	1.04378	0.246158	2.91643	0.00454589	0.0384668
7	143795584	143822849	27266	-	ENSMUSG00000031090	Nadsyn1	protein_coding	NAD synthetase 1 [Source:MGI Symbol;Acc:MGI:1926164]	78914	-0.662777	1.14406	-2.8719	0.00460274	0.0387551
7	105371211	105400054	28844	-	ENSMUSG00000044465	Fam160a2	protein_coding	family with sequence similarity 160, member A2 [Source:MGI Symbol;Acc:MGI:1921599]	74349	0.325069	5.07056	2.77962	0.00551995	0.0435958
7	113315626	113369392	53767	-	ENSMUSG00000038187	Btbd10	protein_coding	BTB (POZ) domain containing 10 [Source:MGI Symbol;Acc:MGI:1916065]	68815	0.403105	4.07103	2.77989	0.00552206	0.0435958
7	132235780	132317228	81449	-	ENSMUSG00000030930	Chst15	protein_coding	carbohydrate sulfotransferase 15 [Source:MGI Symbol;Acc:MGI:1924840]	77590	-0.658743	3.7094	-2.79235	0.00552612	0.0436054
7	6703892	6730431	26540	-	ENSMUSG00000002265	Peg3	protein_coding	paternally expressed 3 [Source:MGI Symbol;Acc:MGI:104748]	18616	0.614632	9.94683	2.78547	0.00556736	0.043863
7	40373302	40469240	95939	-	ENSMUSG00000100650	Gm28807	lincRNA	predicted gene 28807 [Source:MGI Symbol;Acc:MGI:5579513]	NA	2.29043	-2.34417	2.92935	0.00557139	0.0438722
7	3486500	3502624	16125	-	ENSMUSG00000053338	Tarm1	protein_coding	T cell-interacting, activating receptor on myeloid cells 1 [Source:MGI Symbol;Acc:MGI:2442280]	245126	0.701446	1.37563	2.78076	0.00572797	0.0448515
7	128439777	128461717	21941	-	ENSMUSG00000030846	Tial1	protein_coding	Tia1 cytotoxic granule-associated RNA binding protein-like 1 [Source:MGI Symbol;Acc:MGI:107913]	21843	0.380055	4.02864	2.75623	0.00582155	0.0452603
7	30942368	30944032	1665	-	ENSMUSG00000050440	Hamp	protein_coding	hepcidin antimicrobial peptide [Source:MGI Symbol;Acc:MGI:1933533]	84506	1.38051	-0.290579	2.84614	0.005841	0.0452966
7	24370263	24386690	16428	+	ENSMUSG00000054342	Kcnn4	protein_coding	potassium intermediate/small conductance calcium-activated channel, subfamily N, member 4 [Source:MGI Symbol;Acc:MGI:1277957]	16534	-0.897654	3.00545	-2.78657	0.00594266	0.0458067
7	28451980	28468242	16263	+	ENSMUSG00000030600	Lrfn1	protein_coding	leucine rich repeat and fibronectin type III domain containing 1 [Source:MGI Symbol;Acc:MGI:2136810]	80749	0.661816	1.89432	2.76018	0.00595399	0.0458559
7	144914470	144914637	168	+	ENSMUSG00000115783	Bc1	lincRNA	brain cytoplasmic RNA 1 [Source:MGI Symbol;Acc:MGI:104905]	NA	1.23587	2.6699	2.82282	0.00596739	0.0458993
7	4628040	4631422	3383	-	ENSMUSG00000045282	Tmem86b	protein_coding	transmembrane protein 86B [Source:MGI Symbol;Acc:MGI:1915505]	68255	-0.752337	-0.241206	-2.76101	0.00606889	0.0464755
7	45017961	45021647	3687	+	ENSMUSG00000038387	Rras	protein_coding	related RAS viral (r-ras) oncogene [Source:MGI Symbol;Acc:MGI:98179]	20130	-0.426806	6.2962	-2.7324	0.00615057	0.0468434
7	45831883	45878378	46496	-	ENSMUSG00000002771	Grin2d	protein_coding	glutamate receptor, ionotropic, NMDA2D (epsilon 4) [Source:MGI Symbol;Acc:MGI:95823]	14814	-0.758509	0.626985	-2.75406	0.00617699	0.0469745
7	140777229	140787852	10624	-	ENSMUSG00000025480	Syce1	protein_coding	synaptonemal complex central element protein 1 [Source:MGI Symbol;Acc:MGI:1921325]	74075	-1.19837	-0.429293	-2.80177	0.00621523	0.0471717
7	43933740	43939639	5900	+	ENSMUSG00000055193	Klk15	protein_coding	kallikrein related-peptidase 15 [Source:MGI Symbol;Acc:MGI:2447533]	317652	-1.53748	1.06023	-2.82062	0.00642057	0.0481103
7	27497388	27520214	22827	+	ENSMUSG00000053198	Prx	protein_coding	periaxin [Source:MGI Symbol;Acc:MGI:108176]	19153	-0.974093	3.76282	-2.75139	0.00659245	0.0489196
6	83362373	83459084	96712	-	ENSMUSG00000034832	Tet3	protein_coding	tet methylcytosine dioxygenase 3 [Source:MGI Symbol;Acc:MGI:2446229]	194388	1.05471	5.0669	7.74694	5.69758e-08	0.000174528
6	42668002	42710088	42087	-	ENSMUSG00000036667	Tcaf1	protein_coding	TRPM8 channel-associated factor 1 [Source:MGI Symbol;Acc:MGI:1914665]	77574	-0.870281	3.10393	-6.19031	1.70282e-06	0.000579563
6	129342691	129365303	22613	+	ENSMUSG00000053063	Clec12a	protein_coding	C-type lectin domain family 12, member a [Source:MGI Symbol;Acc:MGI:3040968]	232413	2.35013	0.66906	5.74965	5.58723e-06	0.000856545
6	91013068	91116829	103762	-	ENSMUSG00000030091	Nup210	protein_coding	nucleoporin 210 [Source:MGI Symbol;Acc:MGI:1859555]	54563	0.962411	4.51537	5.57138	7.21438e-06	0.000977835
6	91212455	91272540	60086	+	ENSMUSG00000064080	Fbln2	protein_coding	fibulin 2 [Source:MGI Symbol;Acc:MGI:95488]	14115	-1.61311	5.75548	-5.43959	1.06248e-05	0.0012328
6	54923949	54972612	48664	-	ENSMUSG00000038058	Nod1	protein_coding	nucleotide-binding oligomerization domain containing 1 [Source:MGI Symbol;Acc:MGI:1341839]	107607	-1.23306	2.72325	-5.40937	1.08742e-05	0.00125225
6	83115496	83118898	3403	+	ENSMUSG00000030036	Mogs	protein_coding	mannosyl-oligosaccharide glucosidase [Source:MGI Symbol;Acc:MGI:1929872]	57377	0.543099	6.41284	5.26901	1.45343e-05	0.00146452
6	86736840	86793584	56745	-	ENSMUSG00000029994	Anxa4	protein_coding	annexin A4 [Source:MGI Symbol;Acc:MGI:88030]	11746	0.891415	7.47597	5.12355	2.08344e-05	0.00170642
6	72206177	72235577	29401	-	ENSMUSG00000037621	Atoh8	protein_coding	atonal bHLH transcription factor 8 [Source:MGI Symbol;Acc:MGI:1918343]	71093	-1.08579	2.3504	-5.11108	2.18549e-05	0.00172541
6	124530345	124542359	12015	-	ENSMUSG00000038521	C1s1	protein_coding	complement component 1, s subcomponent 1 [Source:MGI Symbol;Acc:MGI:1355312]	50908	-1.52327	2.86874	-5.10846	2.32838e-05	0.00180325
6	48929895	48933687	3793	+	ENSMUSG00000029813	Doxl1	protein_coding	diamine oxidase-like protein 1 [Source:MGI Symbol;Acc:MGI:1917011]	69761	-3.15619	7.37906	-5.16682	2.46167e-05	0.00181622
6	101149609	101377897	228289	-	ENSMUSG00000035357	Pdzrn3	protein_coding	PDZ domain containing RING finger 3 [Source:MGI Symbol;Acc:MGI:1933157]	55983	-1.04809	3.11337	-5.02738	2.66298e-05	0.00190075
6	124512405	124523443	11039	+	ENSMUSG00000055172	C1ra	protein_coding	complement component 1, r subcomponent A [Source:MGI Symbol;Acc:MGI:1355313]	50909	-1.24775	1.56809	-5.00588	2.87321e-05	0.00198225
6	124996694	125003096	6403	+	ENSMUSG00000030329	Pianp	protein_coding	PILR alpha associated neural protein [Source:MGI Symbol;Acc:MGI:2441908]	319352	-1.39343	2.37642	-4.90377	3.75706e-05	0.0022531
6	144993835	145076184	82350	-	ENSMUSG00000030268	Bcat1	protein_coding	branched chain aminotransferase 1, cytosolic [Source:MGI Symbol;Acc:MGI:104861]	12035	0.799545	6.07412	4.86686	3.84014e-05	0.00227607
6	129485244	129507165	21922	-	ENSMUSG00000030162	Olr1	protein_coding	oxidized low density lipoprotein (lectin-like) receptor 1 [Source:MGI Symbol;Acc:MGI:1261434]	108078	1.1772	6.8382	4.8048	4.63811e-05	0.00254066
6	48872896	48909188	36293	+	ENSMUSG00000029811	Aoc1	protein_coding	amine oxidase, copper-containing 1 [Source:MGI Symbol;Acc:MGI:1923757]	76507	-1.57133	7.16462	-4.7929	5.0575e-05	0.00265662
6	54501173	54566489	65317	-	ENSMUSG00000019124	Scrn1	protein_coding	secernin 1 [Source:MGI Symbol;Acc:MGI:1917188]	69938	1.39889	3.23458	4.77214	5.1843e-05	0.00267349
6	135237326	135254351	17026	-	ENSMUSG00000030206	Gsg1	protein_coding	germ cell associated 1 [Source:MGI Symbol;Acc:MGI:1194499]	14840	1.70748	-1.6074	4.74444	5.81413e-05	0.00287841
6	71707561	71810710	103150	+	ENSMUSG00000052852	Reep1	protein_coding	receptor accessory protein 1 [Source:MGI Symbol;Acc:MGI:1098827]	52250	-0.696902	3.54862	-4.5921	7.42327e-05	0.00334784
6	143828425	144781977	953553	-	ENSMUSG00000041540	Sox5	protein_coding	SRY (sex determining region Y)-box 5 [Source:MGI Symbol;Acc:MGI:98367]	20678	-1.43361	1.88664	-4.5567	8.8403e-05	0.00375064
6	86028681	86124409	95729	+	ENSMUSG00000030000	Add2	protein_coding	adducin 2 (beta) [Source:MGI Symbol;Acc:MGI:87919]	11519	-1.80309	4.22843	-4.53874	9.79095e-05	0.00396715
6	136923655	136941899	18245	-	ENSMUSG00000030220	Arhgdib	protein_coding	Rho, GDP dissociation inhibitor (GDI) beta [Source:MGI Symbol;Acc:MGI:101940]	11857	0.818753	4.89245	4.4597	0.000103195	0.00409988
6	88724412	88828360	103949	+	ENSMUSG00000033174	Mgll	protein_coding	monoglyceride lipase [Source:MGI Symbol;Acc:MGI:1346042]	23945	-0.529455	6.19789	-4.45368	0.000103327	0.00409988
6	84571414	84593908	22495	-	ENSMUSG00000063415	Cyp26b1	protein_coding	cytochrome P450, family 26, subfamily b, polypeptide 1 [Source:MGI Symbol;Acc:MGI:2176159]	232174	-1.17748	5.56676	-4.47258	0.000104461	0.00411947
6	48860329	48866083	5755	+	ENSMUSG00000108084	Gm7932	lincRNA	predicted gene 7932 [Source:MGI Symbol;Acc:MGI:3643446]	666105	-1.25743	3.66158	-4.44787	0.000112358	0.00418703
6	142756686	142775714	19029	+	ENSMUSG00000030282	Cmas	protein_coding	cytidine monophospho-N-acetylneuraminic acid synthetase [Source:MGI Symbol;Acc:MGI:1337124]	12764	0.561645	5.94996	4.40156	0.000117306	0.0043141
6	113471427	113483140	11714	+	ENSMUSG00000030281	Il17rc	protein_coding	interleukin 17 receptor C [Source:MGI Symbol;Acc:MGI:2159336]	171095	-0.830136	4.1239	-4.38543	0.000123773	0.00441889
6	140622663	140678472	55810	+	ENSMUSG00000030232	Aebp2	protein_coding	AE binding protein 2 [Source:MGI Symbol;Acc:MGI:1338038]	11569	0.671249	5.60347	4.36071	0.000129996	0.00456656
6	38287396	38299259	11864	-	ENSMUSG00000047749	Zc3hav1l	protein_coding	zinc finger CCCH-type, antiviral 1-like [Source:MGI Symbol;Acc:MGI:2443387]	209032	0.780615	2.98047	4.34161	0.000137128	0.0047091
6	21985916	22256404	270489	+	ENSMUSG00000062980	Cped1	protein_coding	cadherin-like and PC-esterase domain containing 1 [Source:MGI Symbol;Acc:MGI:2444814]	214642	-1.60665	4.18642	-4.38152	0.000140032	0.00475551
6	87133853	87335821	201969	-	ENSMUSG00000033420	Antxr1	protein_coding	anthrax toxin receptor 1 [Source:MGI Symbol;Acc:MGI:1916788]	69538	-1.58862	6.35611	-4.31672	0.0001639	0.00519728
6	17463800	17573980	110181	+	ENSMUSG00000009376	Met	protein_coding	met proto-oncogene [Source:MGI Symbol;Acc:MGI:96969]	17295	-1.13275	3.5376	-4.22987	0.000188295	0.00565475
6	4003904	4008445	4542	+	ENSMUSG00000032766	Gng11	protein_coding	guanine nucleotide binding protein (G protein), gamma 11 [Source:MGI Symbol;Acc:MGI:1913316]	66066	-1.15146	4.6721	-4.18056	0.000213206	0.00611511
6	119923969	120038672	114704	-	ENSMUSG00000045962	Wnk1	protein_coding	WNK lysine deficient protein kinase 1 [Source:MGI Symbol;Acc:MGI:2442092]	232341	0.470975	9.04919	4.07415	0.000259139	0.00665491
6	37870811	37966296	95486	+	ENSMUSG00000029833	Trim24	protein_coding	tripartite motif-containing 24 [Source:MGI Symbol;Acc:MGI:109275]	21848	-0.443716	4.70942	-4.07228	0.00026027	0.00665491
6	39603237	39725463	122227	-	ENSMUSG00000002413	Braf	protein_coding	Braf transforming gene [Source:MGI Symbol;Acc:MGI:88190]	109880	0.521877	5.772	4.05946	0.000268713	0.00678173
6	72368794	72380468	11675	-	ENSMUSG00000073002	Vamp5	protein_coding	vesicle-associated membrane protein 5 [Source:MGI Symbol;Acc:MGI:1858622]	53620	-0.695677	2.03462	-4.06172	0.000269215	0.00678173
6	55203383	55320222	116840	+	ENSMUSG00000038022	Mindy4	protein_coding	MINDY lysine 48 deubiquitinase 4 [Source:MGI Symbol;Acc:MGI:3583959]	330323	-1.56677	2.04902	-4.0819	0.000292224	0.00711557
6	36388084	36528414	140331	+	ENSMUSG00000045613	Chrm2	protein_coding	cholinergic receptor, muscarinic 2, cardiac [Source:MGI Symbol;Acc:MGI:88397]	243764	-1.72618	0.188207	-4.08617	0.000297005	0.00719768
6	93241720	93244206	2487	+	ENSMUSG00000107655	Gm44220	TEC	predicted gene, 44220 [Source:MGI Symbol;Acc:MGI:5690612]	NA	-1.36715	-0.197606	-4.05641	0.000300555	0.00726072
6	117168535	117181367	12833	+	ENSMUSG00000061353	Cxcl12	protein_coding	chemokine (C-X-C motif) ligand 12 [Source:MGI Symbol;Acc:MGI:103556]	20315	0.681507	6.99744	4.00146	0.000311347	0.00746259
6	41620624	41636405	15782	-	ENSMUSG00000029868	Trpv6	protein_coding	transient receptor potential cation channel, subfamily V, member 6 [Source:MGI Symbol;Acc:MGI:1927259]	64177	-1.21843	4.15394	-4.02312	0.0003178	0.00753472
6	138140316	138156755	16440	+	ENSMUSG00000008540	Mgst1	protein_coding	microsomal glutathione S-transferase 1 [Source:MGI Symbol;Acc:MGI:1913850]	56615	-0.807481	3.95499	-3.94012	0.000365609	0.00817469
6	43345001	43666278	321278	-	ENSMUSG00000029735	Tpk1	protein_coding	thiamine pyrophosphokinase [Source:MGI Symbol;Acc:MGI:1352500]	29807	0.562535	2.85737	3.92929	0.00036866	0.00821892
6	122505845	122529290	23446	+	ENSMUSG00000030116	Mfap5	protein_coding	microfibrillar associated protein 5 [Source:MGI Symbol;Acc:MGI:1354387]	50530	-1.08916	7.29995	-3.92608	0.000394518	0.00858302
6	72414308	72430712	16405	+	ENSMUSG00000053460	Ggcx	protein_coding	gamma-glutamyl carboxylase [Source:MGI Symbol;Acc:MGI:1927655]	56316	0.534475	4.59574	3.86778	0.00042742	0.00896763
6	125083437	125084029	593	+	ENSMUSG00000107761	2010008C14Rik	TEC	RIKEN cDNA 2010008C14 gene [Source:MGI Symbol;Acc:MGI:1917109]	NA	1.24353	-0.223	3.87048	0.000465197	0.00943299
6	122577792	122602444	24653	-	ENSMUSG00000040613	Apobec1	protein_coding	apolipoprotein B mRNA editing enzyme, catalytic polypeptide 1 [Source:MGI Symbol;Acc:MGI:103298]	11810	-1.09233	1.79545	-3.85618	0.0004687	0.00943312
6	145615757	145621479	5723	+	ENSMUSG00000067338	Tuba3b	protein_coding	tubulin, alpha 3B [Source:MGI Symbol;Acc:MGI:1095408]	22147	-1.33568	-0.224906	-3.86603	0.000478491	0.00956695
6	60731575	60829855	98281	-	ENSMUSG00000025889	Snca	protein_coding	synuclein, alpha [Source:MGI Symbol;Acc:MGI:1277151]	20617	-1.72595	4.59947	-3.88791	0.000486047	0.00965538
6	48974963	48978746	3784	+	ENSMUSG00000068536	Doxl2	protein_coding	diamine oxidase-like protein 2 [Source:MGI Symbol;Acc:MGI:3618290]	243376	-1.93805	10.8745	-3.88678	0.000504315	0.00992814
6	34598500	34775473	176974	+	ENSMUSG00000029761	Cald1	protein_coding	caldesmon 1 [Source:MGI Symbol;Acc:MGI:88250]	109624	0.466851	8.09833	3.75962	0.000554111	0.0104517
6	39462378	39557867	95490	-	ENSMUSG00000038456	Dennd2a	protein_coding	DENN/MADD domain containing 2A [Source:MGI Symbol;Acc:MGI:2444961]	209773	0.492476	6.78858	3.74733	0.000570987	0.0106215
6	48840919	48847071	6153	+	ENSMUSG00000023367	Tmem176a	protein_coding	transmembrane protein 176A [Source:MGI Symbol;Acc:MGI:1913308]	66058	-1.37425	4.44908	-3.79726	0.000571286	0.0106215
6	113077365	113153435	76071	+	ENSMUSG00000034269	Setd5	protein_coding	SET domain containing 5 [Source:MGI Symbol;Acc:MGI:1920145]	72895	0.458748	7.03931	3.71488	0.000617038	0.0110715
6	34476207	34505613	29407	+	ENSMUSG00000038871	Bpgm	protein_coding	2,3-bisphosphoglycerate mutase [Source:MGI Symbol;Acc:MGI:1098242]	12183	-1.29813	5.48433	-3.75047	0.000632	0.0112163
6	35252654	35263496	10843	+	ENSMUSG00000073155	1810058I24Rik	protein_coding	RIKEN cDNA 1810058I24 gene [Source:MGI Symbol;Acc:MGI:1914955]	NA	-0.400835	6.63259	-3.69937	0.000640194	0.0113124
6	3962595	3988919	26325	-	ENSMUSG00000029664	Tfpi2	protein_coding	tissue factor pathway inhibitor 2 [Source:MGI Symbol;Acc:MGI:108543]	21789	-1.42019	8.92658	-3.74206	0.000660567	0.01151
6	72957347	72958748	1402	-	ENSMUSG00000079523	Tmsb10	protein_coding	thymosin, beta 10 [Source:MGI Symbol;Acc:MGI:109146]	19240	0.70158	10.3348	3.67165	0.000693376	0.0118789
6	57727807	57825159	97353	-	ENSMUSG00000037788	Vopp1	protein_coding	vesicular, overexpressed in cancer, prosurvival protein 1 [Source:MGI Symbol;Acc:MGI:2141658]	232023	-1.10064	3.91536	-3.68787	0.000709586	0.0120488
6	142564837	142571614	6778	-	ENSMUSG00000030247	Kcnj8	protein_coding	potassium inwardly-rectifying channel, subfamily J, member 8 [Source:MGI Symbol;Acc:MGI:1100508]	16523	-1.03356	0.290163	-3.66616	0.000738898	0.0122744
6	134981718	134986836	5119	+	ENSMUSG00000090698	Apold1	protein_coding	apolipoprotein L domain containing 1 [Source:MGI Symbol;Acc:MGI:2685921]	381823	-0.884323	0.790125	-3.64727	0.000753687	0.0123724
6	48537615	48541801	4187	+	ENSMUSG00000039347	Atp6v0e2	protein_coding	ATPase, H+ transporting, lysosomal V0 subunit E2 [Source:MGI Symbol;Acc:MGI:1923502]	76252	-0.680048	3.11021	-3.63222	0.000761007	0.0124393
6	29735503	29761365	25863	+	ENSMUSG00000001761	Smo	protein_coding	smoothened, frizzled class receptor [Source:MGI Symbol;Acc:MGI:108075]	319757	-0.873422	3.19036	-3.60356	0.000836654	0.0130358
6	71128166	71144439	16274	-	ENSMUSG00000054474	Thnsl2	protein_coding	threonine synthase-like 2 (bacterial) [Source:MGI Symbol;Acc:MGI:3041254]	232078	-0.804381	2.23985	-3.5892	0.000857082	0.0131798
6	119432531	119544347	111817	-	ENSMUSG00000030170	Wnt5b	protein_coding	wingless-type MMTV integration site family, member 5B [Source:MGI Symbol;Acc:MGI:98959]	22419	-1.17092	-0.0117089	-3.60725	0.000876852	0.0133233
6	55451978	55501451	49474	+	ENSMUSG00000029778	Adcyap1r1	protein_coding	adenylate cyclase activating polypeptide 1 receptor 1 [Source:MGI Symbol;Acc:MGI:108449]	11517	-0.917856	2.49029	-3.56106	0.000934719	0.0138723
6	125145241	125161782	16542	+	ENSMUSG00000038271	Iffo1	protein_coding	intermediate filament family orphan 1 [Source:MGI Symbol;Acc:MGI:2444516]	320678	0.877667	2.37993	3.55773	0.000935752	0.0138741
6	56832059	56879358	47300	+	ENSMUSG00000029781	Fkbp9	protein_coding	FK506 binding protein 9 [Source:MGI Symbol;Acc:MGI:1350921]	27055	0.430069	8.32763	3.53744	0.000943869	0.013954
6	125223933	125231860	7928	-	ENSMUSG00000038213	Tapbpl	protein_coding	TAP binding protein-like [Source:MGI Symbol;Acc:MGI:2384853]	213233	-0.650837	3.14752	-3.52496	0.000982345	0.0143019
6	48833818	48841496	7679	-	ENSMUSG00000029810	Tmem176b	protein_coding	transmembrane protein 176B [Source:MGI Symbol;Acc:MGI:1916348]	65963	-1.20465	4.77503	-3.54604	0.00102603	0.0147478
6	98925338	99522721	597384	-	ENSMUSG00000030067	Foxp1	protein_coding	forkhead box P1 [Source:MGI Symbol;Acc:MGI:1914004]	108655	-0.518986	4.52712	-3.49193	0.00105427	0.0150186
6	13069759	13089269	19511	+	ENSMUSG00000029571	Tmem106b	protein_coding	transmembrane protein 106B [Source:MGI Symbol;Acc:MGI:1919150]	71900	-0.408601	6.3538	-3.47661	0.00109106	0.0153309
6	39397804	39420462	22659	-	ENSMUSG00000029922	Mkrn1	protein_coding	makorin, ring finger protein, 1 [Source:MGI Symbol;Acc:MGI:1859353]	54484	-0.578933	6.81092	-3.46586	0.00112533	0.0156119
6	67422932	67491855	68924	-	ENSMUSG00000049093	Il23r	protein_coding	interleukin 23 receptor [Source:MGI Symbol;Acc:MGI:2181693]	209590	-2.50139	1.27132	-3.5801	0.00116457	0.0159255
6	137054825	137170497	115673	-	ENSMUSG00000030222	Rerg	protein_coding	RAS-like, estrogen-regulated, growth-inhibitor [Source:MGI Symbol;Acc:MGI:2665139]	232441	-1.37249	0.715312	-3.50483	0.00117515	0.0160419
6	29200434	29216364	15931	-	ENSMUSG00000003500	Impdh1	protein_coding	inosine monophosphate dehydrogenase 1 [Source:MGI Symbol;Acc:MGI:96567]	23917	-0.675154	4.86839	-3.44339	0.00119746	0.0162307
6	5220852	5256286	35435	-	ENSMUSG00000029759	Pon3	protein_coding	paraoxonase 3 [Source:MGI Symbol;Acc:MGI:106686]	269823	-1.16508	2.83247	-3.43709	0.00132884	0.0172625
6	91473703	91488463	14761	+	ENSMUSG00000030095	Tmem43	protein_coding	transmembrane protein 43 [Source:MGI Symbol;Acc:MGI:1921372]	74122	-0.506408	6.34709	-3.36344	0.00143062	0.0181155
6	58584523	58695676	111154	+	ENSMUSG00000029802	Abcg2	protein_coding	ATP binding cassette subfamily G member 2 (Junior blood group) [Source:MGI Symbol;Acc:MGI:1347061]	26357	-0.612307	4.89003	-3.34008	0.00152248	0.0190665
6	34384218	34396950	12733	+	ENSMUSG00000061758	Akr1b10	protein_coding	aldo-keto reductase family 1, member B10 (aldose reductase) [Source:MGI Symbol;Acc:MGI:1915111]	67861	-1.15628	0.957132	-3.36757	0.00157178	0.0194297
6	17281185	17289115	7931	+	ENSMUSG00000000058	Cav2	protein_coding	caveolin 2 [Source:MGI Symbol;Acc:MGI:107571]	12390	-0.813367	3.18817	-3.33017	0.00160285	0.0195816
6	88503579	88518905	15327	-	ENSMUSG00000030082	Sec61a1	protein_coding	Sec61 alpha 1 subunit (S. cerevisiae) [Source:MGI Symbol;Acc:MGI:1858417]	53421	0.343673	7.56757	3.31413	0.00160354	0.0195816
6	49822710	49829507	6798	+	ENSMUSG00000029819	Npy	protein_coding	neuropeptide Y [Source:MGI Symbol;Acc:MGI:97374]	109648	-1.304	1.06092	-3.36414	0.00163651	0.0198445
6	119175253	119221616	46364	+	ENSMUSG00000041477	Dcp1b	protein_coding	decapping mRNA 1B [Source:MGI Symbol;Acc:MGI:2442404]	319618	-0.759053	1.08197	-3.28535	0.0017679	0.0208112
6	129397297	129409335	12039	+	ENSMUSG00000030159	Clec1b	protein_coding	C-type lectin domain family 1, member b [Source:MGI Symbol;Acc:MGI:1913287]	56760	1.46665	3.08988	3.33377	0.00182363	0.0211918
6	92370908	92706155	335248	-	ENSMUSG00000030020	Prickle2	protein_coding	prickle planar cell polarity protein 2 [Source:MGI Symbol;Acc:MGI:1925144]	243548	-0.829126	2.01626	-3.27079	0.00185362	0.021475
6	55336432	55348555	12124	+	ENSMUSG00000004655	Aqp1	protein_coding	aquaporin 1 [Source:MGI Symbol;Acc:MGI:103201]	11826	-1.29625	7.24114	-3.26856	0.0020638	0.0229899
6	48739054	48743795	4742	+	ENSMUSG00000090019	Gimap1	protein_coding	GTPase, IMAP family member 1 [Source:MGI Symbol;Acc:MGI:109368]	16205	-1.06933	0.356221	-3.24726	0.00206543	0.0229899
6	134689859	134691302	1444	+	ENSMUSG00000108166	Gm44017	sense_intronic	predicted gene, 44017 [Source:MGI Symbol;Acc:MGI:5690409]	NA	1.88545	0.29396	3.30848	0.00209356	0.0231683
6	145858243	145865558	7316	-	ENSMUSG00000030256	Bhlhe41	protein_coding	basic helix-loop-helix family, member e41 [Source:MGI Symbol;Acc:MGI:1930704]	79362	0.470926	6.70436	3.19676	0.00211703	0.0233437
6	52231197	52240854	9658	-	ENSMUSG00000000938	Hoxa10	protein_coding	homeobox A10 [Source:MGI Symbol;Acc:MGI:96171]	15395	-1.03087	5.07205	-3.23224	0.00212323	0.0233785
6	146602352	146642824	40473	-	ENSMUSG00000040234	Tm7sf3	protein_coding	transmembrane 7 superfamily member 3 [Source:MGI Symbol;Acc:MGI:1914873]	67623	0.351005	4.6685	3.18775	0.00215837	0.0235932
6	18845910	18848207	2298	-	ENSMUSG00000106874	Gm20186	lincRNA	predicted gene, 20186 [Source:MGI Symbol;Acc:MGI:5012371]	NA	-0.780399	0.510866	-3.20303	0.00215968	0.0235932
6	83051266	83055273	4008	-	ENSMUSG00000068329	Htra2	protein_coding	HtrA serine peptidase 2 [Source:MGI Symbol;Acc:MGI:1928676]	64704	-0.560663	2.72446	-3.1878	0.00217282	0.0236752
6	112273758	112330425	56668	+	ENSMUSG00000057604	Lmcd1	protein_coding	LIM and cysteine-rich domains 1 [Source:MGI Symbol;Acc:MGI:1353635]	30937	-1.18969	5.53125	-3.23256	0.00219996	0.0238541
6	125067920	125082472	14553	+	ENSMUSG00000067714	Lpar5	protein_coding	lysophosphatidic acid receptor 5 [Source:MGI Symbol;Acc:MGI:2685918]	381810	0.809849	1.36182	3.19427	0.00221762	0.0239528
6	5216258	5220486	4229	-	ENSMUSG00000107881	Gm44250	TEC	predicted gene, 44250 [Source:MGI Symbol;Acc:MGI:5690642]	NA	-1.05955	2.48128	-3.21379	0.00223472	0.0240865
6	52257694	52260880	3187	-	ENSMUSG00000038203	Hoxa13	protein_coding	homeobox A13 [Source:MGI Symbol;Acc:MGI:96173]	15398	-0.810135	2.57382	-3.17963	0.00229657	0.0245226
6	52242106	52245810	3705	-	ENSMUSG00000038210	Hoxa11	protein_coding	homeobox A11 [Source:MGI Symbol;Acc:MGI:96172]	15396	-1.19441	3.52673	-3.18206	0.00248967	0.025852
6	129375515	129385874	10360	-	ENSMUSG00000030158	Clec12b	protein_coding	C-type lectin domain family 12, member B [Source:MGI Symbol;Acc:MGI:1918433]	71183	1.53126	1.32602	3.20985	0.00250207	0.0259105
6	135362545	135383173	20629	+	ENSMUSG00000030208	Emp1	protein_coding	epithelial membrane protein 1 [Source:MGI Symbol;Acc:MGI:107941]	13730	-0.933522	6.27939	-3.15363	0.00250942	0.0259516
6	67414431	67415012	582	-	ENSMUSG00000096086	Gm4761	processed_pseudogene	predicted gene 4761 [Source:MGI Symbol;Acc:MGI:3648855]	NA	-2.17532	-2.36816	-3.24596	0.00254699	0.0262162
6	49395604	49469501	73898	+	ENSMUSG00000023403	Stk31	protein_coding	serine threonine kinase 31 [Source:MGI Symbol;Acc:MGI:1924735]	77485	0.476956	3.84342	3.06893	0.00285411	0.0282175
6	118011438	118091546	80109	+	ENSMUSG00000030134	Rasgef1a	protein_coding	RasGEF domain family, member 1A [Source:MGI Symbol;Acc:MGI:1917977]	70727	-0.758082	0.719414	-3.06781	0.00296417	0.0290512
6	121183667	121198837	15171	+	ENSMUSG00000067825	Pex26	protein_coding	peroxisomal biogenesis factor 26 [Source:MGI Symbol;Acc:MGI:1921293]	74043	0.429747	4.27383	3.05065	0.00297307	0.0290962
6	113378115	113390448	12334	+	ENSMUSG00000079426	Arpc4	protein_coding	actin related protein 2/3 complex, subunit 4 [Source:MGI Symbol;Acc:MGI:1915339]	68089	0.368068	6.2196	3.03033	0.00311347	0.0300478
6	41686330	41704339	18010	-	ENSMUSG00000029866	Kel	protein_coding	Kell blood group [Source:MGI Symbol;Acc:MGI:1346053]	23925	-1.08642	0.79843	-3.07362	0.00315376	0.030284
6	141249269	141507448	258180	+	ENSMUSG00000041741	Pde3a	protein_coding	phosphodiesterase 3A, cGMP inhibited [Source:MGI Symbol;Acc:MGI:1860764]	54611	-0.741516	2.75736	-3.02053	0.00330296	0.0312641
6	127085116	127109557	24442	-	ENSMUSG00000038028	Tigar	protein_coding	Trp53 induced glycolysis regulatory phosphatase [Source:MGI Symbol;Acc:MGI:2442752]	319801	0.744599	1.85494	3.01992	0.00330971	0.0312641
6	124430581	124464794	34214	-	ENSMUSG00000008153	Clstn3	protein_coding	calsyntenin 3 [Source:MGI Symbol;Acc:MGI:2178323]	232370	0.707395	3.2284	3.00187	0.00342833	0.0319582
6	49036546	49070929	34384	+	ENSMUSG00000029816	Gpnmb	protein_coding	glycoprotein (transmembrane) nmb [Source:MGI Symbol;Acc:MGI:1934765]	93695	-1.16269	6.46963	-3.04004	0.00348324	0.0323131
6	30611010	30631745	20736	+	ENSMUSG00000029788	Cpa5	protein_coding	carboxypeptidase A5 [Source:MGI Symbol;Acc:MGI:1921899]	74649	1.37089	-1.33184	3.0583	0.00349801	0.0323131
6	129533160	129542346	9187	+	ENSMUSG00000030161	Gabarapl1	protein_coding	gamma-aminobutyric acid (GABA) A receptor-associated protein-like 1 [Source:MGI Symbol;Acc:MGI:1914980]	57436	-0.356333	7.24094	-2.96643	0.00360749	0.0330654
6	55170626	55175043	4418	-	ENSMUSG00000003477	Inmt	protein_coding	indolethylamine N-methyltransferase [Source:MGI Symbol;Acc:MGI:102963]	21743	-2.02895	2.38089	-3.06577	0.00387139	0.0344734
6	124304656	124330527	25872	+	ENSMUSG00000008845	Cd163	protein_coding	CD163 antigen [Source:MGI Symbol;Acc:MGI:2135946]	93671	-1.47308	-1.48376	-3.01525	0.00396834	0.0349707
6	142587862	142702315	114454	-	ENSMUSG00000030249	Abcc9	protein_coding	ATP-binding cassette, sub-family C (CFTR/MRP), member 9 [Source:MGI Symbol;Acc:MGI:1352630]	20928	-1.12343	0.918877	-2.98083	0.00397721	0.0350086
6	136872435	136875823	3389	-	ENSMUSG00000030218	Mgp	protein_coding	matrix Gla protein [Source:MGI Symbol;Acc:MGI:96976]	17313	-1.21625	2.93902	-2.98638	0.00401494	0.0352596
6	121300227	121337733	37507	+	ENSMUSG00000030108	Slc6a13	protein_coding	solute carrier family 6 (neurotransmitter transporter, GABA), member 13 [Source:MGI Symbol;Acc:MGI:95629]	14412	1.69911	2.10792	3.0119	0.00418085	0.0363416
6	91978878	92076004	97127	+	ENSMUSG00000034037	Fgd5	protein_coding	FYVE, RhoGEF and PH domain containing 5 [Source:MGI Symbol;Acc:MGI:2443369]	232237	-0.819691	3.93888	-2.92645	0.00419312	0.0363862
6	142387221	142403858	16638	+	ENSMUSG00000030245	Golt1b	protein_coding	golgi transport 1B [Source:MGI Symbol;Acc:MGI:1914214]	66964	0.430887	5.86317	2.87996	0.00440337	0.0375931
6	12311610	12749410	437801	-	ENSMUSG00000032625	Thsd7a	protein_coding	thrombospondin, type I, domain containing 7A [Source:MGI Symbol;Acc:MGI:2685683]	330267	-1.02029	3.38751	-2.91097	0.00457733	0.0386474
6	82041043	82093099	52057	+	ENSMUSG00000035104	Eva1a	protein_coding	eva-1 homolog A (C. elegans) [Source:MGI Symbol;Acc:MGI:2385247]	232146	0.507759	6.15652	2.83198	0.00493546	0.0403801
6	129512555	129519227	6673	+	ENSMUSG00000030160	Tmem52b	protein_coding	transmembrane protein 52B [Source:MGI Symbol;Acc:MGI:2442838]	330428	1.3022	-1.23819	2.90096	0.00503091	0.0409859
6	140746960	140747172	213	-	ENSMUSG00000080921	Rpl38-ps2	processed_pseudogene	ribosomal protein L38, pseudogene 2 [Source:MGI Symbol;Acc:MGI:3646625]	NA	-0.679727	1.85201	-2.81135	0.00531222	0.0424867
6	72598475	72608425	9951	+	ENSMUSG00000056666	Retsat	protein_coding	retinol saturase (all trans retinol 13,14 reductase) [Source:MGI Symbol;Acc:MGI:1914692]	67442	-0.487338	5.27792	-2.76159	0.00578088	0.0450737
6	145174834	145211005	36172	-	ENSMUSG00000043541	Casc1	protein_coding	cancer susceptibility candidate 1 [Source:MGI Symbol;Acc:MGI:2444480]	320662	-1.42331	-2.07078	-2.84848	0.00586398	0.0454183
6	83121765	83125431	3667	-	ENSMUSG00000030034	Ino80b	protein_coding	INO80 complex subunit B [Source:MGI Symbol;Acc:MGI:1917270]	70020	-0.472097	2.4681	-2.75277	0.00589023	0.0455171
6	54681624	54703851	22228	+	ENSMUSG00000038065	Mturn	protein_coding	maturin, neural progenitor differentiation regulator homolog (Xenopus) [Source:MGI Symbol;Acc:MGI:1915485]	68235	-0.703175	1.94633	-2.76829	0.00589741	0.0455265
6	128843786	128846959	3174	-	ENSMUSG00000108095	Gm44067	lincRNA	predicted gene, 44067 [Source:MGI Symbol;Acc:MGI:5690459]	NA	1.27906	-1.73369	2.81672	0.006119	0.0467348
6	38875404	39084585	209182	+	ENSMUSG00000029925	Tbxas1	protein_coding	thromboxane A synthase 1, platelet [Source:MGI Symbol;Acc:MGI:98497]	21391	-1.27915	-0.952443	-2.81208	0.00618719	0.0470055
6	83480217	83506969	26753	-	ENSMUSG00000014554	Dguok	protein_coding	deoxyguanosine kinase [Source:MGI Symbol;Acc:MGI:1351602]	27369	0.347147	4.0786	2.72261	0.0062755	0.047428
6	134605234	134607681	2448	-	ENSMUSG00000107728	Gm38910	lincRNA	predicted gene, 38910 [Source:MGI Symbol;Acc:MGI:5621795]	NA	-0.841694	-0.322521	-2.74564	0.00643949	0.0481814
6	124841089	124857752	16664	-	ENSMUSG00000023191	P3h3	protein_coding	prolyl 3-hydroxylase 3 [Source:MGI Symbol;Acc:MGI:1315208]	14789	-0.738557	1.74399	-2.7308	0.00648512	0.0484518
6	99625135	99666771	41637	-	ENSMUSG00000093661	Eif4e3	protein_coding	eukaryotic translation initiation factor 4E member 3 [Source:MGI Symbol;Acc:MGI:1914142]	66892	0.400625	3.93514	2.69931	0.00661784	0.0490328
6	29396309	29426994	30686	+	ENSMUSG00000029769	Ccdc136	protein_coding	coiled-coil domain containing 136 [Source:MGI Symbol;Acc:MGI:1918128]	232664	-0.858178	1.27808	-2.72763	0.00674606	0.0496743
6	42358487	42373268	14782	-	ENSMUSG00000029859	Epha1	protein_coding	Eph receptor A1 [Source:MGI Symbol;Acc:MGI:107381]	13835	0.457301	4.05087	2.68981	0.00677907	0.0498455
5	120680202	120711927	31726	-	ENSMUSG00000029603	Dtx1	protein_coding	deltex 1, E3 ubiquitin ligase [Source:MGI Symbol;Acc:MGI:1352744]	14357	1.18488	7.57933	6.74564	4.9644e-07	0.000400183
5	72300025	72504473	204449	-	ENSMUSG00000005220	Corin	protein_coding	corin, serine peptidase [Source:MGI Symbol;Acc:MGI:1349451]	53419	-1.1824	5.07735	-6.53306	7.98388e-07	0.000489124
5	140661827	140702378	40552	-	ENSMUSG00000036555	Iqce	protein_coding	IQ motif containing E [Source:MGI Symbol;Acc:MGI:1921489]	74239	-1.12703	2.73217	-6.38921	1.09996e-06	0.000500826
5	142960343	142973185	12843	+	ENSMUSG00000029581	Fscn1	protein_coding	fascin actin-bundling protein 1 [Source:MGI Symbol;Acc:MGI:1352745]	14086	0.812244	7.91911	5.81444	4.046e-06	0.000766029
5	43993620	44102032	108413	-	ENSMUSG00000029086	Prom1	protein_coding	prominin 1 [Source:MGI Symbol;Acc:MGI:1100886]	19126	1.01339	5.99465	5.75698	4.68197e-06	0.000824241
5	120800194	120812514	12321	-	ENSMUSG00000001166	Oas1c	protein_coding	2'-5' oligoadenylate synthetase 1C [Source:MGI Symbol;Acc:MGI:2149633]	114643	0.715601	2.08342	5.60613	6.56636e-06	0.00093991
5	120648812	120679597	30786	+	ENSMUSG00000029602	Rasal1	protein_coding	RAS protein activator like 1 (GAP1 like) [Source:MGI Symbol;Acc:MGI:1330842]	19415	1.08824	4.48945	5.60161	6.78829e-06	0.000946664
5	75932827	75978458	45632	-	ENSMUSG00000062960	Kdr	protein_coding	kinase insert domain protein receptor [Source:MGI Symbol;Acc:MGI:96683]	16542	-1.29602	6.36808	-5.33136	1.32021e-05	0.00138762
5	100553725	100572245	18521	-	ENSMUSG00000029322	Plac8	protein_coding	placenta-specific 8 [Source:MGI Symbol;Acc:MGI:2445289]	231507	1.4342	6.79869	5.27176	1.55079e-05	0.00149811
5	35056766	35087839	31074	+	ENSMUSG00000044716	Dok7	protein_coding	docking protein 7 [Source:MGI Symbol;Acc:MGI:3584043]	231134	-1.78938	-0.701639	-5.22809	1.81016e-05	0.00160256
5	23915276	24030690	115415	-	ENSMUSG00000028995	Fam126a	protein_coding	family with sequence similarity 126, member A [Source:MGI Symbol;Acc:MGI:2149839]	84652	0.979275	4.58284	5.17907	1.83677e-05	0.00161617
5	137643031	137645714	2684	-	ENSMUSG00000047182	Irs3	protein_coding	insulin receptor substrate 3 [Source:MGI Symbol;Acc:MGI:1194882]	16369	0.729416	6.57139	5.15095	1.93365e-05	0.00168271
5	137166892	137177043	10152	-	ENSMUSG00000118522	CAAA01077340.1	protein_coding	predicted, 31160 [Source:NCBI gene;Acc:102633301]	102633301	-1.01332	1.70007	-5.14185	2.01467e-05	0.00170077
5	31086106	31108237	22132	-	ENSMUSG00000029151	Slc30a3	protein_coding	solute carrier family 30 (zinc transporter), member 3 [Source:MGI Symbol;Acc:MGI:1345280]	22784	-2.30761	4.3357	-5.13038	2.45738e-05	0.00181622
5	147300805	147307270	6466	-	ENSMUSG00000029646	Cdx2	protein_coding	caudal type homeobox 2 [Source:MGI Symbol;Acc:MGI:88361]	12591	2.10467	3.72384	5.09763	2.59295e-05	0.00187328
5	114003703	114025682	21980	+	ENSMUSG00000042096	Dao	protein_coding	D-amino acid oxidase [Source:MGI Symbol;Acc:MGI:94859]	13142	2.17827	0.913501	5.05278	2.92023e-05	0.0019967
5	100845713	100899102	53390	+	ENSMUSG00000029314	Gpat3	protein_coding	glycerol-3-phosphate acyltransferase 3 [Source:MGI Symbol;Acc:MGI:3603816]	231510	0.731791	4.78821	4.9689	2.99252e-05	0.00201024
5	102481391	102897937	416547	+	ENSMUSG00000057315	Arhgap24	protein_coding	Rho GTPase activating protein 24 [Source:MGI Symbol;Acc:MGI:1922647]	231532	-0.77888	2.59721	-4.94617	3.168e-05	0.00207355
5	135908409	135934616	26208	-	ENSMUSG00000051391	Ywhag	protein_coding	tyrosine 3-monooxygenase/tryptophan 5-monooxygenase activation protein, gamma polypeptide [Source:MGI Symbol;Acc:MGI:108109]	22628	0.635296	7.11287	4.84548	4.01471e-05	0.00235591
5	147878437	147894815	16379	-	ENSMUSG00000029650	Slc46a3	protein_coding	solute carrier family 46, member 3 [Source:MGI Symbol;Acc:MGI:1918956]	71706	-1.22812	2.93962	-4.83744	4.31347e-05	0.00246512
5	124439930	124462308	22379	+	ENSMUSG00000049327	Kmt5a	protein_coding	lysine methyltransferase 5A [Source:MGI Symbol;Acc:MGI:1915206]	67956	0.664507	7.33187	4.7909	4.58351e-05	0.0025346
5	121566027	121593824	27798	-	ENSMUSG00000029455	Aldh2	protein_coding	aldehyde dehydrogenase 2, mitochondrial [Source:MGI Symbol;Acc:MGI:99600]	11669	-0.864103	5.04305	-4.75944	5.00203e-05	0.0026509
5	13125414	13602565	477152	+	ENSMUSG00000028883	Sema3a	protein_coding	sema domain, immunoglobulin domain (Ig), short basic domain, secreted, (semaphorin) 3A [Source:MGI Symbol;Acc:MGI:107558]	20346	-1.87521	1.89369	-4.8014	5.18212e-05	0.00267349
5	134357656	134456716	99061	-	ENSMUSG00000023079	Gtf2ird1	protein_coding	general transcription factor II I repeat domain-containing 1 [Source:MGI Symbol;Acc:MGI:1861942]	57080	-0.823476	3.07003	-4.73459	5.29578e-05	0.00270357
5	5664829	5694578	29750	-	ENSMUSG00000015653	Steap2	protein_coding	six transmembrane epithelial antigen of prostate 2 [Source:MGI Symbol;Acc:MGI:1921301]	74051	-0.900975	2.89083	-4.70075	5.78547e-05	0.00287841
5	117781032	117958840	177809	+	ENSMUSG00000029361	Nos1	protein_coding	nitric oxide synthase 1, neuronal [Source:MGI Symbol;Acc:MGI:97360]	18125	1.33197	4.53542	4.69793	6.15422e-05	0.00293041
5	72647795	72671078	23284	+	ENSMUSG00000067219	Nipal1	protein_coding	NIPA-like domain containing 1 [Source:MGI Symbol;Acc:MGI:1917951]	70701	-1.25046	4.07569	-4.67296	6.46356e-05	0.00301817
5	134676490	134680145	3656	+	ENSMUSG00000072573	Gm10369	antisense	predicted gene 10369 [Source:MGI Symbol;Acc:MGI:3642774]	NA	-1.73518	-1.81626	-4.64067	7.53596e-05	0.00336562
5	124111109	124112264	1156	-	ENSMUSG00000085433	Gm16001	lincRNA	predicted gene 16001 [Source:MGI Symbol;Acc:MGI:3802119]	NA	0.831267	2.99436	4.58934	7.53726e-05	0.00336562
5	24711738	24730727	18990	-	ENSMUSG00000055235	Wdr86	protein_coding	WD repeat domain 86 [Source:MGI Symbol;Acc:MGI:1915466]	269633	-1.08705	1.03013	-4.51402	9.31682e-05	0.00388819
5	111417362	111457033	39672	+	ENSMUSG00000070576	Mn1	protein_coding	meningioma 1 [Source:MGI Symbol;Acc:MGI:1261813]	433938	1.21178	3.49897	4.48242	0.000102495	0.00408808
5	137729899	137741607	11709	-	ENSMUSG00000045348	Nyap1	protein_coding	neuronal tyrosine-phosphorylated phosphoinositide 3-kinase adaptor 1 [Source:MGI Symbol;Acc:MGI:2443880]	243300	0.778165	3.55932	4.43862	0.000108276	0.00416672
5	35583040	35615352	32313	+	ENSMUSG00000029098	Acox3	protein_coding	acyl-Coenzyme A oxidase 3, pristanoyl [Source:MGI Symbol;Acc:MGI:1933156]	80911	-0.928092	5.02842	-4.41829	0.000115396	0.00426167
5	65107539	65168188	60650	+	ENSMUSG00000054920	Klhl5	protein_coding	kelch-like 5 [Source:MGI Symbol;Acc:MGI:1919028]	71778	-0.778317	3.74633	-4.39357	0.000120818	0.00435399
5	37338499	37425055	86557	+	ENSMUSG00000050248	Evc2	protein_coding	EvC ciliary complex subunit 2 [Source:MGI Symbol;Acc:MGI:1915775]	68525	-1.06413	1.8857	-4.38238	0.000128188	0.00453426
5	33820725	33897975	77251	+	ENSMUSG00000057406	Nsd2	protein_coding	nuclear receptor binding SET domain protein 2 [Source:MGI Symbol;Acc:MGI:1276574]	107823	0.523523	5.97652	4.33553	0.000137591	0.00471442
5	36794867	36796772	1906	-	ENSMUSG00000055302	Mrfap1	protein_coding	Morf4 family associated protein 1 [Source:MGI Symbol;Acc:MGI:1914818]	67568	0.607814	6.59726	4.25017	0.000169583	0.00528989
5	66016549	66173118	156570	-	ENSMUSG00000070780	Rbm47	protein_coding	RNA binding motif protein 47 [Source:MGI Symbol;Acc:MGI:2384294]	245945	0.686532	5.23902	4.20327	0.000190734	0.00569449
5	139377697	139396415	18719	+	ENSMUSG00000044197	Gpr146	protein_coding	G protein-coupled receptor 146 [Source:MGI Symbol;Acc:MGI:1933113]	80290	-0.810329	4.20546	-4.13336	0.000228364	0.00629537
5	112688876	112896362	207487	-	ENSMUSG00000072720	Myo18b	protein_coding	myosin XVIIIb [Source:MGI Symbol;Acc:MGI:1921626]	74376	-1.55827	3.90356	-4.18047	0.000228534	0.00629537
5	145114215	145130705	16491	+	ENSMUSG00000029622	Arpc1b	protein_coding	actin related protein 2/3 complex, subunit 1B [Source:MGI Symbol;Acc:MGI:1343142]	11867	0.663039	7.23537	4.11895	0.000233792	0.00639879
5	113860161	113863436	3276	+	ENSMUSG00000106623	Gm43335	TEC	predicted gene 43335 [Source:MGI Symbol;Acc:MGI:5663472]	NA	1.78249	-1.5214	4.18076	0.000236958	0.00642346
5	43233170	43289724	56555	+	ENSMUSG00000039782	Cpeb2	protein_coding	cytoplasmic polyadenylation element binding protein 2 [Source:MGI Symbol;Acc:MGI:2442640]	231207	0.642032	3.92102	4.10591	0.000241043	0.00647686
5	122707544	122729738	22195	+	ENSMUSG00000029470	P2rx4	protein_coding	purinergic receptor P2X, ligand-gated ion channel 4 [Source:MGI Symbol;Acc:MGI:1338859]	18438	-0.732539	5.86623	-4.10375	0.000243726	0.0065143
5	93093437	93176447	83011	+	ENSMUSG00000058013	Septin11	protein_coding	septin 11 [Source:MGI Symbol;Acc:MGI:1277214]	52398	0.511361	6.0347	4.09694	0.000245343	0.00651626
5	110339812	110343212	3401	-	ENSMUSG00000029503	P2rx2	protein_coding	purinergic receptor P2X, ligand-gated ion channel, 2 [Source:MGI Symbol;Acc:MGI:2665170]	231602	-1.07083	2.03627	-4.11234	0.00024889	0.00654984
5	113793729	113800516	6788	-	ENSMUSG00000054675	Tmem119	protein_coding	transmembrane protein 119 [Source:MGI Symbol;Acc:MGI:2385228]	231633	-1.08399	3.84016	-4.06173	0.00028244	0.00699184
5	93181933	93206495	24563	-	ENSMUSG00000063015	Ccni	protein_coding	cyclin I [Source:MGI Symbol;Acc:MGI:1341077]	12453	-0.623022	6.9735	-4.03599	0.00028536	0.00702664
5	149144263	149153540	9278	+	ENSMUSG00000107388	Gm42788	lincRNA	predicted gene 42788 [Source:MGI Symbol;Acc:MGI:5662925]	NA	-1.15028	1.69129	-4.06064	0.000286343	0.00703954
5	52363791	52371418	7628	+	ENSMUSG00000072941	Sod3	protein_coding	superoxide dismutase 3, extracellular [Source:MGI Symbol;Acc:MGI:103181]	20657	-1.41895	6.55011	-4.07757	0.000287853	0.00704274
5	149282752	149287868	5117	-	ENSMUSG00000107317	Gm19719	antisense	predicted gene, 19719 [Source:MGI Symbol;Acc:MGI:5011904]	NA	-1.46478	-0.169466	-4.03569	0.000321903	0.0076072
5	36868513	36955078	86566	+	ENSMUSG00000029120	Ppp2r2c	protein_coding	protein phosphatase 2, regulatory subunit B, gamma [Source:MGI Symbol;Acc:MGI:2442660]	269643	0.979347	5.16451	3.9813	0.000338393	0.0078647
5	7960457	7982213	21757	+	ENSMUSG00000012428	Steap4	protein_coding	STEAP family member 4 [Source:MGI Symbol;Acc:MGI:1923560]	117167	-1.21408	2.9002	-3.97401	0.000358431	0.00809695
5	98929773	99037351	107579	-	ENSMUSG00000029334	Prkg2	protein_coding	protein kinase, cGMP-dependent, type II [Source:MGI Symbol;Acc:MGI:108173]	19092	-1.56151	0.805297	-3.96252	0.000392576	0.00855476
5	105415775	105490074	74300	+	ENSMUSG00000070639	Lrrc8b	protein_coding	leucine rich repeat containing 8 family, member B [Source:MGI Symbol;Acc:MGI:2141353]	433926	0.489925	5.35663	3.86483	0.000430076	0.00901101
5	123142193	123168629	26437	+	ENSMUSG00000038384	Setd1b	protein_coding	SET domain containing 1B [Source:MGI Symbol;Acc:MGI:2652820]	208043	0.539631	5.70306	3.81211	0.000489003	0.00967751
5	122643911	122691432	47522	+	ENSMUSG00000029468	P2rx7	protein_coding	purinergic receptor P2X, ligand-gated ion channel, 7 [Source:MGI Symbol;Acc:MGI:1339957]	18439	-1.27529	0.118701	-3.78228	0.000581736	0.0107477
5	139271876	139325622	53747	-	ENSMUSG00000056413	Adap1	protein_coding	ArfGAP with dual PH domains 1 [Source:MGI Symbol;Acc:MGI:2442201]	231821	1.12757	3.96444	3.76859	0.000585012	0.0107857
5	43515538	43618803	103266	+	ENSMUSG00000061535	C1qtnf7	protein_coding	C1q and tumor necrosis factor related protein 7 [Source:MGI Symbol;Acc:MGI:1925911]	109323	-1.39122	-1.03039	-3.77077	0.000611917	0.0110594
5	144190286	144194441	4156	+	ENSMUSG00000052271	Bhlha15	protein_coding	basic helix-loop-helix family, member a15 [Source:MGI Symbol;Acc:MGI:891976]	17341	0.502146	5.78158	3.71649	0.000615114	0.0110715
5	66676091	66687234	11144	+	ENSMUSG00000029223	Uchl1	protein_coding	ubiquitin carboxy-terminal hydrolase L1 [Source:MGI Symbol;Acc:MGI:103149]	22223	-1.09464	4.60762	-3.74418	0.000617331	0.0110715
5	92006074	92043883	37810	-	ENSMUSG00000029403	Cdkl2	protein_coding	cyclin-dependent kinase-like 2 (CDC2-related kinase) [Source:MGI Symbol;Acc:MGI:1858227]	53886	0.502171	3.40437	3.6937	0.000649776	0.0113928
5	77205107	77211471	6365	-	ENSMUSG00000053030	Spink2	protein_coding	serine peptidase inhibitor, Kazal type 2 [Source:MGI Symbol;Acc:MGI:1917232]	69982	-1.3204	0.992571	-3.74076	0.000650124	0.0113928
5	148990056	148995223	5168	-	ENSMUSG00000106951	5930430L01Rik	lincRNA	RIKEN cDNA 5930430L01 gene [Source:MGI Symbol;Acc:MGI:2443110]	NA	-1.08001	1.23722	-3.7057	0.000676574	0.0117089
5	110879803	111289780	409978	+	ENSMUSG00000033209	Ttc28	protein_coding	tetratricopeptide repeat domain 28 [Source:MGI Symbol;Acc:MGI:2140873]	209683	-0.64209	4.61222	-3.65577	0.000716688	0.0120608
5	113937094	113993894	56801	-	ENSMUSG00000042121	Ssh1	protein_coding	slingshot protein phosphatase 1 [Source:MGI Symbol;Acc:MGI:2686240]	231637	0.460793	5.46754	3.63169	0.000753518	0.0123724
5	116408491	116422864	14374	-	ENSMUSG00000041548	Hspb8	protein_coding	heat shock protein 8 [Source:MGI Symbol;Acc:MGI:2135756]	80888	-0.837064	7.2692	-3.63493	0.000770886	0.0125144
5	116013586	116024508	10923	-	ENSMUSG00000029513	Prkab1	protein_coding	protein kinase, AMP-activated, beta 1 non-catalytic subunit [Source:MGI Symbol;Acc:MGI:1336167]	19079	-0.496306	5.27956	-3.61464	0.000785511	0.012611
5	140724127	140761439	37313	+	ENSMUSG00000050022	Amz1	protein_coding	archaelysin family metallopeptidase 1 [Source:MGI Symbol;Acc:MGI:2442258]	231842	0.768112	3.18619	3.62216	0.000787452	0.0126289
5	134656039	134688598	32560	-	ENSMUSG00000029674	Limk1	protein_coding	LIM-domain containing, protein kinase [Source:MGI Symbol;Acc:MGI:104572]	16885	0.57799	6.96965	3.59737	0.000821308	0.0129282
5	33198184	33218455	20272	-	ENSMUSG00000037379	Spon2	protein_coding	spondin 2, extracellular matrix protein [Source:MGI Symbol;Acc:MGI:1923724]	100689	-0.727729	3.13039	-3.60083	0.000824994	0.01295
5	37289098	37336894	47797	-	ENSMUSG00000029122	Evc	protein_coding	EvC ciliary complex subunit 1 [Source:MGI Symbol;Acc:MGI:1890596]	59056	-0.958904	1.71247	-3.57716	0.000905555	0.0135312
5	104079111	104113733	34623	-	ENSMUSG00000029309	Sparcl1	protein_coding	SPARC-like 1 [Source:MGI Symbol;Acc:MGI:108110]	13602	-1.04535	5.97023	-3.55898	0.00096242	0.0141548
5	28317121	28419239	102119	+	ENSMUSG00000048271	Rbm33	protein_coding	RNA binding motif protein 33 [Source:MGI Symbol;Acc:MGI:1919670]	381626	0.385083	5.20875	3.51324	0.000999712	0.0145409
5	144194442	144223615	29174	-	ENSMUSG00000066621	Tecpr1	protein_coding	tectonin beta-propeller repeat containing 1 [Source:MGI Symbol;Acc:MGI:1917631]	70381	-0.479278	5.30568	-3.50866	0.0010118	0.0146546
5	134986214	134987472	1259	+	ENSMUSG00000070473	Cldn3	protein_coding	claudin 3 [Source:MGI Symbol;Acc:MGI:1329044]	12739	-1.16128	3.8891	-3.54223	0.00102645	0.0147478
5	31569595	31571397	1803	-	ENSMUSG00000107355	AI839979	lincRNA	expressed sequence AI839979 [Source:MGI Symbol;Acc:MGI:2140975]	NA	-1.73065	-1.73571	-3.57699	0.00105194	0.0150014
5	4753839	4758035	4197	-	ENSMUSG00000044674	Fzd1	protein_coding	frizzled class receptor 1 [Source:MGI Symbol;Acc:MGI:1196625]	14362	-1.03102	4.62599	-3.51765	0.00106153	0.0150401
5	134237834	134314760	76927	-	ENSMUSG00000060261	Gtf2i	protein_coding	general transcription factor II I [Source:MGI Symbol;Acc:MGI:1202722]	14886	-0.843681	4.34503	-3.49799	0.00107528	0.0151928
5	73019987	73256619	236633	-	ENSMUSG00000070733	Fryl	protein_coding	FRY like transcription coactivator [Source:MGI Symbol;Acc:MGI:1919563]	72313	0.58317	5.94659	3.42629	0.00123712	0.016505
5	135406531	135545120	138590	-	ENSMUSG00000039959	Hip1	protein_coding	huntingtin interacting protein 1 [Source:MGI Symbol;Acc:MGI:1099804]	215114	-0.6562	5.05018	-3.42397	0.00125185	0.016658
5	134558146	134560171	2026	-	ENSMUSG00000085957	Syna	protein_coding	syncytin a [Source:MGI Symbol;Acc:MGI:2684898]	214292	1.98167	5.0269	3.48938	0.00136087	0.0175742
5	92331827	92414628	82802	+	ENSMUSG00000034842	Art3	protein_coding	ADP-ribosyltransferase 3 [Source:MGI Symbol;Acc:MGI:1202729]	109979	-1.12896	0.163797	-3.41107	0.00140515	0.0179343
5	30933143	30945591	12449	-	ENSMUSG00000029161	Cgref1	protein_coding	cell growth regulator with EF hand domain 1 [Source:MGI Symbol;Acc:MGI:1915817]	68567	-0.815212	3.83862	-3.33978	0.0015668	0.0194297
5	21372642	21378374	5733	+	ENSMUSG00000039899	Fgl2	protein_coding	fibrinogen-like protein 2 [Source:MGI Symbol;Acc:MGI:103266]	14190	-1.74846	3.1714	-3.41587	0.001571	0.0194297
5	121428590	121452506	23917	-	ENSMUSG00000029616	Erp29	protein_coding	endoplasmic reticulum protein 29 [Source:MGI Symbol;Acc:MGI:1914647]	67397	0.489087	6.58246	3.31555	0.00160137	0.0195816
5	92137938	92202798	64861	+	ENSMUSG00000029407	Uso1	protein_coding	USO1 vesicle docking factor [Source:MGI Symbol;Acc:MGI:1929095]	56041	0.436224	7.38703	3.31416	0.00160452	0.0195816
5	134702593	134747323	44731	-	ENSMUSG00000029675	Eln	protein_coding	elastin [Source:MGI Symbol;Acc:MGI:95317]	13717	-0.958901	4.40622	-3.31226	0.0017223	0.0204645
5	24586741	24594556	7816	+	ENSMUSG00000038181	Chpf2	protein_coding	chondroitin polymerizing factor 2 [Source:MGI Symbol;Acc:MGI:1917522]	100910	0.483228	6.06695	3.28338	0.00172744	0.0204779
5	29569242	29676092	106851	+	ENSMUSG00000039000	Ube3c	protein_coding	ubiquitin protein ligase E3C [Source:MGI Symbol;Acc:MGI:2140998]	100763	0.354711	5.34669	3.27633	0.00175306	0.0207047
5	24100605	24160792	60188	+	ENSMUSG00000028986	Klhl7	protein_coding	kelch-like 7 [Source:MGI Symbol;Acc:MGI:1196453]	52323	-0.50523	2.97693	-3.27267	0.00177313	0.0208261
5	31292242	31296080	3839	-	ENSMUSG00000038552	Fndc4	protein_coding	fibronectin type III domain containing 4 [Source:MGI Symbol;Acc:MGI:1917195]	64339	0.833254	3.30286	3.2656	0.00187832	0.0216792
5	15934691	16374511	439821	+	ENSMUSG00000040118	Cacna2d1	protein_coding	calcium channel, voltage-dependent, alpha2/delta subunit 1 [Source:MGI Symbol;Acc:MGI:88295]	12293	-1.08994	0.966521	-3.28258	0.00190472	0.0219015
5	93267257	93276231	8975	+	ENSMUSG00000029385	Ccng2	protein_coding	cyclin G2 [Source:MGI Symbol;Acc:MGI:1095734]	12452	-0.679155	3.50518	-3.22794	0.00200222	0.022615
5	122870665	122989823	119159	-	ENSMUSG00000029475	Kdm2b	protein_coding	lysine (K)-specific demethylase 2B [Source:MGI Symbol;Acc:MGI:1354737]	30841	0.439804	5.3801	3.16178	0.00229576	0.0245226
5	23503264	23684617	181354	-	ENSMUSG00000062604	Srpk2	protein_coding	serine/arginine-rich protein specific kinase 2 [Source:MGI Symbol;Acc:MGI:1201408]	20817	0.438064	4.69427	3.15659	0.00232368	0.0247493
5	137134922	137149322	14401	-	ENSMUSG00000037390	Muc3	protein_coding	mucin 3, intestinal [Source:MGI Symbol;Acc:MGI:1203527]	666339	-1.20215	-0.614827	-3.2044	0.00236243	0.0250082
5	150118645	150497753	379109	+	ENSMUSG00000056602	Fry	protein_coding	FRY microtubule binding protein [Source:MGI Symbol;Acc:MGI:2443895]	320365	0.772791	4.15297	3.16066	0.0023854	0.0251791
5	138754514	138810077	55564	+	ENSMUSG00000025854	Fam20c	protein_coding	family with sequence similarity 20, member C [Source:MGI Symbol;Acc:MGI:2136853]	80752	-0.831398	4.82983	-3.16421	0.00239288	0.0252059
5	112419151	112577185	158035	-	ENSMUSG00000058153	Sez6l	protein_coding	seizure related 6 homolog like [Source:MGI Symbol;Acc:MGI:1935121]	56747	-1.01368	7.17369	-3.15685	0.00253666	0.0261274
5	24543432	24556809	13378	-	ENSMUSG00000038199	Iqca1l	protein_coding	IQ motif containing with AAA domain 1 like [Source:MGI Symbol;Acc:MGI:3045319]	231045	2.03771	-1.84172	3.23633	0.00255783	0.026222
5	147561604	147726011	164408	-	ENSMUSG00000029648	Flt1	protein_coding	FMS-like tyrosine kinase 1 [Source:MGI Symbol;Acc:MGI:95558]	14254	0.616254	11.8977	3.11845	0.0025716	0.0263279
5	137309654	137314404	4751	-	ENSMUSG00000023348	Trip6	protein_coding	thyroid hormone receptor interactor 6 [Source:MGI Symbol;Acc:MGI:1343458]	22051	-0.567258	4.17916	-3.10781	0.00262277	0.0266559
5	112276691	112315361	38671	+	ENSMUSG00000029344	Tpst2	protein_coding	protein-tyrosine sulfotransferase 2 [Source:MGI Symbol;Acc:MGI:1309516]	22022	0.425882	6.26443	3.10075	0.00264624	0.0268587
5	64092950	64128351	35402	+	ENSMUSG00000029171	Pgm2	protein_coding	phosphoglucomutase 2 [Source:MGI Symbol;Acc:MGI:97564]	66681	0.483167	5.35698	3.0844	0.00275397	0.0275018
5	137061504	137072268	10765	-	ENSMUSG00000037411	Serpine1	protein_coding	serine (or cysteine) peptidase inhibitor, clade E, member 1 [Source:MGI Symbol;Acc:MGI:97608]	18787	0.534461	10.702	3.06858	0.00286637	0.0282869
5	116439275	116591817	152543	-	ENSMUSG00000063919	Srrm4	protein_coding	serine/arginine repetitive matrix 4 [Source:MGI Symbol;Acc:MGI:1916205]	68955	-1.17765	0.716917	-3.11557	0.00291332	0.0286947
5	103692374	103855322	162949	+	ENSMUSG00000029313	Aff1	protein_coding	AF4/FMR2 family, member 1 [Source:MGI Symbol;Acc:MGI:1100819]	17355	-0.554089	5.41618	-3.05194	0.00298463	0.0291906
5	139200637	139249840	49204	+	ENSMUSG00000036817	Sun1	protein_coding	Sad1 and UNC84 domain containing 1 [Source:MGI Symbol;Acc:MGI:1924303]	77053	0.366136	6.25795	3.03606	0.00307247	0.0298591
5	72755716	72868483	112768	-	ENSMUSG00000029217	Tec	protein_coding	tec protein tyrosine kinase [Source:MGI Symbol;Acc:MGI:98662]	21682	0.568	4.62487	3.02031	0.00321698	0.0306903
5	149264767	149288153	23387	+	ENSMUSG00000060063	Alox5ap	protein_coding	arachidonate 5-lipoxygenase activating protein [Source:MGI Symbol;Acc:MGI:107505]	11690	-1.03997	-0.0441485	-3.05796	0.00323776	0.0308201
5	122550204	122614518	64315	-	ENSMUSG00000029469	Ift81	protein_coding	intraflagellar transport 81 [Source:MGI Symbol;Acc:MGI:1098597]	12589	-0.630997	2.29721	-3.01314	0.00329697	0.0312477
5	24438440	24445287	6848	-	ENSMUSG00000028959	Fastk	protein_coding	Fas-activated serine/threonine kinase [Source:MGI Symbol;Acc:MGI:1913837]	66587	0.351413	5.81564	3.00436	0.00330564	0.0312641
5	114774677	114806200	31524	+	ENSMUSG00000041870	Ankrd13a	protein_coding	ankyrin repeat domain 13a [Source:MGI Symbol;Acc:MGI:1915670]	68420	0.414644	7.82325	3.00317	0.00331706	0.0312641
5	38526813	38563221	36409	-	ENSMUSG00000005103	Wdr1	protein_coding	WD repeat domain 1 [Source:MGI Symbol;Acc:MGI:1337100]	22388	0.381514	7.71488	3.00118	0.00333067	0.0313201
5	117378103	117389047	10945	-	ENSMUSG00000029363	Rfc5	protein_coding	replication factor C (activator 1) 5 [Source:MGI Symbol;Acc:MGI:1919401]	72151	0.444384	2.99955	2.99339	0.00339548	0.031788
5	36806921	36830653	23733	-	ENSMUSG00000029119	Man2b2	protein_coding	mannosidase 2, alpha B2 [Source:MGI Symbol;Acc:MGI:1195262]	17160	-1.09933	6.05483	-3.03727	0.00345268	0.0320882
5	65763521	65830108	66588	+	ENSMUSG00000037795	N4bp2	protein_coding	NEDD4 binding protein 2 [Source:MGI Symbol;Acc:MGI:2684414]	333789	0.469287	6.44868	2.96881	0.00359717	0.0330243
5	16553495	16620152	66658	+	ENSMUSG00000028864	Hgf	protein_coding	hepatocyte growth factor [Source:MGI Symbol;Acc:MGI:96079]	15234	-1.48956	-0.716609	-3.01038	0.00402911	0.0353436
5	100805192	100820965	15774	-	ENSMUSG00000035234	Abraxas1	protein_coding	BRCA1 A complex subunit [Source:MGI Symbol;Acc:MGI:1917931]	70681	0.559022	2.2917	2.88869	0.0043574	0.0374511
5	35652023	35679782	27760	-	ENSMUSG00000029096	Htra3	protein_coding	HtrA serine peptidase 3 [Source:MGI Symbol;Acc:MGI:1925808]	78558	-1.08708	9.16319	-2.93689	0.00437787	0.0374639
5	143403838	143421901	18064	+	ENSMUSG00000079111	Kdelr2	protein_coding	KDEL (Lys-Asp-Glu-Leu) endoplasmic reticulum protein retention receptor 2 [Source:MGI Symbol;Acc:MGI:1914163]	66913	0.431956	7.40836	2.88197	0.00438335	0.0374639
5	123068415	123117749	49335	+	ENSMUSG00000054434	Tmem120b	protein_coding	transmembrane protein 120B [Source:MGI Symbol;Acc:MGI:3603158]	330189	0.468452	3.94962	2.87633	0.00444757	0.0378649
5	101765130	101823858	58729	+	ENSMUSG00000029330	Cds1	protein_coding	CDP-diacylglycerol synthase 1 [Source:MGI Symbol;Acc:MGI:1921846]	74596	0.627175	5.60477	2.87082	0.0045851	0.0386704
5	9100668	9160986	60319	+	ENSMUSG00000079659	Tmem243	protein_coding	transmembrane protein 243, mitochondrial [Source:MGI Symbol;Acc:MGI:3606159]	652925	-0.585849	3.01556	-2.85246	0.00475246	0.0396222
5	136908150	136915404	7255	+	ENSMUSG00000007987	Ift22	protein_coding	intraflagellar transport 22 [Source:MGI Symbol;Acc:MGI:1914536]	67286	-0.428401	2.8537	-2.84378	0.00478142	0.0396809
5	65199696	65260415	60720	+	ENSMUSG00000037890	Wdr19	protein_coding	WD repeat domain 19 [Source:MGI Symbol;Acc:MGI:2443231]	213081	-0.441146	2.78731	-2.84359	0.00478586	0.0396809
5	57717967	58133230	415264	+	ENSMUSG00000029108	Pcdh7	protein_coding	protocadherin 7 [Source:MGI Symbol;Acc:MGI:1860487]	54216	-1.09351	1.51882	-2.89172	0.00488406	0.0401741
5	139706696	139736336	29641	-	ENSMUSG00000036718	Micall2	protein_coding	MICAL-like 2 [Source:MGI Symbol;Acc:MGI:2444818]	231830	0.856629	2.09481	2.86294	0.00491342	0.0402894
5	130245731	130255530	9800	-	ENSMUSG00000025337	Sbds	protein_coding	SBDS ribosome maturation factor [Source:MGI Symbol;Acc:MGI:1913961]	66711	-0.326408	5.71228	-2.81968	0.00504216	0.0410273
5	142724661	142817662	93002	-	ENSMUSG00000039477	Tnrc18	protein_coding	trinucleotide repeat containing 18 [Source:MGI Symbol;Acc:MGI:3648294]	231861	0.497962	7.39495	2.81254	0.00515452	0.0415508
5	92683435	92965318	281884	+	ENSMUSG00000029381	Shroom3	protein_coding	shroom family member 3 [Source:MGI Symbol;Acc:MGI:1351655]	27428	-0.615976	4.89696	-2.80398	0.00533735	0.0425765
5	75574916	75656722	81807	+	ENSMUSG00000005672	Kit	protein_coding	KIT proto-oncogene receptor tyrosine kinase [Source:MGI Symbol;Acc:MGI:96677]	16590	-0.51987	7.79467	-2.79787	0.00534044	0.042579
5	30968662	30977018	8357	+	ENSMUSG00000006642	Tcf23	protein_coding	transcription factor 23 [Source:MGI Symbol;Acc:MGI:1934960]	69852	-0.805888	0.350729	-2.79076	0.00574183	0.0448912
5	129989011	130003049	14039	-	ENSMUSG00000025534	Gusb	protein_coding	glucuronidase, beta [Source:MGI Symbol;Acc:MGI:95872]	110006	-0.445784	5.35161	-2.75617	0.00583541	0.0452762
5	97882783	98031043	148261	-	ENSMUSG00000029338	Antxr2	protein_coding	anthrax toxin receptor 2 [Source:MGI Symbol;Acc:MGI:1919164]	71914	-0.764333	5.18596	-2.7768	0.00586848	0.0454183
5	130073326	130135729	62404	+	ENSMUSG00000034118	Tpst1	protein_coding	protein-tyrosine sulfotransferase 1 [Source:MGI Symbol;Acc:MGI:1298231]	22021	0.562025	3.57763	2.75813	0.00587606	0.0454534
5	124834418	124862424	28007	-	ENSMUSG00000037979	Ccdc92	protein_coding	coiled-coil domain containing 92 [Source:MGI Symbol;Acc:MGI:106485]	215707	0.597623	3.16392	2.75757	0.00591653	0.0456512
5	30232581	30272427	39847	+	ENSMUSG00000075703	Selenoi	protein_coding	selenoprotein I [Source:MGI Symbol;Acc:MGI:107898]	28042	0.405831	5.19294	2.72899	0.00619303	0.0470265
5	25530013	25531466	1454	+	ENSMUSG00000101856	1700096K18Rik	lincRNA	RIKEN cDNA 1700096K18 gene [Source:MGI Symbol;Acc:MGI:1920821]	NA	-0.570214	0.737608	-2.7326	0.00623469	0.0472959
5	5579278	5664239	84962	-	ENSMUSG00000040473	Cfap69	protein_coding	cilia and flagella associated protein 69 [Source:MGI Symbol;Acc:MGI:2443778]	207686	-1.12885	-1.20031	-2.76753	0.00662051	0.0490328
5	117357304	117378601	21298	+	ENSMUSG00000029364	Wsb2	protein_coding	WD repeat and SOCS box-containing 2 [Source:MGI Symbol;Acc:MGI:2144041]	59043	0.354056	6.98143	2.69733	0.00664114	0.0490906
5	41624976	41708157	83182	-	ENSMUSG00000029128	Rab28	protein_coding	RAB28, member RAS oncogene family [Source:MGI Symbol;Acc:MGI:1917285]	100972	-0.361967	3.54115	-2.69071	0.0067408	0.0496614
4	150914562	150946102	31541	+	ENSMUSG00000028965	Tnfrsf9	protein_coding	tumor necrosis factor receptor superfamily, member 9 [Source:MGI Symbol;Acc:MGI:1101059]	21942	1.39054	8.92085	6.02902	2.57747e-06	0.000706661
4	135963727	135968178	4452	+	ENSMUSG00000028671	Gale	protein_coding	galactose-4-epimerase, UDP [Source:MGI Symbol;Acc:MGI:1921496]	74246	0.65047	5.34983	5.95509	2.90674e-06	0.000706661
4	118359990	118362744	2755	+	ENSMUSG00000006395	Hyi	polymorphic_pseudogene	hydroxypyruvate isomerase (putative) [Source:MGI Symbol;Acc:MGI:1915430]	NA	-1.1853	1.73662	-5.94238	3.08407e-06	0.000715585
4	43875530	43944806	69277	+	ENSMUSG00000028476	Reck	protein_coding	reversion-inducing-cysteine-rich protein with kazal motifs [Source:MGI Symbol;Acc:MGI:1855698]	53614	-0.854053	2.71156	-5.76911	4.5057e-06	0.000811874
4	47208161	47313167	105007	+	ENSMUSG00000028339	Col15a1	protein_coding	collagen, type XV, alpha 1 [Source:MGI Symbol;Acc:MGI:88449]	12819	2.23095	4.86577	5.80838	4.79447e-06	0.000834456
4	132732966	132757252	24287	-	ENSMUSG00000028885	Smpdl3b	protein_coding	sphingomyelin phosphodiesterase, acid-like 3B [Source:MGI Symbol;Acc:MGI:1916022]	100340	0.999938	4.69591	5.69102	5.45917e-06	0.000856545
4	83455680	83486459	30780	-	ENSMUSG00000028484	Psip1	protein_coding	PC4 and SFRS1 interacting protein 1 [Source:MGI Symbol;Acc:MGI:2142116]	101739	0.688459	5.49477	5.61854	6.3734e-06	0.000938606
4	135369576	135398227	28652	-	ENSMUSG00000043924	Ncmap	protein_coding	noncompact myelin associated protein [Source:MGI Symbol;Acc:MGI:2444888]	230822	1.17419	4.90474	5.46764	9.40358e-06	0.00113406
4	82881751	82885148	3398	-	ENSMUSG00000038192	Cer1	protein_coding	cerberus 1, DAN family BMP antagonist [Source:MGI Symbol;Acc:MGI:1201414]	12622	4.00682	-1.28114	5.55426	1.03405e-05	0.00120897
4	33245423	33290163	44741	-	ENSMUSG00000040128	Pnrc1	protein_coding	proline-rich nuclear receptor coactivator 1 [Source:MGI Symbol;Acc:MGI:1917838]	108767	-0.633621	6.69803	-5.1075	2.13949e-05	0.00171117
4	149518236	149566437	48202	+	ENSMUSG00000028988	Ctnnbip1	protein_coding	catenin beta interacting protein 1 [Source:MGI Symbol;Acc:MGI:1915756]	67087	0.669598	5.92484	5.08456	2.26221e-05	0.00177682
4	150917322	151861876	944555	-	ENSMUSG00000014592	Camta1	protein_coding	calmodulin binding transcription activator 1 [Source:MGI Symbol;Acc:MGI:2140230]	100072	-0.937921	3.5282	-4.98513	2.91715e-05	0.0019967
4	119175457	119190011	14555	-	ENSMUSG00000028644	Ermap	protein_coding	erythroblast membrane-associated protein [Source:MGI Symbol;Acc:MGI:1349816]	27028	2.17562	3.42698	5.03603	3.04088e-05	0.0020338
4	136423524	136444398	20875	+	ENSMUSG00000070687	Htr1d	protein_coding	5-hydroxytryptamine (serotonin) receptor 1D [Source:MGI Symbol;Acc:MGI:96276]	15552	-2.52997	3.6057	-4.99662	3.49656e-05	0.00216815
4	9844372	9862345	17974	+	ENSMUSG00000051279	Gdf6	protein_coding	growth differentiation factor 6 [Source:MGI Symbol;Acc:MGI:95689]	242316	-1.59563	-0.398584	-4.93341	3.60066e-05	0.00219712
4	46536937	46602202	65266	-	ENSMUSG00000028337	Coro2a	protein_coding	coronin, actin binding protein 2A [Source:MGI Symbol;Acc:MGI:1345966]	107684	1.25675	4.15099	4.80213	4.7195e-05	0.00256326
4	10874498	10899425	24928	+	ENSMUSG00000059482	2610301B20Rik	protein_coding	RIKEN cDNA 2610301B20 gene [Source:MGI Symbol;Acc:MGI:1914407]	67157	-0.685503	3.06749	-4.76832	4.84402e-05	0.00261485
4	46114746	46138694	23949	-	ENSMUSG00000035495	Tstd2	protein_coding	thiosulfate sulfurtransferase (rhodanese)-like domain containing 2 [Source:MGI Symbol;Acc:MGI:3039624]	272027	0.69208	3.8041	4.76078	4.93424e-05	0.00264562
4	100095791	100444765	348975	+	ENSMUSG00000035305	Ror1	protein_coding	receptor tyrosine kinase-like orphan receptor 1 [Source:MGI Symbol;Acc:MGI:1347520]	26563	-0.962611	4.48871	-4.69906	5.84478e-05	0.00287841
4	141088333	141112760	24428	+	ENSMUSG00000045004	Spata21	protein_coding	spermatogenesis associated 21 [Source:MGI Symbol;Acc:MGI:3607787]	329972	2.51861	1.99442	4.78485	5.87053e-05	0.00288153
4	133011260	133078110	66851	+	ENSMUSG00000037692	Ahdc1	protein_coding	AT hook, DNA binding motif, containing 1 [Source:MGI Symbol;Acc:MGI:2444218]	230793	0.633272	6.44414	4.64847	6.4606e-05	0.00301817
4	130531602	130574173	42572	-	ENSMUSG00000078532	Nkain1	protein_coding	Na+/K+ transporting ATPase interacting 1 [Source:MGI Symbol;Acc:MGI:1914399]	67149	1.6737	3.32255	4.65573	7.19387e-05	0.00327921
4	118208213	118291405	83193	-	ENSMUSG00000033295	Ptprf	protein_coding	protein tyrosine phosphatase, receptor type, F [Source:MGI Symbol;Acc:MGI:102695]	19268	1.25101	6.11347	4.51896	9.42661e-05	0.0038935
4	154020470	154026230	5761	-	ENSMUSG00000078350	Smim1	protein_coding	small integral membrane protein 1 [Source:MGI Symbol;Acc:MGI:1916109]	68859	-1.00742	3.64256	-4.43372	0.000112194	0.00418703
4	41517691	41569538	51848	-	ENSMUSG00000028439	Fam219a	protein_coding	family with sequence similarity 219, member A [Source:MGI Symbol;Acc:MGI:1919151]	71901	0.389801	4.79179	4.3975	0.000118307	0.00431743
4	110203722	110351909	148188	-	ENSMUSG00000028546	Elavl4	protein_coding	ELAV like RNA binding protein 4 [Source:MGI Symbol;Acc:MGI:107427]	15572	-1.30972	1.64765	-4.42871	0.000118759	0.00431928
4	41699989	41769474	69486	+	ENSMUSG00000073889	Il11ra1	protein_coding	interleukin 11 receptor, alpha chain 1 [Source:MGI Symbol;Acc:MGI:107426]	16157	-0.785046	4.91971	-4.39144	0.000121508	0.00436858
4	132492032	132510501	18470	-	ENSMUSG00000028893	Sesn2	protein_coding	sestrin 2 [Source:MGI Symbol;Acc:MGI:2651874]	230784	0.615563	6.0948	4.37818	0.000124322	0.00442818
4	114406724	114615098	208375	+	ENSMUSG00000070867	Trabd2b	protein_coding	TraB domain containing 2B [Source:MGI Symbol;Acc:MGI:3650152]	666048	-1.22603	2.79702	-4.40223	0.00012508	0.00444483
4	43631935	43651244	19310	+	ENSMUSG00000028469	Npr2	protein_coding	natriuretic peptide receptor 2 [Source:MGI Symbol;Acc:MGI:97372]	230103	-1.17092	4.55757	-4.38578	0.000129134	0.00455718
4	143267431	143299564	32134	-	ENSMUSG00000028583	Pdpn	protein_coding	podoplanin [Source:MGI Symbol;Acc:MGI:103098]	14726	-0.82026	5.16336	-4.34508	0.000136436	0.00469584
4	5644090	6108223	464134	+	ENSMUSG00000049119	Fam110b	protein_coding	family with sequence similarity 110, member B [Source:MGI Symbol;Acc:MGI:1916593]	242297	0.618968	4.70077	4.31565	0.000144716	0.00486069
4	101068983	101152370	83388	+	ENSMUSG00000035275	Raver2	protein_coding	ribonucleoprotein, PTB-binding 2 [Source:MGI Symbol;Acc:MGI:2443623]	242570	1.04904	2.00207	4.3202	0.000148969	0.0049376
4	138454314	138460123	5810	+	ENSMUSG00000046447	Camk2n1	protein_coding	calcium/calmodulin-dependent protein kinase II inhibitor 1 [Source:MGI Symbol;Acc:MGI:1913509]	66259	-1.11008	3.62883	-4.29676	0.000159204	0.00514658
4	133253090	133263113	10024	-	ENSMUSG00000028860	Sytl1	protein_coding	synaptotagmin-like 1 [Source:MGI Symbol;Acc:MGI:1933365]	269589	-1.12236	0.648575	-4.2931	0.000160939	0.00516732
4	116123840	116159849	36010	+	ENSMUSG00000028700	Pomgnt1	protein_coding	protein O-linked mannose beta 1,2-N-acetylglucosaminyltransferase [Source:MGI Symbol;Acc:MGI:1915523]	68273	0.446601	6.44913	4.27059	0.00016095	0.00516732
4	11958184	11966452	8269	-	ENSMUSG00000049225	Pdp1	protein_coding	pyruvate dehyrogenase phosphatase catalytic subunit 1 [Source:MGI Symbol;Acc:MGI:2685870]	381511	-0.895906	1.569	-4.22883	0.000182605	0.00557127
4	133240818	133252929	12112	+	ENSMUSG00000028862	Map3k6	protein_coding	mitogen-activated protein kinase kinase kinase 6 [Source:MGI Symbol;Acc:MGI:1855691]	53608	-1.03781	3.36508	-4.23391	0.000183765	0.00558441
4	86874396	86934822	60427	+	ENSMUSG00000038007	Acer2	protein_coding	alkaline ceramidase 2 [Source:MGI Symbol;Acc:MGI:1920932]	230379	-1.00492	6.57524	-4.21139	0.000193285	0.00574825
4	34949074	35157484	208411	-	ENSMUSG00000073910	Mob3b	protein_coding	MOB kinase activator 3B [Source:MGI Symbol;Acc:MGI:2664539]	214944	-0.788388	4.75829	-4.17147	0.000207672	0.00599739
4	53261356	53270232	8877	-	ENSMUSG00000086712	AI427809	lincRNA	expressed sequence AI427809 [Source:MGI Symbol;Acc:MGI:2140270]	NA	1.33601	0.763066	4.14674	0.000239098	0.00645859
4	82798738	82859958	61221	-	ENSMUSG00000028403	Zdhhc21	protein_coding	zinc finger, DHHC domain containing 21 [Source:MGI Symbol;Acc:MGI:1915518]	68268	0.641173	4.87162	4.08773	0.000251914	0.00658416
4	137277489	137299726	22238	+	ENSMUSG00000036856	Wnt4	protein_coding	wingless-type MMTV integration site family, member 4 [Source:MGI Symbol;Acc:MGI:98957]	22417	-1.00103	4.22118	-4.09052	0.000259785	0.00665491
4	145213463	145246870	33408	-	ENSMUSG00000028599	Tnfrsf1b	protein_coding	tumor necrosis factor receptor superfamily, member 1b [Source:MGI Symbol;Acc:MGI:1314883]	21938	-0.566029	7.00058	-4.04124	0.000281141	0.00697887
4	155650655	155653384	2730	-	ENSMUSG00000029061	Mmp23	protein_coding	matrix metallopeptidase 23 [Source:MGI Symbol;Acc:MGI:1347361]	26561	-1.26762	3.55054	-4.03505	0.000311283	0.00746259
4	137993022	138208508	215487	+	ENSMUSG00000028760	Eif4g3	protein_coding	eukaryotic translation initiation factor 4 gamma, 3 [Source:MGI Symbol;Acc:MGI:1923935]	230861	-0.503928	6.46625	-3.94898	0.000351008	0.00803039
4	141420779	141425311	4533	+	ENSMUSG00000006221	Hspb7	protein_coding	heat shock protein family, member 7 (cardiovascular) [Source:MGI Symbol;Acc:MGI:1352494]	29818	-1.11303	5.53599	-3.93473	0.000387829	0.00847359
4	136143497	136145755	2259	+	ENSMUSG00000007872	Id3	protein_coding	inhibitor of DNA binding 3 [Source:MGI Symbol;Acc:MGI:96398]	15903	-0.813989	3.96522	-3.8857	0.000417724	0.00883682
4	101717404	101815352	97949	+	ENSMUSG00000057722	Lepr	protein_coding	leptin receptor [Source:MGI Symbol;Acc:MGI:104993]	16847	-0.788921	10.4167	-3.84511	0.000459721	0.00940065
4	116221618	116303056	81439	+	ENSMUSG00000028698	Pik3r3	protein_coding	phosphoinositide-3-kinase regulatory subunit 3 [Source:MGI Symbol;Acc:MGI:109277]	18710	0.651026	5.49725	3.8303	0.000470493	0.00945679
4	58435255	58553898	118644	-	ENSMUSG00000038668	Lpar1	protein_coding	lysophosphatidic acid receptor 1 [Source:MGI Symbol;Acc:MGI:108429]	14745	-0.936437	5.01076	-3.78448	0.000544011	0.0103376
4	134897849	134915024	17176	-	ENSMUSG00000028822	Tmem50a	protein_coding	transmembrane protein 50A [Source:MGI Symbol;Acc:MGI:1919067]	71817	-0.688637	5.89942	-3.7496	0.000573616	0.0106362
4	115582286	115583144	859	-	ENSMUSG00000083457	Cyp4b1-ps2	unprocessed_pseudogene	cytochrome P450, family 4, subfamily b, polypeptide 1, pseudogene 2 [Source:MGI Symbol;Acc:MGI:3649236]	NA	-1.65598	-1.88523	-3.80361	0.000592078	0.0108342
4	85514172	86428385	914214	+	ENSMUSG00000066113	Adamtsl1	protein_coding	ADAMTS-like 1 [Source:MGI Symbol;Acc:MGI:1924989]	77739	-1.66383	0.0166037	-3.73292	0.000706547	0.0120105
4	66827584	66930284	102701	+	ENSMUSG00000039005	Tlr4	protein_coding	toll-like receptor 4 [Source:MGI Symbol;Acc:MGI:96824]	21898	-1.2482	2.79628	-3.66762	0.000767657	0.0124813
4	95967240	96025413	58174	+	ENSMUSG00000028572	Hook1	protein_coding	hook microtubule tethering protein 1 [Source:MGI Symbol;Acc:MGI:1925213]	77963	0.724366	3.3791	3.62766	0.000772955	0.0125144
4	42949814	42959425	9612	+	ENSMUSG00000036052	Dnajb5	protein_coding	DnaJ heat shock protein family (Hsp40) member B5 [Source:MGI Symbol;Acc:MGI:1930018]	56323	-0.92642	0.583464	-3.63556	0.000780956	0.0125642
4	102087543	102607259	519717	+	ENSMUSG00000028525	Pde4b	protein_coding	phosphodiesterase 4B, cAMP specific [Source:MGI Symbol;Acc:MGI:99557]	18578	-0.995173	3.13036	-3.62385	0.000813539	0.0128856
4	127311421	127314039	2619	-	ENSMUSG00000050234	Gja4	protein_coding	gap junction protein, alpha 4 [Source:MGI Symbol;Acc:MGI:95715]	14612	-0.769731	5.38503	-3.60036	0.000830263	0.0129626
4	138877942	138882817	4876	+	ENSMUSG00000028751	Pla2g2e	protein_coding	phospholipase A2, group IIE [Source:MGI Symbol;Acc:MGI:1349660]	26970	-1.61548	2.72658	-3.65183	0.000856397	0.0131798
4	41092722	41098183	5462	-	ENSMUSG00000028435	Aqp3	protein_coding	aquaporin 3 [Source:MGI Symbol;Acc:MGI:1333777]	11828	0.457242	5.50362	3.56056	0.000893434	0.0134744
4	155768149	155774698	6550	-	ENSMUSG00000042116	Vwa1	protein_coding	von Willebrand factor A domain containing 1 [Source:MGI Symbol;Acc:MGI:2179729]	246228	-0.980083	0.391101	-3.58082	0.000901056	0.0135035
4	19876841	19922605	45765	-	ENSMUSG00000028238	Atp6v0d2	protein_coding	ATPase, H+ transporting, lysosomal V0 subunit D2 [Source:MGI Symbol;Acc:MGI:1924415]	242341	-1.30992	4.61367	-3.60561	0.000905405	0.0135312
4	138250435	138301967	51533	+	ENSMUSG00000028758	Kif17	protein_coding	kinesin family member 17 [Source:MGI Symbol;Acc:MGI:1098229]	16559	-1.58501	-0.115966	-3.59697	0.000975471	0.014256
4	135920735	135940311	19577	+	ENSMUSG00000028673	Fuca1	protein_coding	fucosidase, alpha-L- 1, tissue [Source:MGI Symbol;Acc:MGI:95593]	71665	-0.412769	6.01858	-3.50241	0.00102603	0.0147478
4	41769467	41774247	4781	-	ENSMUSG00000073888	Ccl27a	protein_coding	chemokine (C-C motif) ligand 27A [Source:MGI Symbol;Acc:MGI:1343459]	c(20301, 100039863, 100040048, 100861978)	0.731194	5.00565	3.4821	0.00109862	0.0153806
4	135975460	135987264	11805	-	ENSMUSG00000028669	Pithd1	protein_coding	PITH (C-terminal proteasome-interacting domain of thioredoxin-like) domain containing 1 [Source:MGI Symbol;Acc:MGI:1913443]	66193	0.406137	5.56812	3.46402	0.00112424	0.0156109
4	140906344	140952586	46243	+	ENSMUSG00000028927	Padi2	protein_coding	peptidyl arginine deiminase, type II [Source:MGI Symbol;Acc:MGI:1338892]	18600	-1.17142	7.35906	-3.50326	0.00113168	0.0156575
4	21879673	21912162	32490	+	ENSMUSG00000028247	Coq3	protein_coding	coenzyme Q3 methyltransferase [Source:MGI Symbol;Acc:MGI:101813]	230027	0.560902	2.96789	3.46004	0.00113985	0.015742
4	41114427	41124455	10029	-	ENSMUSG00000028430	Nol6	protein_coding	nucleolar protein family 6 (RNA-associated) [Source:MGI Symbol;Acc:MGI:2140151]	230082	0.562524	6.52479	3.45307	0.00115905	0.0159135
4	137664726	137729861	65136	+	ENSMUSG00000041351	Rap1gap	protein_coding	Rap1 GTPase-activating protein [Source:MGI Symbol;Acc:MGI:109338]	110351	0.888719	5.41462	3.4602	0.00118756	0.0161533
4	53440413	53622478	182066	+	ENSMUSG00000028412	Slc44a1	protein_coding	solute carrier family 44, member 1 [Source:MGI Symbol;Acc:MGI:2140592]	100434	-0.505025	6.05421	-3.43828	0.00119749	0.0162307
4	43631539	43641533	9995	-	ENSMUSG00000086043	Gm12473	antisense	predicted gene 12473 [Source:MGI Symbol;Acc:MGI:3652337]	NA	-1.06942	0.763545	-3.46749	0.00120913	0.0162733
4	141301240	141329384	28145	+	ENSMUSG00000006445	Epha2	protein_coding	Eph receptor A2 [Source:MGI Symbol;Acc:MGI:95278]	13836	-0.608526	2.78835	-3.41886	0.00126165	0.0167302
4	152274232	152285337	11106	+	ENSMUSG00000042804	Gpr153	protein_coding	G protein-coupled receptor 153 [Source:MGI Symbol;Acc:MGI:1916157]	100129	-0.849815	2.72075	-3.42738	0.00127665	0.0168271
4	137862237	137965229	102993	+	ENSMUSG00000057530	Ece1	protein_coding	endothelin converting enzyme 1 [Source:MGI Symbol;Acc:MGI:1101357]	230857	-0.606621	6.72158	-3.31303	0.00162268	0.019756
4	152072498	152115400	42903	+	ENSMUSG00000039713	Plekhg5	protein_coding	pleckstrin homology domain containing, family G (with RhoGef domain) member 5 [Source:MGI Symbol;Acc:MGI:2652860]	269608	-0.768371	2.64671	-3.31713	0.00164105	0.0198445
4	116075269	116097043	21775	+	ENSMUSG00000028703	Lrrc41	protein_coding	leucine rich repeat containing 41 [Source:MGI Symbol;Acc:MGI:2441984]	230654	0.427651	5.93836	3.29785	0.00166727	0.0199737
4	83220300	83324255	103956	-	ENSMUSG00000038172	Ttc39b	protein_coding	tetratricopeptide repeat domain 39B [Source:MGI Symbol;Acc:MGI:1917113]	69863	-0.9383	2.42358	-3.32292	0.00167124	0.0199974
4	148152800	148160482	7683	-	ENSMUSG00000029001	Fbxo44	protein_coding	F-box protein 44 [Source:MGI Symbol;Acc:MGI:1354744]	230903	-0.779588	1.23806	-3.30534	0.00169118	0.0201573
4	130102558	130128135	25578	+	ENSMUSG00000028779	Pef1	protein_coding	penta-EF hand domain containing 1 [Source:MGI Symbol;Acc:MGI:1915148]	67898	-0.391656	5.7446	-3.26586	0.00179716	0.0210277
4	155839680	155844088	4409	+	ENSMUSG00000029070	Mxra8	protein_coding	matrix-remodelling associated 8 [Source:MGI Symbol;Acc:MGI:1922011]	74761	-1.01014	6.10739	-3.29819	0.00180175	0.0210385
4	14502430	14621805	119376	-	ENSMUSG00000040569	Slc26a7	protein_coding	solute carrier family 26, member 7 [Source:MGI Symbol;Acc:MGI:2384791]	208890	1.70754	1.85865	3.33352	0.00191021	0.021948
4	148591503	148594993	3491	+	ENSMUSG00000006442	Srm	protein_coding	spermidine synthase [Source:MGI Symbol;Acc:MGI:102690]	20810	0.506112	4.68835	3.21966	0.00200903	0.0226752
4	63344560	63348163	3604	+	ENSMUSG00000039196	Orm1	protein_coding	orosomucoid 1 [Source:MGI Symbol;Acc:MGI:97443]	18405	-1.35499	-0.243663	-3.28023	0.00203141	0.0228223
4	129643980	129672767	28788	-	ENSMUSG00000003731	Kpna6	protein_coding	karyopherin (importin) alpha 6 [Source:MGI Symbol;Acc:MGI:1100836]	16650	0.511929	6.47349	3.21104	0.00205076	0.0229782
4	129811219	129850003	38785	+	ENSMUSG00000028788	Ptp4a2	protein_coding	protein tyrosine phosphatase 4a2 [Source:MGI Symbol;Acc:MGI:1277117]	19244	0.323414	7.76354	3.1854	0.00217014	0.0236752
4	139352587	139378730	26144	+	ENSMUSG00000078517	Emc1	protein_coding	ER membrane protein complex subunit 1 [Source:MGI Symbol;Acc:MGI:2443696]	230866	0.430301	5.25004	3.11959	0.00253286	0.0261059
4	129148005	129189727	41723	-	ENSMUSG00000040928	S100pbp	protein_coding	S100P binding protein [Source:MGI Symbol;Acc:MGI:1921898]	74648	0.380915	5.47217	3.10615	0.00261159	0.0266483
4	40936398	40948294	11897	-	ENSMUSG00000028416	Bag1	protein_coding	BCL2-associated athanogene 1 [Source:MGI Symbol;Acc:MGI:108047]	12017	-0.456796	6.96538	-3.08712	0.00273377	0.0273484
4	136172394	136196057	23664	+	ENSMUSG00000018983	E2f2	protein_coding	E2F transcription factor 2 [Source:MGI Symbol;Acc:MGI:1096341]	242705	-1.3606	1.91254	-3.14101	0.00285565	0.0282175
4	139082284	139092993	10710	-	ENSMUSG00000041120	Nbl1	protein_coding	NBL1, DAN family BMP antagonist [Source:MGI Symbol;Acc:MGI:104591]	17965	-0.66271	7.49798	-3.05623	0.00299497	0.0292731
4	43957401	43979118	21718	+	ENSMUSG00000028480	Glipr2	protein_coding	GLI pathogenesis-related 2 [Source:MGI Symbol;Acc:MGI:1917770]	384009	0.7219	3.18353	3.05117	0.0030616	0.0298102
4	108014791	108096445	81655	-	ENSMUSG00000028600	Podn	protein_coding	podocan [Source:MGI Symbol;Acc:MGI:2674939]	242608	-1.21035	1.39427	-3.06329	0.00333118	0.0313201
4	119277981	119294604	16624	-	ENSMUSG00000028639	Ybx1	protein_coding	Y box protein 1 [Source:MGI Symbol;Acc:MGI:99146]	22608	-0.434912	7.71241	-2.98833	0.00343435	0.0319582
4	147985788	147987205	1418	+	ENSMUSG00000029019	Nppb	protein_coding	natriuretic peptide type B [Source:MGI Symbol;Acc:MGI:97368]	18158	-1.55343	3.00133	-3.07501	0.00349002	0.0323131
4	115088708	115093899	5192	+	ENSMUSG00000028716	Pdzk1ip1	protein_coding	PDZK1 interacting protein 1 [Source:MGI Symbol;Acc:MGI:1914432]	67182	-1.53631	3.60916	-3.06704	0.00354611	0.0326592
4	107806033	107823022	16990	-	ENSMUSG00000073779	Lrp8os2	antisense	low density lipoprotein receptor-related protein 8, apolipoprotein e receptor, opposite strand 2 [Source:MGI Symbol;Acc:MGI:3588233]	NA	1.35546	0.848605	3.02648	0.00376491	0.0339174
4	156221456	156234857	13402	-	ENSMUSG00000078485	Plekhn1	protein_coding	pleckstrin homology domain containing, family N member 1 [Source:MGI Symbol;Acc:MGI:2387630]	231002:231003	-0.667298	1.73667	-2.95358	0.00381032	0.034108
4	152325742	152334071	8330	+	ENSMUSG00000028936	Rpl22	protein_coding	ribosomal protein L22 [Source:MGI Symbol;Acc:MGI:99262]	19934	-0.389798	5.65945	-2.94076	0.00382776	0.0342042
4	98754898	98817537	62640	-	ENSMUSG00000035407	Kank4	protein_coding	KN motif and ankyrin repeat domains 4 [Source:MGI Symbol;Acc:MGI:3043381]	242553	-0.908188	3.16383	-2.95673	0.00398949	0.0350844
4	108637466	108780798	143333	-	ENSMUSG00000034557	Zfyve9	protein_coding	zinc finger, FYVE domain containing 9 [Source:MGI Symbol;Acc:MGI:2652838]	230597	-0.829793	4.13623	-2.93583	0.00411149	0.03582
4	107253593	107279938	26346	+	ENSMUSG00000063172	Hspb11	protein_coding	heat shock protein family B (small), member 11 [Source:MGI Symbol;Acc:MGI:1920188]	72938	0.574576	2.31894	2.86297	0.00463187	0.0388935
4	41033074	41048139	15066	-	ENSMUSG00000028427	Aqp7	protein_coding	aquaporin 7 [Source:MGI Symbol;Acc:MGI:1314647]	11832	0.65424	1.26976	2.85686	0.00475807	0.0396222
4	133491100	133498550	7451	-	ENSMUSG00000056596	Trnp1	protein_coding	TMF1-regulated nuclear protein 1 [Source:MGI Symbol;Acc:MGI:1916789]	69539	-1.17288	1.16156	-2.89762	0.00491422	0.0402894
4	141467890	141538597	70708	-	ENSMUSG00000040761	Spen	protein_coding	spen family transcription repressor [Source:MGI Symbol;Acc:MGI:1891706]	56381	0.497985	6.4791	2.8333	0.00491649	0.0402894
4	129111570	129122036	10467	-	ENSMUSG00000028785	Hpca	protein_coding	hippocalcin [Source:MGI Symbol;Acc:MGI:1336200]	15444	-0.735692	2.5425	-2.83755	0.00506136	0.041081
4	129353628	129378116	24489	-	ENSMUSG00000028807	Zbtb8a	protein_coding	zinc finger and BTB domain containing 8a [Source:MGI Symbol;Acc:MGI:1920930]	73680	-0.72465	1.0453	-2.82559	0.00519076	0.0417752
4	126609818	126614371	4554	+	ENSMUSG00000073755	5730409E04Rik	protein_coding	RIKEN cDNA 5730409E04Rik gene [Source:MGI Symbol;Acc:MGI:3609248]	230757	-0.548171	1.97454	-2.80212	0.00530612	0.04246
4	156246966	156255657	8692	-	ENSMUSG00000096351	Samd11	protein_coding	sterile alpha motif domain containing 11 [Source:MGI Symbol;Acc:MGI:2446220]	231004	-1.40993	-1.27814	-2.87558	0.00547945	0.0434385
4	136003368	136021763	18396	-	ENSMUSG00000028668	Eloa	protein_coding	elongin A [Source:MGI Symbol;Acc:MGI:1351315]	27224	0.318063	6.68957	2.78008	0.00551412	0.0435886
4	129425765	129440853	15089	-	ENSMUSG00000048485	Zbtb8b	protein_coding	zinc finger and BTB domain containing 8b [Source:MGI Symbol;Acc:MGI:2387181]	215627	-0.56578	3.84341	-2.72405	0.00635242	0.0477938
4	45799022	45804604	5583	+	ENSMUSG00000035561	Aldh1b1	protein_coding	aldehyde dehydrogenase 1 family, member B1 [Source:MGI Symbol;Acc:MGI:1919785]	72535	-0.91524	1.58765	-2.75036	0.00650038	0.0485184
4	44300876	44364675	63800	+	ENSMUSG00000035683	Melk	protein_coding	maternal embryonic leucine zipper kinase [Source:MGI Symbol;Acc:MGI:106924]	17279	0.85567	1.20831	2.74131	0.0065299	0.048644
3	95734147	95739569	5423	-	ENSMUSG00000028108	Ecm1	protein_coding	extracellular matrix protein 1 [Source:MGI Symbol;Acc:MGI:103060]	13601	-1.12033	6.6837	-6.23212	1.57218e-06	0.000551225
3	20122084	20155317	33234	-	ENSMUSG00000019528	Gyg	protein_coding	glycogenin [Source:MGI Symbol;Acc:MGI:1351614]	27357	-0.837282	4.92347	-5.77115	4.48064e-06	0.000811874
3	142493978	142522344	28367	+	ENSMUSG00000105504	Gbp5	protein_coding	guanylate binding protein 5 [Source:MGI Symbol;Acc:MGI:2429943]	229898	-1.70005	1.53218	-5.61536	7.07141e-06	0.000967015
3	93014205	93015687	1483	-	ENSMUSG00000027913	Crct1	protein_coding	cysteine-rich C-terminal 1 [Source:MGI Symbol;Acc:MGI:1921425]	74175	-1.63735	1.46755	-5.46094	1.01294e-05	0.0011934
3	14886273	14900770	14498	+	ENSMUSG00000027562	Car2	protein_coding	carbonic anhydrase 2 [Source:MGI Symbol;Acc:MGI:88269]	12349	1.5236	7.84364	5.29712	1.47697e-05	0.00146617
3	97628804	97655282	26479	+	ENSMUSG00000028088	Fmo5	protein_coding	flavin containing monooxygenase 5 [Source:MGI Symbol;Acc:MGI:1310004]	14263	-0.862275	2.83116	-5.18142	1.81008e-05	0.00160256
3	96557957	96561883	3927	+	ENSMUSG00000038393	Txnip	protein_coding	thioredoxin interacting protein [Source:MGI Symbol;Acc:MGI:1889549]	56338	-0.810477	7.42232	-5.17177	1.84663e-05	0.00161617
3	57285611	57301988	16378	-	ENSMUSG00000027800	Tm4sf1	protein_coding	transmembrane 4 superfamily member 1 [Source:MGI Symbol;Acc:MGI:104678]	17112	-1.08114	3.31701	-5.05956	2.473e-05	0.00181622
3	159839672	159938664	98993	+	ENSMUSG00000028173	Wls	protein_coding	wntless WNT ligand secretion mediator [Source:MGI Symbol;Acc:MGI:1915401]	68151	-1.00622	5.39379	-5.02479	2.6682e-05	0.00190075
3	19957054	20009145	52092	+	ENSMUSG00000003617	Cp	protein_coding	ceruloplasmin [Source:MGI Symbol;Acc:MGI:88476]	12870	-1.36792	3.57982	-4.82289	4.55885e-05	0.0025346
3	142530342	142550149	19808	+	ENSMUSG00000040253	Gbp7	protein_coding	guanylate binding protein 7 [Source:MGI Symbol;Acc:MGI:2444421]	229900	-0.932457	3.67996	-4.76327	4.98604e-05	0.0026509
3	54692807	54728766	35960	+	ENSMUSG00000027751	Supt20	protein_coding	SPT20 SAGA complex component [Source:MGI Symbol;Acc:MGI:1929651]	56790	0.555769	5.45668	4.68349	5.92636e-05	0.00288153
3	108186335	108192286	5952	+	ENSMUSG00000050947	Amigo1	protein_coding	adhesion molecule with Ig like domain 1 [Source:MGI Symbol;Acc:MGI:2653612]	229715	-0.763289	2.17922	-4.66476	6.24692e-05	0.00295302
3	123006206	123035015	28810	-	ENSMUSG00000028116	Myoz2	protein_coding	myozenin 2 [Source:MGI Symbol;Acc:MGI:1913063]	59006	-1.83756	-0.614976	-4.50695	0.000106464	0.00416107
3	8925593	9004723	79131	-	ENSMUSG00000027506	Tpd52	protein_coding	tumor protein D52 [Source:MGI Symbol;Acc:MGI:107749]	21985	0.420964	6.03329	4.43665	0.000107605	0.00416182
3	122377097	122391811	14715	-	ENSMUSG00000104554	Gm4610	antisense	predicted gene 4610 [Source:MGI Symbol;Acc:MGI:3782793]	NA	0.882378	2.9429	4.43319	0.00011073	0.00418703
3	52268336	52353221	84886	+	ENSMUSG00000044167	Foxo1	protein_coding	forkhead box O1 [Source:MGI Symbol;Acc:MGI:1890077]	56458	-0.525889	4.79968	-4.41924	0.000112319	0.00418703
3	132881745	132950291	68547	-	ENSMUSG00000040998	Npnt	protein_coding	nephronectin [Source:MGI Symbol;Acc:MGI:2148811]	114249	-0.628291	4.04216	-4.40177	0.000117458	0.0043141
3	109340653	109685698	345046	+	ENSMUSG00000033721	Vav3	protein_coding	vav 3 oncogene [Source:MGI Symbol;Acc:MGI:1888518]	57257	0.644736	3.04365	4.39944	0.000118193	0.00431743
3	92823074	92827247	4174	-	ENSMUSG00000059832	Kprp	protein_coding	keratinocyte expressed, proline-rich [Source:MGI Symbol;Acc:MGI:1920981]	433619	-1.56074	2.16232	-4.33538	0.000155788	0.00509289
3	95228732	95236409	7678	+	ENSMUSG00000046722	Cdc42se1	protein_coding	CDC42 small effector 1 [Source:MGI Symbol;Acc:MGI:1889510]	57912	0.505199	7.02919	4.26039	0.000165052	0.00520151
3	123076519	123236149	159631	-	ENSMUSG00000050315	Synpo2	protein_coding	synaptopodin 2 [Source:MGI Symbol;Acc:MGI:2153070]	118449	-1.1758	3.20296	-4.27958	0.00016777	0.00525475
3	9250602	9285333	34732	+	ENSMUSG00000069114	Zbtb10	protein_coding	zinc finger and BTB domain containing 10 [Source:MGI Symbol;Acc:MGI:2139883]	229055	0.850944	5.83144	4.22092	0.00018523	0.00561133
3	79641611	79737880	96270	-	ENSMUSG00000034009	Rxfp1	protein_coding	relaxin/insulin-like family peptide receptor 1 [Source:MGI Symbol;Acc:MGI:2682211]	381489	-2.73922	0.0201923	-4.2376	0.000233238	0.00639879
3	38886940	39011985	125046	+	ENSMUSG00000046743	Fat4	protein_coding	FAT atypical cadherin 4 [Source:MGI Symbol;Acc:MGI:3045256]	329628	-1.22429	1.59936	-4.13067	0.000244022	0.0065143
3	89436706	89450952	14247	+	ENSMUSG00000042613	Pbxip1	protein_coding	pre B cell leukemia transcription factor interacting protein 1 [Source:MGI Symbol;Acc:MGI:2441670]	229534	-0.657839	6.34788	-4.06482	0.000266555	0.00677042
3	89268246	89270570	2325	-	ENSMUSG00000027953	Slc50a1	protein_coding	solute carrier family 50 (sugar transporter), member 1 [Source:MGI Symbol;Acc:MGI:107417]	19729	-0.716127	3.7916	-4.04179	0.000282996	0.00699184
3	123446913	123506597	59685	+	ENSMUSG00000027978	Prss12	protein_coding	protease, serine 12 neurotrypsin (motopsin) [Source:MGI Symbol;Acc:MGI:1100881]	19142	-0.774186	2.52944	-4.04381	0.000283033	0.00699184
3	107741048	107760469	19422	-	ENSMUSG00000014599	Csf1	protein_coding	colony stimulating factor 1 (macrophage) [Source:MGI Symbol;Acc:MGI:1339753]	12977	-0.848628	6.50264	-4.04019	0.000287835	0.00704274
3	79884533	79946280	61748	+	ENSMUSG00000027955	Gask1b	protein_coding	golgi associated kinase 1B [Source:MGI Symbol;Acc:MGI:1915909]	68659	-0.992709	2.85703	-4.01272	0.000313968	0.00750408
3	8663359	8667256	3898	-	ENSMUSG00000040289	Hey1	protein_coding	hairy/enhancer-of-split related with YRPW motif 1 [Source:MGI Symbol;Acc:MGI:1341800]	15213	-0.944495	1.43721	-3.99863	0.00032266	0.0076072
3	109123149	109168457	45309	+	ENSMUSG00000040322	Slc25a24	protein_coding	solute carrier family 25 (mitochondrial carrier, phosphate carrier), member 24 [Source:MGI Symbol;Acc:MGI:1917160]	229731	0.462731	5.94019	3.97614	0.000328517	0.0077053
3	108284082	108361511	77430	+	ENSMUSG00000068747	Sort1	protein_coding	sortilin 1 [Source:MGI Symbol;Acc:MGI:1338015]	20661	0.617761	4.77613	3.94833	0.000352846	0.00803039
3	69574158	69598960	24803	-	ENSMUSG00000043300	B3galnt1	protein_coding	UDP-GalNAc:betaGlcNAc beta 1,3-galactosaminyltransferase, polypeptide 1 [Source:MGI Symbol;Acc:MGI:1349405]	26879	-1.15412	4.31268	-3.97509	0.000353699	0.00803746
3	82358044	82395268	37225	+	ENSMUSG00000033900	Map9	protein_coding	microtubule-associated protein 9 [Source:MGI Symbol;Acc:MGI:2442208]	213582	0.707175	3.26927	3.92731	0.00037347	0.00827795
3	81932601	81956725	24125	+	ENSMUSG00000028015	Ctso	protein_coding	cathepsin O [Source:MGI Symbol;Acc:MGI:2139628]	229445	-0.910298	4.23294	-3.89208	0.000416605	0.00882534
3	27416162	27711307	295146	-	ENSMUSG00000039286	Fndc3b	protein_coding	fibronectin type III domain containing 3B [Source:MGI Symbol;Acc:MGI:1919257]	72007	0.551659	8.64278	3.84213	0.000454976	0.00935357
3	41477577	41482391	4815	-	ENSMUSG00000105260	Gm40040	lincRNA	predicted gene, 40040 [Source:MGI Symbol;Acc:MGI:5622925]	NA	1.28486	-0.725832	3.87323	0.000465614	0.00943299
3	129914960	129970206	55247	-	ENSMUSG00000027994	Mcub	protein_coding	mitochondrial calcium uniporter dominant negative beta subunit [Source:MGI Symbol;Acc:MGI:1914065]	66815	-0.884695	2.34489	-3.8223	0.000492123	0.00972562
3	95219135	95232171	13037	-	ENSMUSG00000053192	Mllt11	protein_coding	myeloid/lymphoid or mixed-lineage leukemia; translocated to, 11 [Source:MGI Symbol;Acc:MGI:1929671]	56772	0.728921	3.50431	3.75287	0.000571278	0.0106215
3	103968110	104024598	56489	+	ENSMUSG00000058388	Phtf1	protein_coding	putative homeodomain transcription factor 1 [Source:MGI Symbol;Acc:MGI:1332671]	18685	0.46289	4.38635	3.72926	0.000596092	0.0108687
3	138065052	138081506	16455	+	ENSMUSG00000090066	1110002E22Rik	protein_coding	RIKEN cDNA 1110002E22 gene [Source:MGI Symbol;Acc:MGI:1915066]	102634333	1.53236	0.867477	3.78986	0.000599246	0.0109133
3	86672033	86672168	136	-	ENSMUSG00000094392	Gm3788	processed_pseudogene	predicted gene 3788 [Source:MGI Symbol;Acc:MGI:3781961]	NA	0.92705	0.959029	3.72892	0.000622066	0.0111173
3	37307749	37312708	4960	-	ENSMUSG00000045031	Cetn4	protein_coding	centrin 4 [Source:MGI Symbol;Acc:MGI:2677454]	207175	-0.809996	0.393659	-3.7138	0.000634148	0.0112414
3	86786151	86920852	134702	-	ENSMUSG00000028078	Dclk2	protein_coding	doublecortin-like kinase 2 [Source:MGI Symbol;Acc:MGI:1918012]	70762	1.32323	0.575415	3.74921	0.000637051	0.0112799
3	142620602	142638008	17407	+	ENSMUSG00000028270	Gbp2	protein_coding	guanylate binding protein 2 [Source:MGI Symbol;Acc:MGI:102772]	14469	-0.973856	3.88487	-3.71569	0.000647603	0.0113788
3	89083981	89093311	9331	-	ENSMUSG00000041263	Rusc1	protein_coding	RUN and SH3 domain containing 1 [Source:MGI Symbol;Acc:MGI:1919546]	72296	-1.24687	3.99543	-3.71187	0.00068822	0.011817
3	30995747	31052959	57213	+	ENSMUSG00000037643	Prkci	protein_coding	protein kinase C, iota [Source:MGI Symbol;Acc:MGI:99260]	18759	0.525752	6.88121	3.65414	0.000715038	0.0120608
3	95006590	95015448	8859	-	ENSMUSG00000019338	Zfp687	protein_coding	zinc finger protein 687 [Source:MGI Symbol;Acc:MGI:1925516]	78266	0.447819	5.8947	3.62817	0.000759788	0.0124326
3	115710433	115715072	4640	-	ENSMUSG00000045092	S1pr1	protein_coding	sphingosine-1-phosphate receptor 1 [Source:MGI Symbol;Acc:MGI:1096355]	13609	-0.880823	4.88195	-3.59675	0.000851644	0.0131755
3	146852367	146984009	131643	+	ENSMUSG00000036745	Ttll7	protein_coding	tubulin tyrosine ligase-like family, member 7 [Source:MGI Symbol;Acc:MGI:1918142]	70892	-1.06022	1.85621	-3.59728	0.000878971	0.0133422
3	104915910	104916163	254	-	ENSMUSG00000106105	Gm4525	processed_pseudogene	predicted gene 4525 [Source:MGI Symbol;Acc:MGI:3782710]	NA	-1.06674	0.0479965	-3.59516	0.000884677	0.0133879
3	93468754	93471980	3227	+	ENSMUSG00000027908	Tchhl1	protein_coding	trichohyalin-like 1 [Source:MGI Symbol;Acc:MGI:1918575]	71325	-1.26675	3.11109	-3.55674	0.00101222	0.0146546
3	18071950	18243338	171389	-	ENSMUSG00000039519	Cyp7b1	protein_coding	cytochrome P450, family 7, subfamily b, polypeptide 1 [Source:MGI Symbol;Acc:MGI:104978]	13123	-1.49113	-1.2755	-3.51431	0.00117534	0.0160419
3	67478972	67515523	36552	-	ENSMUSG00000049404	Rarres1	protein_coding	retinoic acid receptor responder (tazarotene induced) 1 [Source:MGI Symbol;Acc:MGI:1924461]	109222	-1.21577	2.37702	-3.48362	0.00119855	0.0162308
3	51685907	52105076	419170	-	ENSMUSG00000061143	Maml3	protein_coding	mastermind like transcriptional coactivator 3 [Source:MGI Symbol;Acc:MGI:2389461]	433586	0.42406	6.42213	3.4344	0.00120651	0.0162667
3	116859464	116908177	48714	+	ENSMUSG00000033386	Frrs1	protein_coding	ferric-chelate reductase 1 [Source:MGI Symbol;Acc:MGI:108076]	20321	-0.629161	3.87086	-3.41489	0.00127594	0.0168271
3	96601149	96626171	25023	+	ENSMUSG00000049288	Lix1l	protein_coding	Lix1-like [Source:MGI Symbol;Acc:MGI:3036267]	280411	-0.797753	3.07501	-3.42167	0.00128296	0.0168524
3	116669470	116712831	43362	-	ENSMUSG00000027957	Slc35a3	protein_coding	solute carrier family 35 (UDP-N-acetylglucosamine (UDP-GlcNAc) transporter), member 3 [Source:MGI Symbol;Acc:MGI:1917648]	229782	0.538852	5.01898	3.39961	0.00131476	0.0171232
3	98280435	98310738	30304	+	ENSMUSG00000027875	Hmgcs2	protein_coding	3-hydroxy-3-methylglutaryl-Coenzyme A synthase 2 [Source:MGI Symbol;Acc:MGI:101939]	15360	-1.06952	3.31199	-3.42683	0.00133516	0.0173101
3	75875084	75956949	81866	-	ENSMUSG00000034109	Golim4	protein_coding	golgi integral membrane protein 4 [Source:MGI Symbol;Acc:MGI:1920374]	73124	-0.718514	3.44364	-3.38887	0.00137176	0.0176554
3	104945272	104961921	16650	-	ENSMUSG00000027840	Wnt2b	protein_coding	wingless-type MMTV integration site family, member 2B [Source:MGI Symbol;Acc:MGI:1261834]	22414	1.12913	0.791965	3.38501	0.00149746	0.0188361
3	89146074	89160196	14123	-	ENSMUSG00000028051	Hcn3	protein_coding	hyperpolarization-activated, cyclic nucleotide-gated K+ 3 [Source:MGI Symbol;Acc:MGI:1298211]	15168	-1.43453	0.88746	-3.39489	0.00155939	0.0193861
3	32949408	33143247	193840	-	ENSMUSG00000027674	Pex5l	protein_coding	peroxisomal biogenesis factor 5-like [Source:MGI Symbol;Acc:MGI:1916672]	58869	1.3758	0.561703	3.38688	0.00157135	0.0194297
3	102262405	102445132	182728	+	ENSMUSG00000105891	A230001M10Rik	lincRNA	RIKEN cDNA A230001M10 gene [Source:MGI Symbol;Acc:MGI:2443043]	NA	2.44789	-3.2069	3.45062	0.00159374	0.0195435
3	94497544	94582716	85173	-	ENSMUSG00000028136	Snx27	protein_coding	sorting nexin family member 27 [Source:MGI Symbol;Acc:MGI:1923992]	76742	0.440333	5.75334	3.29535	0.00167749	0.0200523
3	151437887	151545086	107200	+	ENSMUSG00000039167	Adgrl4	protein_coding	adhesion G protein-coupled receptor L4 [Source:MGI Symbol;Acc:MGI:2655562]	170757	-0.901227	5.02286	-3.30262	0.00174179	0.0206161
3	95988429	95996001	7573	-	ENSMUSG00000015745	Plekho1	protein_coding	pleckstrin homology domain containing, family O member 1 [Source:MGI Symbol;Acc:MGI:1914470]	67220	-0.690739	5.94329	-3.28345	0.00175765	0.0207238
3	60472830	60629750	156921	+	ENSMUSG00000027763	Mbnl1	protein_coding	muscleblind like splicing factor 1 [Source:MGI Symbol;Acc:MGI:1928482]	56758	-0.559918	4.67892	-3.27158	0.00178328	0.0209133
3	81036416	81214040	177625	+	ENSMUSG00000028019	Pdgfc	protein_coding	platelet-derived growth factor, C polypeptide [Source:MGI Symbol;Acc:MGI:1859631]	54635	-0.849132	2.31333	-3.28647	0.0017921	0.0209845
3	10012548	10016607	4060	+	ENSMUSG00000027533	Fabp5	protein_coding	fatty acid binding protein 5, epidermal [Source:MGI Symbol;Acc:MGI:101790]	16592	-0.739488	5.39868	-3.26303	0.00185868	0.0215174
3	87617559	87738034	120476	+	ENSMUSG00000041977	Arhgef11	protein_coding	Rho guanine nucleotide exchange factor (GEF) 11 [Source:MGI Symbol;Acc:MGI:2441869]	213498	0.444767	6.3518	3.24217	0.0019015	0.0218973
3	90498956	90509498	10543	-	ENSMUSG00000001017	Chtop	protein_coding	chromatin target of PRMT1 [Source:MGI Symbol;Acc:MGI:1913761]	66511	0.294238	5.736	3.23603	0.00192724	0.0220445
3	107278858	107284082	5225	+	ENSMUSG00000087260	Lamtor5	protein_coding	late endosomal/lysosomal adaptor, MAPK and MTOR activator 5 [Source:MGI Symbol;Acc:MGI:1915826]	68576	-0.378742	4.38207	-3.23424	0.00193569	0.0220917
3	87948666	87953376	4711	+	ENSMUSG00000004885	Crabp2	protein_coding	cellular retinoic acid binding protein II [Source:MGI Symbol;Acc:MGI:88491]	12904	-0.915319	4.91504	-3.2564	0.00195255	0.0222179
3	79673367	79676876	3510	-	ENSMUSG00000098204	Gm26984	sense_intronic	predicted gene, 26984 [Source:MGI Symbol;Acc:MGI:5504099]	NA	-2.494	-2.05325	-3.34421	0.00208179	0.0231216
3	89831370	89858834	27465	+	ENSMUSG00000046280	She	protein_coding	src homology 2 domain-containing transforming protein E [Source:MGI Symbol;Acc:MGI:1099462]	214547	-0.925074	3.01359	-3.17511	0.00237883	0.02514
3	115938973	116007406	68434	-	ENSMUSG00000054414	Slc30a7	protein_coding	solute carrier family 30 (zinc transporter), member 7 [Source:MGI Symbol;Acc:MGI:1913750]	66500	0.427805	6.45666	3.13737	0.00242986	0.0254728
3	95676201	95687917	11717	-	ENSMUSG00000015850	Adamtsl4	protein_coding	ADAMTS-like 4 [Source:MGI Symbol;Acc:MGI:2389008]	229595	-0.921013	2.90746	-3.15733	0.00248024	0.0257716
3	127633135	127635631	2497	+	ENSMUSG00000027967	Neurog2	protein_coding	neurogenin 2 [Source:MGI Symbol;Acc:MGI:109619]	11924	0.801199	4.44024	3.13442	0.00255308	0.026222
3	31149920	31164324	14405	+	ENSMUSG00000037625	Cldn11	protein_coding	claudin 11 [Source:MGI Symbol;Acc:MGI:106925]	18417	-1.28182	5.36333	-3.16175	0.00266816	0.0270097
3	90668978	90670035	1058	+	ENSMUSG00000056054	S100a8	protein_coding	S100 calcium binding protein A8 (calgranulin A) [Source:MGI Symbol;Acc:MGI:88244]	20201	-1.03889	3.51095	-3.12511	0.00275449	0.0275018
3	82092427	82145789	53363	-	ENSMUSG00000033910	Gucy1a1	protein_coding	guanylate cyclase 1, soluble, alpha 1 [Source:MGI Symbol;Acc:MGI:1926562]	60596	-1.01565	3.09829	-3.12067	0.00276871	0.027593
3	157566892	157645888	78997	+	ENSMUSG00000040016	Ptger3	protein_coding	prostaglandin E receptor 3 (subtype EP3) [Source:MGI Symbol;Acc:MGI:97795]	19218	0.606377	5.35508	3.0421	0.00307121	0.0298591
3	19644474	19692421	47948	+	ENSMUSG00000060913	Trim55	protein_coding	tripartite motif-containing 55 [Source:MGI Symbol;Acc:MGI:3036269]	381485	1.13552	-0.143243	3.08765	0.00308541	0.0299279
3	88744700	88775164	30465	-	ENSMUSG00000068923	Syt11	protein_coding	synaptotagmin XI [Source:MGI Symbol;Acc:MGI:1859547]	229521	-0.804295	4.4716	-3.02291	0.00332801	0.0313201
3	100451628	100489324	37697	-	ENSMUSG00000044468	Tent5c	protein_coding	terminal nucleotidyltransferase 5C [Source:MGI Symbol;Acc:MGI:1921895]	74645	-0.764072	5.74547	-3.00622	0.00343188	0.0319582
3	89215180	89226837	11658	+	ENSMUSG00000028047	Thbs3	protein_coding	thrombospondin 3 [Source:MGI Symbol;Acc:MGI:98739]	21827	-1.08055	0.47945	-3.02383	0.00354935	0.0326694
3	135584655	135691547	106893	-	ENSMUSG00000028163	Nfkb1	protein_coding	nuclear factor of kappa light polypeptide gene enhancer in B cells 1, p105 [Source:MGI Symbol;Acc:MGI:97312]	18033	-0.380951	4.48332	-2.95991	0.00366265	0.0333316
3	14641727	14663002	21276	+	ENSMUSG00000027555	Car13	protein_coding	carbonic anhydrase 13 [Source:MGI Symbol;Acc:MGI:1931322]	71934	-1.33145	0.859171	-3.02179	0.00378724	0.0339809
3	87250758	87263738	12981	-	ENSMUSG00000015852	Fcrls	protein_coding	Fc receptor-like S, scavenger receptor [Source:MGI Symbol;Acc:MGI:1933397]	80891	-1.06047	0.802864	-2.98308	0.00389377	0.0346525
3	146729574	146812990	83417	-	ENSMUSG00000005034	Prkacb	protein_coding	protein kinase, cAMP dependent, catalytic, beta [Source:MGI Symbol;Acc:MGI:97594]	18749	-0.365025	6.13119	-2.91202	0.00408709	0.0356683
3	90511034	90514392	3359	-	ENSMUSG00000044080	S100a1	protein_coding	S100 calcium binding protein A1 [Source:MGI Symbol;Acc:MGI:1338917]	20193	-0.705373	6.60026	-2.92258	0.00412529	0.0358815
3	79062516	79286517	224002	-	ENSMUSG00000062232	Rapgef2	protein_coding	Rap guanine nucleotide exchange factor (GEF) 2 [Source:MGI Symbol;Acc:MGI:2659071]	76089	0.507707	5.7921	2.88545	0.0043675	0.0374639
3	52198248	52200489	2242	+	ENSMUSG00000103170	Gm37170	lincRNA	predicted gene, 37170 [Source:MGI Symbol;Acc:MGI:5610398]	NA	1.24103	-0.858113	2.94043	0.00451041	0.0382154
3	87971078	87980451	9374	+	ENSMUSG00000004891	Nes	protein_coding	nestin [Source:MGI Symbol;Acc:MGI:101784]	18008	-0.861801	3.57073	-2.86899	0.00485052	0.0400272
3	32817546	32938071	120526	+	ENSMUSG00000056900	Usp13	protein_coding	ubiquitin specific peptidase 13 (isopeptidase T-3) [Source:MGI Symbol;Acc:MGI:1919857]	72607	-0.76537	0.263185	-2.85828	0.00485625	0.0400314
3	93442330	93449077	6748	+	ENSMUSG00000052415	Tchh	protein_coding	trichohyalin [Source:MGI Symbol;Acc:MGI:2177944]	99681	-0.758868	4.38079	-2.8492	0.00495253	0.0404981
3	95499256	95509362	10107	+	ENSMUSG00000028111	Ctsk	protein_coding	cathepsin K [Source:MGI Symbol;Acc:MGI:107823]	13038	-1.24318	7.75814	-2.89723	0.00500503	0.0408185
3	123507552	123508404	853	-	ENSMUSG00000104960	Snhg8	processed_transcript	small nucleolar RNA host gene 8 [Source:MGI Symbol;Acc:MGI:1917145]	NA	-0.811292	-0.378097	-2.83437	0.00519327	0.0417752
3	94661830	94670696	8867	-	ENSMUSG00000085006	BC021767	transcribed_unprocessed_pseudogene	cDNA sequence BC021767 [Source:MGI Symbol;Acc:MGI:3615512]	NA	1.13613	-0.279874	2.85689	0.00536529	0.0427548
3	144729677	144760977	31301	-	ENSMUSG00000056025	Clca3a1	protein_coding	chloride channel accessory 3A1 [Source:MGI Symbol;Acc:MGI:1316732]	12722	-0.959164	0.529676	-2.83025	0.0054529	0.0432953
3	59316735	59344394	27660	-	ENSMUSG00000036334	Igsf10	protein_coding	immunoglobulin superfamily, member 10 [Source:MGI Symbol;Acc:MGI:1923481]	242050	-0.776936	-0.0292492	-2.80917	0.0054604	0.0433313
3	122931493	122984510	53018	-	ENSMUSG00000039701	Usp53	protein_coding	ubiquitin specific peptidase 53 [Source:MGI Symbol;Acc:MGI:2139607]	99526	-0.701514	5.93981	-2.79368	0.00555972	0.0438254
3	107981702	107986453	4752	-	ENSMUSG00000040562	Gstm2	protein_coding	glutathione S-transferase, mu 2 [Source:MGI Symbol;Acc:MGI:95861]	14863	-0.678851	4.15534	-2.77787	0.00573756	0.0448912
3	10366907	10428856	61950	+	ENSMUSG00000027536	Chmp4c	protein_coding	charged multivesicular body protein 4C [Source:MGI Symbol;Acc:MGI:1913621]	66371	-0.510403	3.85889	-2.76239	0.00578283	0.0450737
3	107438303	107459552	21250	-	ENSMUSG00000027895	Kcnc4	protein_coding	potassium voltage gated channel, Shaw-related subfamily, member 4 [Source:MGI Symbol;Acc:MGI:96670]	99738	0.895126	2.5505	2.79025	0.00588751	0.0455171
3	122728947	122859374	130428	+	ENSMUSG00000053965	Pde5a	protein_coding	phosphodiesterase 5A, cGMP-specific [Source:MGI Symbol;Acc:MGI:2651499]	242202	-0.639499	3.5449	-2.74458	0.00614234	0.0468122
3	138458956	138489515	30560	-	ENSMUSG00000005813	Metap1	protein_coding	methionyl aminopeptidase 1 [Source:MGI Symbol;Acc:MGI:1922874]	75624	0.326663	5.61836	2.71894	0.00632655	0.0476623
3	84666192	84704575	38384	+	ENSMUSG00000056498	Tmem154	protein_coding	transmembrane protein 154 [Source:MGI Symbol;Acc:MGI:2444725]	320782	-0.832176	4.58723	-2.74967	0.00636273	0.0477938
3	103279293	103358775	79483	+	ENSMUSG00000033014	Trim33	protein_coding	tripartite motif-containing 33 [Source:MGI Symbol;Acc:MGI:2137357]	94093	0.330942	6.08798	2.71496	0.00638331	0.0479249
3	37348346	37410108	61763	+	ENSMUSG00000037225	Fgf2	protein_coding	fibroblast growth factor 2 [Source:MGI Symbol;Acc:MGI:95516]	14173	-0.918312	4.22871	-2.75486	0.00643772	0.0481814
3	95058530	95106930	48401	-	ENSMUSG00000028126	Pip5k1a	protein_coding	phosphatidylinositol-4-phosphate 5-kinase, type 1 alpha [Source:MGI Symbol;Acc:MGI:107929]	18720	0.428408	6.99805	2.70407	0.00655477	0.048758
3	81957090	81976202	19113	-	ENSMUSG00000028011	Tdo2	protein_coding	tryptophan 2,3-dioxygenase [Source:MGI Symbol;Acc:MGI:1928486]	56720	-1.17373	1.02258	-2.77035	0.00665411	0.049139
2	6431786	6436033	4248	-	ENSMUSG00000085716	Gm13388	antisense	predicted gene 13388 [Source:MGI Symbol;Acc:MGI:3649903]	NA	2.13032	-0.400985	7.14308	2.28706e-07	0.000282757
2	110360917	110363183	2267	-	ENSMUSG00000074971	Fibin	protein_coding	fin bud initiation factor homolog (zebrafish) [Source:MGI Symbol;Acc:MGI:1914856]	67606	-2.08842	-0.374752	-6.36807	1.28463e-06	0.00051537
2	152485663	152490138	4476	-	ENSMUSG00000027468	Defb22	protein_coding	defensin beta 22 [Source:MGI Symbol;Acc:MGI:3045368]	442835	1.90619	0.168823	6.02575	2.76702e-06	0.000706661
2	102811141	102901665	90525	-	ENSMUSG00000005087	Cd44	protein_coding	CD44 antigen [Source:MGI Symbol;Acc:MGI:88338]	12505	-1.15606	4.1223	-5.93478	3.13033e-06	0.000715585
2	163726584	163750239	23656	-	ENSMUSG00000017697	Ada	protein_coding	adenosine deaminase [Source:MGI Symbol;Acc:MGI:87916]	11486	1.31429	8.34816	5.5362	8.11986e-06	0.00101109
2	103263433	103303278	39846	-	ENSMUSG00000012350	Ehf	protein_coding	ets homologous factor [Source:MGI Symbol;Acc:MGI:1270840]	13661	-2.60411	-1.12221	-5.43617	1.21469e-05	0.00132887
2	93201760	93334505	132746	-	ENSMUSG00000027217	Tspan18	protein_coding	tetraspanin 18 [Source:MGI Symbol;Acc:MGI:1917186]	241556	-0.961335	3.97092	-5.26762	1.48379e-05	0.00146617
2	4017717	4614043	596327	+	ENSMUSG00000026657	Frmd4a	protein_coding	FERM domain containing 4A [Source:MGI Symbol;Acc:MGI:1919850]	209630	0.835496	6.71816	5.24306	1.55957e-05	0.00149811
2	26208637	26237525	28889	-	ENSMUSG00000036327	Qsox2	protein_coding	quiescin Q6 sulfhydryl oxidase 2 [Source:MGI Symbol;Acc:MGI:2387194]	227638	-0.717343	3.21329	-5.13028	2.03074e-05	0.00170077
2	12106632	12301922	195291	-	ENSMUSG00000026768	Itga8	protein_coding	integrin alpha 8 [Source:MGI Symbol;Acc:MGI:109442]	241226	-1.47112	0.882708	-5.1069	2.31996e-05	0.00180325
2	120299957	120314165	14209	-	ENSMUSG00000046971	Pla2g4f	protein_coding	phospholipase A2, group IVF [Source:MGI Symbol;Acc:MGI:2685493]	271844	2.21441	3.36246	5.10088	2.60947e-05	0.00187637
2	85048022	85073048	25027	+	ENSMUSG00000033955	Tnks1bp1	protein_coding	tankyrase 1 binding protein 1 [Source:MGI Symbol;Acc:MGI:2446193]	228140	-0.694492	5.96689	-4.97475	2.9465e-05	0.00200572
2	118277110	118373419	96310	-	ENSMUSG00000040133	Gpr176	protein_coding	G protein-coupled receptor 176 [Source:MGI Symbol;Acc:MGI:2685858]	381413	-1.86401	0.39931	-4.97428	3.3886e-05	0.00215377
2	25399351	25409494	10144	+	ENSMUSG00000015094	Npdc1	protein_coding	neural proliferation, differentiation and control 1 [Source:MGI Symbol;Acc:MGI:1099802]	18146	-1.11344	4.94971	-4.92266	3.45567e-05	0.00216029
2	31572651	31617526	44876	+	ENSMUSG00000026843	Fubp3	protein_coding	far upstream element (FUSE) binding protein 3 [Source:MGI Symbol;Acc:MGI:2443699]	320267	0.755774	4.68516	4.90539	3.49081e-05	0.00216815
2	69380445	69404533	24089	+	ENSMUSG00000027068	Dhrs9	protein_coding	dehydrogenase/reductase (SDR family) member 9 [Source:MGI Symbol;Acc:MGI:2442798]	241452	0.881196	6.55553	4.86832	3.84893e-05	0.00227607
2	154376313	154408099	31787	-	ENSMUSG00000027488	Snta1	protein_coding	syntrophin, acidic 1 [Source:MGI Symbol;Acc:MGI:101772]	20648	-1.11802	3.69365	-4.85787	4.04583e-05	0.00235612
2	120166412	120245335	78924	-	ENSMUSG00000050211	Pla2g4e	protein_coding	phospholipase A2, group IVE [Source:MGI Symbol;Acc:MGI:1919144]	329502	2.08638	3.83073	4.88573	4.33996e-05	0.0024699
2	163623272	163645131	21860	-	ENSMUSG00000017707	Serinc3	protein_coding	serine incorporator 3 [Source:MGI Symbol;Acc:MGI:1349457]	26943	-0.542186	8.40844	-4.79283	4.55057e-05	0.0025346
2	22588103	22589647	1545	-	ENSMUSG00000083563	Gm13340	unprocessed_pseudogene	predicted gene 13340 [Source:MGI Symbol;Acc:MGI:3650227]	NA	-1.24617	4.07694	-4.81348	4.58399e-05	0.0025346
2	102550012	102643041	93030	+	ENSMUSG00000027188	Pamr1	protein_coding	peptidase domain containing associated with muscle regeneration 1 [Source:MGI Symbol;Acc:MGI:2445082]	210622	-1.72319	5.30383	-4.81179	4.94024e-05	0.00264562
2	92915098	92956058	40961	+	ENSMUSG00000027220	Syt13	protein_coding	synaptotagmin XIII [Source:MGI Symbol;Acc:MGI:1933945]	80976	1.77508	3.73816	4.78402	5.32937e-05	0.00270357
2	3284212	3328877	44666	+	ENSMUSG00000026643	Nmt2	protein_coding	N-myristoyltransferase 2 [Source:MGI Symbol;Acc:MGI:1202298]	18108	0.746552	5.91783	4.6762	6.07025e-05	0.00291448
2	165055627	165072948	17322	+	ENSMUSG00000017652	Cd40	protein_coding	CD40 antigen [Source:MGI Symbol;Acc:MGI:88336]	21939	-1.11621	1.56831	-4.60973	7.40241e-05	0.00334784
2	118779719	118811293	31575	+	ENSMUSG00000040035	Disp2	protein_coding	dispatched RND tramsporter family member 2 [Source:MGI Symbol;Acc:MGI:2388733]	214240	-1	3.249	-4.60207	7.43187e-05	0.00334784
2	91184061	91202834	18774	-	ENSMUSG00000002108	Nr1h3	protein_coding	nuclear receptor subfamily 1, group H, member 3 [Source:MGI Symbol;Acc:MGI:1352462]	22259	-1.2973	2.41495	-4.56668	8.44457e-05	0.00362288
2	120265595	120289197	23603	-	ENSMUSG00000070719	Pla2g4d	protein_coding	phospholipase A2, group IVD [Source:MGI Symbol;Acc:MGI:1925640]	78390	2.39026	3.42171	4.62528	8.56945e-05	0.00366523
2	70039126	70429198	390073	+	ENSMUSG00000042064	Myo3b	protein_coding	myosin IIIB [Source:MGI Symbol;Acc:MGI:2448580]	329421	-1.93235	-0.724952	-4.51968	0.000104627	0.00411947
2	145675215	145887616	212402	+	ENSMUSG00000001768	Rin2	protein_coding	Ras and Rab interactor 2 [Source:MGI Symbol;Acc:MGI:1921280]	74030	-0.6377	5.28863	-4.42063	0.000112241	0.00418703
2	32646595	32682669	36075	+	ENSMUSG00000026814	Eng	protein_coding	endoglin [Source:MGI Symbol;Acc:MGI:95392]	13805	-1.31376	6.31727	-4.37715	0.000134918	0.00466457
2	121017891	121037072	19182	-	ENSMUSG00000023216	Epb42	protein_coding	erythrocyte membrane protein band 4.2 [Source:MGI Symbol;Acc:MGI:95402]	13828	-1.3867	1.10789	-4.28187	0.000172731	0.00537711
2	167538195	167542814	4620	+	ENSMUSG00000042821	Snai1	protein_coding	snail family zinc finger 1 [Source:MGI Symbol;Acc:MGI:98330]	20613	0.71904	5.90615	4.22649	0.000180638	0.00555553
2	125300594	125507993	207400	-	ENSMUSG00000027204	Fbn1	protein_coding	fibrillin 1 [Source:MGI Symbol;Acc:MGI:95489]	14118	-1.13114	4.5694	-4.2398	0.000183707	0.00558441
2	157097533	157135265	37733	-	ENSMUSG00000027639	Samhd1	protein_coding	SAM domain and HD domain, 1 [Source:MGI Symbol;Acc:MGI:1927468]	56045	-0.738406	5.54487	-4.2135	0.000186693	0.00563981
2	113746164	113758646	12483	-	ENSMUSG00000074934	Grem1	protein_coding	gremlin 1, DAN family BMP antagonist [Source:MGI Symbol;Acc:MGI:1344337]	23892	-2.28326	0.0659261	-4.28099	0.000198528	0.00583619
2	129592835	129632228	39394	+	ENSMUSG00000037902	Sirpa	protein_coding	signal-regulatory protein alpha [Source:MGI Symbol;Acc:MGI:108563]	19261	-1.06474	3.59894	-4.17897	0.00021113	0.00607831
2	17343909	17731464	387556	-	ENSMUSG00000053702	Nebl	protein_coding	nebulette [Source:MGI Symbol;Acc:MGI:1921353]	74103	-0.970375	1.80923	-4.14337	0.000227226	0.00628194
2	33560965	33640608	79644	-	ENSMUSG00000038765	Lmx1b	protein_coding	LIM homeobox transcription factor 1 beta [Source:MGI Symbol;Acc:MGI:1100513]	16917	1.24936	1.4562	4.14229	0.00023815	0.00644436
2	26628457	26636497	8041	+	ENSMUSG00000036186	Dipk1b	protein_coding	divergent protein kinase domain 1B [Source:MGI Symbol;Acc:MGI:1927576]	56279	1.33579	0.144453	4.1237	0.000253092	0.00659245
2	6472000	6478619	6620	+	ENSMUSG00000086109	Gm13391	lincRNA	predicted gene 13391 [Source:MGI Symbol;Acc:MGI:3651526]	NA	1.25579	1.72973	4.07684	0.00028019	0.00697639
2	133552159	133562885	10727	+	ENSMUSG00000027358	Bmp2	protein_coding	bone morphogenetic protein 2 [Source:MGI Symbol;Acc:MGI:88177]	12156	-0.936773	2.0848	-4.0141	0.000310334	0.00746166
2	38511643	38594606	82964	+	ENSMUSG00000026749	Nek6	protein_coding	NIMA (never in mitosis gene a)-related expressed kinase 6 [Source:MGI Symbol;Acc:MGI:1891638]	59126	0.591384	6.96709	3.99422	0.000315347	0.00750408
2	93661028	93822568	161541	-	ENSMUSG00000027198	Ext2	protein_coding	exostosin glycosyltransferase 2 [Source:MGI Symbol;Acc:MGI:108050]	14043	0.418088	7.48018	3.95414	0.000346371	0.0079655
2	131175182	131180067	4886	-	ENSMUSG00000068267	Cenpb	protein_coding	centromere protein B [Source:MGI Symbol;Acc:MGI:88376]	12616	-0.549264	6.37271	-3.94398	0.000355639	0.00806071
2	122765237	122809569	44333	+	ENSMUSG00000005803	Sqor	protein_coding	sulfide quinone oxidoreductase [Source:MGI Symbol;Acc:MGI:1929899]	59010	-1.19383	2.85173	-3.97513	0.000356157	0.00806071
2	160568379	160619971	51593	-	ENSMUSG00000078956	Gm14221	lincRNA	predicted gene 14221 [Source:MGI Symbol;Acc:MGI:3650696]	NA	-1.17763	0.495532	-3.96832	0.000361138	0.00811673
2	16356304	16755839	399536	+	ENSMUSG00000026748	Plxdc2	protein_coding	plexin domain containing 2 [Source:MGI Symbol;Acc:MGI:1914698]	67448	-1.09225	4.36452	-3.93904	0.000382362	0.00840854
2	90429754	90580647	150894	-	ENSMUSG00000025314	Ptprj	protein_coding	protein tyrosine phosphatase, receptor type, J [Source:MGI Symbol;Acc:MGI:104574]	19271	0.734472	4.38814	3.86616	0.000434283	0.00902199
2	25624666	25628030	3365	-	ENSMUSG00000026938	Fcna	protein_coding	ficolin A [Source:MGI Symbol;Acc:MGI:1340905]	14133	-1.80145	-2.15116	-3.92478	0.000449049	0.00926498
2	132868305	132880891	12587	-	ENSMUSG00000043110	Lrrn4	protein_coding	leucine rich repeat neuronal 4 [Source:MGI Symbol;Acc:MGI:2445154]	320974	-1.84195	5.55636	-3.91872	0.000458853	0.00939698
2	148871722	148875692	3971	-	ENSMUSG00000027447	Cst3	protein_coding	cystatin C [Source:MGI Symbol;Acc:MGI:102519]	13010	-0.481678	8.3224	-3.83788	0.000458928	0.00939698
2	163336242	163397993	61752	-	ENSMUSG00000017817	Jph2	protein_coding	junctophilin 2 [Source:MGI Symbol;Acc:MGI:1891496]	59091	-1.08585	3.70959	-3.85933	0.000464558	0.00943299
2	152736251	152737410	1160	+	ENSMUSG00000042745	Id1	protein_coding	inhibitor of DNA binding 1, HLH protein [Source:MGI Symbol;Acc:MGI:96396]	15901	-0.860515	2.33807	-3.8128	0.00050192	0.00989369
2	68210445	68472268	261824	-	ENSMUSG00000027030	Stk39	protein_coding	serine/threonine kinase 39 [Source:MGI Symbol;Acc:MGI:1858416]	53416	0.462128	5.38521	3.79633	0.000507177	0.00994493
2	32621758	32635058	13301	+	ENSMUSG00000026817	Ak1	protein_coding	adenylate kinase 1 [Source:MGI Symbol;Acc:MGI:87977]	11636	-1.26835	2.30492	-3.826	0.000521572	0.0101065
2	169633013	170071816	438804	+	ENSMUSG00000047907	Tshz2	protein_coding	teashirt zinc finger family member 2 [Source:MGI Symbol;Acc:MGI:2153084]	228911	-1.09244	4.8273	-3.80001	0.000538051	0.0102662
2	13573927	13582826	8900	+	ENSMUSG00000026728	Vim	protein_coding	vimentin [Source:MGI Symbol;Acc:MGI:98932]	22352	-0.971994	7.5512	-3.78832	0.000542085	0.0103166
2	10370510	10595253	224744	+	ENSMUSG00000061186	Sfmbt2	protein_coding	Scm-like with four mbt domains 2 [Source:MGI Symbol;Acc:MGI:2447794]	353282	0.86258	7.50229	3.77847	0.000545847	0.0103468
2	33216069	33247717	31649	+	ENSMUSG00000004105	Angptl2	protein_coding	angiopoietin-like 2 [Source:MGI Symbol;Acc:MGI:1347002]	26360	-1.27509	6.56582	-3.76149	0.000612323	0.0110594
2	127363208	127367221	4014	+	ENSMUSG00000058620	Adra2b	protein_coding	adrenergic receptor, alpha 2b [Source:MGI Symbol;Acc:MGI:87935]	11552	0.685711	6.6429	3.6797	0.000679002	0.0117377
2	34171457	34373142	201686	-	ENSMUSG00000038718	Pbx3	protein_coding	pre B cell leukemia homeobox 3 [Source:MGI Symbol;Acc:MGI:97496]	18516	-0.636935	2.17643	-3.67498	0.00068401	0.0117627
2	74691924	74695105	3182	+	ENSMUSG00000050368	Hoxd10	protein_coding	homeobox D10 [Source:MGI Symbol;Acc:MGI:96202]	15430	-1.31489	1.59885	-3.69575	0.00072572	0.0121203
2	166566342	166713832	147491	-	ENSMUSG00000039621	Prex1	protein_coding	phosphatidylinositol-3,4,5-trisphosphate-dependent Rac exchange factor 1 [Source:MGI Symbol;Acc:MGI:3040696]	277360	0.488232	7.01813	3.63556	0.000746925	0.0123275
2	90940382	91019497	79116	+	ENSMUSG00000005506	Celf1	protein_coding	CUGBP, Elav-like family member 1 [Source:MGI Symbol;Acc:MGI:1342295]	13046	0.526921	4.67651	3.63239	0.00075342	0.0123724
2	150618105	150668500	50396	-	ENSMUSG00000027452	Acss1	protein_coding	acyl-CoA synthetase short-chain family member 1 [Source:MGI Symbol;Acc:MGI:1915988]	68738	-0.970901	3.68888	-3.61991	0.000817745	0.0128932
2	73596526	73616012	19487	+	ENSMUSG00000086544	Chn1os3	antisense	chimerin 1, opposite strand 3 [Source:MGI Symbol;Acc:MGI:3705094]	NA	-2.12096	0.712712	-3.69631	0.000831749	0.0129726
2	19657752	19660583	2832	+	ENSMUSG00000043415	Otud1	protein_coding	OTU domain containing 1 [Source:MGI Symbol;Acc:MGI:1918448]	71198	-0.824843	1.66034	-3.59674	0.000844132	0.013099
2	26055535	26123220	67686	-	ENSMUSG00000026932	Nacc2	protein_coding	nucleus accumbens associated 2, BEN and BTB (POZ) domain containing [Source:MGI Symbol;Acc:MGI:1915241]	67991	-0.575298	2.86404	-3.57988	0.000856372	0.0131798
2	163820861	163833146	12286	+	ENSMUSG00000027656	Ccn5	protein_coding	cellular communication network factor 5 [Source:MGI Symbol;Acc:MGI:1328326]	22403	-1.20383	-1.49831	-3.60077	0.000896848	0.0134932
2	35313986	35336976	22991	-	ENSMUSG00000026880	Stom	protein_coding	stomatin [Source:MGI Symbol;Acc:MGI:95403]	13830	-0.998913	5.62455	-3.57566	0.00091572	0.0136698
2	30057378	30072577	15200	+	ENSMUSG00000054766	Set	protein_coding	SET nuclear oncogene [Source:MGI Symbol;Acc:MGI:1860267]	56086	0.414091	6.28179	3.54358	0.000929999	0.013829
2	166906040	166946389	40350	+	ENSMUSG00000002718	Cse1l	protein_coding	chromosome segregation 1-like (S. cerevisiae) [Source:MGI Symbol;Acc:MGI:1339951]	110750	0.448986	6.21586	3.54024	0.000937787	0.0138909
2	32599709	32620806	21098	+	ENSMUSG00000026811	St6galnac6	protein_coding	ST6 (alpha-N-acetyl-neuraminyl-2,3-beta-galactosyl-1,3)-N-acetylgalactosaminide alpha-2,6-sialyltransferase 6 [Source:MGI Symbol;Acc:MGI:1355316]	50935	-0.910748	2.49205	-3.52433	0.00102066	0.0147267
2	26136814	26140521	3708	-	ENSMUSG00000087679	Tmem250-ps	protein_coding	transmembrane protein 250, pseudogene [Source:MGI Symbol;Acc:MGI:1924939]	109299	-0.502035	3.77755	-3.50424	0.00102316	0.0147419
2	117121374	117182279	60906	+	ENSMUSG00000027351	Spred1	protein_coding	sprouty protein with EVH-1 domain 1, related sequence [Source:MGI Symbol;Acc:MGI:2150016]	114715	-0.575069	3.8973	-3.48715	0.00106928	0.0151293
2	131186949	131198497	11549	+	ENSMUSG00000027330	Cdc25b	protein_coding	cell division cycle 25B [Source:MGI Symbol;Acc:MGI:99701]	12531	-1.39748	4.21273	-3.53522	0.00109589	0.0153565
2	28555795	28563403	7609	-	ENSMUSG00000026818	Cel	protein_coding	carboxyl ester lipase [Source:MGI Symbol;Acc:MGI:88374]	12613	-1.9199	-1.84032	-3.54448	0.00117622	0.0160419
2	157418444	157471862	53419	+	ENSMUSG00000027646	Src	protein_coding	Rous sarcoma oncogene [Source:MGI Symbol;Acc:MGI:98397]	20779	0.389203	6.96256	3.43836	0.0011949	0.0162244
2	28513125	28553081	39957	+	ENSMUSG00000026821	Ralgds	protein_coding	ral guanine nucleotide dissociation stimulator [Source:MGI Symbol;Acc:MGI:107485]	19730	0.41135	7.39604	3.42422	0.00123592	0.0165033
2	164839518	164857711	18194	-	ENSMUSG00000017754	Pltp	protein_coding	phospholipid transfer protein [Source:MGI Symbol;Acc:MGI:103151]	18830	0.483791	6.80543	3.40905	0.00128283	0.0168524
2	27886425	28039514	153090	+	ENSMUSG00000026837	Col5a1	protein_coding	collagen, type V, alpha 1 [Source:MGI Symbol;Acc:MGI:88457]	12831	-1.00457	5.3081	-3.43233	0.00129969	0.016963
2	119351229	119354381	3153	+	ENSMUSG00000027313	Chac1	protein_coding	ChaC, cation transport regulator 1 [Source:MGI Symbol;Acc:MGI:1916315]	69065	-1.39769	0.726885	-3.46579	0.00130024	0.016963
2	127740732	127788897	48166	-	ENSMUSG00000027378	Nphp1	protein_coding	nephronophthisis 1 (juvenile) homolog (human) [Source:MGI Symbol;Acc:MGI:1858233]	53885	-0.883355	1.38489	-3.41584	0.00132076	0.0171868
2	25428703	25448540	19838	+	ENSMUSG00000026944	Abca2	protein_coding	ATP-binding cassette, sub-family A (ABC1), member 2 [Source:MGI Symbol;Acc:MGI:99606]	11305	-0.943277	4.33742	-3.40213	0.00138123	0.0177325
2	93187548	93201759	14212	+	ENSMUSG00000068735	Trp53i11	protein_coding	transformation related protein 53 inducible protein 11 [Source:MGI Symbol;Acc:MGI:2670995]	277414	0.749051	6.66508	3.38638	0.00138597	0.0177636
2	138256565	138589292	332728	+	ENSMUSG00000062098	Btbd3	protein_coding	BTB (POZ) domain containing 3 [Source:MGI Symbol;Acc:MGI:2385155]	228662	-0.779038	6.45706	-3.34791	0.00152704	0.0190888
2	91211572	91236982	25411	-	ENSMUSG00000002109	Ddb2	protein_coding	damage specific DNA binding protein 2 [Source:MGI Symbol;Acc:MGI:1355314]	107986	-0.651092	1.00689	-3.33596	0.00154354	0.0192283
2	121008403	121016904	8502	+	ENSMUSG00000023572	Ccndbp1	protein_coding	cyclin D-type binding-protein 1 [Source:MGI Symbol;Acc:MGI:109595]	17151	-0.531455	4.66935	-3.31848	0.00159324	0.0195435
2	126890391	126933235	42845	-	ENSMUSG00000027366	Sppl2a	protein_coding	signal peptide peptidase like 2A [Source:MGI Symbol;Acc:MGI:1913802]	66552	-0.419835	5.18176	-3.30422	0.00164225	0.0198445
2	27079379	27108981	29603	+	ENSMUSG00000036040	Adamtsl2	protein_coding	ADAMTS-like 2 [Source:MGI Symbol;Acc:MGI:1925044]	77794	-1.31615	-0.992593	-3.36218	0.00164865	0.019862
2	31950139	31973442	23304	+	ENSMUSG00000001864	Aif1l	protein_coding	allograft inflammatory factor 1-like [Source:MGI Symbol;Acc:MGI:1919598]	108897	-0.819691	7.65157	-3.31761	0.0016538	0.0198819
2	181688419	181693977	5559	-	ENSMUSG00000002458	Rgs19	protein_coding	regulator of G-protein signaling 19 [Source:MGI Symbol;Acc:MGI:1915153]	56470	-0.899582	1.19058	-3.32142	0.00166406	0.0199737
2	84798828	84810335	11508	+	ENSMUSG00000027078	Ube2l6	protein_coding	ubiquitin-conjugating enzyme E2L 6 [Source:MGI Symbol;Acc:MGI:1914500]	56791	-1.51256	5.67227	-3.34961	0.00177019	0.0208112
2	150583080	150608567	25488	-	ENSMUSG00000033096	Apmap	protein_coding	adipocyte plasma membrane associated protein [Source:MGI Symbol;Acc:MGI:1919131]	71881	-0.786682	6.25573	-3.25036	0.00193123	0.0220572
2	24976033	25054057	78025	+	ENSMUSG00000036833	Pnpla7	protein_coding	patatin-like phospholipase domain containing 7 [Source:MGI Symbol;Acc:MGI:2385325]	241274	-0.55298	2.55669	-3.21205	0.00205114	0.0229782
2	146855864	146970097	114234	+	ENSMUSG00000074749	Kiz	protein_coding	kizuna centrosomal protein [Source:MGI Symbol;Acc:MGI:2684960]	228730	-0.448798	3.72547	-3.20878	0.00205687	0.0229782
2	22587291	22587962	672	-	ENSMUSG00000083863	Gm13341	unprocessed_pseudogene	predicted gene 13341 [Source:MGI Symbol;Acc:MGI:3650228]	NA	-0.862938	3.37145	-3.22856	0.00206489	0.0229899
2	113327736	113716767	389032	+	ENSMUSG00000044042	Fmn1	protein_coding	formin 1 [Source:MGI Symbol;Acc:MGI:101815]	14260	-0.506618	2.40753	-3.19632	0.00212234	0.0233785
2	26457903	26516663	58761	-	ENSMUSG00000026923	Notch1	protein_coding	notch 1 [Source:MGI Symbol;Acc:MGI:97363]	18128	-0.861122	2.44365	-3.2146	0.00213433	0.0234432
2	167095969	167190155	94187	-	ENSMUSG00000050556	Kcnb1	protein_coding	potassium voltage gated channel, Shab-related subfamily, member 1 [Source:MGI Symbol;Acc:MGI:96666]	16500	-0.926812	2.69459	-3.21844	0.00214452	0.0234809
2	32050055	32084857	34803	-	ENSMUSG00000050592	Fam78a	protein_coding	family with sequence similarity 78, member A [Source:MGI Symbol;Acc:MGI:2443569]	241303	2.01982	1.79798	3.30215	0.00217095	0.0236752
2	173224458	173276533	52076	-	ENSMUSG00000038400	Pmepa1	protein_coding	prostate transmembrane protein, androgen induced 1 [Source:MGI Symbol;Acc:MGI:1929600]	65112	-0.396509	6.92123	-3.17646	0.00221673	0.0239528
2	24367580	24414954	47375	+	ENSMUSG00000026979	Psd4	protein_coding	pleckstrin and Sec7 domain containing 4 [Source:MGI Symbol;Acc:MGI:2674093]	215632	0.769091	6.25204	3.19067	0.00221956	0.0239547
2	139256876	139677714	420839	-	ENSMUSG00000085071	Gm14066	processed_transcript	predicted gene 14066 [Source:MGI Symbol;Acc:MGI:3649728]	NA	2.96146	-1.11783	3.31261	0.00235596	0.0249889
2	181018380	181043546	25167	-	ENSMUSG00000027577	Chrna4	protein_coding	cholinergic receptor, nicotinic, alpha polypeptide 4 [Source:MGI Symbol;Acc:MGI:87888]	11438	-0.782557	3.16274	-3.15153	0.00244232	0.0255335
2	167932057	167979385	47329	+	ENSMUSG00000027540	Ptpn1	protein_coding	protein tyrosine phosphatase, non-receptor type 1 [Source:MGI Symbol;Acc:MGI:97805]	19246	-0.446098	5.52886	-3.12939	0.00247656	0.0257509
2	131909928	131938429	28502	+	ENSMUSG00000079037	Prnp	protein_coding	prion protein [Source:MGI Symbol;Acc:MGI:97769]	19122	-0.634444	8.19736	-3.13164	0.00249871	0.0258932
2	73429610	73529734	100125	-	ENSMUSG00000075284	Wipf1	protein_coding	WAS/WASL interacting protein family, member 1 [Source:MGI Symbol;Acc:MGI:2178801]	215280	0.50545	5.36836	3.12283	0.00252078	0.0260164
2	49619298	49774778	155481	+	ENSMUSG00000026764	Kif5c	protein_coding	kinesin family member 5C [Source:MGI Symbol;Acc:MGI:1098269]	16574	0.598645	4.05263	3.11989	0.00255769	0.026222
2	34983331	35061438	78108	-	ENSMUSG00000026874	Hc	protein_coding	hemolytic complement [Source:MGI Symbol;Acc:MGI:96031]	15139	-1.51032	0.652431	-3.19141	0.0026064	0.0266131
2	60417543	60553308	135766	-	ENSMUSG00000054580	Pla2r1	protein_coding	phospholipase A2 receptor 1 [Source:MGI Symbol;Acc:MGI:102468]	18779	-1.2007	3.60545	-3.14002	0.00276081	0.027547
2	5137776	5230878	93103	+	ENSMUSG00000026676	Ccdc3	protein_coding	coiled-coil domain containing 3 [Source:MGI Symbol;Acc:MGI:1921436]	74186	-0.806227	2.00671	-3.07879	0.00291671	0.0287097
2	164354070	164389095	35026	-	ENSMUSG00000017002	Slpi	protein_coding	secretory leukocyte peptidase inhibitor [Source:MGI Symbol;Acc:MGI:109297]	20568	-0.983478	2.81093	-3.09023	0.00295577	0.029001
2	180499976	180544980	45005	+	ENSMUSG00000027568	Ntsr1	protein_coding	neurotensin receptor 1 [Source:MGI Symbol;Acc:MGI:97386]	18216	-1.05981	2.9673	-3.08967	0.00301476	0.0294185
2	29869164	29882840	13677	+	ENSMUSG00000039787	Cercam	protein_coding	cerebral endothelial cell adhesion molecule [Source:MGI Symbol;Acc:MGI:2139134]	99151	-1.1651	2.96866	-3.08624	0.00311791	0.0300717
2	122028546	122056598	28053	+	ENSMUSG00000027236	Eif3j1	protein_coding	eukaryotic translation initiation factor 3, subunit J1 [Source:MGI Symbol;Acc:MGI:1925905]	78655	0.342826	5.54601	3.02732	0.00313485	0.0301781
2	122594467	122611303	16837	-	ENSMUSG00000027199	Gatm	protein_coding	glycine amidinotransferase (L-arginine:glycine amidinotransferase) [Source:MGI Symbol;Acc:MGI:1914342]	67092	-1.03595	6.7988	-3.06909	0.00314933	0.0302765
2	164769898	164778822	8925	+	ENSMUSG00000001403	Ube2c	protein_coding	ubiquitin-conjugating enzyme E2C [Source:MGI Symbol;Acc:MGI:1915862]	68612	-0.995219	2.94437	-3.04873	0.00327404	0.0310731
2	168180986	168207112	26127	-	ENSMUSG00000051149	Adnp	protein_coding	activity-dependent neuroprotective protein [Source:MGI Symbol;Acc:MGI:1338758]	11538	0.776287	0.834874	3.01585	0.00336353	0.0315274
2	157015799	157079254	63456	-	ENSMUSG00000055485	Soga1	protein_coding	suppressor of glucose, autophagy associated 1 [Source:MGI Symbol;Acc:MGI:2444575]	320706	0.526055	5.75693	2.99318	0.0034127	0.0318956
2	118528757	118549687	20931	-	ENSMUSG00000040093	Bmf	protein_coding	BCL2 modifying factor [Source:MGI Symbol;Acc:MGI:2176433]	171543	-0.500043	3.99306	-2.98369	0.00348178	0.0323131
2	166805588	166898052	92465	+	ENSMUSG00000074582	Arfgef2	protein_coding	ADP-ribosylation factor guanine nucleotide-exchange factor 2 (brefeldin A-inhibited) [Source:MGI Symbol;Acc:MGI:2139354]	99371	0.335678	6.47308	2.96918	0.00358441	0.0329525
2	27262104	27427033	164930	-	ENSMUSG00000009621	Vav2	protein_coding	vav 2 oncogene [Source:MGI Symbol;Acc:MGI:102718]	22325	0.483367	4.86953	2.96636	0.00362023	0.0331228
2	31813290	31846005	32716	-	ENSMUSG00000026841	Fibcd1	protein_coding	fibrinogen C domain containing 1 [Source:MGI Symbol;Acc:MGI:2138953]	98970	2.23843	-2.19542	3.07322	0.00391219	0.0347339
2	152143561	152149097	5537	+	ENSMUSG00000068079	Tcf15	protein_coding	transcription factor 15 [Source:MGI Symbol;Acc:MGI:104664]	21407	-1.0499	-0.813574	-2.97963	0.00391557	0.0347339
2	160906437	160912328	5892	-	ENSMUSG00000050700	Emilin3	protein_coding	elastin microfibril interfacer 3 [Source:MGI Symbol;Acc:MGI:2389142]	280635	1.71453	0.961082	3.03705	0.00394471	0.0348628
2	153779931	153844751	64821	+	ENSMUSG00000044083	Efcab8	protein_coding	EF-hand calcium binding domain 8 [Source:MGI Symbol;Acc:MGI:3644206]	100504221	2.12062	1.01877	3.06223	0.00395569	0.0349195
2	119618298	119651244	32947	+	ENSMUSG00000027306	Nusap1	protein_coding	nucleolar and spindle associated protein 1 [Source:MGI Symbol;Acc:MGI:2675669]	108907	-1.11121	2.27143	-2.93928	0.00437974	0.0374639
2	74679557	74687016	7460	+	ENSMUSG00000042499	Hoxd11	protein_coding	homeobox D11 [Source:MGI Symbol;Acc:MGI:96203]	15431	-1.68767	-1.97947	-2.97181	0.00459661	0.0387461
2	122147686	122153083	5398	+	ENSMUSG00000060802	B2m	protein_coding	beta-2 microglobulin [Source:MGI Symbol;Acc:MGI:88127]	12010	-0.804326	9.47837	-2.8854	0.00460053	0.0387551
2	125563088	125625113	62026	-	ENSMUSG00000068394	Cep152	protein_coding	centrosomal protein 152 [Source:MGI Symbol;Acc:MGI:2139083]	99100	0.637613	1.97555	2.86613	0.00464326	0.0389677
2	71117923	71142926	25004	+	ENSMUSG00000027015	Cybrd1	protein_coding	cytochrome b reductase 1 [Source:MGI Symbol;Acc:MGI:2654575]	73649	-1.02515	1.24332	-2.89647	0.00474384	0.0395949
2	127791388	127792488	1101	-	ENSMUSG00000051319	Mtln	protein_coding	mitoregulin [Source:MGI Symbol;Acc:MGI:1915135]	NA	-0.794367	1.07386	-2.87103	0.00474653	0.0395957
2	28506095	28507773	1679	+	ENSMUSG00000063611	Gm10134	lincRNA	predicted gene 10134 [Source:MGI Symbol;Acc:MGI:3642322]	NA	-1.05322	-0.465204	-2.89755	0.00476654	0.0396222
2	3114224	3227806	113583	+	ENSMUSG00000050530	Fam171a1	protein_coding	family with sequence similarity 171, member A1 [Source:MGI Symbol;Acc:MGI:2442917]	269233	0.409663	6.34365	2.83682	0.00485491	0.0400314
2	24186476	24193568	7093	+	ENSMUSG00000044103	Il1f9	protein_coding	interleukin 1 family, member 9 [Source:MGI Symbol;Acc:MGI:2449929]	215257	-1.9059	-1.01385	-2.94864	0.00504389	0.0410273
2	32308471	32353338	44868	-	ENSMUSG00000026825	Dnm1	protein_coding	dynamin 1 [Source:MGI Symbol;Acc:MGI:107384]	13429	-0.909173	2.86666	-2.85649	0.0050575	0.0410725
2	33641193	33646354	5162	+	ENSMUSG00000052951	C130021I20Rik	antisense	Riken cDNA C130021I20 gene [Source:MGI Symbol;Acc:MGI:3639863]	NA	0.74601	0.355035	2.8331	0.00512627	0.0413885
2	151842927	151874668	31742	+	ENSMUSG00000032852	Rspo4	protein_coding	R-spondin 4 [Source:MGI Symbol;Acc:MGI:1924467]	228770	-1.21256	-1.06144	-2.88065	0.00516845	0.0416278
2	30713147	30720057	6911	-	ENSMUSG00000075416	Gm14488	processed_transcript	predicted gene 14488 [Source:MGI Symbol;Acc:MGI:3649725]	NA	-1.44285	-1.44791	-2.89468	0.00527184	0.0422519
2	174110349	174123070	12722	+	ENSMUSG00000039263	Npepl1	protein_coding	aminopeptidase-like 1 [Source:MGI Symbol;Acc:MGI:2448523]	228961	0.352222	6.4025	2.78908	0.00540414	0.0429973
2	84765387	84775444	10058	-	ENSMUSG00000023224	Serping1	protein_coding	serine (or cysteine) peptidase inhibitor, clade G, member 1 [Source:MGI Symbol;Acc:MGI:894696]	12258	-1.37951	7.15166	-2.85218	0.00575582	0.0449547
2	181147653	181157014	9362	-	ENSMUSG00000016349	Eef1a2	protein_coding	eukaryotic translation elongation factor 1 alpha 2 [Source:MGI Symbol;Acc:MGI:1096317]	13628	-2.14425	-1.14802	-2.90576	0.00578741	0.0450864
2	53134704	53191702	56999	-	ENSMUSG00000061136	Prpf40a	protein_coding	pre-mRNA processing factor 40A [Source:MGI Symbol;Acc:MGI:1860512]	56194	0.344808	5.96804	2.73602	0.00608952	0.0466102
2	167553314	167607845	54532	+	ENSMUSG00000085596	Gm11476	processed_transcript	predicted gene 11476 [Source:MGI Symbol;Acc:MGI:3705135]	NA	1.04512	0.536273	2.79145	0.00611728	0.0467348
2	103762941	103797649	34709	-	ENSMUSG00000027184	Caprin1	protein_coding	cell cycle associated protein 1 [Source:MGI Symbol;Acc:MGI:1858234]	53872	0.319605	8.18516	2.73344	0.0061241	0.0467348
2	14735546	14737927	2382	-	ENSMUSG00000103050	Gm38273	TEC	predicted gene, 38273 [Source:MGI Symbol;Acc:MGI:5611501]	NA	2.02348	-1.02729	2.86599	0.0062605	0.0473744
2	164805098	164822130	17033	+	ENSMUSG00000045822	Zswim3	protein_coding	zinc finger SWIM-type containing 3 [Source:MGI Symbol;Acc:MGI:1914788]	67538	0.466208	3.6782	2.6938	0.00672306	0.0495765
1	24613189	24613971	783	-	ENSMUSG00000101111	Gm28437	unprocessed_pseudogene	predicted gene 28437 [Source:MGI Symbol;Acc:MGI:5579143]	NA	-1.23508	2.35382	-7.10099	2.28193e-07	0.000282757
1	14168954	14310235	141282	-	ENSMUSG00000025932	Eya1	protein_coding	EYA transcriptional coactivator and phosphatase 1 [Source:MGI Symbol;Acc:MGI:109344]	14048	1.60043	1.20568	7.09377	2.4e-07	0.000282757
1	40225080	40317257	92178	+	ENSMUSG00000026072	Il1r1	protein_coding	interleukin 1 receptor, type I [Source:MGI Symbol;Acc:MGI:96545]	16177	1.23763	4.29666	6.76096	4.81927e-07	0.000400183
1	24615706	24616197	492	-	ENSMUSG00000101249	Gm29216	unprocessed_pseudogene	predicted gene 29216 [Source:MGI Symbol;Acc:MGI:5579922]	NA	-1.35683	2.74008	-5.98114	2.86949e-06	0.000706661
1	136213531	136234264	20734	-	ENSMUSG00000041605	Inava	protein_coding	innate immunity activator [Source:MGI Symbol;Acc:MGI:1921579]	67313	-1.03634	3.99354	-5.96364	2.89815e-06	0.000706661
1	180976210	181020904	44695	-	ENSMUSG00000038776	Ephx1	protein_coding	epoxide hydrolase 1, microsomal [Source:MGI Symbol;Acc:MGI:95405]	13849	-1.49134	3.22131	-5.92755	3.30234e-06	0.000722552
1	160044382	160080208	35827	+	ENSMUSG00000090394	4930523C07Rik	protein_coding	RIKEN cDNA 4930523C07 gene [Source:MGI Symbol;Acc:MGI:1914897]	67647	-1.36089	3.26991	-5.84011	3.98869e-06	0.000766029
1	188262023	188965041	703019	+	ENSMUSG00000026609	Ush2a	protein_coding	usherin [Source:MGI Symbol;Acc:MGI:1341292]	22283	1.23239	1.07542	5.69705	5.50035e-06	0.000856545
1	164048234	164057677	9444	+	ENSMUSG00000026582	Sele	protein_coding	selectin, endothelial cell [Source:MGI Symbol;Acc:MGI:98278]	20339	0.892197	4.32569	5.44698	9.63533e-06	0.00115293
1	51465862	51478425	12564	-	ENSMUSG00000026107	Nabp1	protein_coding	nucleic acid binding protein 1 [Source:MGI Symbol;Acc:MGI:1923258]	109019	0.661436	5.52691	5.3107	1.31845e-05	0.00138762
1	74713574	74737892	24319	+	ENSMUSG00000026170	Cyp27a1	protein_coding	cytochrome P450, family 27, subfamily a, polypeptide 1 [Source:MGI Symbol;Acc:MGI:88594]	104086	-1.04755	1.92194	-5.28314	1.44086e-05	0.00146199
1	188971095	189007841	36747	-	ENSMUSG00000026608	Kctd3	protein_coding	potassium channel tetramerisation domain containing 3 [Source:MGI Symbol;Acc:MGI:2444629]	226823	0.557169	5.91678	5.22869	1.60008e-05	0.00149811
1	24613974	24614651	678	-	ENSMUSG00000100862	Gm10925	unprocessed_pseudogene	predicted gene 10925 [Source:MGI Symbol;Acc:MGI:3809095]	NA	-1.22641	3.24214	-5.15207	2.01299e-05	0.00170077
1	169949535	169969241	19707	-	ENSMUSG00000026675	Hsd17b7	protein_coding	hydroxysteroid (17-beta) dehydrogenase 7 [Source:MGI Symbol;Acc:MGI:1330808]	15490	1.65783	4.69827	5.15249	2.13343e-05	0.00171117
1	191325912	191350914	25003	+	ENSMUSG00000026627	Pacc1	protein_coding	proton activated chloride channel 1 [Source:MGI Symbol;Acc:MGI:1914200]	66950	-0.646234	3.37865	-4.94672	3.14725e-05	0.00206881
1	171270328	171276896	6569	+	ENSMUSG00000052423	B4galt3	protein_coding	UDP-Gal:betaGlcNAc beta 1,4-galactosyltransferase, polypeptide 3 [Source:MGI Symbol;Acc:MGI:1928767]	57370	0.602431	4.31598	4.75175	5.02955e-05	0.0026563
1	172520801	172545870	25070	+	ENSMUSG00000026546	Cfap45	protein_coding	cilia and flagella associated protein 45 [Source:MGI Symbol;Acc:MGI:1919120]	71870	-1.29946	-0.202984	-4.74448	5.46578e-05	0.00276284
1	24614885	24615565	681	-	ENSMUSG00000102070	Gm28661	unprocessed_pseudogene	predicted gene 28661 [Source:MGI Symbol;Acc:MGI:5579367]	NA	-1.25315	2.44491	-4.71853	5.78452e-05	0.00287841
1	165174337	165194438	20102	-	ENSMUSG00000040848	Sft2d2	protein_coding	SFT2 domain containing 2 [Source:MGI Symbol;Acc:MGI:1917362]	108735	-0.909177	5.04201	-4.63396	6.80988e-05	0.00312276
1	159523769	159931729	407961	+	ENSMUSG00000015829	Tnr	protein_coding	tenascin R [Source:MGI Symbol;Acc:MGI:99516]	21960	-2.07616	-0.244587	-4.60769	8.59114e-05	0.00366523
1	130731976	130744622	12647	+	ENSMUSG00000042510	AA986860	protein_coding	expressed sequence AA986860 [Source:MGI Symbol;Acc:MGI:2138143]	212439	-0.740775	3.68041	-4.49439	9.43124e-05	0.0038935
1	190947646	190979296	31651	-	ENSMUSG00000037568	Vash2	protein_coding	vasohibin 2 [Source:MGI Symbol;Acc:MGI:2444826]	226841	1.27424	4.12397	4.51762	9.49139e-05	0.0039078
1	71888112	71891204	3093	+	ENSMUSG00000099707	Gm8883	lincRNA	predicted gene 8883 [Source:MGI Symbol;Acc:MGI:3649116]	NA	-1.07683	2.57593	-4.45803	0.000106699	0.00416107
1	86666291	86670571	4281	-	ENSMUSG00000026241	Nppc	protein_coding	natriuretic peptide type C [Source:MGI Symbol;Acc:MGI:97369]	18159	1.10861	3.72003	4.40045	0.000123417	0.00441649
1	75198236	75210813	12578	-	ENSMUSG00000026200	Glb1l	protein_coding	galactosidase, beta 1-like [Source:MGI Symbol;Acc:MGI:1921827]	74577	-0.758347	1.87902	-4.35355	0.000132976	0.00461827
1	133619940	133661318	41379	-	ENSMUSG00000094410	Gm38394	protein_coding	predicted gene, 38394 [Source:MGI Symbol;Acc:MGI:5614057]	667118	0.897624	3.85576	4.31657	0.000147415	0.00491899
1	39665301	39720997	55697	-	ENSMUSG00000057173	Rfx8	protein_coding	regulatory factor X 8 [Source:MGI Symbol;Acc:MGI:3588206]	619289	-2.0719	-0.507932	-4.36578	0.000156301	0.00509341
1	172261641	172319841	58201	+	ENSMUSG00000038034	Igsf8	protein_coding	immunoglobulin superfamily, member 8 [Source:MGI Symbol;Acc:MGI:2154090]	140559	0.692883	6.86267	4.27048	0.000162049	0.00516732
1	131638306	131675505	37200	+	ENSMUSG00000004552	Ctse	protein_coding	cathepsin E [Source:MGI Symbol;Acc:MGI:107361]	13034	-1.32704	1.99753	-4.25621	0.000182187	0.00556962
1	71709705	71710055	351	-	ENSMUSG00000101834	Gm5829	processed_pseudogene	predicted gene 5829 [Source:MGI Symbol;Acc:MGI:3644438]	NA	1.61415	0.924911	4.23651	0.000200769	0.00584884
1	180800832	180813943	13112	-	ENSMUSG00000060743	H3f3a	protein_coding	H3.3 histone A [Source:MGI Symbol;Acc:MGI:1097686]	15078	-0.574468	6.42414	-4.13653	0.000223197	0.00628194
1	181896384	182019990	123607	-	ENSMUSG00000022995	Enah	protein_coding	ENAH actin regulator [Source:MGI Symbol;Acc:MGI:108360]	13800	0.509335	5.8111	4.11392	0.000235439	0.00640495
1	79794197	79861180	66984	-	ENSMUSG00000026249	Serpine2	protein_coding	serine (or cysteine) peptidase inhibitor, clade E, member 2 [Source:MGI Symbol;Acc:MGI:101780]	20720	-0.990373	8.35171	-4.12866	0.000236228	0.00641501
1	135253575	135258568	4994	-	ENSMUSG00000003051	Elf3	protein_coding	E74-like factor 3 [Source:MGI Symbol;Acc:MGI:1101781]	13710	-0.787178	5.65737	-4.10698	0.000242977	0.0065143
1	93685660	93695764	10105	+	ENSMUSG00000026278	Bok	protein_coding	BCL2-related ovarian killer [Source:MGI Symbol;Acc:MGI:1858494]	51800	-0.783352	6.17666	-4.09748	0.000248573	0.00654984
1	171229572	171234365	4794	-	ENSMUSG00000058715	Fcer1g	protein_coding	Fc receptor, IgE, high affinity I, gamma polypeptide [Source:MGI Symbol;Acc:MGI:95496]	14127	-0.918433	4.06881	-4.03465	0.000294369	0.00715643
1	150100031	150108227	8197	+	ENSMUSG00000032487	Ptgs2	protein_coding	prostaglandin-endoperoxide synthase 2 [Source:MGI Symbol;Acc:MGI:97798]	19225	-1.24762	4.8752	-4.01254	0.0003279	0.00770262
1	133250398	133269808	19411	-	ENSMUSG00000101693	Gm19461	antisense	predicted gene, 19461 [Source:MGI Symbol;Acc:MGI:5011646]	NA	1.44646	-0.770128	3.98874	0.000360424	0.00811673
1	178187417	178257301	69885	+	ENSMUSG00000026502	Desi2	protein_coding	desumoylating isopeptidase 2 [Source:MGI Symbol;Acc:MGI:1926075]	78825	0.629502	2.43773	3.88401	0.000412582	0.00877653
1	133382303	133424377	42075	-	ENSMUSG00000070643	Sox13	protein_coding	SRY (sex determining region Y)-box 13 [Source:MGI Symbol;Acc:MGI:98361]	20668	-0.778573	4.36917	-3.85772	0.000445311	0.0092043
1	191005847	191026158	20312	-	ENSMUSG00000066595	Flvcr1	protein_coding	feline leukemia virus subgroup C cellular receptor 1 [Source:MGI Symbol;Acc:MGI:2444881]	226844	0.636488	4.19438	3.83593	0.000463686	0.00943136
1	172500047	172507380	7334	+	ENSMUSG00000026547	Tagln2	protein_coding	transgelin 2 [Source:MGI Symbol;Acc:MGI:1312985]	21346	0.469312	9.15012	3.82229	0.000476446	0.00953889
[truncated: 86 more rows]

## Sheet: 2_M_Plac_DEGs P<0.05
Supplementary File 1B: Differential Gene Expression Analysis Male Eed Homozygous Placenta vs Eed Heterozygous Placenta (No FDR; P<0.05)
This sheet contains Male Eed Placenta DEGs (HOM vs HET; P < 0.05)
chr	start	end	width	strand	gene_id	gene_name	gene_biotype	description	entrezid	logFC	AveExpr	t	P.Value	adj.P.Val
5	137166892	137177043	10152	-	ENSMUSG00000118522	CAAA01077340.1	protein_coding	predicted, 31160 [Source:NCBI gene;Acc:102633301]	102633301	-1.58488	1.70007	-6.2485	1.58918e-06	0.0243399
12	16535669	16646966	111298	-	ENSMUSG00000020593	Lpin1	protein_coding	lipin 1 [Source:MGI Symbol;Acc:MGI:1891340]	14245	-0.795394	4.04981	-4.16468	0.000211274	0.972077
16	17489611	17507485	17875	+	ENSMUSG00000022763	Aifm3	protein_coding	apoptosis-inducing factor, mitochondrion-associated 3 [Source:MGI Symbol;Acc:MGI:1919418]	72168	-0.970578	2.61208	-4.1406	0.000228779	0.972077
13	52583173	52648792	65620	+	ENSMUSG00000021457	Syk	protein_coding	spleen tyrosine kinase [Source:MGI Symbol;Acc:MGI:99515]	20963	-0.720518	4.00259	-4.02155	0.000297369	0.972077
1	24613189	24613971	783	-	ENSMUSG00000101111	Gm28437	unprocessed_pseudogene	predicted gene 28437 [Source:MGI Symbol;Acc:MGI:5579143]	NA	-0.906544	2.35382	-3.92407	0.000385082	0.972077
7	56716465	57387188	670724	-	ENSMUSG00000055026	Gabrg3	protein_coding	gamma-aminobutyric acid (GABA) A receptor, subunit gamma 3 [Source:MGI Symbol;Acc:MGI:95624]	14407	3.69237	-3.20453	4.0426	0.000410634	0.972077
12	8764901	8771181	6281	-	ENSMUSG00000096940	Gm4755	bidirectional_promoter_lncRNA	predicted gene 4755 [Source:MGI Symbol;Acc:MGI:3779434]	NA	-1.42279	-0.472248	-3.89111	0.00045703	0.972077
13	28142484	28151611	9128	+	ENSMUSG00000017064	Prl5a1	protein_coding	prolactin family 5, subfamily a, member 1 [Source:MGI Symbol;Acc:MGI:106332]	28078	-1.73708	6.35256	-3.79734	0.000609799	0.972077
7	30421732	30428746	7015	+	ENSMUSG00000036931	Nfkbid	protein_coding	nuclear factor of kappa light polypeptide gene enhancer in B cells inhibitor, delta [Source:MGI Symbol;Acc:MGI:3041243]	243910	1.63459	-1.47023	3.76391	0.000650922	0.972077
11	106318592	106353288	34697	-	ENSMUSG00000001027	Scn4a	protein_coding	sodium channel, voltage-gated, type IV, alpha [Source:MGI Symbol;Acc:MGI:98250]	110880	-1.40649	-1.21095	-3.73011	0.000678594	0.972077
6	128843786	128846959	3174	-	ENSMUSG00000108095	Gm44067	lincRNA	predicted gene, 44067 [Source:MGI Symbol;Acc:MGI:5690459]	NA	1.90966	-1.73369	3.70871	0.00078159	0.972077
17	12318853	12327250	8398	+	ENSMUSG00000097350	4732491K20Rik	bidirectional_promoter_lncRNA	RIKEN cDNA 4732491K20 gene [Source:MGI Symbol;Acc:MGI:3026975]	NA	1.08276	-0.495339	3.63807	0.000798957	0.972077
3	90692632	90695721	3090	-	ENSMUSG00000056071	S100a9	protein_coding	S100 calcium binding protein A9 (calgranulin B) [Source:MGI Symbol;Acc:MGI:1338947]	20202	1.25212	1.40228	3.60384	0.000898833	0.972077
6	55451978	55501451	49474	+	ENSMUSG00000029778	Adcyap1r1	protein_coding	adenylate cyclase activating polypeptide 1 receptor 1 [Source:MGI Symbol;Acc:MGI:108449]	11517	-1.0723	2.49029	-3.56718	0.000948371	0.972077
18	61045150	61085061	39912	+	ENSMUSG00000024620	Pdgfrb	protein_coding	platelet derived growth factor receptor, beta polypeptide [Source:MGI Symbol;Acc:MGI:97531]	18596	-0.582876	7.65906	-3.5314	0.000962318	0.972077
9	48132504	48158965	26462	-	ENSMUSG00000110924	Gm40518	lincRNA	predicted gene, 40518 [Source:MGI Symbol;Acc:MGI:5623403]	NA	1.35728	0.534033	3.48185	0.00123965	0.972077
5	33983433	33985013	1581	+	ENSMUSG00000070858	Gm1673	protein_coding	predicted gene 1673 [Source:MGI Symbol;Acc:MGI:2686519]	381633	1.06921	0.0193118	3.45088	0.00125905	0.972077
1	38863867	38898161	34295	-	ENSMUSG00000026080	Chst10	protein_coding	carbohydrate sulfotransferase 10 [Source:MGI Symbol;Acc:MGI:2138283]	98388	1.85835	-1.262	3.48959	0.00133404	0.972077
10	81459227	81482709	23483	-	ENSMUSG00000034818	Celf5	protein_coding	CUGBP, Elav-like family member 5 [Source:MGI Symbol;Acc:MGI:2442333]	319586	2.94576	-2.33989	3.52642	0.00139123	0.972077
7	29303951	29318243	14293	+	ENSMUSG00000030584	Dpf1	protein_coding	D4, zinc and double PHD fingers family 1 [Source:MGI Symbol;Acc:MGI:1352748]	29861	1.07382	-0.628972	3.3832	0.00148618	0.972077
11	107732357	107794557	62201	-	ENSMUSG00000020723	Cacng4	protein_coding	calcium channel, voltage-dependent, gamma subunit 4 [Source:MGI Symbol;Acc:MGI:1859167]	54377	1.29077	0.949371	3.4022	0.00148664	0.972077
5	90891241	90893115	1875	+	ENSMUSG00000029380	Cxcl1	protein_coding	chemokine (C-X-C motif) ligand 1 [Source:MGI Symbol;Acc:MGI:108068]	14825	1.90485	-0.518194	3.41968	0.0015972	0.972077
7	45783738	45804144	20407	+	ENSMUSG00000062044	Lmtk3	protein_coding	lemur tyrosine kinase 3 [Source:MGI Symbol;Acc:MGI:3039582]	381983	1.8243	-0.520472	3.40849	0.00162055	0.972077
5	72300025	72504473	204449	-	ENSMUSG00000005220	Corin	protein_coding	corin, serine peptidase [Source:MGI Symbol;Acc:MGI:1349451]	53419	-0.753939	5.07735	-3.31572	0.00164274	0.972077
6	76881637	77979699	1098063	-	ENSMUSG00000063063	Ctnna2	protein_coding	catenin (cadherin associated protein), alpha 2 [Source:MGI Symbol;Acc:MGI:88275]	12386	2.69102	-2.04042	3.44833	0.00164588	0.972077
7	98051060	98119524	68465	-	ENSMUSG00000030761	Myo7a	protein_coding	myosin VIIA [Source:MGI Symbol;Acc:MGI:104510]	17921	-0.695961	4.51957	-3.31024	0.00165017	0.972077
13	62772200	62785808	13609	-	ENSMUSG00000091183	Gm5141	protein_coding	predicted gene 5141 [Source:MGI Symbol;Acc:MGI:3779466]	380850	1.86086	-1.29043	3.31213	0.00206663	0.999994
13	27094190	27100258	6069	+	ENSMUSG00000057170	Prl3d1	protein_coding	prolactin family 3, subfamily d, member 1 [Source:MGI Symbol;Acc:MGI:97606]	18775	0.972806	5.38204	3.23366	0.00208847	0.999994
12	81717830	81720052	2223	-	ENSMUSG00000113184	Gm49654	lincRNA	predicted gene, 49654 [Source:MGI Symbol;Acc:MGI:6215088]	NA	1.19052	0.440184	3.2462	0.0021286	0.999994
6	71293765	71302880	9116	+	ENSMUSG00000073018	Gm1070	transcribed_unprocessed_pseudogene	predicted gene 1070 [Source:MGI Symbol;Acc:MGI:2685916]	381785	0.779281	0.112131	3.16486	0.00236463	0.999994
MT	8607	9390	784	+	ENSMUSG00000064358	mt-Co3	protein_coding	mitochondrially encoded cytochrome c oxidase III [Source:MGI Symbol;Acc:MGI:102502]	17710	-0.828381	2.56462	-3.16646	0.00237857	0.999994
7	18718090	18727248	9159	+	ENSMUSG00000044903	Psg22	protein_coding	pregnancy-specific glycoprotein 22 [Source:MGI Symbol;Acc:MGI:1891354]	243862	-0.914606	8.08557	-3.12589	0.0026703	0.999994
7	6343759	6355956	12198	+	ENSMUSG00000109398	Gm3854	protein_coding	predicted gene 3854 [Source:MGI Symbol;Acc:MGI:3782026]	NA	1.63165	-1.97092	3.18712	0.00269668	0.999994
1	24615706	24616197	492	-	ENSMUSG00000101249	Gm29216	unprocessed_pseudogene	predicted gene 29216 [Source:MGI Symbol;Acc:MGI:5579922]	NA	-1.00167	2.74008	-3.12896	0.00270504	0.999994
13	104945904	105054930	109027	-	ENSMUSG00000021719	Rgs7bp	protein_coding	regulator of G-protein signalling 7 binding protein [Source:MGI Symbol;Acc:MGI:106334]	52882	1.19322	-0.462073	3.14569	0.00271841	0.999994
17	47726842	47734482	7641	+	ENSMUSG00000023987	Pgc	protein_coding	progastricsin (pepsinogen C) [Source:MGI Symbol;Acc:MGI:98909]	109820	-1.11006	5.66543	-3.13373	0.00274394	0.999994
11	32286965	32287784	820	+	ENSMUSG00000073063	Hbq1b	protein_coding	hemoglobin, theta 1B [Source:MGI Symbol;Acc:MGI:3613460]	544763	-2.26261	-0.97567	-3.20286	0.00286258	0.999994
12	3962554	4038915	76362	-	ENSMUSG00000020658	Efr3b	protein_coding	EFR3 homolog B [Source:MGI Symbol;Acc:MGI:2444851]	668212	-0.533491	5.58863	-3.04648	0.00301748	0.999994
11	79526560	79530609	4050	-	ENSMUSG00000078771	Evi2a	protein_coding	ecotropic viral integration site 2a [Source:MGI Symbol;Acc:MGI:95458]	14017	1.78671	-1.74439	3.14667	0.00306032	0.999994
18	22693181	23041653	348473	-	ENSMUSG00000041923	Nol4	protein_coding	nucleolar protein 4 [Source:MGI Symbol;Acc:MGI:2441684]	319211	2.67528	-2.60639	3.19266	0.00307438	0.999994
8	36094828	36147787	52960	+	ENSMUSG00000050271	Prag1	protein_coding	PEAK1 related kinase activating pseudokinase 1 [Source:MGI Symbol;Acc:MGI:1196223]	244418	-0.662779	4.29497	-3.02559	0.00321792	0.999994
1	71888112	71891204	3093	+	ENSMUSG00000099707	Gm8883	lincRNA	predicted gene 8883 [Source:MGI Symbol;Acc:MGI:3649116]	NA	-0.884736	2.57593	-3.02812	0.00334831	0.999994
[truncated: 436 more rows]

## Sheet: 3_F_Plac_DEGs P<0.05
Supplementary File 1C: Differential Gene Expression Analysis Female Eed Homozygous Placenta vs Eed Heterozygous Placenta (No FDR; P<0.05)
[truncated: 3,966 more rows]

## Sheet: 4_M-F_Common P<0.05
Supplementary File 1D: Genes Commonly Differentially Expressed in Male and Female Eed Homozygous Placenta vs Eed Heterozygous Placenta (No FDR; P<0.05)
[truncated: 229 more rows]

[truncated: 9 more sheets: 5_F_Plac_DEGs FDR<05 v ScRNAseq, 6_F_Plac_DEGs FDR<05 v Imprinte, 7_F_Plac_DEGs_Enrichment chrom, 8_F_PlacDMRs HEThet vs HEThom, 9_F_PlacDMRs WTwt vs HEThom, 10_F_PlacDMRs WT-wt vs HET-het, 11_F_Hethom v HEThet Metabolite, 12_F_Hethom v WTwt Metabolites, 13_M_Hethom v WTwt Metabolites]
