# Supplementary figures and images for: Fetal growth delay caused by loss of non-canonical imprinting is resolved late in pregnancy and culminates in offspring overgrowth
Source: eLife journal article supplement (doi:10.7554/elife.81875), 2024-05-07

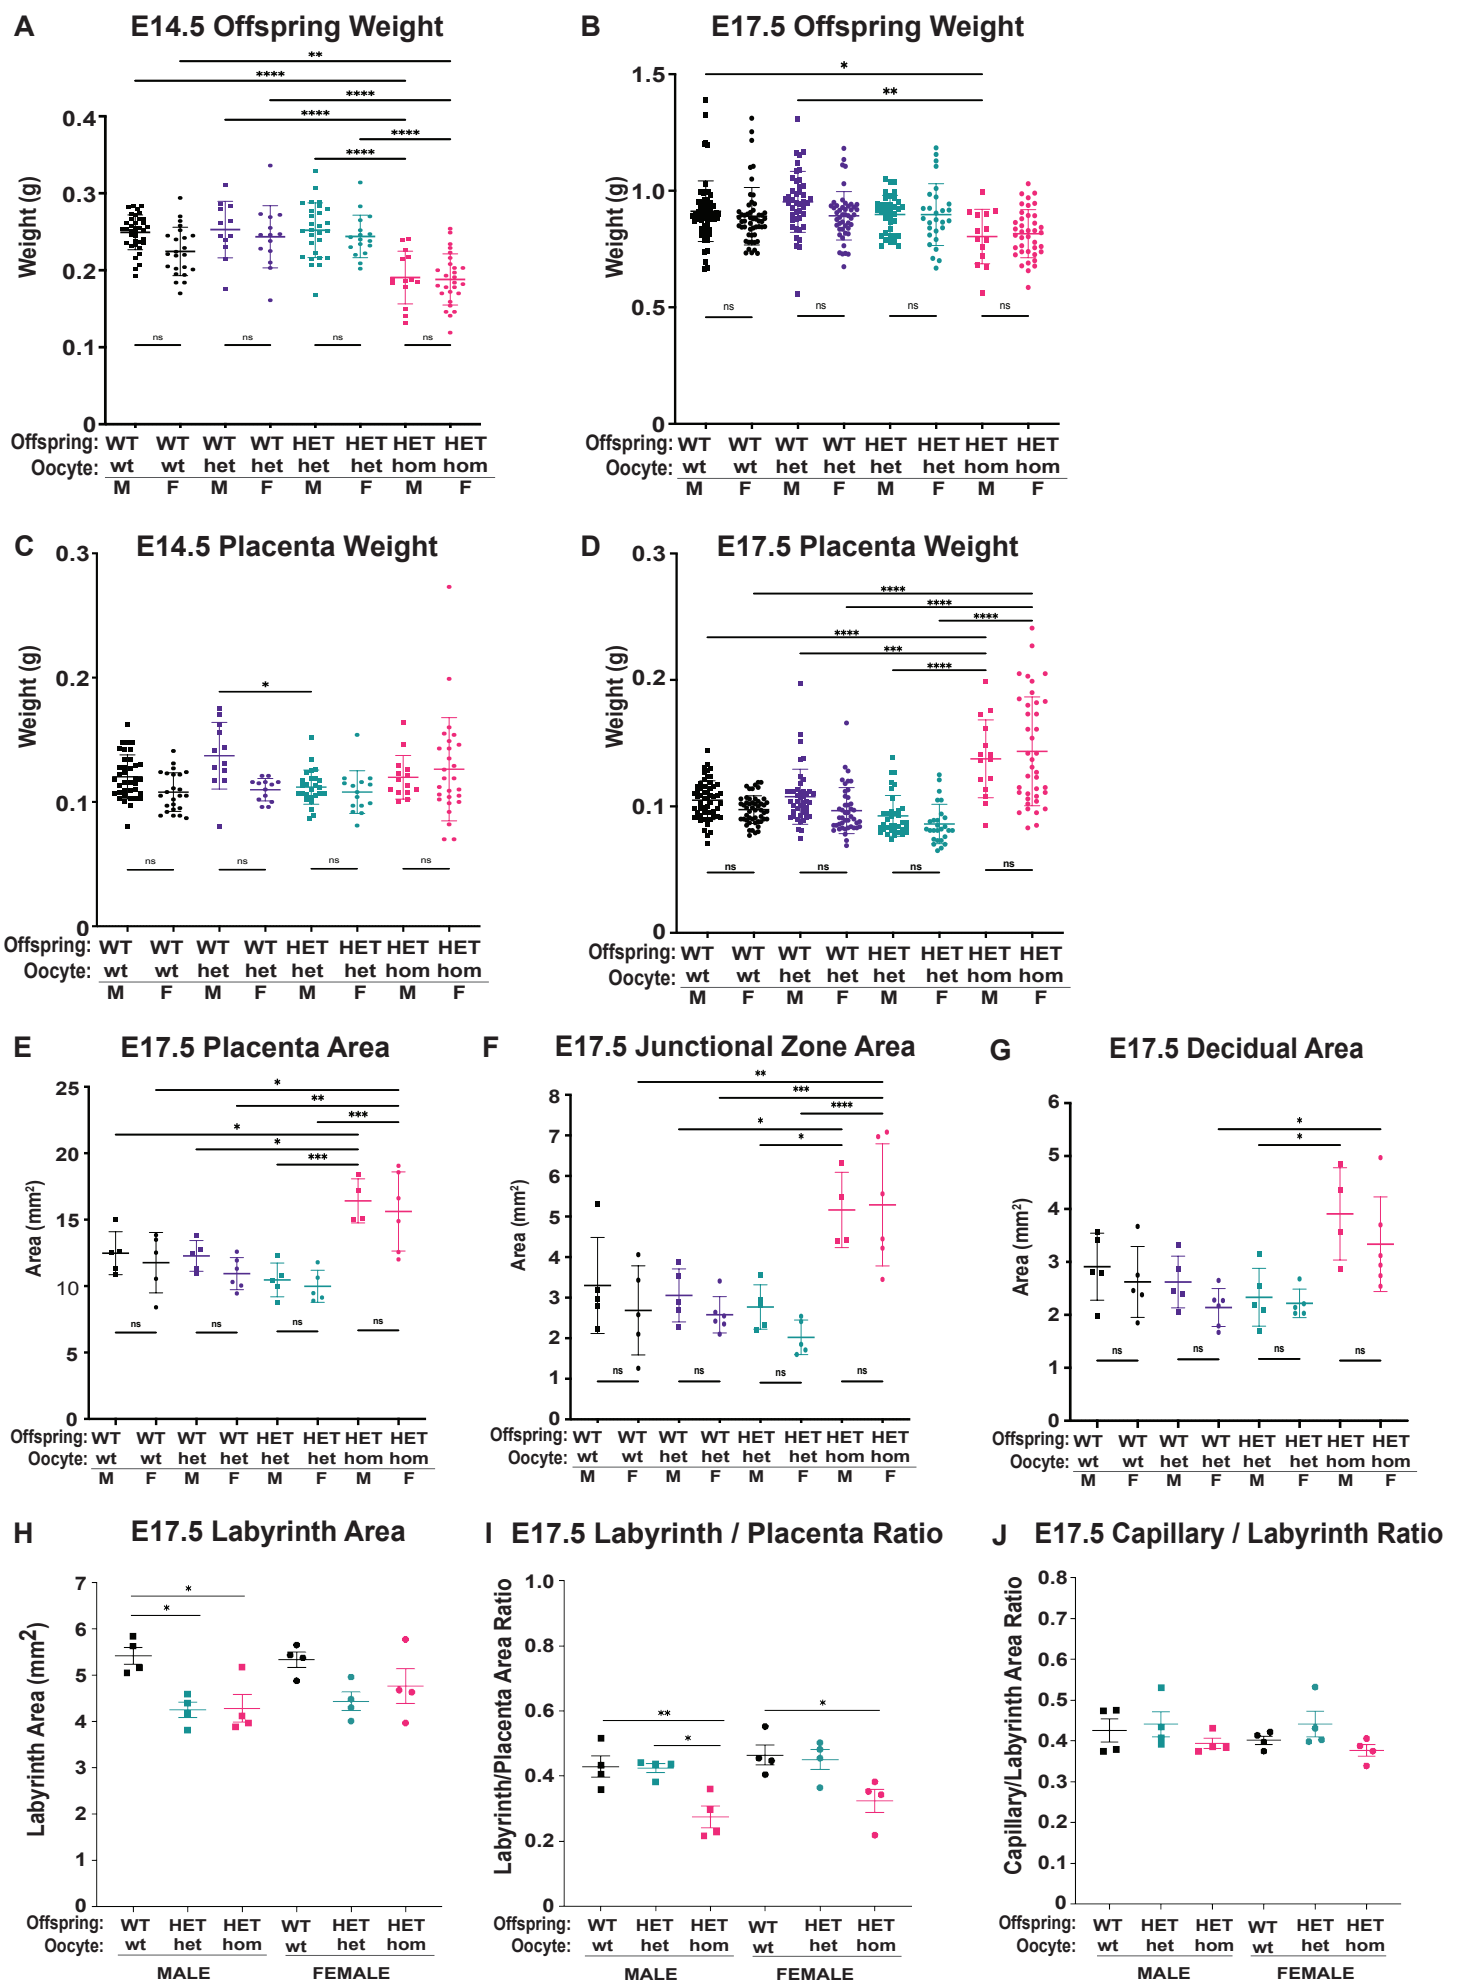

Figure 3 - figure supplement 1

Supplement: supp [file elife-81875-supp-v1.zip]

Expression of PLAC1 in E17.5 Placenta

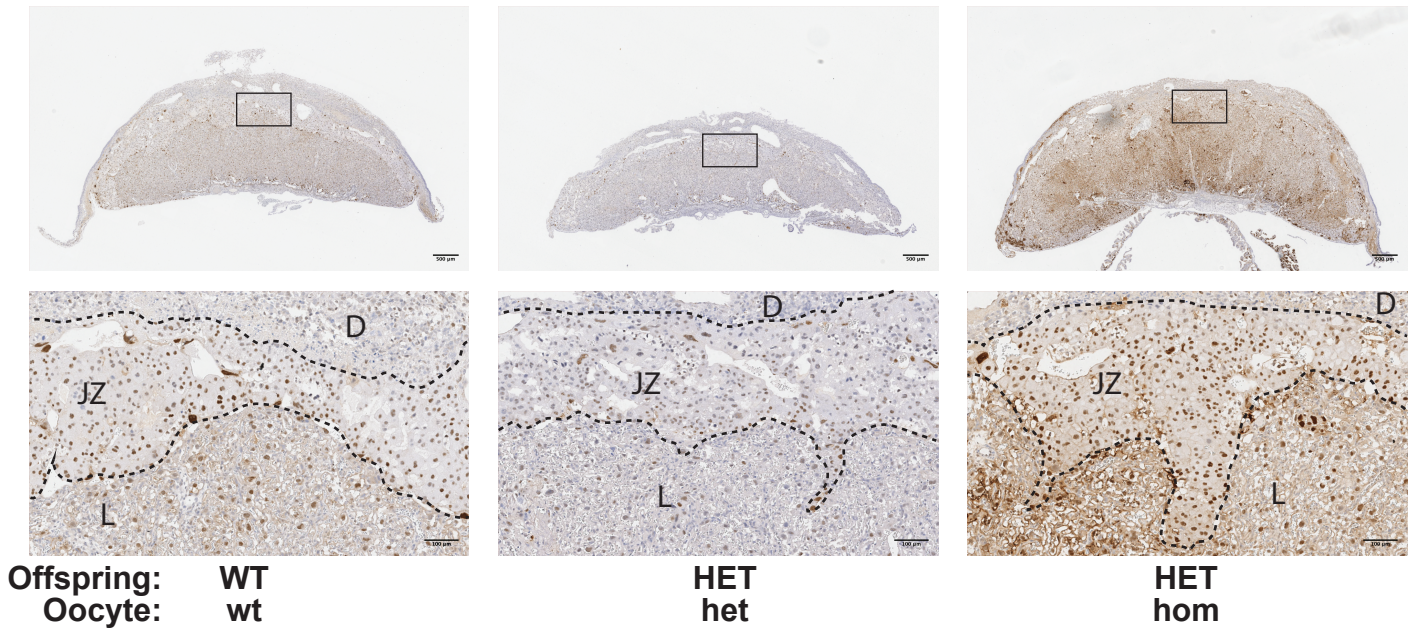

Figure 6 - figure supplement 3

Supplement: supp [file elife-81875-supp-v1.zip]

**A** *Eed* Male Placental DEGs PCA

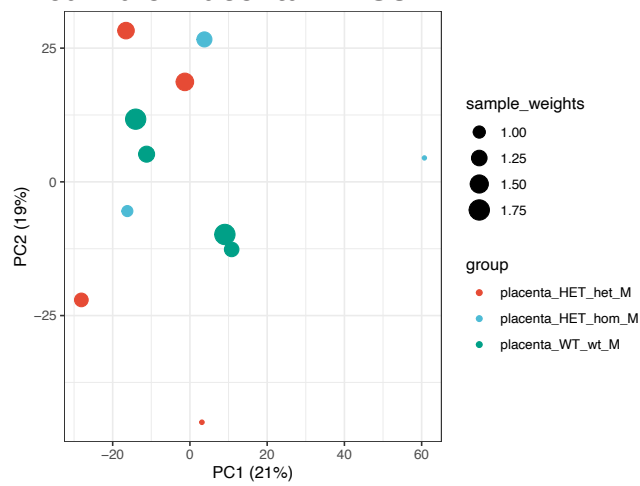

**B** *Eed* Female vs Male Placenta DEGs ( $P < 0.05$ )

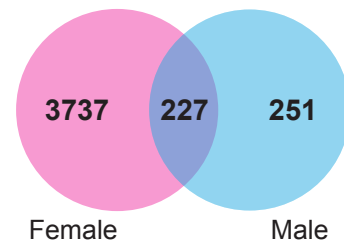

**Figure 6 - figure supplement 1**

Supplement: supp [file elife-81875-supp-v1.zip]

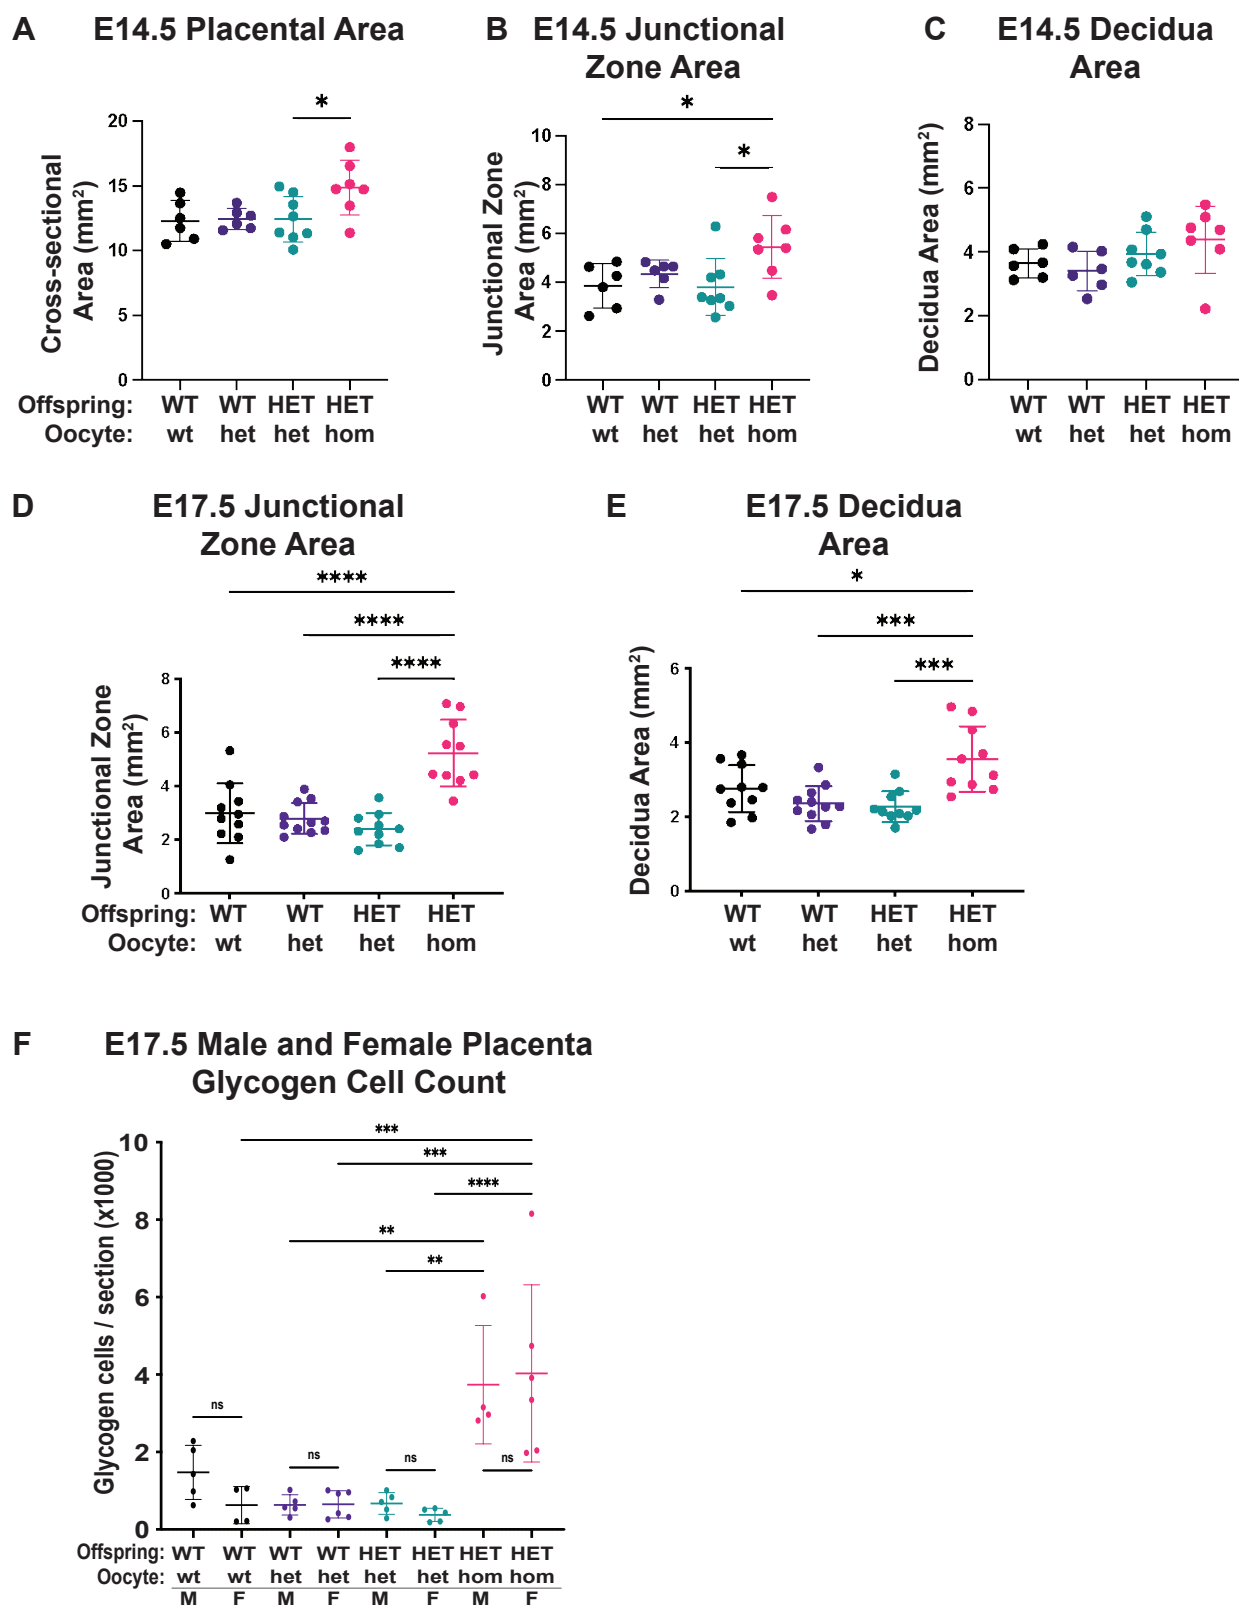

**Figure 4 - figure supplement 1**

Supplement: supp [file elife-81875-supp-v1.zip]

# Female *Eed* Placenta DEGs

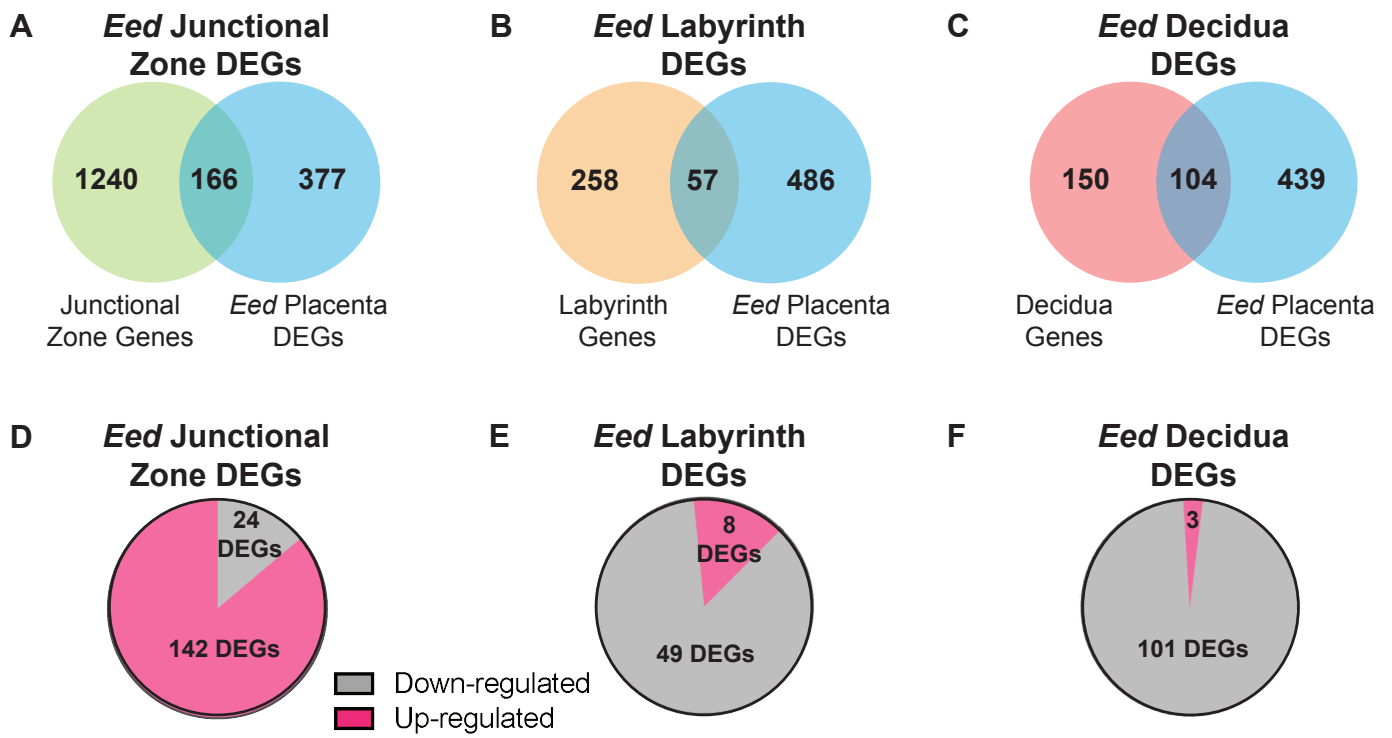

Figure 6 - figure supplement 2

Supplement: supp [file elife-81875-supp-v1.zip]
